# Supplementary material for: Domino assembly of dithiocarbamatesviaCu-catalyzed denitrogenative thiolation of iodotriazole-based diazo precursors
Source: Royal Society of Chemistry journal article supplement (doi:10.1039/d2ob00909a), 2022-01-01
Supplement: d2ob00909a1.pdf [file d2ob00909a1.pdf]

Supporting Information

**Domino assembly of dithiocarbamates *via* Cu-catalyzed denitrogenative  
thiolation of iodotriazole-based diazo precursors**

Yury N. Kotovshchikov,\* Rinat H. Sultanov, Gennadij V. Latyshev,  
Nikolay V. Lukashev, and Irina P. Beletskaya

Chemistry Department, M. V. Lomonosov Moscow State University,  
Leninskiye Gory 1/3, Moscow 119991, Russia

E-mail: [kotovshchikov@org.chem.msu.ru](mailto:kotovshchikov@org.chem.msu.ru)

**Table of Contents**

|                                                                      |      |
|----------------------------------------------------------------------|------|
| General information.....                                             | S2   |
| Experimental procedures and characterization data for compounds..... | S3   |
| Copies of NMR spectra .....                                          | S17  |
| Analysis of crude reaction mixtures .....                            | S67  |
| 2D NMR of <b>3d</b> and <b>11c</b> .....                             | S72  |
| Copies of IR spectra .....                                           | S86  |
| References .....                                                     | S110 |

## General information

NMR spectra were recorded with Bruker Avance 400, Agilent 400MR ( $^1\text{H}$  400 MHz,  $^{13}\text{C}$  100 MHz), and Bruker Avance 600 ( $^1\text{H}$  600 MHz,  $^{13}\text{C}$  151 MHz) spectrometers at ambient temperature. Chemical shifts are presented in ppm ( $\delta$  scale) and referenced to hexamethyl-disiloxane ( $\delta = 0.05$  ppm) or tetramethylsilane ( $\delta = 0$  ppm) in the  $^1\text{H}$  NMR spectra and to the solvent signal in the  $^{13}\text{C}$  NMR spectra. IR spectra ( $\text{cm}^{-1}$ ) were registered on Thermo Scientific Nicolet iS5 FT-IR spectrometer using iD3 Attenuated Total Reflectance (ATR) accessory. IR bands in  $2365\text{--}2340\text{ cm}^{-1}$  range belong to atmospheric  $\text{CO}_2$ . MALDI-TOF spectra were recorded with a Bruker Daltonics UltraFlex instrument in a dithranol matrix using PEG 300, PEG 400 or PEG 600 as the internal standard. ESI mass spectra were obtained from Thermo Scientific LTQ Orbitrap and Sciex TripleTOF 5600+ spectrometers. Column chromatography was carried out on Macherey–Nagel silica gel 60 (0.040–0.063 mm).

## Experimental procedures and characterization data for compounds

### General scheme for the synthesis of 2-(5-iodotriazolyl)phenols **1**

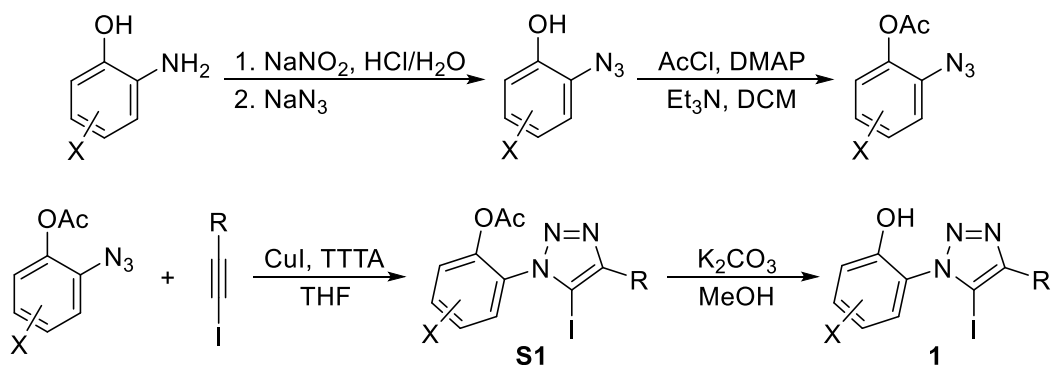

Iodotriazoles **1a-d,f,l,n**, **1e,g,k**<sup>2</sup> and **1h,i,m**<sup>3</sup> were previously reported.

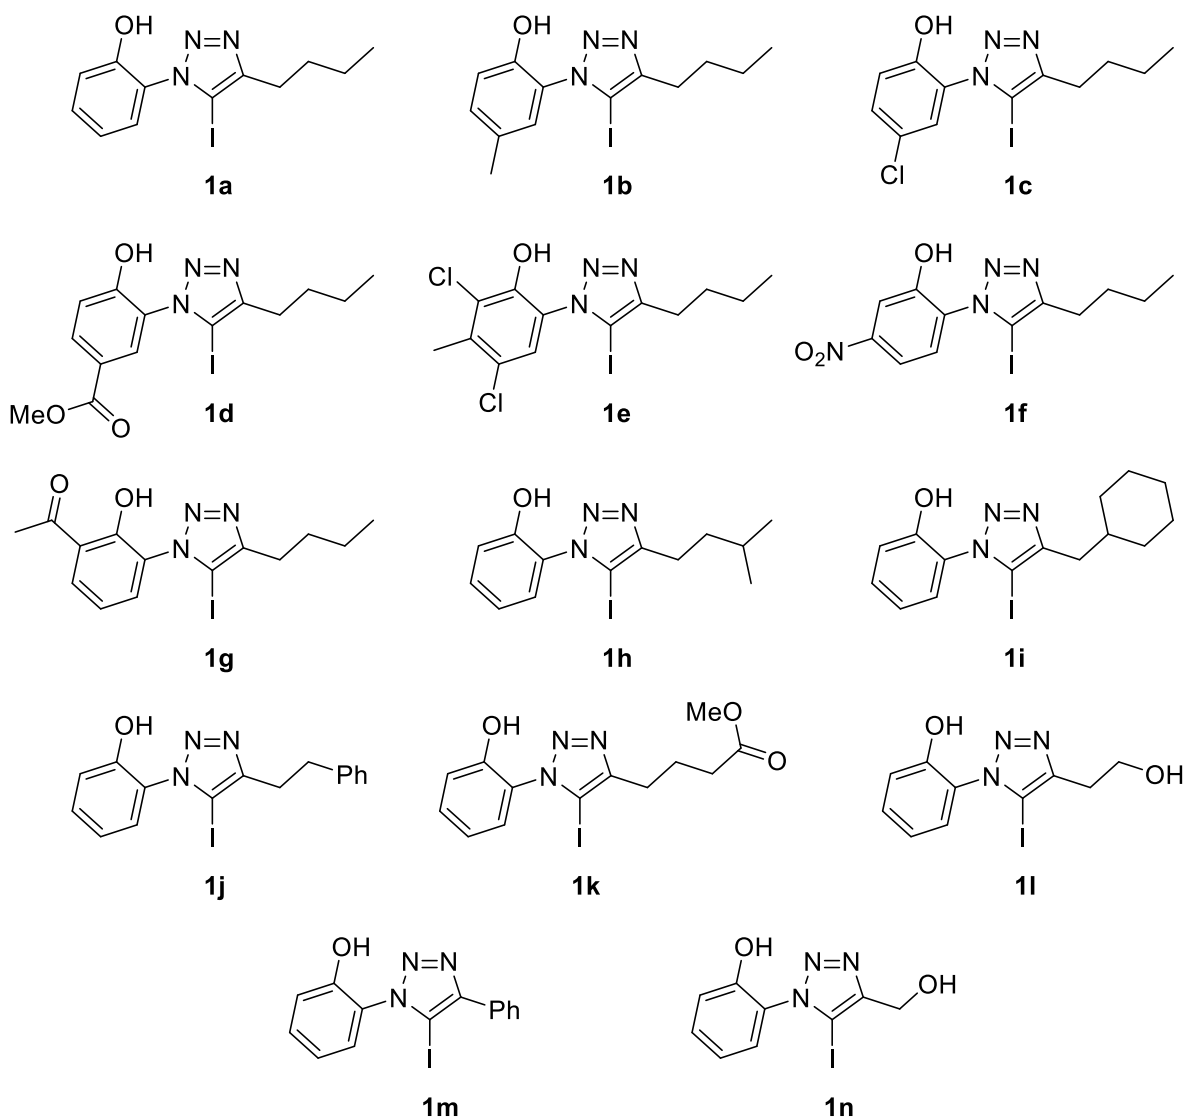

## 2-[5-Iodo-4-(2-phenylethyl)-1H-1,2,3-triazol-1-yl]phenyl acetate (**S1j**)

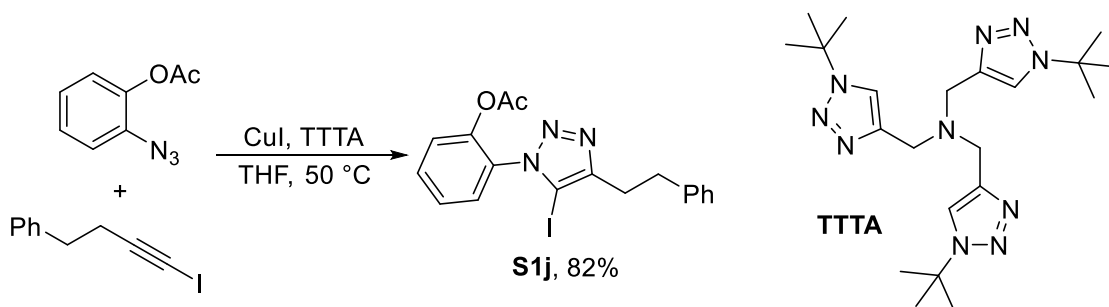

2-Azidophenyl acetate<sup>1</sup> (354.3 mg, 2.00 mmol), (4-iodobut-3-yn-1-yl)benzene<sup>4</sup> (563.4 mg, 2.20 mmol), CuI (19.1 mg, 0.100 mmol, 5 mol %), and tris[(1-*tert*-butyl-1H-1,2,3-triazol-4-yl)methyl]amine (TTTA) (42.8 mg, 0.100 mmol, 5 mol %) were mixed under an Ar atmosphere in THF (4 mL). The reaction mixture was stirred at 50 °C for 48 h (TLC control), then diluted with CH<sub>2</sub>Cl<sub>2</sub> (50 mL), washed with EDTA solution (50 mL) and water (50 mL). The organic layer was dried with anhydrous Na<sub>2</sub>SO<sub>4</sub>, and the solvents were evaporated *in vacuo*. The residue was purified by column chromatography (eluent: hexanes–EtOAc = 4:1). Yield 710 mg (82%). Yellowish solid; <sup>1</sup>H NMR (400 MHz, CDCl<sub>3</sub>) δ 7.58 (m, 1H), 7.44–7.36 (m, 3H), 7.32–7.27 (m, 2H), 7.25–7.18 (m, 3H), 3.12–3.02 (m, 4H, CH<sub>2</sub>CH<sub>2</sub>), 2.04 (s, 3H, CH<sub>3</sub>); <sup>13</sup>C NMR (100 MHz, CDCl<sub>3</sub>) δ 167.9 (C=O), 151.0 (quat.), 145.7 (quat.), 140.8 (quat.), 131.4, 129.2 (quat.), 128.6, 128.5 [2C, CH(Ph)], 128.4 [2C, CH(Ph)], 126.3, 126.2, 123.9, 81.3 (CI), 35.1, 28.1, 20.6.

## 2-[5-Iodo-4-(2-phenylethyl)-1H-1,2,3-triazol-1-yl]phenol (**1j**)

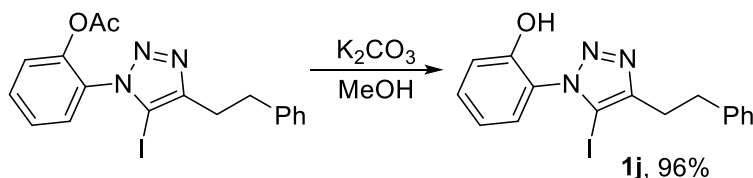

K<sub>2</sub>CO<sub>3</sub> (440 mg, 3.18 mmol, 2 equiv) was added to a solution of 2-(5-iodo-1H-1,2,3-triazol-1-yl)phenyl acetate **S1j** (689 mg, 1.59 mmol) in MeOH (13.7 mL). The obtained suspension was stirred at ambient temperature for 30 min (TLC control), then diluted with 10 % HCl (40 mL) and extracted with CH<sub>2</sub>Cl<sub>2</sub> (3 × 25 mL). Combined organic extracts were dried with anhydrous Na<sub>2</sub>SO<sub>4</sub>, and the solvents were evaporated *in vacuo*. The residue was purified by column chromatography (eluent: CH<sub>2</sub>Cl<sub>2</sub>–MeOH = 30:1). Yield 598 mg (96%). White solid; mp 172–173 °C; <sup>1</sup>H NMR (400 MHz, CDCl<sub>3</sub>–CD<sub>3</sub>OD) δ 7.38 [ddd, *J* = 8.3, 7.3, 1.6 Hz, 1H, 4-CH(Ar)], 7.32–7.26 [m, 2H, 3,5-CH(Ph)], 7.24–7.18 (m, 4H), 7.06 [dd, *J* = 8.3, 1.3 Hz, 1H, 6-CH(Ar)], 6.98 [m, 1H, 4-CH(Ar)], 3.10–2.99 (m, 4H, CH<sub>2</sub>CH<sub>2</sub>); <sup>13</sup>C NMR (100 MHz, CDCl<sub>3</sub>–CD<sub>3</sub>OD) δ 152.3 (quat.), 150.7 (quat.), 140.7 (quat.), 131.7, 128.4 [2C, CH(Ph)], 128.3 [2C, CH(Ph)], 128.1, 126.0, 124.2 (quat.), 119.5, 117.0, 82.7 (CI), 35.1, 28.2; IR (neat, cm<sup>-1</sup>) ν 3061, 3027,

2957, 2924, 2856, 1602, 1516, 1497, 1464, 1420, 1375, 1303, 1279, 1228, 1002, 834, 753, 700;  
HRMS (MALDI-TOF) calcd for C<sub>16</sub>H<sub>15</sub>IN<sub>3</sub>O [M+H]<sup>+</sup> 392.0254; found 392.0247.

### General scheme for the synthesis of 2-(5-iodotriazolyl)benzoic acids **7**

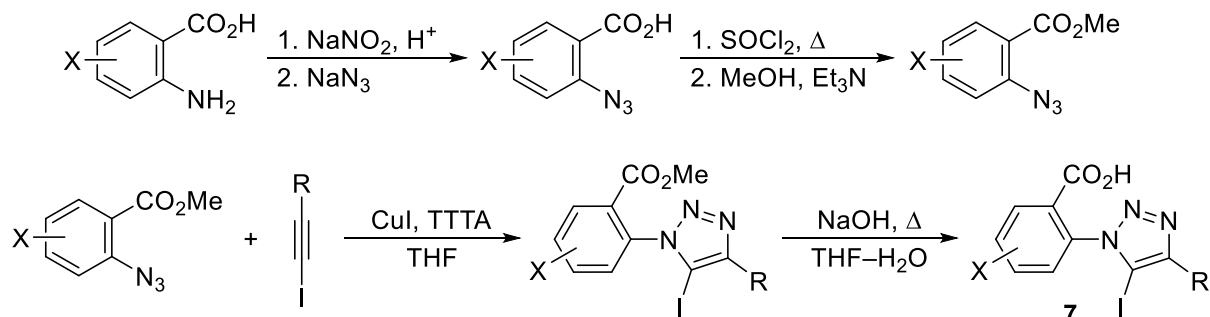

Iodotriazoles **7a-c**<sup>5</sup> were previously reported.

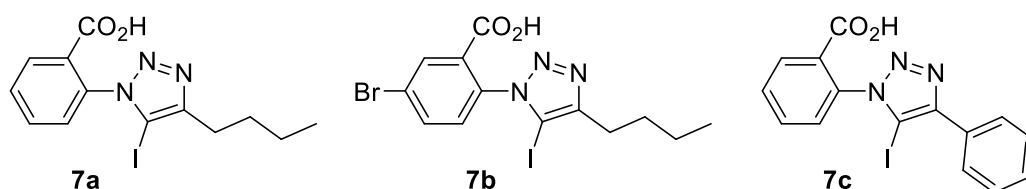

### Synthesis of 1-(1,3-benzoxazol-2-yl)alkyl dithiocarbamates **3**

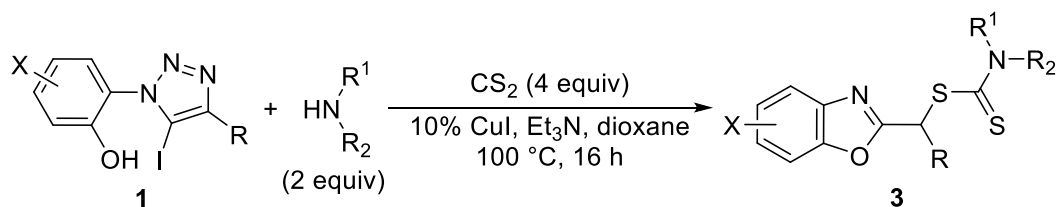

**General procedure.** In a vial with a screw cap iodotriazole **1** (0.25 mmol), secondary amine (0.50 mmol, 2 equiv), CuI (4.8 mg, 0.025 mmol, 10 mol %), CS<sub>2</sub> (60.3 μL, 1.00 mmol, 4 equiv), and Et<sub>3</sub>N (70 μL, 0.50 mmol, 2 equiv) were mixed under an Ar atmosphere in dioxane (2.5 mL). The reaction mixture was stirred at 100 °C for 16 h, then diluted with CH<sub>2</sub>Cl<sub>2</sub> (20 mL), and washed with water (20 mL). The organic layer was dried with anhydrous Na<sub>2</sub>SO<sub>4</sub>, and the solvents were evaporated *in vacuo*. The residue was purified by column chromatography.

### 1-(1,3-Benzoxazol-2-yl)pentyl morpholine-4-carbodithioate (**3a**):

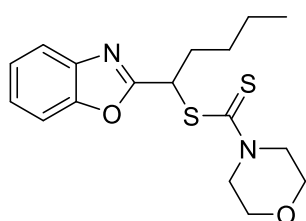

Prepared from iodotriazole **1a** (68.6 mg, 0.20 mmol) and morpholine (36.0 μL, 0.40 mmol) according to the general procedure; eluent: hexanes-EtOAc = 4:1. Yield 52.8 mg (75%). Yellow oil; <sup>1</sup>H NMR (600 MHz, CDCl<sub>3</sub>) δ 7.69 [m, 1H, 4-CH(Ar)], 7.50 [m, 1H, 7-CH(Ar)],

7.33–7.27 [m, 2H, 5,6-CH(Ar)], 5.66 (dd,  $J = 8.2, 6.7$  Hz, 1H, CHS), 4.27 (br s, 2H, CH<sub>2</sub>N), 3.98 (br s, 2H, CH<sub>2</sub>N), 3.76–3.70 (m, 4H, CH<sub>2</sub>O), 2.27 (m, 1H, CH<sub>2</sub>Pr), 2.18 (m, 1H, CH<sub>2</sub>Pr), 1.52–1.33 (m, 4H, CH<sub>2</sub>CH<sub>2</sub>Me), 0.87 (t,  $J = 7.2$  Hz, 3H, CH<sub>3</sub>); <sup>13</sup>C NMR (151 MHz, CDCl<sub>3</sub>)  $\delta$  194.9 (C=S), 165.7 [2-C(Ar)], 150.8 [7a-C(Ar)], 141.2 [3a-C(Ar)], 125.1 [5- or 6-CH(Ar)], 124.4 [5- or 6-CH(Ar)], 120.1 [4-CH(Ar)], 110.7 [7-CH(Ar)], 66.2 (br, 2C, CH<sub>2</sub>O), 51.1 (br, 2C, CH<sub>2</sub>N), 49.1 (CHS), 33.5, 29.3, 22.3, 13.8 (CH<sub>3</sub>); IR (neat, cm<sup>-1</sup>)  $\nu$  2957, 2924, 2856, 1610, 1563, 1455, 1421, 1268, 1230, 1215, 1115, 1030, 996, 762, 748; HRMS (MALDI-TOF) calcd for C<sub>17</sub>H<sub>22</sub>N<sub>2</sub>NaO<sub>2</sub>S<sub>2</sub> [M+Na]<sup>+</sup> 373.1015; found 373.1022.

**1-(1,3-Benzoxazol-2-yl)pentyl thiomorpholine-4-carbodithioate (3b):**

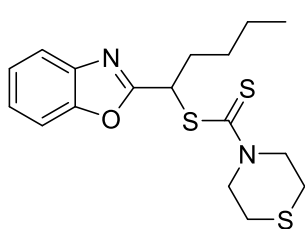

Prepared from iodotriazole **1a** (85.8 mg, 0.25 mmol) and thiomorpholine (50.3  $\mu$ L, 0.50 mmol) according to the general procedure; eluent: hexanes–EtOAc = 8:1. Yield 46 mg (50%). Brown oil; <sup>1</sup>H NMR (400 MHz, CDCl<sub>3</sub>)  $\delta$  7.70 [m, 1H, 4-CH(Ar)], 7.50 [m, 1H, 7-CH(Ar)], 7.34–7.27 [m, 2H, 5,6-CH(Ar)], 5.62 (dd,  $J = 8.1, 6.8$  Hz, 1H, CHS), 4.55 (br s, 2H, CH<sub>2</sub>N), 4.25 (br s, 2H, CH<sub>2</sub>N), 2.76–2.68 (m, 4H, CH<sub>2</sub>S), 2.31–2.11 (m, 2H, CH<sub>2</sub>Pr), 1.53–1.31 (m, 4H, CH<sub>2</sub>CH<sub>2</sub>Me), 0.87 (t,  $J = 7.0$  Hz, 3H, CH<sub>3</sub>); <sup>13</sup>C NMR (100 MHz, CDCl<sub>3</sub>)  $\delta$  194.0 (C=S), 165.7 [2-C(Ar)], 150.6 [7a-C(Ar)], 141.1 [3a-C(Ar)], 125.0 [5- or 6-CH(Ar)], 124.3 [5- or 6-CH(Ar)], 120.1 [4-CH(Ar)], 110.6 [7-CH(Ar)], 54.6 (br, CH<sub>2</sub>N), 53.3 (br, CH<sub>2</sub>N), 49.2 (CHS), 33.5, 29.3, 27.2 (br, 2C, CH<sub>2</sub>S), 22.2, 13.8 (CH<sub>3</sub>); IR (neat, cm<sup>-1</sup>)  $\nu$  2956, 2925, 2870, 2858, 1611, 1564, 1467, 1454, 1435, 1414, 1356, 1282, 1243, 1214, 1191, 1143, 1031, 1003, 949, 935, 762, 747; HRMS (MALDI-TOF) calcd for C<sub>17</sub>H<sub>23</sub>N<sub>2</sub>OS<sub>3</sub> [M+H]<sup>+</sup> 367.0967; found 367.0969.

**1-(1,3-Benzoxazol-2-yl)pentyl piperidine-4-carbodithioate (3c):**

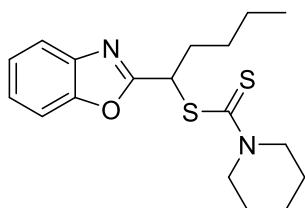

Prepared from iodotriazole **1a** (85.8 mg, 0.25 mmol) and piperidine (49.4  $\mu$ L, 0.50 mmol) according to the general procedure; eluent: hexanes–EtOAc = 10:1. Yield 56.5 mg (65%). Brownish solid; mp 75–77 °C; <sup>1</sup>H NMR (400 MHz, CDCl<sub>3</sub>)  $\delta$  7.70 [m, 1H, 4-CH(Ar)], 7.50 [m, 1H, 7-CH(Ar)], 7.33–7.26 [m, 2H, 5,6-CH(Ar)], 5.67 (dd,  $J = 8.2, 6.7$  Hz, 1H, CHS), 4.38–4.14 (m, 2H, CH<sub>2</sub>N), 3.87 (br s, 2H, CH<sub>2</sub>N), 2.32–2.12 (m, 2H, CH<sub>2</sub>Pr), 1.73–1.59 [m, 6H, 3,4,5-CH<sub>2</sub>(piperidine)], 1.53–1.32 (m, 4H, CH<sub>2</sub>CH<sub>2</sub>Me), 0.87 (t,  $J = 7.1$  Hz, 3H, CH<sub>3</sub>); <sup>13</sup>C NMR (100 MHz, CDCl<sub>3</sub>)  $\delta$  192.8 (C=S), 166.1 [2-C(Ar)], 150.6 [7a-C(Ar)], 141.1 [3a-C(Ar)], 124.9 [5- or 6-CH(Ar)], 124.2 [5- or 6-CH(Ar)], 120.0 [4-CH(Ar)], 110.6 [7-CH(Ar)], 53.3 (br, CH<sub>2</sub>N), 51.5 (br, CH<sub>2</sub>N), 49.2 (CHS), 33.6, 29.3, 26.0 (br, CH<sub>2</sub>CH<sub>2</sub>N), 25.4 (br, CH<sub>2</sub>CH<sub>2</sub>N), 24.2, 22.3, 13.8 (CH<sub>3</sub>); IR (neat, cm<sup>-1</sup>)  $\nu$  2935, 2857, 1611, 1564, 1475, 1454, 1429, 1280, 1242, 1227, 1134,

1113, 1004, 976, 763, 747; HRMS (MALDI-TOF) calcd for  $C_{18}H_{24}N_2NaOS_2$   $[M+Na]^+$  371.1222; found 371.1221.

**1-(1,3-Benzoxazol-2-yl)pentyl pyrrolidine-4-carbodithioate (3d):**

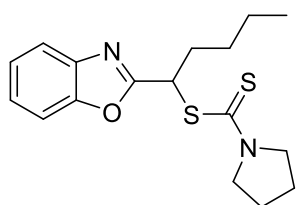

Prepared from iodotriazole **1a** (85.8 mg, 0.25 mmol) and pyrrolidine (41.7  $\mu$ L, 0.50 mmol) according to the general procedure; eluent: hexanes–EtOAc = 10:1. Yield 42.8 mg (51%). Brownish solid; mp 66–68  $^{\circ}$ C;  $^1$ H NMR (600 MHz,  $CDCl_3$ )  $\delta$  7.72 [m, 1H, 4-CH(Ar)], 7.52 [m, 1H, 7-CH(Ar)], 7.34–7.30 [m, 2H, 5,6-CH(Ar)], 5.70 (dd,  $J = 7.9, 7.0$  Hz, 1H, CHS), 3.97–3.90 (m, 2H,  $CH_2N$ ), 3.71–3.64 (m, 2H,  $CH_2N$ ), 2.29 (m, 1H,  $CH_2Pr$ ), 2.20 (m, 1H,  $CH_2Pr$ ), 2.11–2.03 (m, 2H,  $CH_2CH_2N$ ), 2.01–1.93 (m, 2H,  $CH_2CH_2N$ ), 1.50 (m, 1H,  $CH_2Et$ ), 1.43 (m, 1H,  $CH_2Et$ ), 1.39 (m, 2H,  $CH_2Me$ ), 0.90 (t,  $J = 7.1$  Hz, 3H,  $CH_3$ );  $^{13}C$  NMR (151 MHz,  $CDCl_3$ )  $\delta$  189.9 (C=S), 165.9 [2-C(Ar)], 150.6 [7a-C(Ar)], 141.0 [3a-C(Ar)], 124.9 [6-CH(Ar)], 124.2 [5-CH(Ar)], 119.9 [4-CH(Ar)], 110.6 [7-CH(Ar)], 55.3 ( $CH_2N$ ), 50.5 ( $CH_2N$ ), 48.3 (CHS), 33.4 ( $CH_2Pr$ ), 29.1 ( $CH_2Et$ ), 26.0 ( $CH_2CH_2N$ ), 24.1 ( $CH_2CH_2N$ ), 22.2 ( $CH_2Me$ ), 13.8 ( $CH_3$ ); IR (neat,  $cm^{-1}$ )  $\nu$  2956, 2928, 2871, 1611, 1564, 1501, 1454, 1434, 1338, 1242, 1183, 1160, 1104, 1006, 957, 763, 747; HRMS (MALDI-TOF) calcd for  $C_{17}H_{23}N_2OS_2$   $[M+H]^+$  335.1246; found 335.1249.

**1-(1,3-Benzoxazol-2-yl)pentyl (2R,6S)-2,6-dimethylmorpholine-4-carbodithioate (3e):**

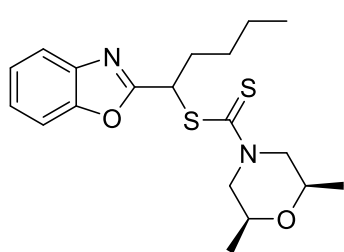

Prepared from iodotriazole **1a** (85.8 mg, 0.25 mmol) and *cis*-2,6-dimethylmorpholine (61.6  $\mu$ L, 0.50 mmol) according to the general procedure; eluent: hexanes–EtOAc = 8:1. Yield 45.7 mg (48%). Yellow oil;  $^1$ H NMR (600 MHz,  $CDCl_3$ )  $\delta$  7.72 [m, 1H, 4-CH(Ar)], 7.52 [m, 1H, 7-CH(Ar)], 7.35–7.30 [m, 2H, 5,6-CH(Ar)], 5.69 (dd,  $J = 8.0, 6.8$  Hz, 1H, CHS), 5.42 (m, 1H), 4.45 (m, 1H), 3.74–3.57 (m, 2H, CHO), 2.89 (m, 1H), 2.76 (m, 1H), 2.28 (m, 1H,  $CH_2Pr$ ), 2.21 (m, 1H,  $CH_2Pr$ ), 1.54–1.35 (m, 4H,  $CH_2CH_2Me$ ), 1.23 (d,  $J = 6.2$  Hz, 3H,  $CHCH_3$ ), 1.22 (br s, 3H,  $CHCH_3$ ), 0.89 (t,  $J = 7.1$  Hz, 3H,  $CH_2CH_3$ );  $^{13}C$  NMR (151 MHz,  $CDCl_3$ )  $\delta$  194.2 (C=S), 165.8 [2-C(Ar)], 150.7 [7a-C(Ar)], 141.1 [3a-C(Ar)], 125.0 [5- or 6-CH(Ar)], 124.3 [5- or 6-CH(Ar)], 120.1 [4-CH(Ar)], 110.6 [7-CH(Ar)], 71.3 (br, 2C, CHO), 56.5 (br,  $CH_2N$ ), 55.3 (br,  $CH_2N$ ), 48.9 (CHS), 33.6, 29.3, 22.3, 18.5 (2C,  $CHCH_3$ ), 13.8 ( $CH_2CH_3$ ); IR (neat,  $cm^{-1}$ )  $\nu$  2957, 2930, 2859, 1611, 1564, 1455, 1422, 1376, 1323, 1231, 1172, 1138, 1097, 1082, 1001, 965, 948, 929, 839, 762, 747; HRMS (MALDI-TOF) calcd for  $C_{19}H_{27}N_2O_2S_2$   $[M+H]^+$  379.1508; found 379.1511.

### 1-(1,3-Benzoxazol-2-yl)pentyl 4-acetylpiperazine-1-carbodithioate (3f):

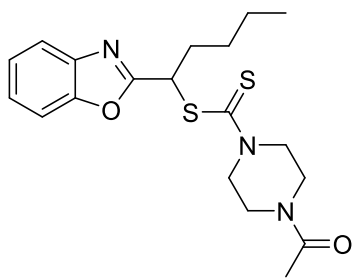

Prepared from iodotriazole **1a** (85.8 mg, 0.25 mmol) and *N*-acetylpiperazine (75.7 mg, 0.59 mmol) according to the general procedure; eluent: EtOAc. Yield 54 mg (55%). Brown oil;  $^1\text{H}$  NMR (400 MHz,  $\text{CDCl}_3$ )  $\delta$  7.72 [m, 1H, 4-CH(Ar)], 7.53 [m, 1H, 7-CH(Ar)], 7.37–7.29 [m, 2H, 5,6-CH(Ar)], 5.64 (dd,  $J = 8.2, 6.7$  Hz, 1H, CHS), 4.32 (br s, 2H,  $\text{CH}_2\text{NCS}_2$ ), 4.02 (br s, 2H,  $\text{CH}_2\text{NCS}_2$ ), 3.77–3.71 (m, 2H,  $\text{CH}_2\text{Nac}$ ), 3.63–3.57 (m, 2H,  $\text{CH}_2\text{Nac}$ ), 2.35–2.15 (m, 2H,  $\text{CH}_2\text{Pr}$ ), 2.13 (s, 3H, Ac), 1.56–1.33 (m, 4H,  $\text{CH}_2\text{CH}_2\text{Me}$ ), 0.90 (t,  $J = 7.1$  Hz, 3H,  $\text{CH}_2\text{CH}_3$ );  $^{13}\text{C}$  NMR (100 MHz,  $\text{CDCl}_3$ )  $\delta$  194.9 (C=S), 169.2 (C=O), 165.5 [2-C(Ar)], 150.6 [7a-C(Ar)], 140.9 [3a-C(Ar)], 125.0 [5- or 6-CH(Ar)], 124.3 [5- or 6-CH(Ar)], 120.0 [4-CH(Ar)], 110.6 [7-CH(Ar)], 50.6 (br,  $\text{CH}_2\text{NCS}_2$ ), 49.5 (br,  $\text{CH}_2\text{NCS}_2$ ), 49.2 (CHS), 45.0 ( $\text{CH}_2\text{Nac}$ ), 40.4 ( $\text{CH}_2\text{Nac}$ ), 33.3, 29.2, 22.2, 21.2 [ $\text{CH}_3\text{C(O)}$ ], 13.7 ( $\text{CH}_2\text{CH}_3$ ); IR (neat,  $\text{cm}^{-1}$ )  $\nu$  2956, 2927, 2870, 2859, 1652 (C=O), 1612, 1564, 1455, 1419, 1360, 1282, 1241, 1223, 1161, 1104, 1032, 987, 963, 923, 837, 763, 749; HRMS (MALDI-TOF) calcd for  $\text{C}_{19}\text{H}_{26}\text{N}_3\text{O}_2\text{S}_2$  [ $\text{M}+\text{H}$ ] $^+$  392.1461; found 392.1462.

### 1-(1,3-Benzoxazol-2-yl)pentyl 3,4-dihydroisoquinoline-2(1H)-carbodithioate (3g):

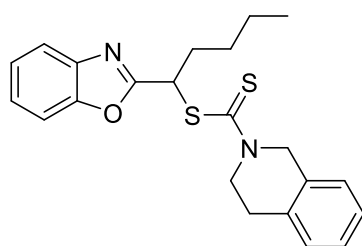

Prepared from iodotriazole **1a** (85.8 mg, 0.25 mmol) and 1,2,3,4-tetrahydroisoquinoline (62.6  $\mu\text{L}$ , 0.50 mmol) according to the general procedure; eluent: hexanes–EtOAc = 10:1. Yield 62.5 mg (63%). Yellowish oil; mixture of two rotamers (58:42) in  $\text{CDCl}_3$ ;  $^1\text{H}$  NMR (400 MHz,  $\text{CDCl}_3$ )  $\delta$  7.72 [m, 1H, 4-CH(benzoxazole)], 7.52 [m, 1H, 7-CH(benzoxazole)], 7.35–7.28 [m, 2H, 5,6-CH(benzoxazole)], 7.25–7.08 (m, 4H), 5.76 (dd,  $J = 8.1, 6.9$  Hz, 1H, CHS), 5.36 [d,  $J = 17.2$  Hz, 1H, 1- $\text{CH}_2$ (isoquinoline), major], 5.27 [d,  $J = 17.2$  Hz, 1H, 1- $\text{CH}_2$ (isoquinoline), major], 5.01 [br s, 2H, 1- $\text{CH}_2$ (isoquinoline), minor], 4.50–4.36 [m, 2H, 3- $\text{CH}_2$ (isoquinoline), minor], 4.12–4.03 [m, 2H, 3- $\text{CH}_2$ (isoquinoline), major], 2.98 [br t,  $J = 6.0$  Hz, 2H, 4- $\text{CH}_2$ (isoquinoline)], 2.36–2.17 (m, 2H,  $\text{CH}_2\text{Pr}$ ), 1.58–1.34 (m, 4H,  $\text{CH}_2\text{CH}_2\text{Me}$ ), 0.90 (t,  $J = 7.1$  Hz, 3H,  $\text{CH}_3$ );  $^{13}\text{C}$  NMR (100 MHz,  $\text{CDCl}_3$ )  $\delta$  193.7 [ $2\times\text{C}$ , C=S], 165.8 [ $2\times 2\text{-C}$ (benzoxazole)], 150.7 [ $2\times 7\text{a-C}$ (benzoxazole)], 141.1 [ $2\times 3\text{a-C}$ (benzoxazole)], 135.0 (quat.), 134.2 (quat.), 132.6 (quat.), 131.3 (quat.), 128.2, 127.6, 127.4, 127.2, 126.9, 126.7, 126.6, 126.2, 125.0 [ $2\times\text{C}$ , 5- or 6-CH(benzoxazole)], 124.3 [ $2\times\text{C}$ , 5- or 6-CH(benzoxazole)], 120.0 [ $2\times\text{C}$ , 4-CH(benzoxazole)], 110.7 [ $2\times\text{C}$ , 7-CH(benzoxazole)], 54.2, 51.3, 50.3, 48.9, 48.7, 48.0, 33.5 ( $2\times\text{C}$ ), 29.3 ( $2\times\text{C}$ ), 29.0 ( $\text{CH}_2\text{CH}_2\text{N}$ ), 28.5 ( $\text{CH}_2\text{CH}_2\text{N}$ ), 22.3 ( $2\times\text{C}$ ), 13.8 ( $2\times\text{CH}_3$ ); IR (neat,  $\text{cm}^{-1}$ )  $\nu$  2955, 2925, 2869, 2857, 1610, 1562, 1453, 1421, 1402, 1341, 1278, 1241, 1220,



1186, 1153, 1109, 1002, 955, 926, 837, 762, 746; HRMS (MALDI-TOF) calcd for C<sub>22</sub>H<sub>25</sub>N<sub>2</sub>OS<sub>2</sub> [M+H]<sup>+</sup> 397.1403; found 397.1404.

**1-(1,3-Benzoxazol-2-yl)pentyl benzyl(ethyl)dithiocarbamate (3h):**

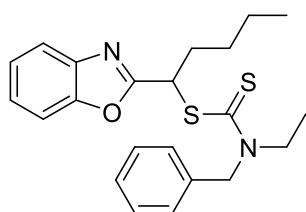

Prepared from iodotriazole **1a** (85.8 mg, 0.25 mmol) and benzyl(ethyl)amine (74.4  $\mu$ L, 0.50 mmol) according to the general procedure; eluent: hexanes–EtOAc = 10:1. Yield 62.6 mg (63%).

Yellow oil; mixture of two rotamers (58:42) in CDCl<sub>3</sub>; <sup>1</sup>H NMR (400 MHz, CDCl<sub>3</sub>)  $\delta$  7.76–7.69 [m, 1H, 4-CH(Ar)], 7.56–7.49 [m, 1H, 7-CH(Ar)], 7.36–7.18 [m, 7H, 2H 5,6-CH(Ar) + 5H CH(Ph)], 5.73–5.67 (m, 1H, CHS), 5.38 (d, *J* = 14.9 Hz, 1H, CH<sub>2</sub>Ph, major), 5.29 (d, *J* = 14.9 Hz, 1H, CH<sub>2</sub>Ph, major), 5.03 (d, *J* = 16.4 Hz, 1H, CH<sub>2</sub>Ph, minor), 4.89 (d, *J* = 16.4 Hz, 1H, CH<sub>2</sub>Ph, minor), 4.10 (m, 1H, NCH<sub>2</sub>CH<sub>3</sub>, minor), 3.94 (m, 1H, NCH<sub>2</sub>CH<sub>3</sub>, minor), 3.83–3.63 (m, 2H, NCH<sub>2</sub>CH<sub>3</sub>, major), 2.38–2.13 (m, 2H, CH<sub>2</sub>Pr), 1.57–1.33 (m, 4H, CH<sub>2</sub>CH<sub>2</sub>Me), 1.28–1.20 (m, 3H, NCH<sub>2</sub>CH<sub>3</sub>), 0.94–0.85 (m, 3H, CH<sub>2</sub>CH<sub>2</sub>CH<sub>3</sub>); <sup>13</sup>C NMR (100 MHz, CDCl<sub>3</sub>)  $\delta$  195.0 (C=S), 194.1 (C=S), 165.5 [2 $\times$ 2-C(Ar)], 150.3 [2 $\times$ 7a-C(Ar)], 140.8 [2 $\times$ 3a-C(Ar)], 135.2 [1-C(Ph), major], 134.2 [1-C(Ph), minor], 128.5 [2C, CH(Ph), minor], 128.3 [2C, CH(Ph), major], 127.6 [4-CH(Ph), minor], 127.4 [2 $\times$ 2C, CH(Ph)], 126.6 [4-CH(Ph), major], 124.6 [2 $\times$ C, 5- or 6-CH(Ar)], 123.9 [2 $\times$ C, 5- or 6-CH(Ar)], 119.7 [2 $\times$ C, 4-CH(Ar)], 110.3 [2 $\times$ C, 7-CH(Ar)], 56.7 (CH<sub>2</sub>Ph, major), 54.6 (CH<sub>2</sub>Ph, minor), 49.6 (NCH<sub>2</sub>Me, minor), 49.3 (2 $\times$ CHS), 46.0 (NCH<sub>2</sub>Me, major), 33.4 (major), 33.2 (minor), 29.0 (2 $\times$ C), 21.9 (2 $\times$ C), 13.5 (2 $\times$ C, CH<sub>2</sub>CH<sub>2</sub>CH<sub>3</sub>), 11.9 (NCH<sub>2</sub>CH<sub>3</sub>, major), 10.8 (NCH<sub>2</sub>CH<sub>3</sub>, minor); IR (neat, cm<sup>-1</sup>)  $\nu$  2957, 2928, 2870, 2858, 1610, 1561, 1496, 1479, 1466, 1453, 1438, 1414, 1378, 1353, 1290, 1241, 1192, 1171, 1114, 1103, 1077, 1002, 951, 837, 762, 746, 697; HRMS (MALDI-TOF) calcd for C<sub>22</sub>H<sub>27</sub>N<sub>2</sub>OS<sub>2</sub> [M+H]<sup>+</sup> 399.1559; found 399.1540.

**1-(5-Methyl-1,3-benzoxazol-2-yl)pentyl morpholine-4-carbodithioate (3l):**

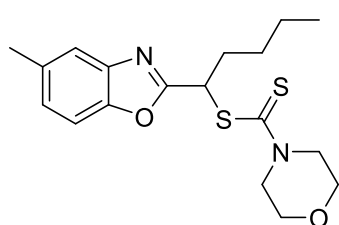

Prepared from iodotriazole **1b** (89.3 mg, 0.25 mmol) and morpholine (45.0  $\mu$ L, 0.50 mmol) according to the general procedure; eluent: hexanes–EtOAc = 4:1. Yield 59.1 mg (65%).

Yellow oil; <sup>1</sup>H NMR (400 MHz, CDCl<sub>3</sub>)  $\delta$  7.50 [br s, 1H, 4-CH(Ar)], 7.39 [d, *J* = 8.3 Hz, 1H, 7-CH(Ar)], 7.13 [br d, *J* = 8.3 Hz, 1H, 6-CH(Ar)], 5.64 (dd, *J* = 8.2, 6.7 Hz, 1H, CHS), 4.31 (br s, 2H, CH<sub>2</sub>N), 3.95 (br s, 2H, CH<sub>2</sub>N), 3.79–3.71 (m, 4H, CH<sub>2</sub>O), 2.45 [s, 3H, CH<sub>3</sub>C(Ar)], 2.34–2.12 (m, 2H, CH<sub>2</sub>Pr), 1.53–1.33 (m, 4H, CH<sub>2</sub>CH<sub>2</sub>Me), 0.89 (t, *J* = 6.9 Hz, 3H, CH<sub>2</sub>CH<sub>3</sub>); <sup>13</sup>C NMR (100 MHz, CDCl<sub>3</sub>)  $\delta$  194.7 (C=S), 165.6 [2-C(Ar)], 148.8 [7a-C(Ar)], 141.2 [3a-C(Ar)], 134.1 [5-C(Ar)], 126.1 [6-CH(Ar)], 119.9 [4-CH(Ar)], 110.0 [7-CH(Ar)], 66.1 (br, 2C, CH<sub>2</sub>O), 51.6 (br, CH<sub>2</sub>N), 50.5 (br,

CH<sub>2</sub>N), 49.0 (CHS), 33.5, 29.2, 22.2, 21.4 [CH<sub>3</sub>C(Ar)], 13.8 (CH<sub>2</sub>CH<sub>3</sub>); IR (neat, cm<sup>-1</sup>)  $\nu$  2957, 2925, 2857, 1564, 1460, 1420, 1267, 1228, 1214, 1179, 1113, 1029, 995, 868, 842, 800; HRMS (ESI-TOF) calcd for C<sub>18</sub>H<sub>25</sub>N<sub>2</sub>O<sub>2</sub>S<sub>2</sub> [M+H]<sup>+</sup> 365.1352; found 365.1355.

**1-(5-Chloro-1,3-benzoxazol-2-yl)pentyl morpholine-4-carbodithioate (3m):**

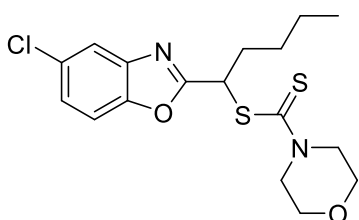

Prepared from iodotriazole **1c** (94.2 mg, 0.25 mmol) and morpholine (45.0  $\mu$ L, 0.50 mmol) according to the general procedure; eluent: hexanes–EtOAc = 6:1. Yield 61.0 mg (63%). Yellow oil; <sup>1</sup>H NMR (400 MHz, CDCl<sub>3</sub>)  $\delta$  7.69 [d, *J* = 1.9 Hz, 1H, 4-CH(Ar)], 7.45 [d, *J* = 8.7 Hz, 1H, 7-CH(Ar)], 7.30 [dd, *J* = 8.7, 1.9 Hz, 1H, 6-CH(Ar)], 5.64 (dd, *J* = 8.1, 6.8 Hz, 1H, CHS), 4.31 (br s, 2H, CH<sub>2</sub>N), 3.96 (br s, 2H, CH<sub>2</sub>N), 3.81–3.71 (m, 4H, CH<sub>2</sub>O), 2.32–2.12 (m, 2H, CH<sub>2</sub>Pr), 1.54–1.33 (m, 4H, CH<sub>2</sub>CH<sub>2</sub>Me), 0.90 (t, *J* = 7.1 Hz, 3H, CH<sub>3</sub>); <sup>13</sup>C NMR (100 MHz, CDCl<sub>3</sub>)  $\delta$  194.4 (C=S), 167.3 [2-C(Ar)], 149.2 [7a-C(Ar)], 142.2 [3a-C(Ar)], 129.8 [5-C(Ar)], 125.3 [6-CH(Ar)], 120.0 [4-CH(Ar)], 111.4 [7-CH(Ar)], 66.1 (br, 2C, CH<sub>2</sub>O), 51.6 (br, CH<sub>2</sub>N), 50.6 (br, CH<sub>2</sub>N), 48.9 (CHS), 33.2, 29.2, 22.2, 13.8 (CH<sub>3</sub>); IR (neat, cm<sup>-1</sup>)  $\nu$  2958, 2925, 2857, 1560, 1451, 1420, 1268, 1257, 1229, 1214, 1189, 1113, 1054, 1029, 995, 919, 865, 842, 804, 703; HRMS (MALDI-TOF) calcd for C<sub>17</sub>H<sub>22</sub>ClN<sub>2</sub>O<sub>2</sub>S<sub>2</sub> [M+H]<sup>+</sup> 385.0806; found 385.0792.

**Methyl 2-[1-[(morpholin-4-ylcarbonothioyl)thio]pentyl]-1,3-benzoxazole-5-carboxylate (3n):**

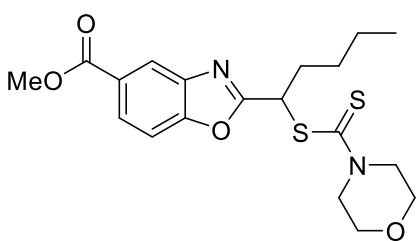

Prepared from iodotriazole **1d** (100.3 mg, 0.25 mmol) and morpholine (45.0  $\mu$ L, 0.50 mmol) according to the general procedure; eluent: PhH–MeCN = 20:1. Yield 59.5 mg (58%). Yellow oil; <sup>1</sup>H NMR (400 MHz, CDCl<sub>3</sub>)  $\delta$  8.41 [br d, *J* = 1.5 Hz, 1H, 4-CH(Ar)], 8.09 [dd, *J* = 8.6, 1.5 Hz, 1H, 6-CH(Ar)], 7.56 [d, *J* = 8.6 Hz, 1H, 7-CH(Ar)], 5.68 (dd, *J* = 8.1, 6.9 Hz, 1H, CHS), 4.32 (br s, 2H, CH<sub>2</sub>N), 3.96 (br s, 2H, CH<sub>2</sub>N), 3.95 (s, 3H, CH<sub>3</sub>O), 3.81–3.73 (m, 4H, CH<sub>2</sub>O), 2.35–2.14 (m, 2H, CH<sub>2</sub>Pr), 1.57–1.34 (m, 4H, CH<sub>2</sub>CH<sub>2</sub>Me), 0.90 (t, *J* = 7.1 Hz, 3H, CH<sub>2</sub>CH<sub>3</sub>); <sup>13</sup>C NMR (100 MHz, CDCl<sub>3</sub>)  $\delta$  194.4 (C=S), 167.2 (quat.), 166.5 (quat.), 153.5 [7a-C(Ar)], 141.1 [3a-C(Ar)], 127.0 [6-CH(Ar)], 126.8 [5-C(Ar)], 122.0 [4-CH(Ar)], 110.4 [7-CH(Ar)], 66.1 (br, 2C, CH<sub>2</sub>O), 52.3 (CH<sub>3</sub>O), 51.5 (br, CH<sub>2</sub>N), 50.5 (br, CH<sub>2</sub>N), 48.9 (CHS), 33.2, 29.2, 22.2, 13.8 (CH<sub>2</sub>CH<sub>3</sub>); IR (neat, cm<sup>-1</sup>)  $\nu$  2956, 2926, 2857, 1722 (C=O), 1620, 1566, 1464, 1435, 1422, 1296, 1285, 1267, 1229, 1215, 1113, 1082, 1030, 994, 908, 866, 843, 814, 768, 751; HRMS (MALDI-TOF) calcd for C<sub>19</sub>H<sub>25</sub>N<sub>2</sub>O<sub>4</sub>S<sub>2</sub> [M+H]<sup>+</sup> 409.1250; found 409.1261.

**1-(5,7-Dichloro-6-methyl-1,3-benzoxazol-2-yl)pentyl morpholine-4-carbodithioate (3o):**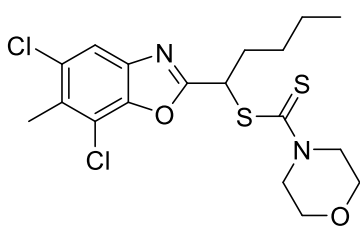

Prepared from iodotriazole **1e** (106.5 mg, 0.25 mmol) and morpholine (45.0  $\mu\text{L}$ , 0.50 mmol) according to the general procedure; eluent: hexanes–EtOAc = 7:1. Yield 43.9 mg (41%). Beige solid; mp 105–108  $^{\circ}\text{C}$ ;  $^1\text{H}$  NMR (400 MHz,  $\text{CDCl}_3$ )  $\delta$  7.64 [s, 1H, 4-CH(Ar)], 5.62 (dd,  $J = 8.0, 6.9$  Hz, 1H, CHS), 4.31 (br s, 2H,  $\text{CH}_2\text{N}$ ), 3.96 (br s, 2H,  $\text{CH}_2\text{N}$ ), 3.83–3.71 (m, 4H,  $\text{CH}_2\text{O}$ ), 2.55 [s, 3H,  $\text{CH}_3\text{C(Ar)}$ ], 2.31–2.13 (m, 2H,  $\text{CH}_2\text{Pr}$ ), 1.54–1.33 (m, 4H,  $\text{CH}_2\text{CH}_2\text{Me}$ ), 0.90 (t,  $J = 7.0$  Hz, 3H,  $\text{CH}_2\text{CH}_3$ );  $^{13}\text{C}$  NMR (100 MHz,  $\text{CDCl}_3$ )  $\delta$  194.3 (C=S), 166.9 [2-C(Ar)], 146.8 [7a-C(Ar)], 139.7 [3a-C(Ar)], 131.4 (quat.), 130.9 (quat.), 118.6 [4-CH(Ar)], 116.5 (quat.), 66.1 (br, 2C,  $\text{CH}_2\text{O}$ ), 51.5 (br,  $\text{CH}_2\text{N}$ ), 50.5 (br,  $\text{CH}_2\text{N}$ ), 48.9 (CHS), 33.3, 29.2, 22.2, 17.1 [ $\text{CH}_3\text{C(Ar)}$ ], 13.8 ( $\text{CH}_2\text{CH}_3$ ); IR (neat,  $\text{cm}^{-1}$ )  $\nu$  2958, 2925, 2858, 1561, 1463, 1421, 1384, 1300, 1268, 1229, 1214, 1188, 1114, 1030, 996, 951, 920, 863, 814, 774, 737; HRMS (MALDI-TOF) calcd for  $\text{C}_{18}\text{H}_{23}\text{Cl}_2\text{N}_2\text{O}_2\text{S}_2$   $[\text{M}+\text{H}]^+$  433.0573; found 433.0566.

**1-(7-Acetyl-1,3-benzoxazol-2-yl)pentyl morpholine-4-carbodithioate (3q):**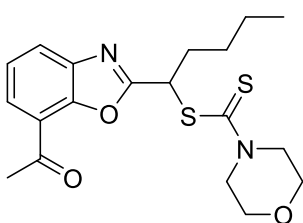

Prepared from iodotriazole **1g** (96.3 mg, 0.25 mmol) and morpholine (45.0  $\mu\text{L}$ , 0.50 mmol) according to the general procedure; eluent: hexanes–EtOAc = 3:1. Yield 47.8 mg (49%). Yellow oil;  $^1\text{H}$  NMR (400 MHz,  $\text{CDCl}_3$ )  $\delta$  7.93 [dd,  $J = 7.8, 1.2$  Hz, 1H, 4- or 6-CH(Ar)], 7.92 [dd,  $J = 7.8, 1.2$  Hz, 1H, 4- or 6-CH(Ar)], 7.42 [t,  $J = 7.8$  Hz, 1H, 5-CH(Ar)], 5.73 (dd,  $J = 8.0, 7.0$  Hz, 1H, CHS), 4.32 (br s, 2H,  $\text{CH}_2\text{N}$ ), 3.96 (br s, 2H,  $\text{CH}_2\text{N}$ ), 3.81–3.73 (m, 4H,  $\text{CH}_2\text{O}$ ), 2.84 (s, 3H, Ac), 2.38–2.18 (m, 2H,  $\text{CH}_2\text{Pr}$ ), 1.61–1.35 (m, 4H,  $\text{CH}_2\text{CH}_2\text{Me}$ ), 0.92 (t,  $J = 7.1$  Hz, 3H,  $\text{CH}_2\text{CH}_3$ );  $^{13}\text{C}$  NMR (100 MHz,  $\text{CDCl}_3$ )  $\delta$  194.7 (quat.), 194.3 (quat.), 166.5 [2-C(Ar)], 149.3 [7a-C(Ar)], 142.2 [3a-C(Ar)], 125.5, 125.1, 124.4, 121.8 [7-C(Ar)], 66.0 (br, 2C,  $\text{CH}_2\text{O}$ ), 51.5 (br,  $\text{CH}_2\text{N}$ ), 50.5 (br,  $\text{CH}_2\text{N}$ ), 48.8 (CHS), 33.1, 30.5 [ $\text{CH}_3\text{C(O)}$ ], 29.2, 22.2, 13.8 ( $\text{CH}_2\text{CH}_3$ ); IR (neat,  $\text{cm}^{-1}$ )  $\nu$  2957, 2925, 2856, 1687 (C=O), 1647, 1616, 1566, 1458, 1419, 1361, 1268, 1229, 1215, 1189, 1114, 1056, 1029, 994, 957, 863, 801, 748; HRMS (ESI-TOF) calcd for  $\text{C}_{19}\text{H}_{25}\text{N}_2\text{O}_3\text{S}_2$   $[\text{M}+\text{H}]^+$  393.1301; found 393.1306.

**1-(1,3-Benzoxazol-2-yl)-4-methylpentyl morpholine-4-carbodithioate (3r):**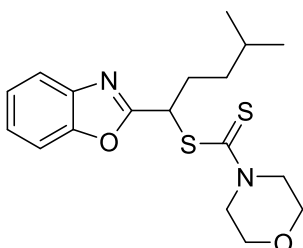

Prepared from iodotriazole **1h** (89.3 mg, 0.25 mmol) and morpholine (45.0  $\mu\text{L}$ , 0.50 mmol) according to the general procedure; eluent: hexanes–EtOAc = 3:1. Yield 49 mg (54%). White solid; mp 84–86  $^{\circ}\text{C}$ ;  $^1\text{H}$  NMR (400 MHz,  $\text{CDCl}_3$ )  $\delta$  7.72 [m, 1H, 4-CH(Ar)], 7.53 [m, 1H, 7-CH(Ar)], 7.36–7.29 [m, 2H, 5,6-CH(Ar)], 5.65 (dd,  $J = 8.1, 6.8$  Hz,

1H, CHS), 4.31 (br s, 2H, CH<sub>2</sub>N), 3.96 (br s, 2H, CH<sub>2</sub>N), 3.82–3.71 (m, 4H, CH<sub>2</sub>O), 2.36–2.14 (m, 2H, CH<sub>2</sub>*i*-Bu), 1.62 (nonet, *J* = 6.6 Hz, 1H, CHMe<sub>2</sub>), 1.42 (m, 1H, CH<sub>2</sub>*i*-Pr), 1.30 (m, 1H, CH<sub>2</sub>*i*-Pr), 0.89 (d, *J* = 6.6 Hz, 3H, 2CH<sub>3</sub>); <sup>13</sup>C NMR (100 MHz, CDCl<sub>3</sub>) δ 194.7 (C=S), 165.7 [2-C(Ar)], 150.6 [7a-C(Ar)], 141.0 [3a-C(Ar)], 125.0 [5- or 6-CH(Ar)], 124.3 [5- or 6-CH(Ar)], 120.1 [4-CH(Ar)], 110.6 [7-CH(Ar)], 66.1 (br, 2C, CH<sub>2</sub>O), 51.5 (br, CH<sub>2</sub>N), 50.5 (br, CH<sub>2</sub>N), 49.2 (CHS), 36.1, 31.7, 27.8, 22.4 (2CH<sub>3</sub>); IR (neat, cm<sup>-1</sup>) ν 2957, 2924, 2854, 1610, 1560, 1454, 1419, 1267, 1227, 1214, 1112, 1029, 994, 763, 749; HRMS (MALDI-TOF) calcd for C<sub>18</sub>H<sub>25</sub>N<sub>2</sub>O<sub>2</sub>S<sub>2</sub> [M+H]<sup>+</sup> 365.1352; found 365.1339.

### 1-(1,3-Benzoxazol-2-yl)-2-cyclohexylethyl morpholine-4-carbodithioate (3s):

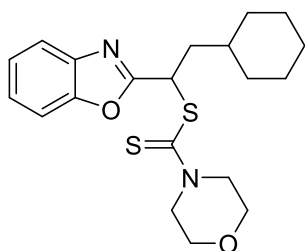

Prepared from iodotriazole **1i** (95.8 mg, 0.25 mmol) and morpholine (45.0 μL, 0.50 mmol) according to the general procedure; eluent: hexanes–EtOAc = 4:1. Yield 54.7 mg (56%). White solid; mp 86–88 °C; <sup>1</sup>H NMR (400 MHz, CDCl<sub>3</sub>) δ 7.72 [m, 1H, 4-CH(Ar)], 7.53 [m, 1H, 7-CH(Ar)], 7.37–7.29 [m, 2H, 5,6-CH(Ar)], 5.77 (dd, *J* = 8.9, 7.2

Hz, 1H, CHS), 4.31 (br s, 2H, CH<sub>2</sub>N), 3.95 (br s, 2H, CH<sub>2</sub>N), 3.82–3.68 (m, 4H, CH<sub>2</sub>O), 2.21 (ddd, *J* = 13.8, 8.9, 6.4 Hz, 1H, CH<sub>2</sub>Cy), 2.04 (dt, *J* = 13.8, 7.2 Hz, 1H, CH<sub>2</sub>Cy), 1.92 (m, 1H), 1.81–1.57 (m, 4H), 1.39 (m, 1H), 1.29–1.11 (m, 3H), 1.09–0.92 (m, 2H); <sup>13</sup>C NMR (100 MHz, CDCl<sub>3</sub>) δ 194.6 (C=S), 166.0 [2-C(Ar)], 150.6 [7a-C(Ar)], 141.1 [3a-C(Ar)], 125.0 [5- or 6-CH(Ar)], 124.3 [5- or 6-CH(Ar)], 120.1 [4-CH(Ar)], 110.7 [7-CH(Ar)], 66.0 (br, 2C, CH<sub>2</sub>O), 51.5 (br, CH<sub>2</sub>N), 50.4 (br, CH<sub>2</sub>N), 46.9 (CHS), 41.1, 35.4, 33.2, 32.6, 26.3, 25.9 (2C); IR (neat, cm<sup>-1</sup>) ν 2922, 2851, 1610, 1563, 1454, 1420, 1267, 1229, 1215, 1115, 1030, 996, 762, 747; HRMS (MALDI-TOF) calcd for C<sub>20</sub>H<sub>27</sub>N<sub>2</sub>O<sub>2</sub>S<sub>2</sub> [M+H]<sup>+</sup> 391.1508; found 391.1497.

### 1-(1,3-Benzoxazol-2-yl)-3-phenylpropyl morpholine-4-carbodithioate (3t):

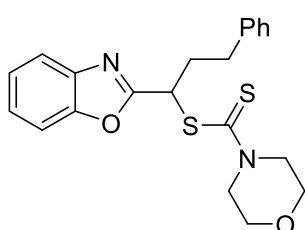

Prepared from iodotriazole **1j** (97.8 mg, 0.25 mmol) and morpholine (45.0 μL, 0.50 mmol) according to the general procedure; eluent: PhH–MeCN = 20:1. Yield 65.7 mg (66%). Yellow oil; <sup>1</sup>H NMR (400 MHz, CDCl<sub>3</sub>) δ 7.73 [m, 1H, 4-CH(Ar)], 7.52 [m, 1H, 7-CH(Ar)], 7.37–7.29 [m, 2H, 5,6-CH(Ar)], 7.25 [m, 2H, 3,5-CH(Ph)], 7.19 [m, 2H, 2,6-

CH(Ph)], 7.16 [m, 1H, 4-CH(Ph)], 5.75 (dd, *J* = 8.1, 6.7 Hz, 1H, CHS), 4.31 (br s, 2H, CH<sub>2</sub>N), 3.94 (br s, 2H, CH<sub>2</sub>N), 3.82–3.68 (m, 4H, CH<sub>2</sub>O), 2.91–2.73 (m, 2H), 2.68–2.46 (m, 2H); <sup>13</sup>C NMR (100 MHz, CDCl<sub>3</sub>) δ 194.2 (C=S), 165.1 [2-C(Ar)], 150.6 [7a-C(Ar)], 141.0 (quat.), 140.4 (quat.), 128.4 [2C, CH(Ph)], 128.3 [2C, CH(Ph)], 126.1, 125.1, 124.4, 120.1 [4-CH(Ar)], 110.6 [7-CH(Ar)], 66.1 (br, 2C, CH<sub>2</sub>O), 51.5 (br, CH<sub>2</sub>N), 50.4 (br, CH<sub>2</sub>N), 48.7 (CHS), 35.4, 33.4; IR (neat, cm<sup>-1</sup>) ν 2964, 2923, 2856, 1610, 1563, 1496, 1455, 1421, 1300, 1268, 1231, 1215, 1115,

1030, 995, 933, 909, 865, 835, 749, 701; HRMS (MALDI-TOF) calcd for C<sub>21</sub>H<sub>23</sub>N<sub>2</sub>O<sub>2</sub>S<sub>2</sub> [M+H]<sup>+</sup> 399.1195; found 399.1189.

**Methyl 5-(1,3-benzoxazol-2-yl)-5-[(morpholin-4-ylcarbonothioyl)thio]pentanoate (3u):**

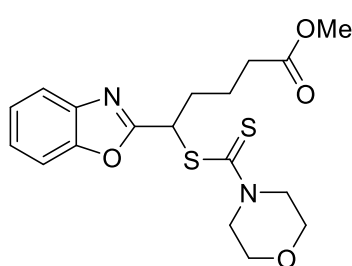

Prepared from iodotriazole **1k** (96.8 mg, 0.25 mmol) and morpholine (45.0  $\mu$ L, 0.50 mmol) according to the general procedure; eluent: hexanes–EtOAc = 3:1. Yield 52.7 mg (53%). Yellow oil; <sup>1</sup>H NMR (400 MHz, CDCl<sub>3</sub>)  $\delta$  7.71 [m, 1H, 4-CH(Ar)], 7.52 [m, 1H, 7-CH(Ar)], 7.37–7.30 [m, 2H, 5,6-CH(Ar)], 5.74 (dd,  $J$  = 8.0, 6.8 Hz, 1H, CHS), 4.33 (br s, 2H, CH<sub>2</sub>N), 3.95 (br s, 2H, CH<sub>2</sub>N), 3.82–3.71 (m, 4H, CH<sub>2</sub>O), 3.65 (s, 3H, CH<sub>3</sub>O), 2.42 [t,  $J$  = 7.5 Hz, 2H, CH<sub>2</sub>C(O)], 2.39–2.20 (m, 2H, CH<sub>2</sub>CHS), 1.94–1.75 [m, 2H, CH<sub>2</sub>CH<sub>2</sub>C(O)]; <sup>13</sup>C NMR (100 MHz, CDCl<sub>3</sub>)  $\delta$  194.3 (C=S), 173.3 (C=O), 165.0 [2-C(Ar)], 150.7 [7a-C(Ar)], 140.9 [3a-C(Ar)], 125.2 [5- or 6-CH(Ar)], 124.4 [5- or 6-CH(Ar)], 120.0 [4-CH(Ar)], 110.7 [7-CH(Ar)], 66.2 (br, 2C, CH<sub>2</sub>O), 51.8 (br, CH<sub>2</sub>N), 51.5 (CH<sub>3</sub>O), 50.6 (br, CH<sub>2</sub>N), 48.5 (CHS), 33.3, 33.0, 22.3; IR (neat, cm<sup>-1</sup>)  $\nu$  2950, 2923, 2854, 1735 (C=O), 1610, 1563, 1455, 1422, 1268, 1231, 1215, 1195, 1174, 1145, 1114, 1029, 995, 763, 750; HRMS (MALDI-TOF) calcd for C<sub>18</sub>H<sub>23</sub>N<sub>2</sub>O<sub>4</sub>S<sub>2</sub> [M+H]<sup>+</sup> 395.1094; found 395.1100.

**1-(1,3-Benzoxazol-2-yl)-3-hydroxypropyl morpholine-4-carbodithioate (3v):**

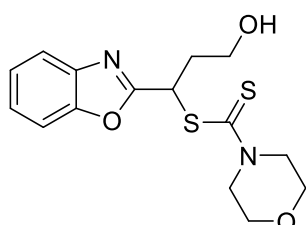

Prepared from iodotriazole **1l** (66.2 mg, 0.20 mmol) and morpholine (36.0  $\mu$ L, 0.50 mmol) according to the general procedure; eluent: hexanes–EtOAc = 1:1. Yield 55.0 mg (81%). Yellow oil; <sup>1</sup>H NMR (400 MHz, CDCl<sub>3</sub>)  $\delta$  7.70 [m, 1H, 4-CH(Ar)], 7.52 [m, 1H, 7-CH(Ar)], 7.38–7.30 [m, 2H, 5,6-CH(Ar)], 6.00 (dd,  $J$  = 7.8, 6.7 Hz, 1H, CHS), 4.35 (br s, 2H, CH<sub>2</sub>N), 3.96 (br s, 2H, CH<sub>2</sub>N), 3.92–3.68 (m, 6H, 3 $\times$ CH<sub>2</sub>O), 3.08 (br s, 1H, OH), 2.60 (m, 1H, CH<sub>2</sub>CHS), 2.42 (m, 1H, CH<sub>2</sub>CHS); <sup>13</sup>C NMR (100 MHz, CDCl<sub>3</sub>)  $\delta$  194.6 (C=S), 165.2 [2-C(Ar)], 150.6 [7a-C(Ar)], 140.7 [3a-C(Ar)], 125.3 [5- or 6-CH(Ar)], 124.5 [5- or 6-CH(Ar)], 119.9 [4-CH(Ar)], 110.7 [7-CH(Ar)], 66.3 (br, OCH<sub>2</sub>CH<sub>2</sub>N), 65.9 (br, OCH<sub>2</sub>CH<sub>2</sub>N), 59.2 (CH<sub>2</sub>OH), 52.1 (br, CH<sub>2</sub>N), 50.6 (br, CH<sub>2</sub>N), 46.6 (CHS), 36.2 (CH<sub>2</sub>CHS); IR (neat, cm<sup>-1</sup>)  $\nu$  3401 (O–H), 2958, 2922, 2854, 1610, 1561, 1455, 1421, 1267, 1229, 1215, 1112, 1063, 1028, 993, 867, 763, 748; HRMS (MALDI-TOF) calcd for C<sub>15</sub>H<sub>19</sub>N<sub>2</sub>O<sub>3</sub>S<sub>2</sub> [M+H]<sup>+</sup> 339.0832; found 339.0829.

## Synthesis of thiolated anthranilamides **11**

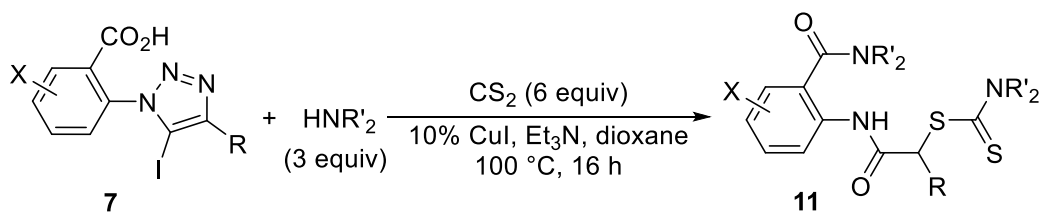

**General procedure.** In a vial with a screw cap iodotriazole **7** (0.25 mmol), secondary amine (0.75 mmol, 3 equiv),  $\text{CuI}$  (4.8 mg, 0.025 mmol, 10 mol %),  $\text{CS}_2$  (90.5  $\mu\text{L}$ , 1.50 mmol, 6 equiv), and  $\text{Et}_3\text{N}$  (70  $\mu\text{L}$ , 0.50 mmol, 2 equiv) were mixed under an Ar atmosphere in dioxane (2.5 mL). The reaction mixture was stirred at  $100^\circ\text{C}$  for 16 h, then diluted with  $\text{CH}_2\text{Cl}_2$  (20 mL), and washed with water (20 mL). The organic layer was dried with anhydrous  $\text{Na}_2\text{SO}_4$ , and the solvents were evaporated *in vacuo*. The residue was purified by column chromatography.

### 1-([2-(Morpholin-4-ylcarbonyl)phenyl]amino)carbonyl)pentyl morpholine-4-carbodithioate (**11a**):

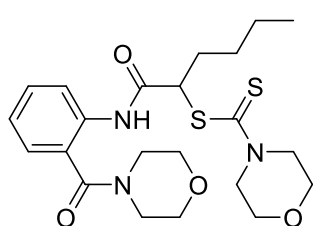

Prepared from iodotriazole **7a** (92.8 mg, 0.25 mmol) and morpholine (67.5  $\mu\text{L}$ , 0.75 mmol) according to the general procedure; eluent: hexanes– $\text{EtOAc}$  = 1:1. Yield 90.1 mg (77%). Yellow oil;  $^1\text{H}$  NMR (400 MHz,  $\text{CDCl}_3$ )  $\delta$  9.27 (br s, 1H, NH), 8.19 [br d,  $J$  = 8.1 Hz, 1H, 6-CH(Ar)], 7.39 [m, 1H, 5-CH(Ar)], 7.18 [br d,  $J$  = 7.3 Hz, 1H, 3-CH(Ar)], 7.11 [m, 1H, 4-CH(Ar)], 4.77 (t,  $J$  = 7.2 Hz, 1H, CHS), 4.30 (br s, 2H), 3.97 (br s, 2H), 3.88–3.33 (m, 12H), 2.17 (m, 1H,  $\text{CH}_2\text{Pr}$ ), 1.93 (m, 1H,  $\text{CH}_2\text{Pr}$ ), 1.57–1.32 (m, 4H,  $\text{CH}_2\text{CH}_2\text{Me}$ ), 0.92 (t,  $J$  = 7.1 Hz, 3H,  $\text{CH}_3$ );  $^{13}\text{C}$  NMR (100 MHz,  $\text{CDCl}_3$ )  $\delta$  195.6 (C=S), 169.7 (C=O), 168.5 (C=O), 135.8 [1-C(Ar)], 130.5, 127.0, 125.2 [2-C(Ar)], 123.7, 122.9, 66.7 (br, 2C,  $\text{CH}_2\text{O}$ ), 66.3 (br,  $\text{CH}_2\text{O}$ ), 66.0 (br,  $\text{CH}_2\text{O}$ ), 55.1 (CHS), 51.6 (br,  $\text{CH}_2\text{N}$ ), 50.6 (br,  $\text{CH}_2\text{N}$ ), 48.3 (br,  $\text{CH}_2\text{N}$ ), 42.3 (br,  $\text{CH}_2\text{N}$ ), 30.4, 29.4, 22.4, 13.8 ( $\text{CH}_3$ ); IR (neat,  $\text{cm}^{-1}$ )  $\nu$  3304 (N–H), 2958, 2925, 2856, 1691 (C=O), 1629, 1599, 1585, 1518, 1460, 1444, 1424, 1300, 1268, 1230, 1114, 1020, 996, 760; HRMS (MALDI-TOF) calcd for  $\text{C}_{22}\text{H}_{31}\text{N}_3\text{NaO}_4\text{S}_2$  [ $\text{M}+\text{Na}$ ] $^+$  488.1648; found 488.1650.

### 1-([2-(Piperidin-4-ylcarbonyl)phenyl]amino)carbonyl)pentyl piperidine-4-carbodithioate (**11b**):

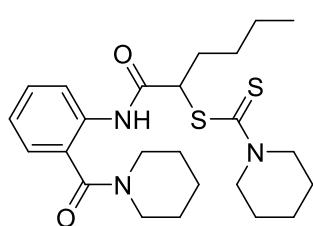

Prepared from iodotriazole **7a** (92.8 mg, 0.25 mmol) and piperidine (74.1  $\mu\text{L}$ , 0.75 mmol) according to the general procedure; eluent: hexanes– $\text{EtOAc}$  = 3:1. Yield 87.3 mg (76%). Brown oil;  $^1\text{H}$  NMR (400 MHz,  $\text{CDCl}_3$ )  $\delta$  9.22 (br s, 1H, NH), 8.22 [br d,  $J$  = 8.1 Hz, 1H, 6-CH(Ar)], 7.35 [m, 1H, 5-CH(Ar)], 7.18 [br d,  $J$  = 7.2 Hz, 1H, 3-

CH(Ar)], 7.08 [m, 1H, 4-CH(Ar)], 4.80 (t,  $J = 7.2$  Hz, 1H, CHS), 4.34 (m, 1H), 4.16 (m, 1H), 3.95 (m, 1H), 3.86 (m, 1H), 3.72 (br s, 2H), 3.31 (br s, 2H), 2.15 (m, 1H,  $CH_2Pr$ ), 1.92 (m, 1H,  $CH_2Pr$ ), 1.77–1.61 (m, 10H), 1.56–1.32 (m, 6H), 0.91 (t,  $J = 7.1$  Hz, 3H,  $CH_3$ );  $^{13}C$  NMR (100 MHz,  $CDCl_3$ )  $\delta$  193.3 (C=S), 169.8 (C=O), 168.0 (C=O), 135.2 [1-C(Ar)], 129.7, 126.6, 126.4 [2-C(Ar)], 123.4, 122.4, 55.1 (CHS), 53.1 (br,  $CH_2N$ ), 51.4 (br,  $CH_2N$ ), 48.5 (br,  $CH_2N$ ), 42.8 (br,  $CH_2N$ ), 30.4, 29.2, 26.3 (br), 25.7 (br), 25.3 (br), 25.2 (br), 24.3, 23.9, 22.2, 13.6 ( $CH_3$ ); IR (neat,  $cm^{-1}$ )  $\nu$  3299 (N–H), 2935, 2856, 1692 (C=O), 1627, 1597, 1585, 1519, 1477, 1430, 1351, 1272, 1259, 1242, 1228, 1163, 1129, 1113, 1002, 977, 890, 853, 759; HRMS (MALDI-TOF) calcd for  $C_{24}H_{35}KN_3O_2S_2$  [ $M+K$ ] $^+$  500.1802; found 500.1811.

**1-([2-(Pyrrolidin-4-ylcarbonyl)phenyl]amino)carbonyl)pentyl pyrrolidine-4-carbodithioate (11c):**

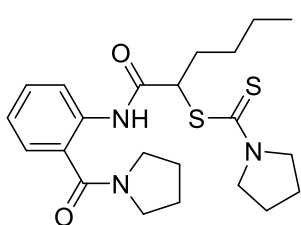

Prepared from iodotriazole **7a** (92.8 mg, 0.25 mmol) and pyrrolidine (62.6  $\mu$ L, 0.75 mmol) according to the general procedure; eluent: hexanes–EtOAc = 1:1. Yield 93.6 mg (86%). Brown oil;  $^1H$  NMR (600 MHz,  $CDCl_3$ )  $\delta$  9.61 (br s, 1H, NH), 8.24 [br d,  $J = 8.2$  Hz, 1H, 6-CH(Ar)], 7.36 [m, 1H, 5-CH(Ar)], 7.28 [br d,  $J = 7.3$  Hz, 1H, 3-CH(Ar)], 7.09 [m, 1H, 4-CH(Ar)], 4.75 (t,  $J = 7.1$  Hz, 1H, CHS), 3.97–3.58 (m, 6H, 4H  $CH_2NCS$  + 2H  $CH_2NCO$ ), 3.40–3.31 (m, 2H,  $CH_2NCO$ ), 2.18–2.04 (m, 3H), 2.02–1.83 (m, 7H), 1.55–1.32 (m, 4H,  $CH_2CH_2Me$ ), 0.91 (t,  $J = 7.1$  Hz, 3H,  $CH_3$ );  $^{13}C$  NMR (151 MHz,  $CDCl_3$ )  $\delta$  190.4 (br, C=S), 169.7 [C(O)NH], 167.8 [C(O)C(Ar)], 135.1 [1-C(Ar)], 129.9 [5-CH(Ar)], 126.8 [2-C(Ar)], 126.6 [3-CH(Ar)], 123.2 [4-CH(Ar)], 122.0 [6-CH(Ar)], 54.9 (br,  $CH_2NCS$ ), 54.5 (CHS), 50.5 (br,  $CH_2NCS$ ), 49.2 ( $CH_2NCO$ ), 45.7 ( $CH_2NCO$ ), 30.2 ( $CH_2Pr$ ), 29.1 ( $CH_2Et$ ), 25.9, 25.8, 24.2, 23.9, 22.1 ( $CH_2Me$ ), 13.6 ( $CH_3$ ); IR (neat,  $cm^{-1}$ )  $\nu$  3282 (N–H), 2955, 2928, 2872, 1690 (C=O), 1624, 1595, 1519, 1462, 1435, 1338, 1295, 1251, 1182, 1160, 1006, 956, 759, 733; HRMS (ESI-TOF) calcd for  $C_{22}H_{32}N_3O_2S_2$  [ $M+H$ ] $^+$  434.1930; found 434.1934.

**1-([2-(Thiomorpholin-4-ylcarbonyl)phenyl]amino)carbonyl)pentyl thiomorpholine-4-carbodithioate (11d):**

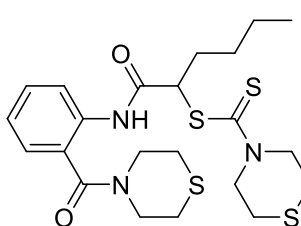

Prepared from iodotriazole **7a** (92.8 mg, 0.25 mmol) and thiomorpholine (75.5  $\mu$ L, 0.75 mmol) according to the general procedure; eluent: hexanes–EtOAc = 2:1. Yield 96.2 mg (77%). Yellow oil;  $^1H$  NMR (400 MHz,  $CDCl_3$ )  $\delta$  9.16 (br s, 1H, NH), 8.19 [br d,  $J = 8.2$  Hz, 1H, 6-CH(Ar)], 7.39 [m, 1H, 5-CH(Ar)], 7.16 [br d,  $J = 7.5$  Hz, 1H, 3-CH(Ar)], 7.11 [m, 1H, 4-CH(Ar)], 4.76 (t,  $J = 7.4$  Hz, 1H, CHS), 4.74 (br s, 1H), 4.52–4.30 (m, 2H), 4.19 (br s, 1H), 4.11–3.87 (m, 2H), 3.65 (br s, 2H), 2.88–2.45 (m, 8H,

4×CH<sub>2</sub>S), 2.16 (m, 1H, CH<sub>2</sub>Pr), 1.94 (m, 1H, CH<sub>2</sub>Pr), 1.56–1.33 (m, 4H, CH<sub>2</sub>CH<sub>2</sub>Me), 0.92 (t, *J* = 7.1 Hz, 3H, CH<sub>3</sub>); <sup>13</sup>C NMR (100 MHz, CDCl<sub>3</sub>) δ 194.7 (C=S), 169.6 (C=O), 168.8 (C=O), 135.5 [1-C(Ar)], 130.3, 126.7, 125.7 [2-C(Ar)], 123.8, 123.0, 55.2 (CHS), 54.8 (br, CH<sub>2</sub>N), 53.4 (br, CH<sub>2</sub>N), 50.1 (br, CH<sub>2</sub>N), 44.4 (br, CH<sub>2</sub>N), 30.4, 29.3, 27.9 (br, CH<sub>2</sub>S), 27.2 (3C, br, CH<sub>2</sub>S), 22.3, 13.7 (CH<sub>3</sub>); IR (neat, cm<sup>-1</sup>) ν 3305 (N–H), 2954, 2921, 2858, 1690 (C=O), 1628, 1598, 1584, 1517, 1467, 1443, 1418, 1356, 1283, 1259, 1247, 1215, 1191, 1162, 1142, 1027, 1005, 951, 936, 758, 733; HRMS (MALDI-TOF) calcd for C<sub>22</sub>H<sub>31</sub>N<sub>3</sub>NaO<sub>2</sub>S<sub>4</sub> [M+Na]<sup>+</sup> 520.1191; found 520.1184.

**1-([4-Bromo-2-(pyrrolidin-1-ylcarbonyl)phenyl]amino)carbonyl)pentyl pyrrolidine-1-carbodithioate (11e):**

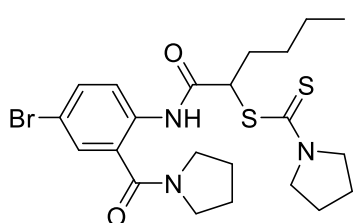

Prepared from iodotriazole **7b** (112.5 mg, 0.25 mmol) and pyrrolidine (62.6 μL, 0.75 mmol) according to the general procedure; eluent: hexanes–EtOAc = 2:1. Yield 100.8 mg (79%).

Brown oil; <sup>1</sup>H NMR (400 MHz, CDCl<sub>3</sub>) δ 9.53 (br s, 1H, NH), 8.18 [d, *J* = 8.8 Hz, 1H, 6-CH(Ar)], 7.46 [dd, *J* = 8.8, 2.1 Hz, 1H, 5-CH(Ar)], 7.41 [d, *J* = 2.1 Hz, 1H, 3-CH(Ar)], 4.74 (t, *J* = 7.4 Hz, 1H, CHS), 3.95–3.82 (m, 2H), 3.78–3.57 (m, 4H), 3.41–3.3 (m, 2H), 2.19–1.84 (m, 10H), 1.55–1.31 (m, 4H, CH<sub>2</sub>CH<sub>2</sub>Me), 0.90 (t, *J* = 7.1 Hz, 3H, CH<sub>3</sub>); <sup>13</sup>C NMR (100 MHz, CDCl<sub>3</sub>) δ 190.7 (C=S), 170.0 (C=O), 166.3 (C=O), 134.5 [1-C(Ar)], 132.8, 129.5, 128.7 [2-C(Ar)], 123.8, 115.9 (CBr), 55.2, 54.5, 50.7, 49.3, 46.0, 30.2, 29.2, 26.0, 25.9, 24.3, 24.1, 22.3, 13.7 (CH<sub>3</sub>); IR (neat, cm<sup>-1</sup>) ν 3272 (N–H), 2955, 2926, 2872, 1692 (C=O), 1626, 1592, 1576, 1507, 1462, 1436, 1385, 1338, 1291, 1250, 1183, 1160, 1006, 956, 825, 733; HRMS (MALDI-TOF) calcd for C<sub>22</sub>H<sub>30</sub>BrKN<sub>3</sub>O<sub>2</sub>S<sub>2</sub> [M+K]<sup>+</sup> 550.0594; found 550.0599.



## Copies of NMR spectra

### 2-[5-Iodo-4-(2-phenylethyl)-1H-1,2,3-triazol-1-yl]phenyl acetate (S1j)

$^1\text{H}$  NMR (400 MHz,  $\text{CDCl}_3$ )

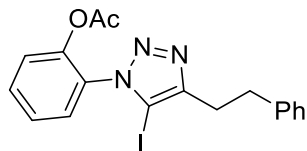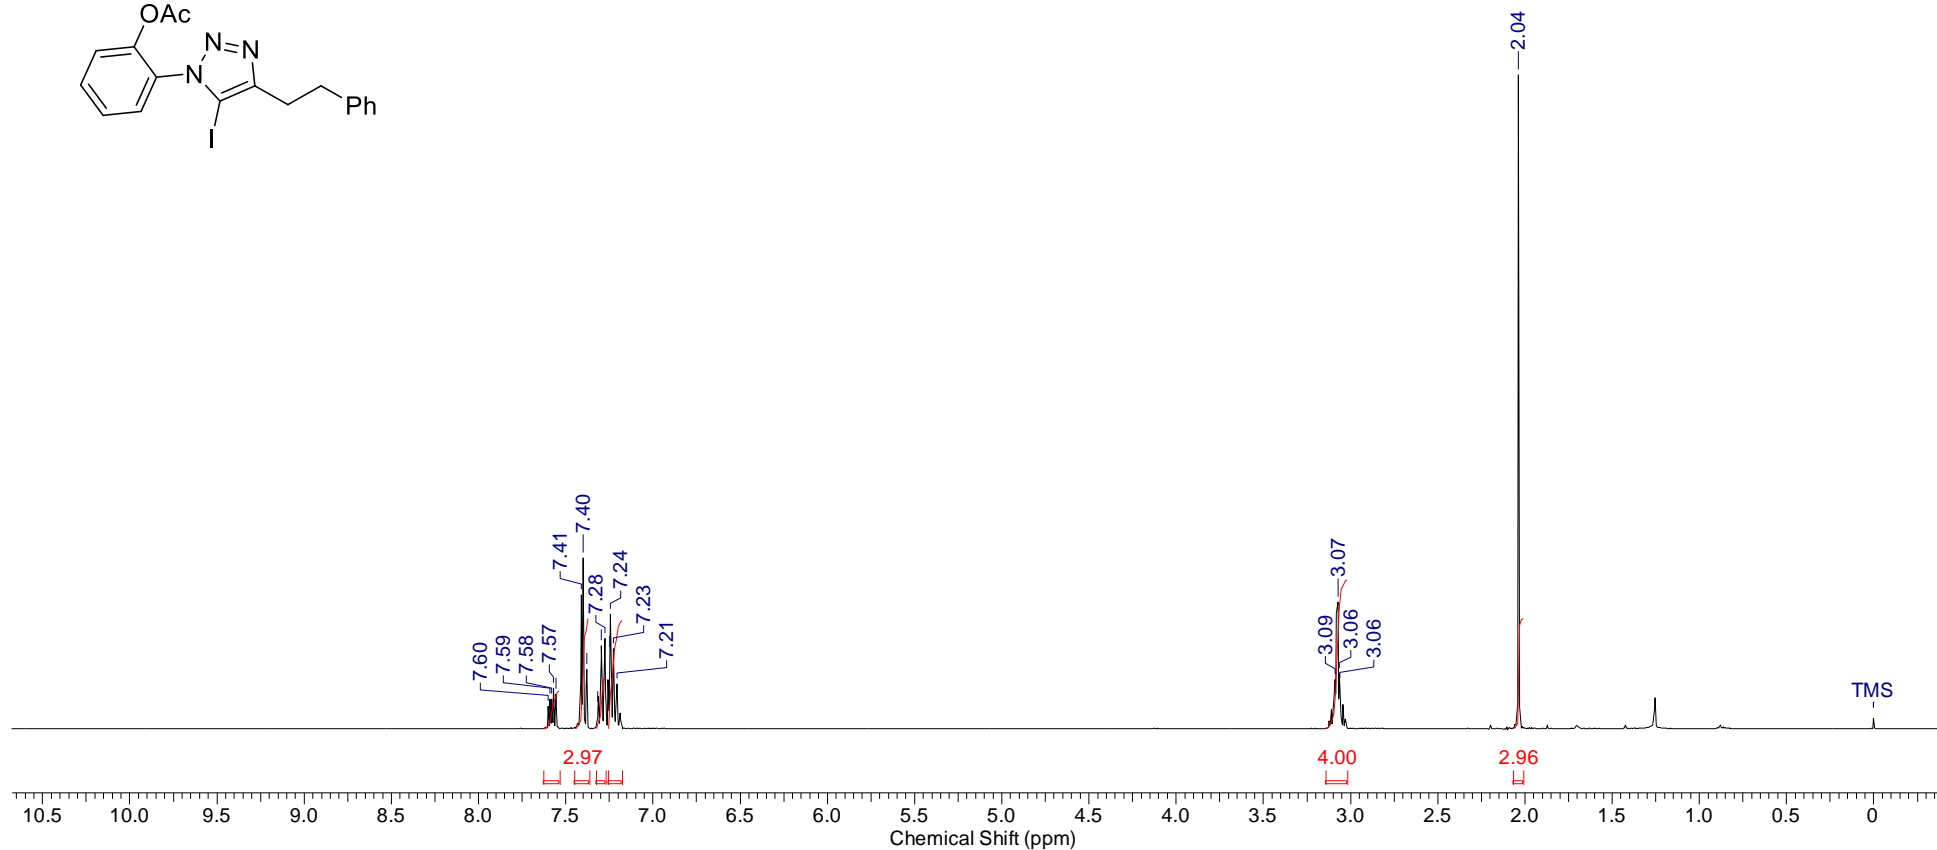

2-[5-Iodo-4-(2-phenylethyl)-1H-1,2,3-triazol-1-yl]phenyl acetate (S1j)

$^{13}\text{C}$  NMR (100 MHz,  $\text{CDCl}_3$ )

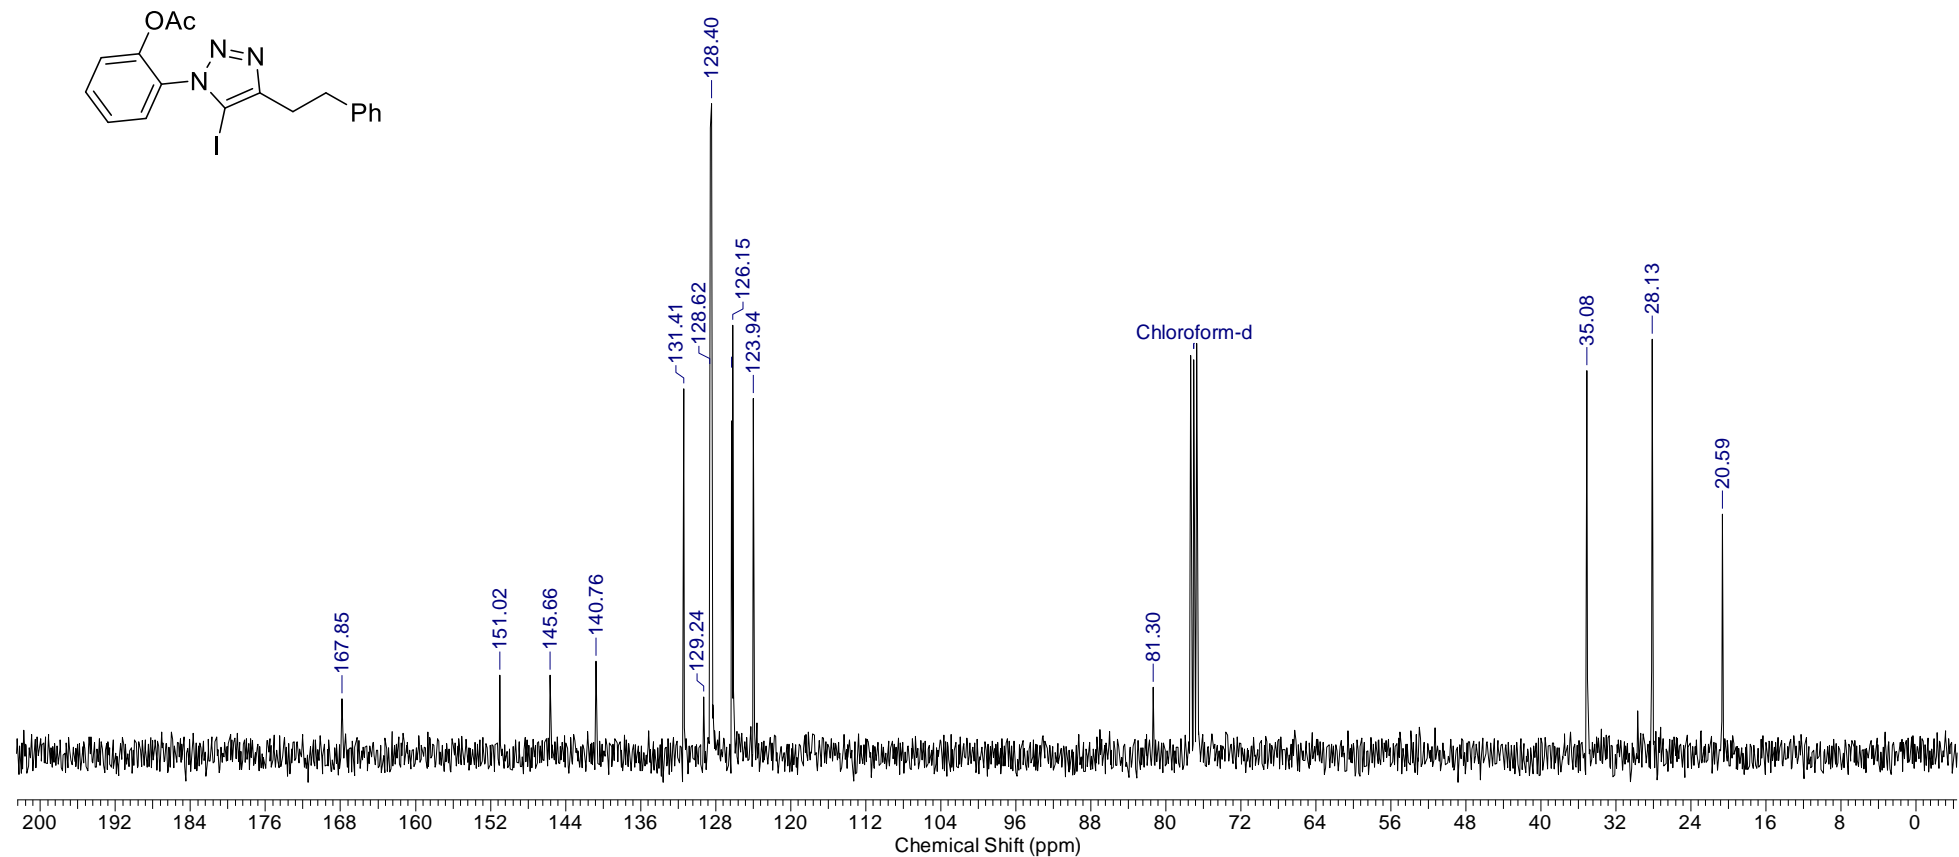

2-[5-Iodo-4-(2-phenylethyl)-1H-1,2,3-triazol-1-yl]phenol (1j)

<sup>1</sup>H NMR (400 MHz, CDCl<sub>3</sub>-CD<sub>3</sub>OD)

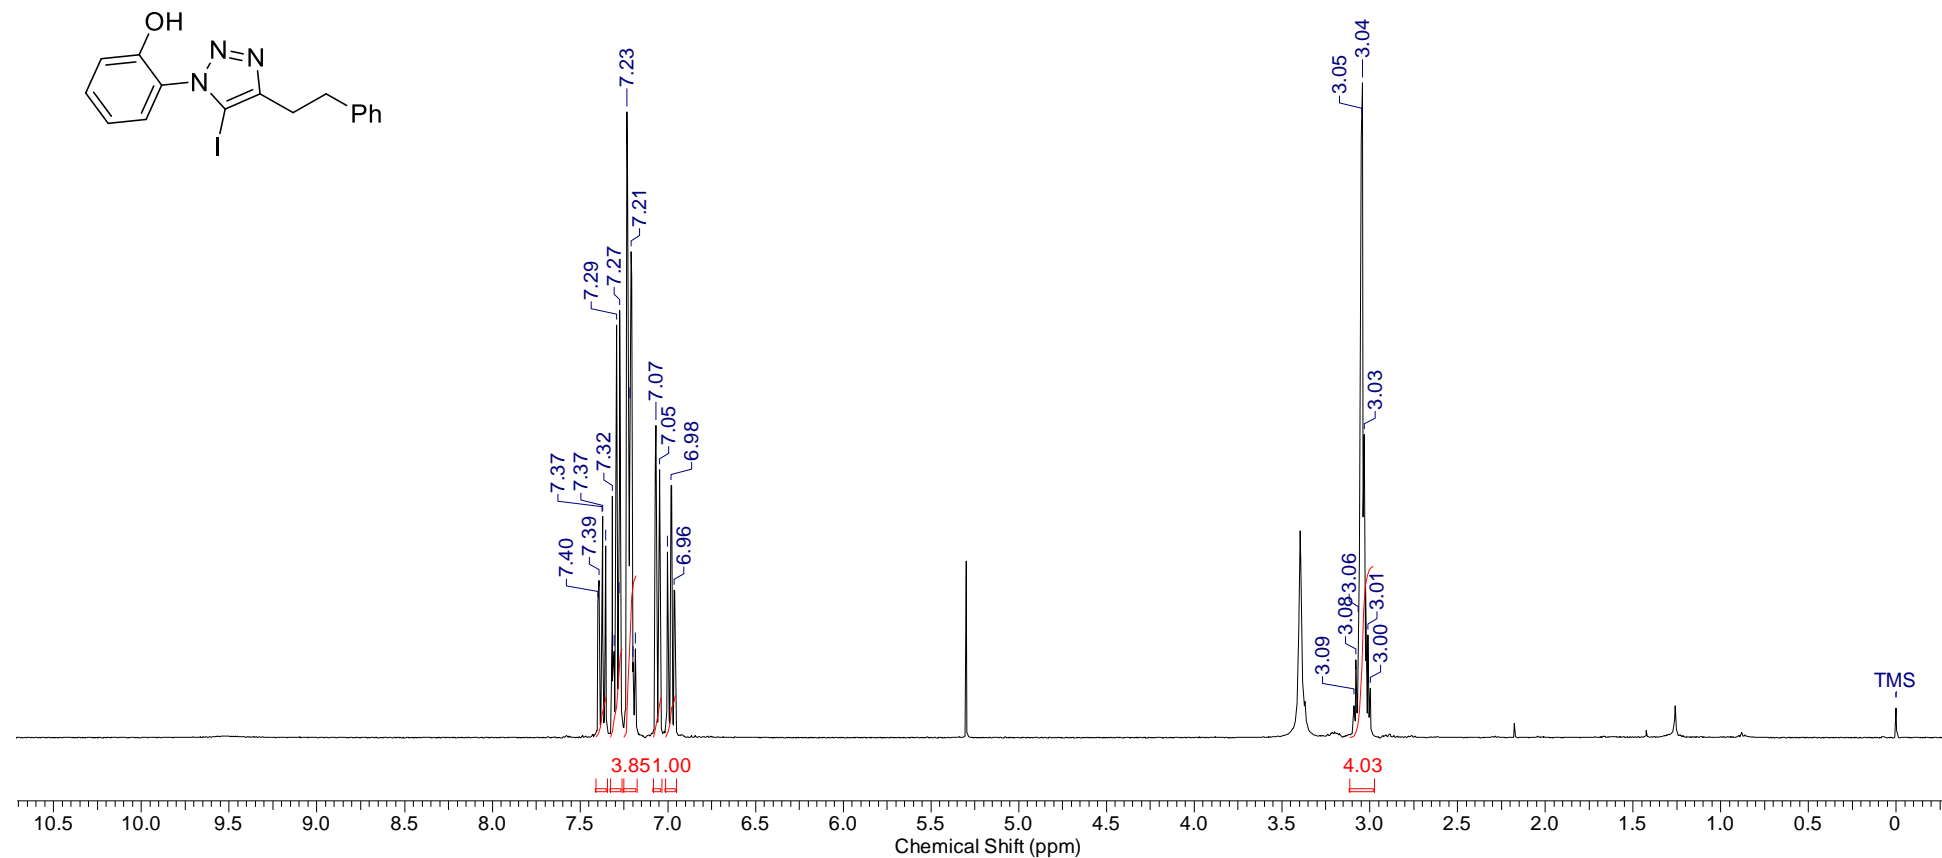

2-[5-Iodo-4-(2-phenylethyl)-1H-1,2,3-triazol-1-yl]phenol (1j)

$^{13}\text{C}$  NMR (100 MHz,  $\text{CDCl}_3\text{-CD}_3\text{OD}$ )

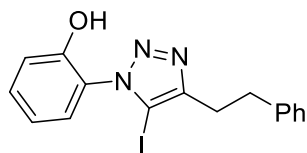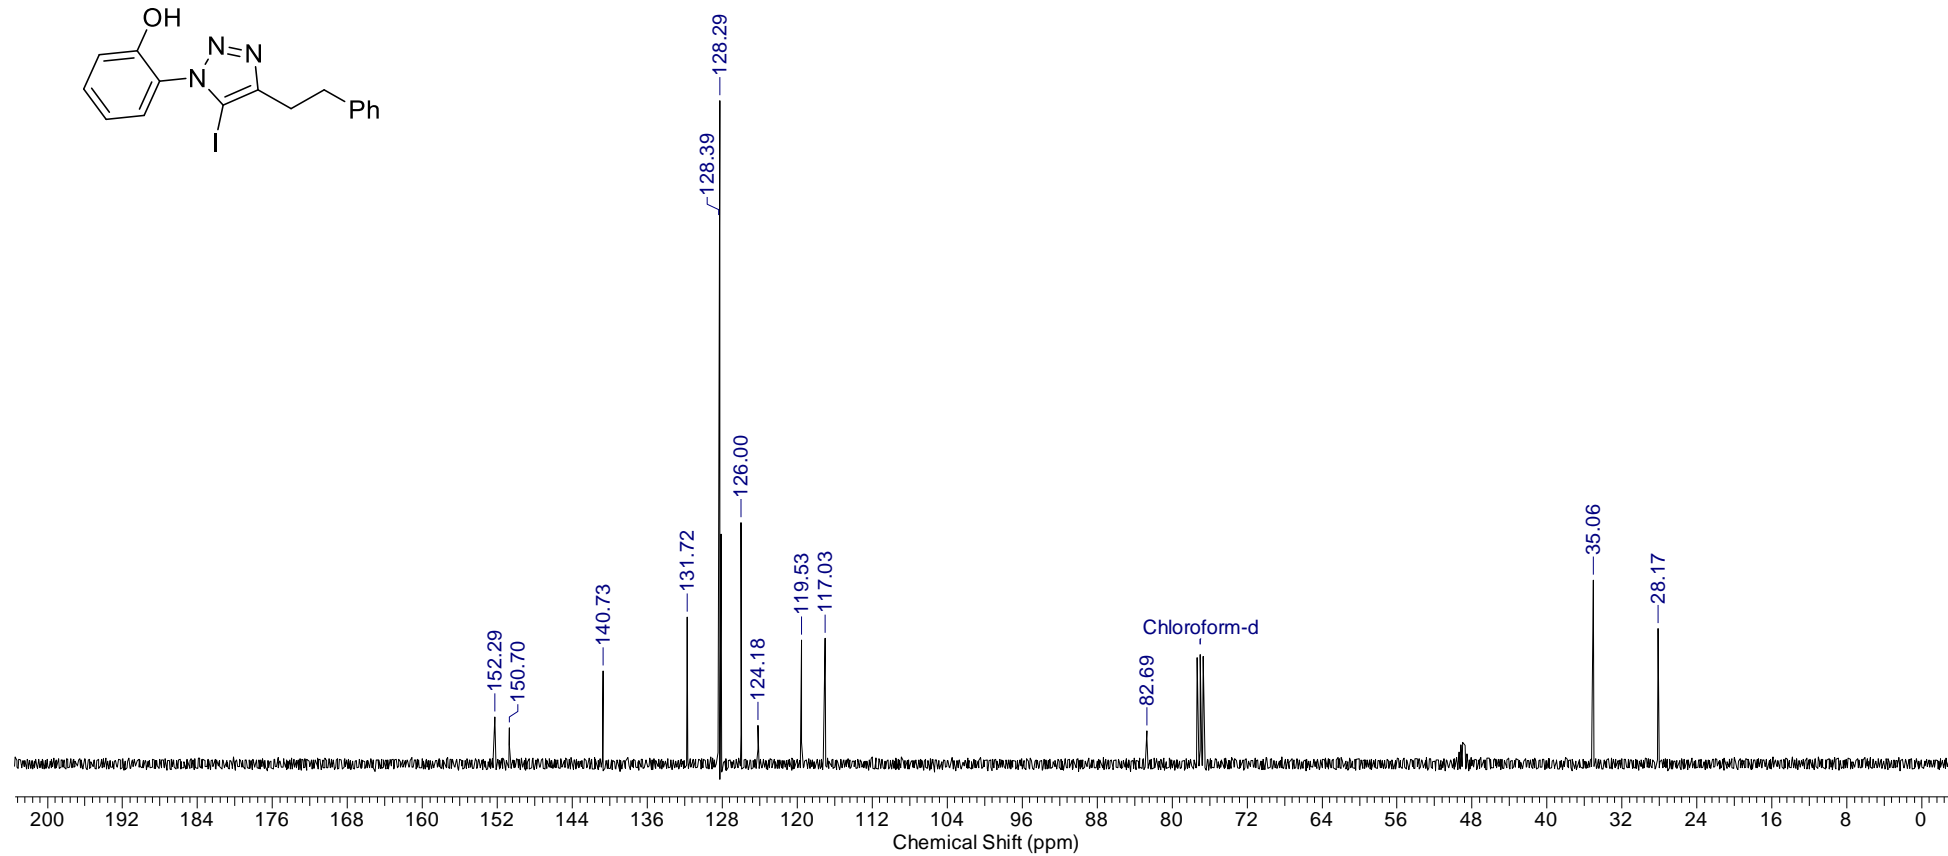

1-(1,3-Benzoxazol-2-yl)pentyl morpholine-4-carbodithioate (3a)

<sup>1</sup>H NMR (600 MHz, CDCl<sub>3</sub>)

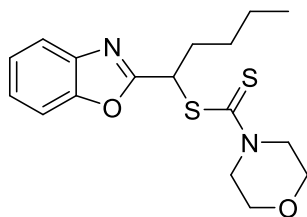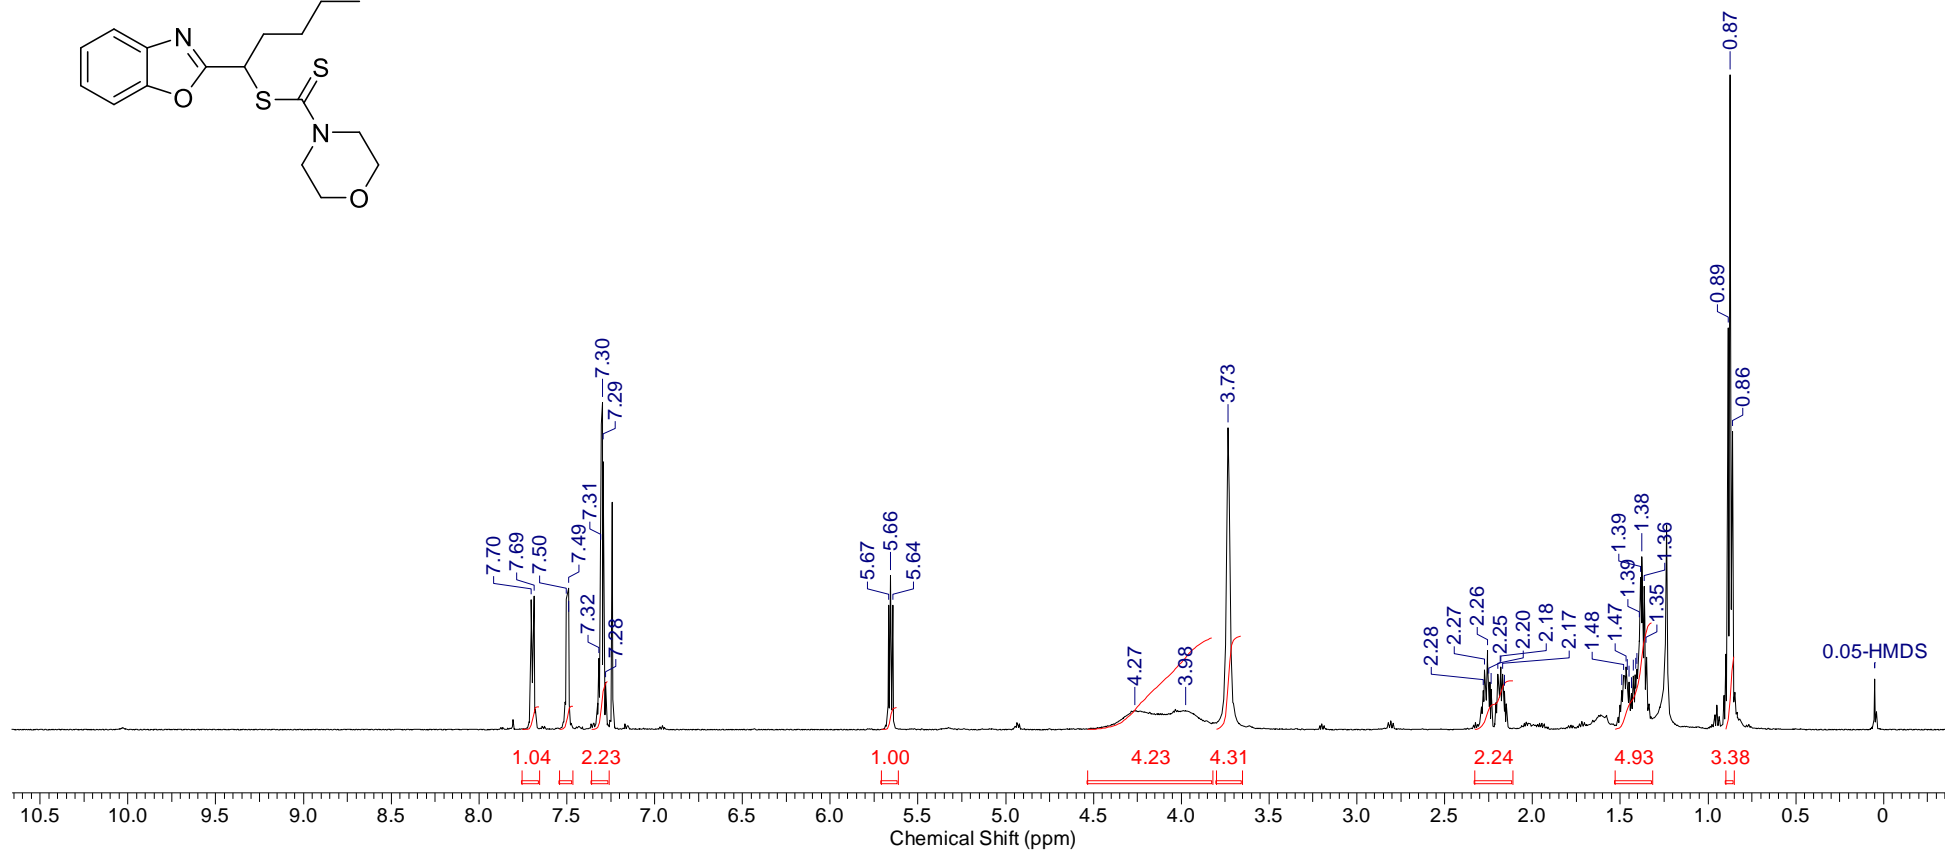

### 1-(1,3-Benzoxazol-2-yl)pentyl morpholine-4-carbodithioate (3a)

$^{13}\text{C}$  NMR (151 MHz,  $\text{CDCl}_3$ )

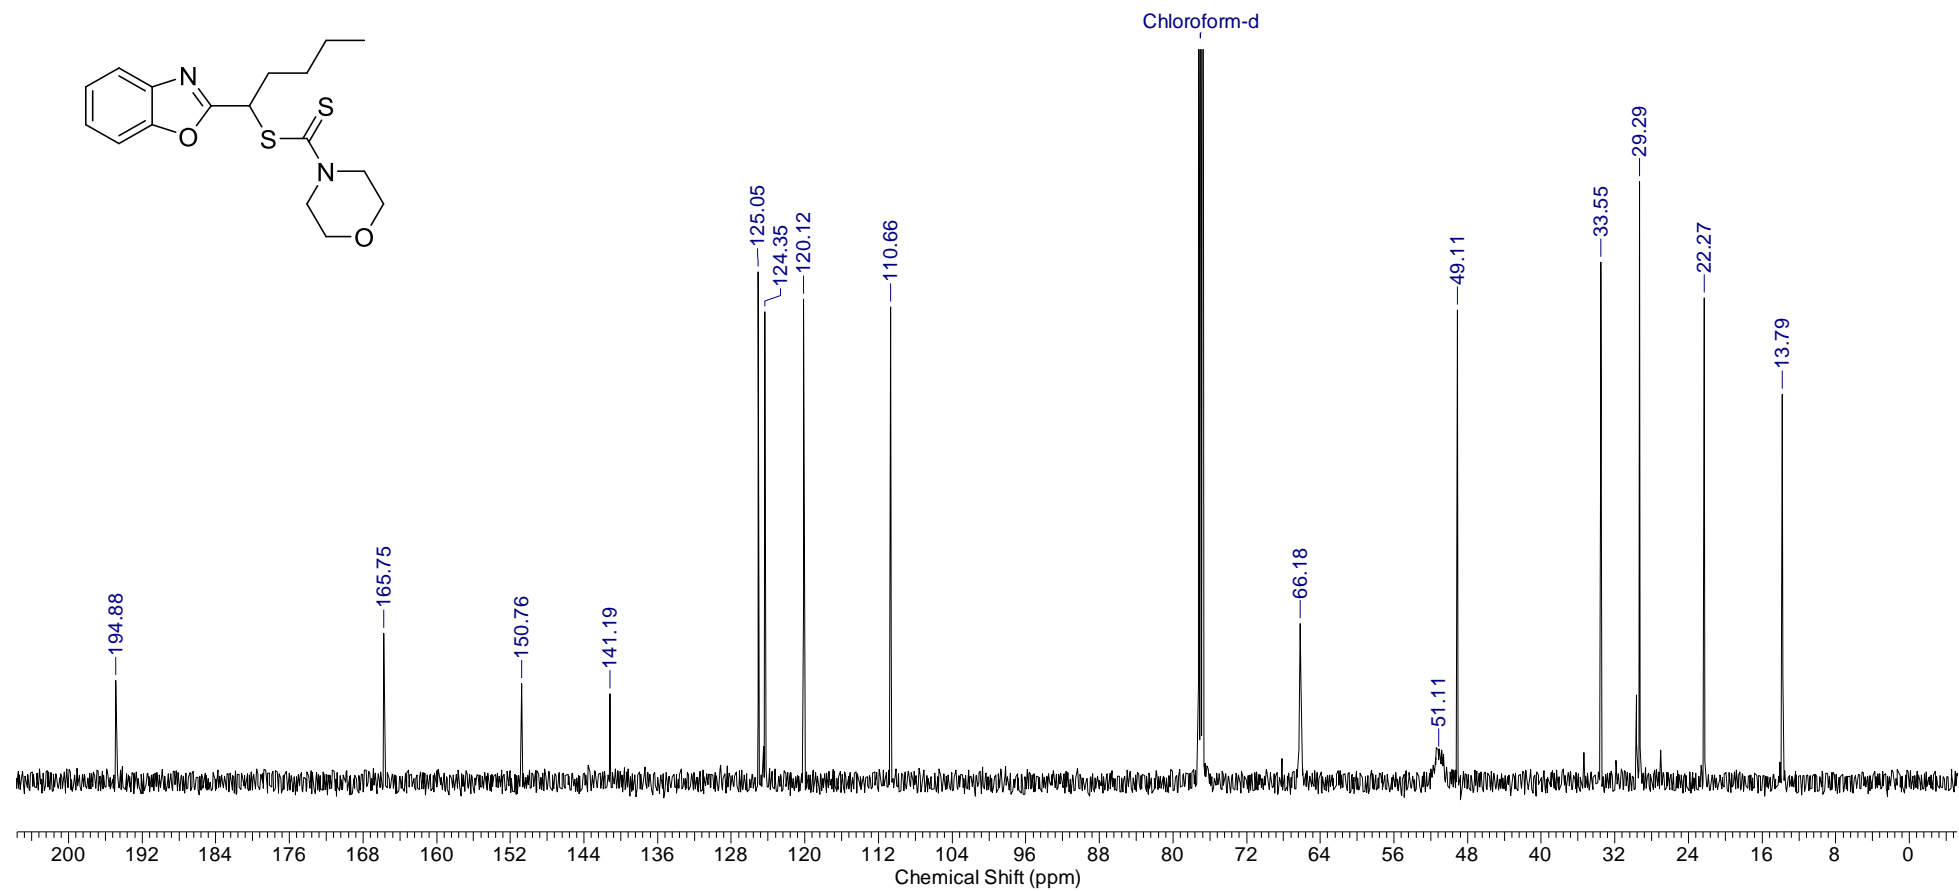

### 1-(1,3-Benzoxazol-2-yl)pentyl thiomorpholine-4-carbodithioate (3b)

<sup>1</sup>H NMR (400 MHz, CDCl<sub>3</sub>)

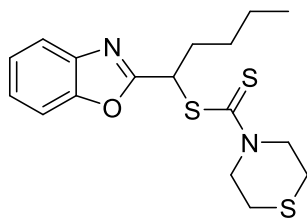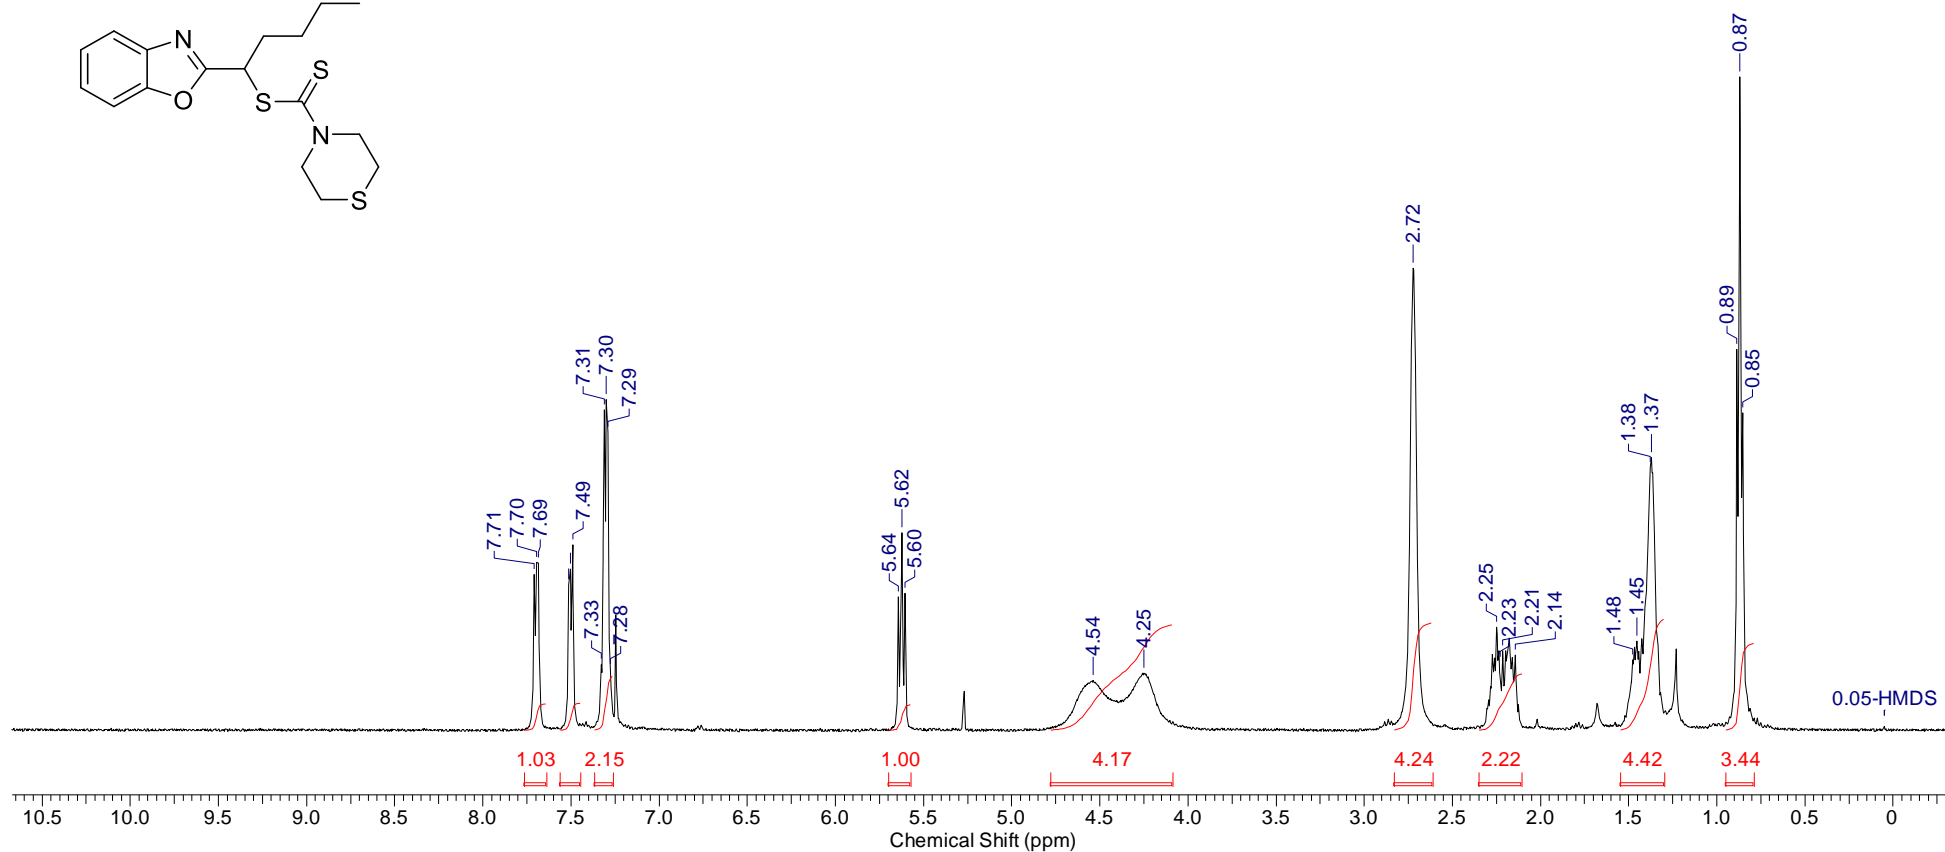

### 1-(1,3-Benzoxazol-2-yl)pentyl thiomorpholine-4-carbodithioate (3b)

$^{13}\text{C}$  NMR (100 MHz,  $\text{CDCl}_3$ )

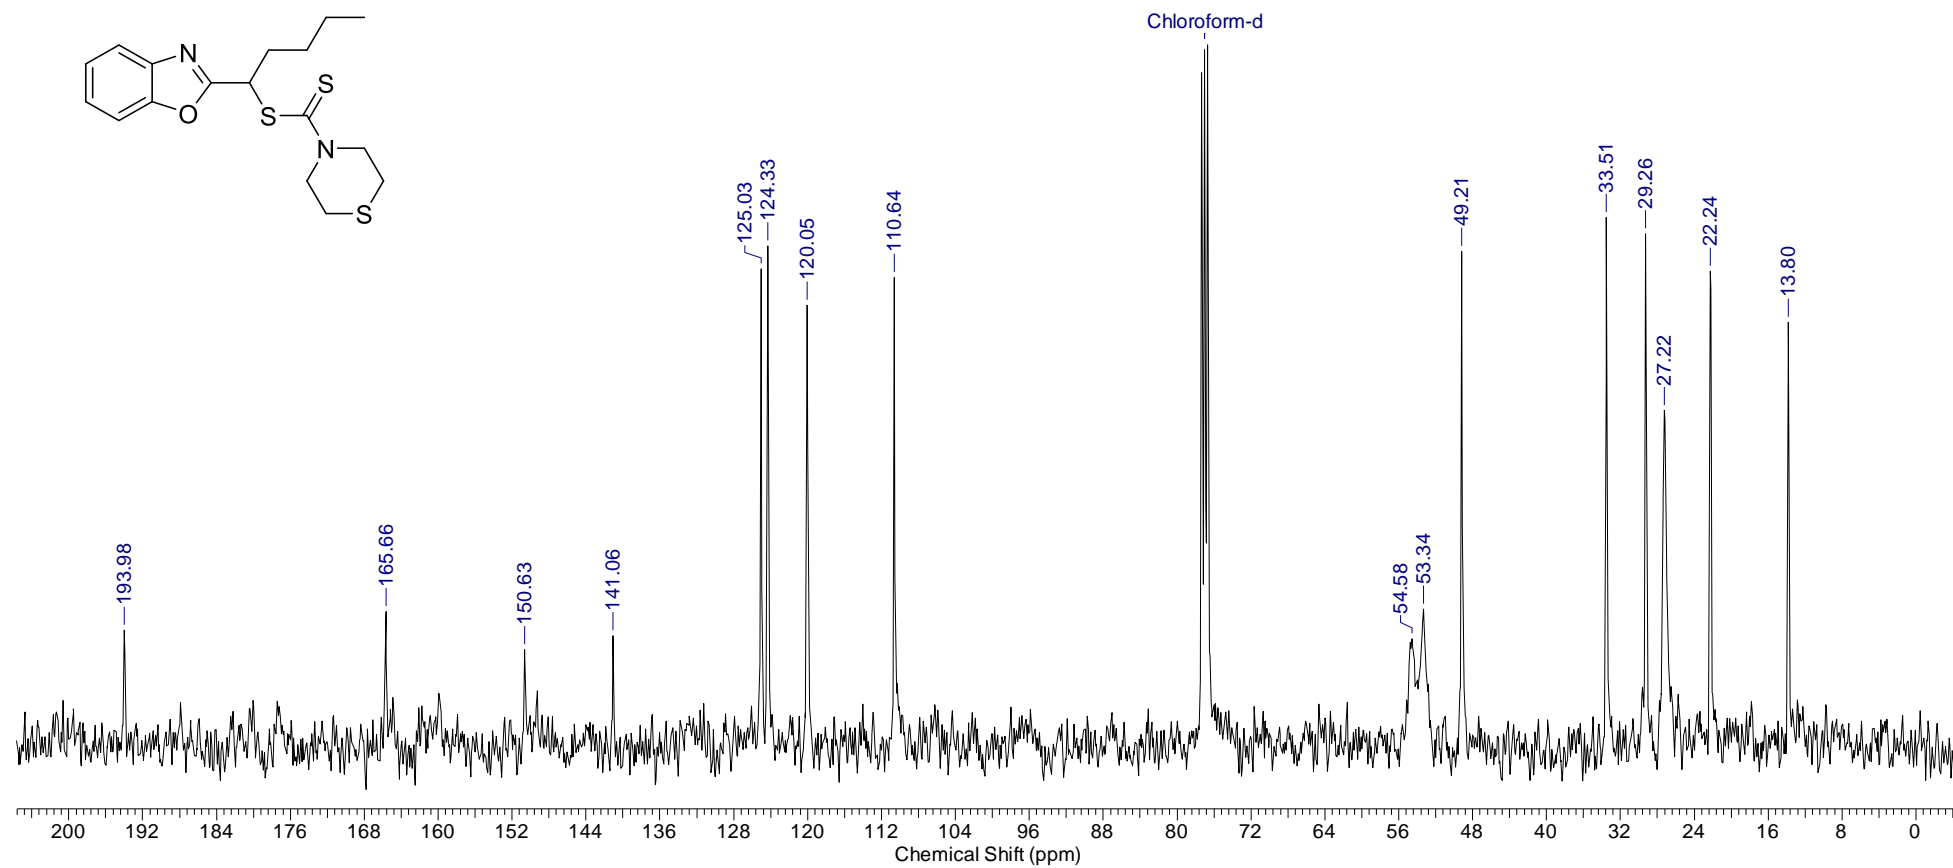



### 1-(1,3-Benzoxazol-2-yl)pentyl piperidine-4-carbodithioate (3c)

$^1\text{H}$  NMR (400 MHz,  $\text{CDCl}_3$ )

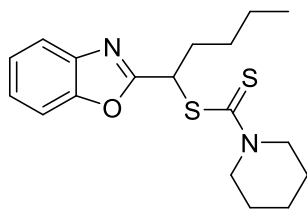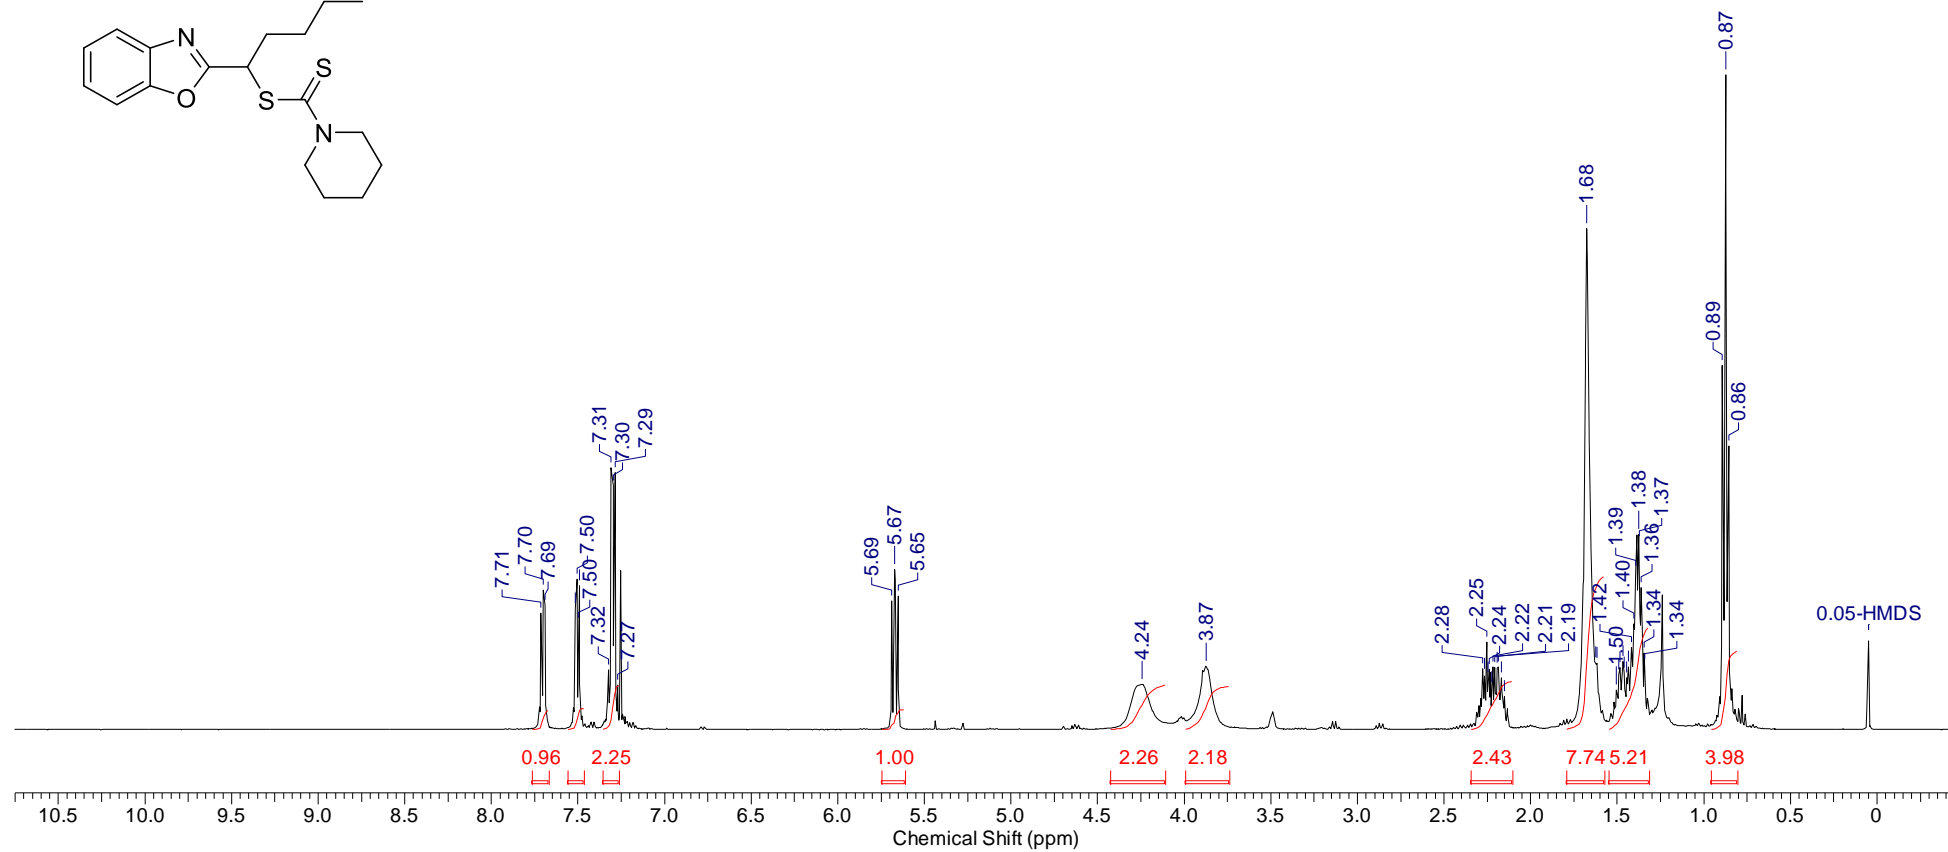

### 1-(1,3-Benzoxazol-2-yl)pentyl piperidine-4-carbodithioate (3c)

$^{13}\text{C}$  NMR (100 MHz,  $\text{CDCl}_3$ )

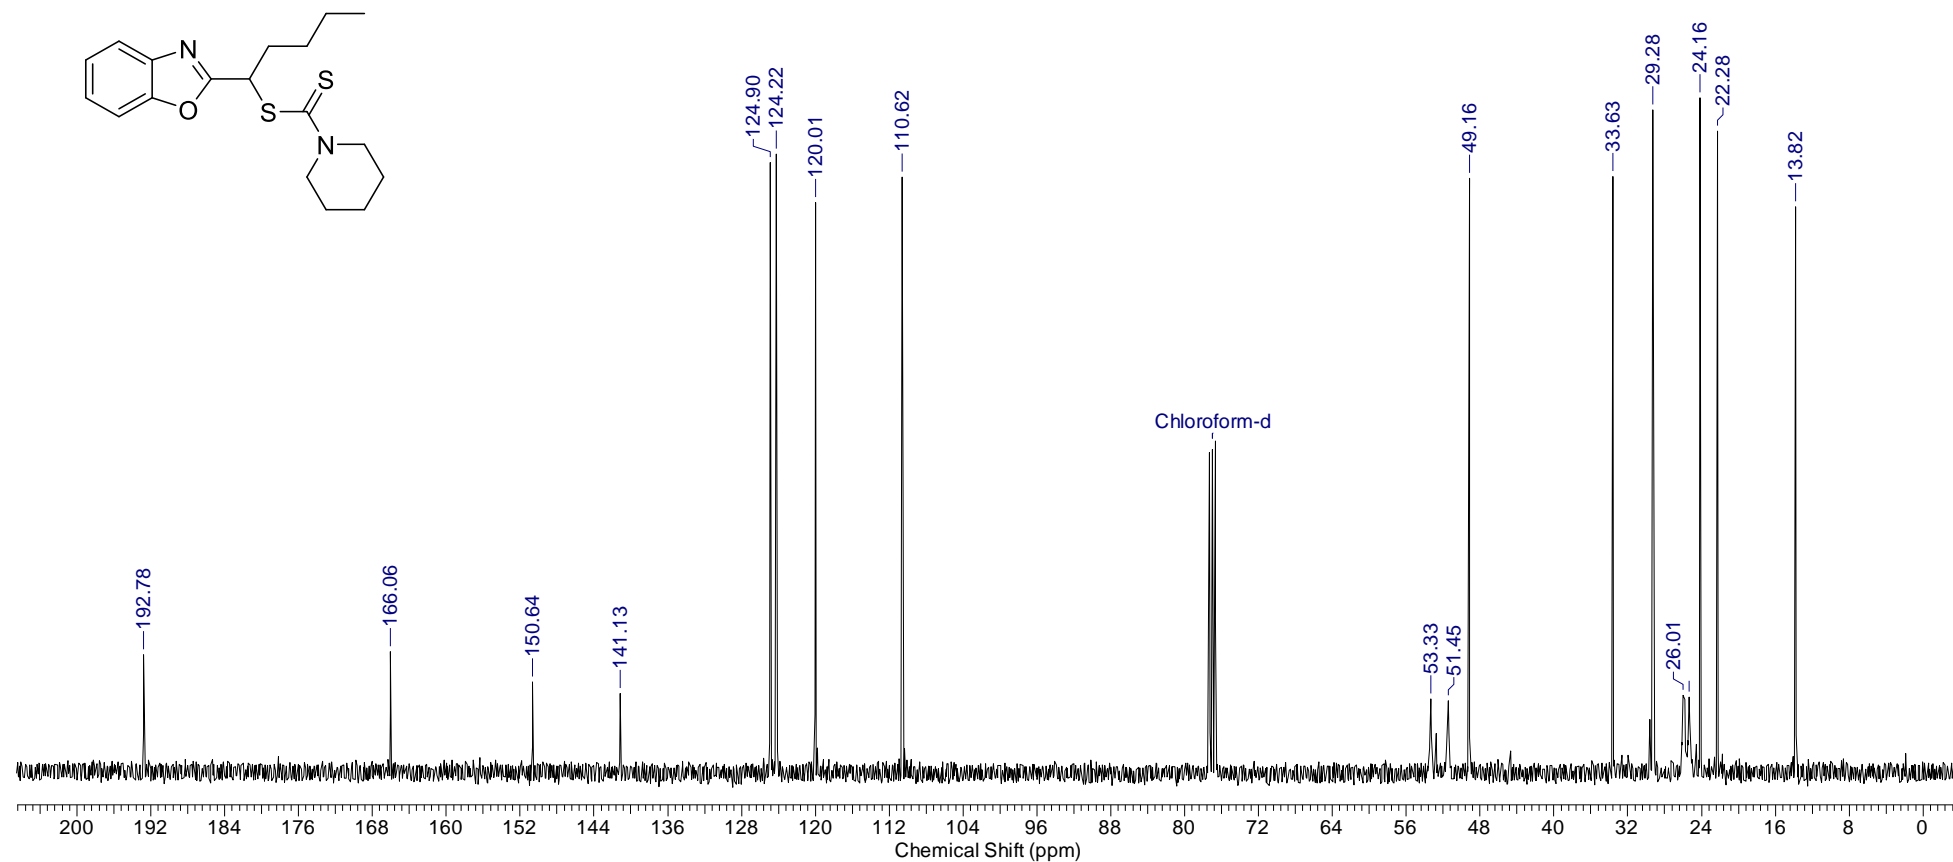

### 1-(1,3-Benzoxazol-2-yl)pentyl pyrrolidine-4-carbodithioate (3d)

<sup>1</sup>H NMR (600 MHz, CDCl<sub>3</sub>)

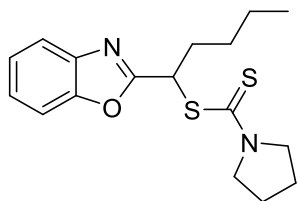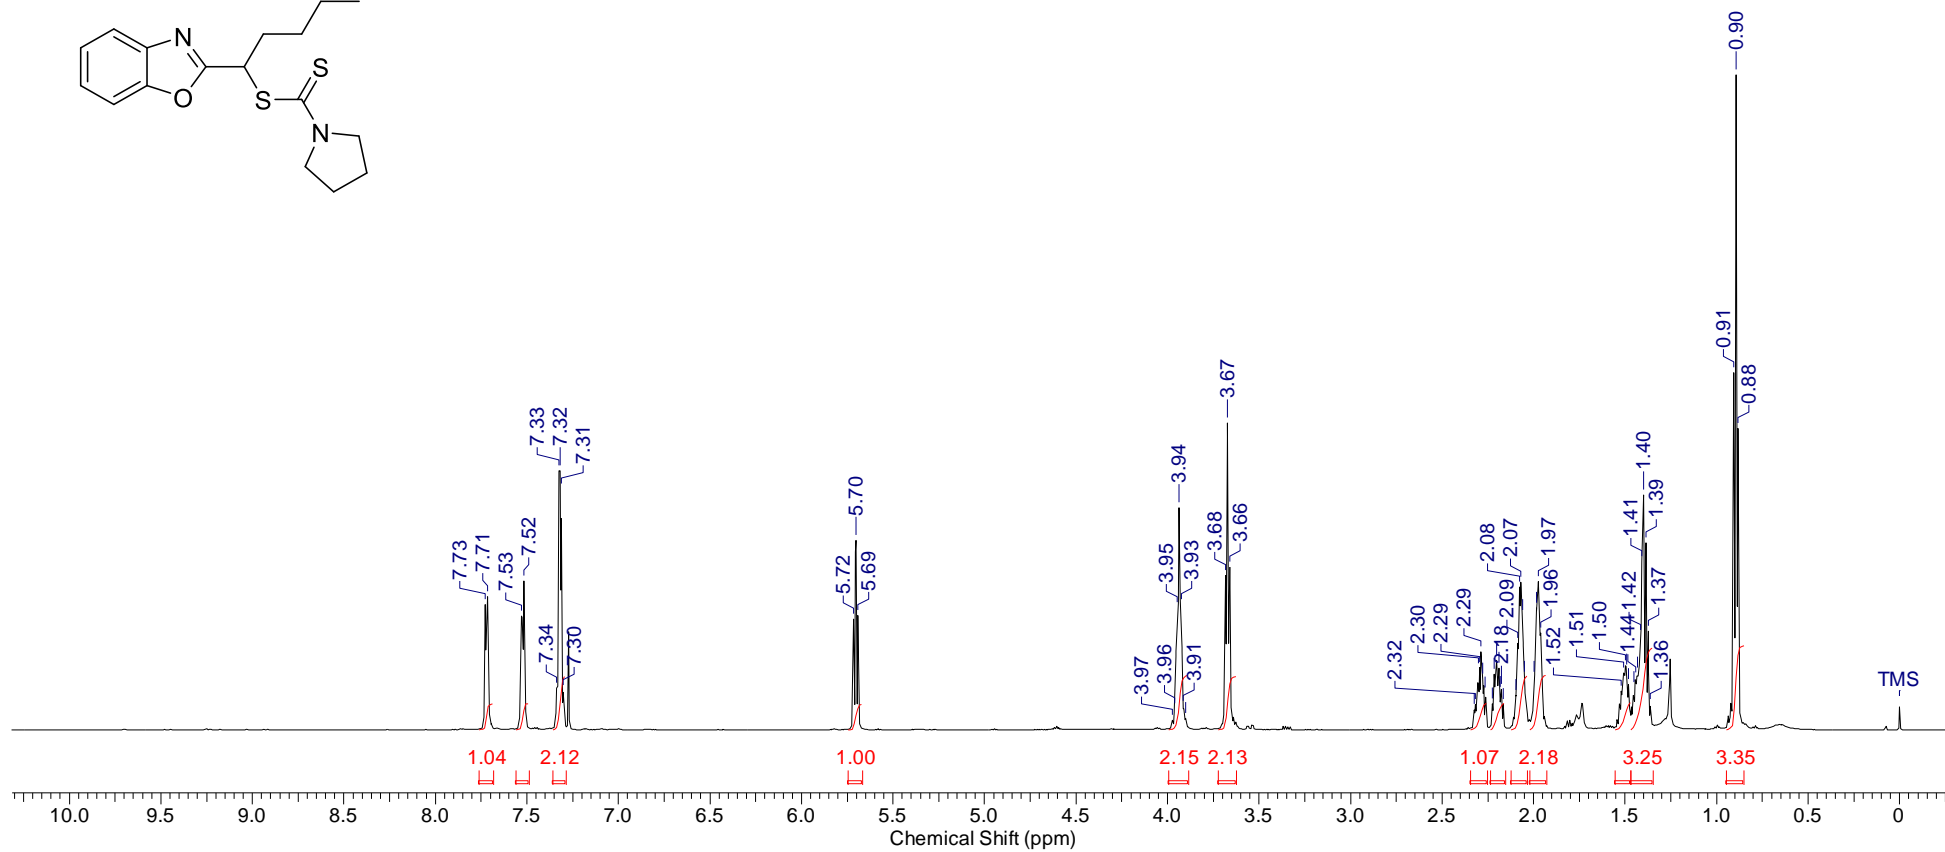

### 1-(1,3-Benzoxazol-2-yl)pentyl pyrrolidine-4-carbodithioate (3d)

$^{13}\text{C}$  NMR (151 MHz,  $\text{CDCl}_3$ )

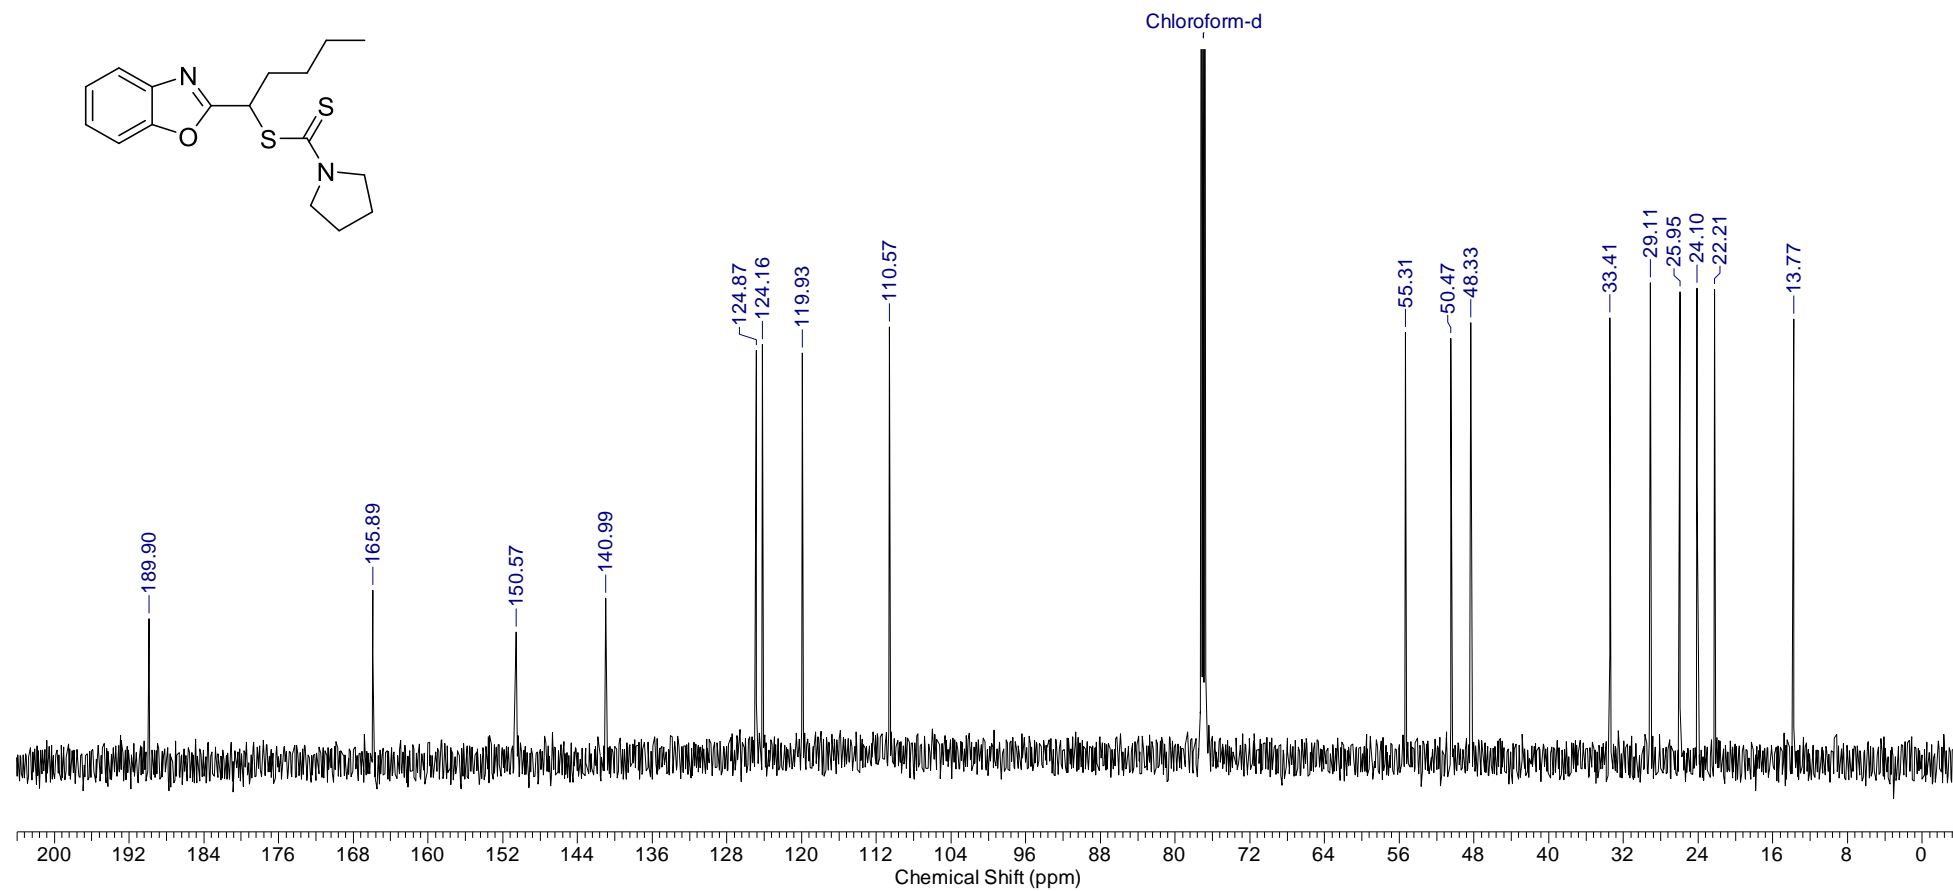

1-(1,3-Benzoxazol-2-yl)pentyl (2*R*,6*S*)-2,6-dimethylmorpholine-4-carbodithioate (3e)

<sup>1</sup>H NMR (600 MHz, CDCl<sub>3</sub>)

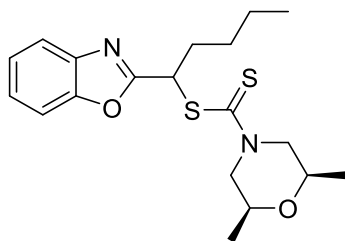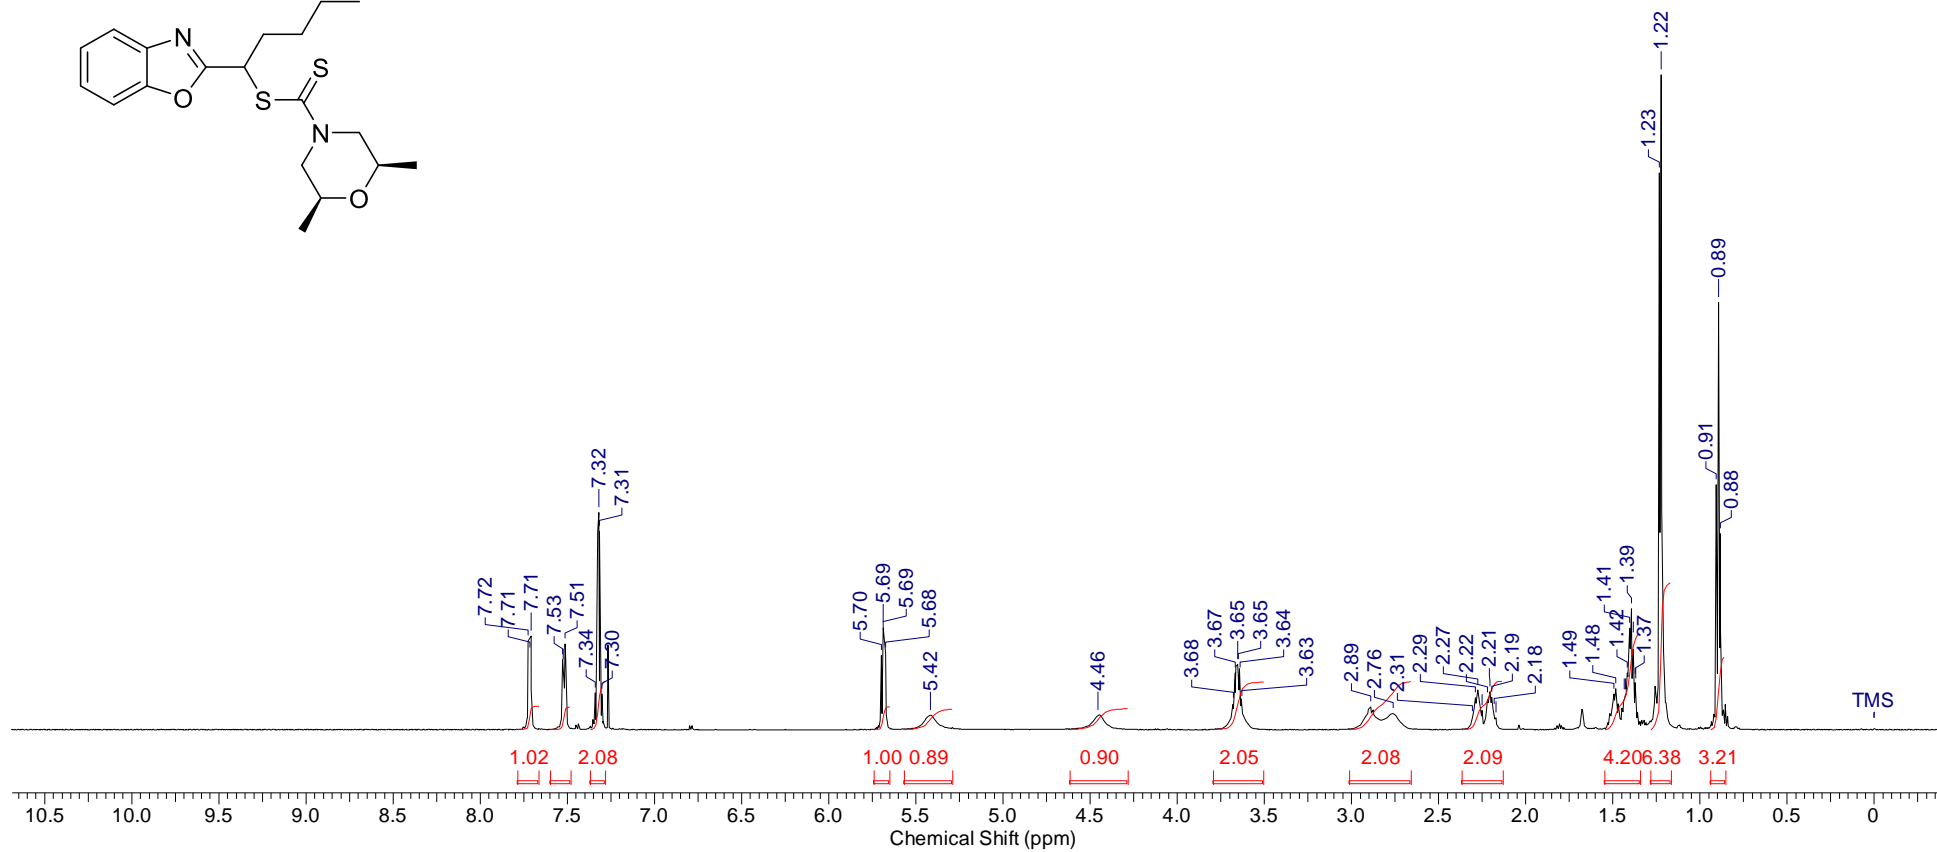

1-(1,3-Benzoxazol-2-yl)pentyl (2*R*,6*S*)-2,6-dimethylmorpholine-4-carbodithioate (3e)

$^{13}\text{C}$  NMR (151 MHz,  $\text{CDCl}_3$ )

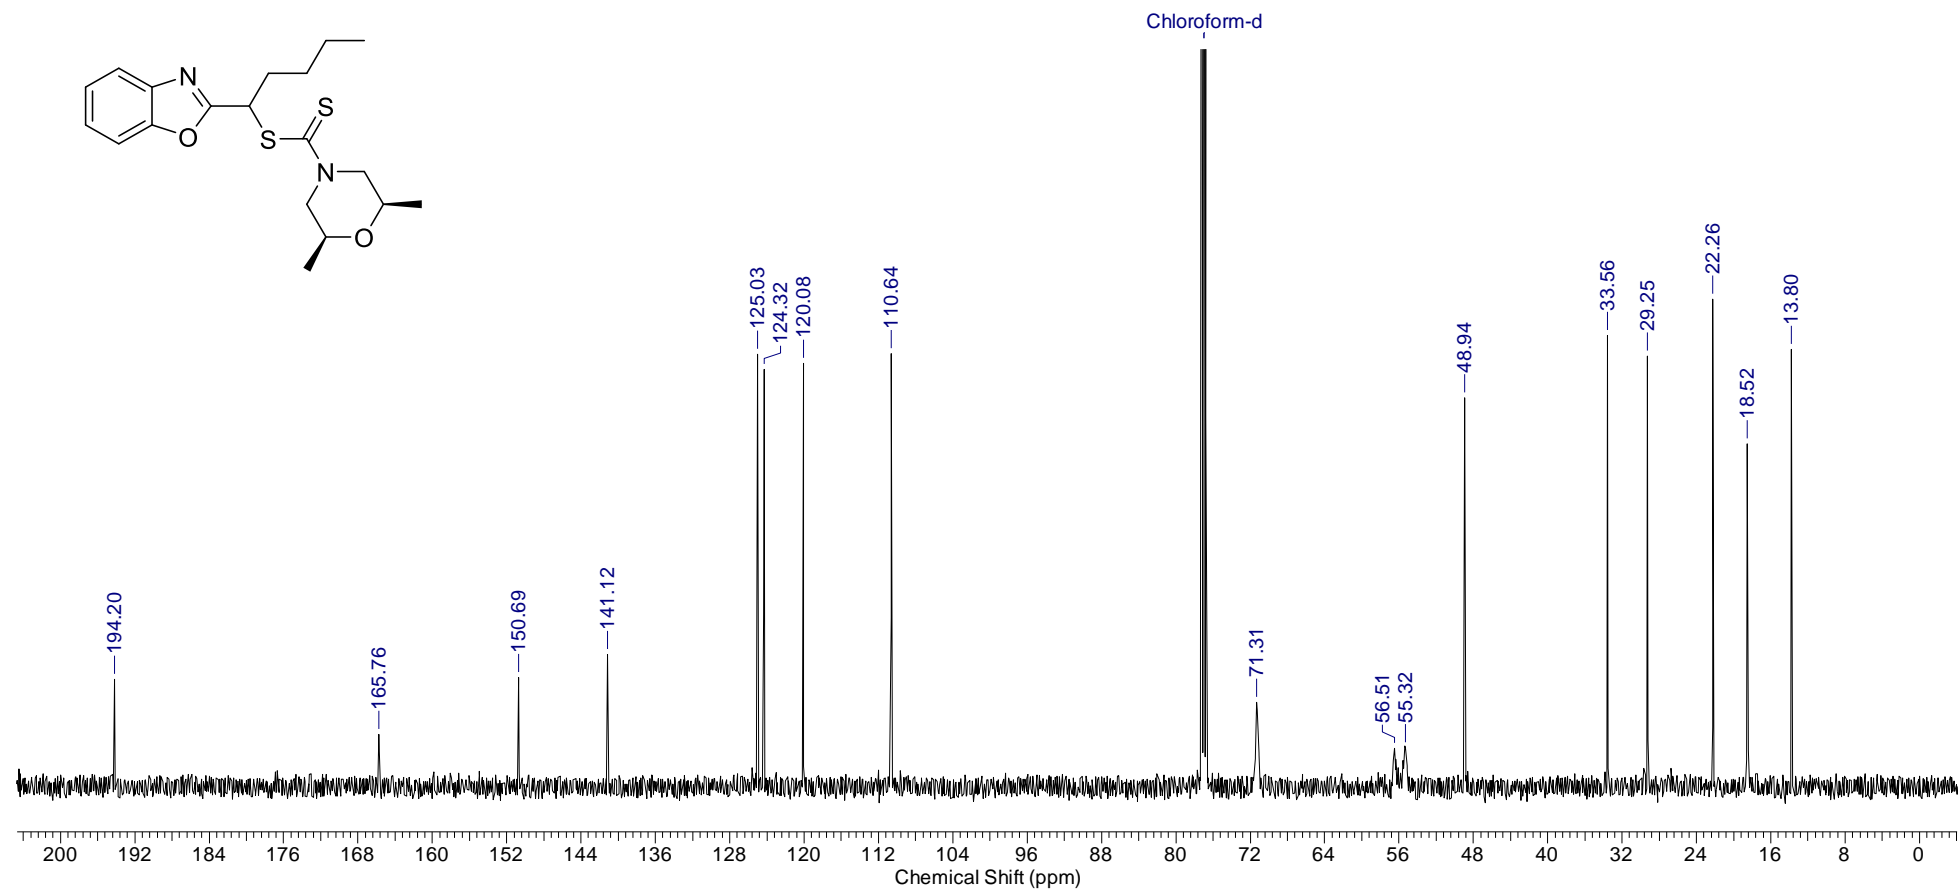

1-(1,3-Benzoxazol-2-yl)pentyl 4-acetylpiperazine-1-carbodithioate (3f)

<sup>1</sup>H NMR (400 MHz, CDCl<sub>3</sub>)

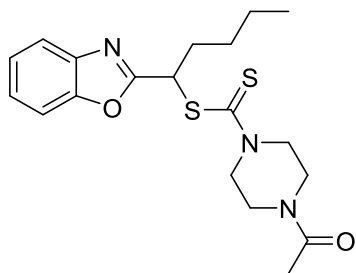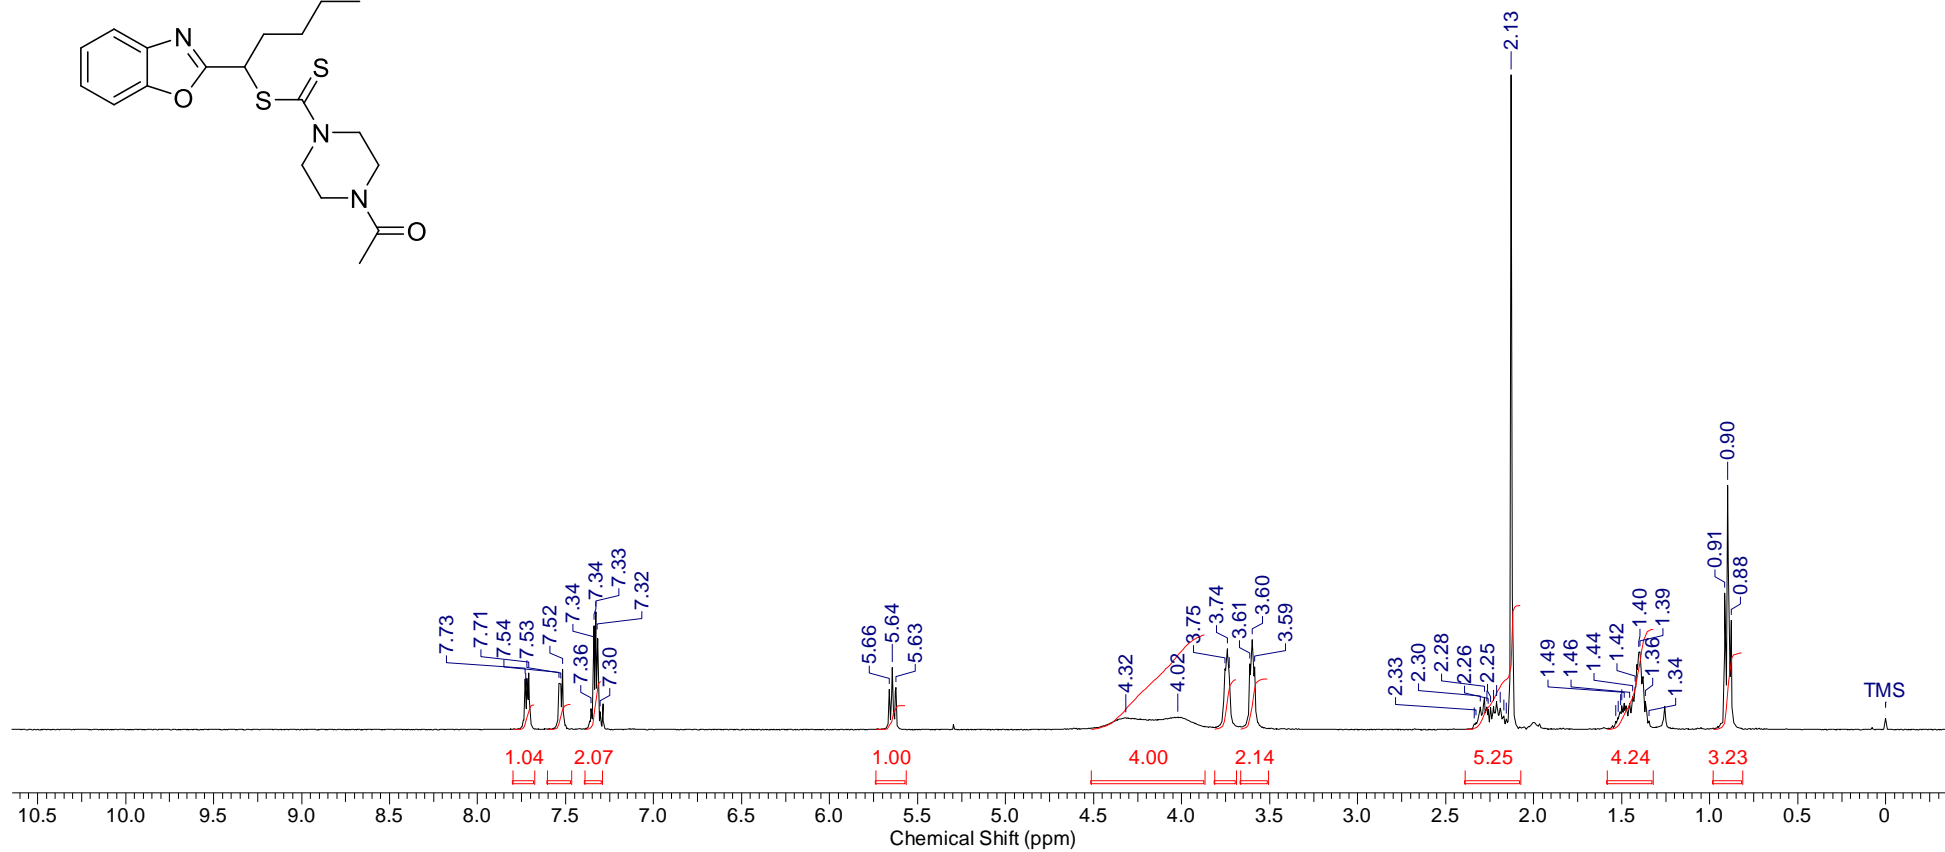

### 1-(1,3-Benzoxazol-2-yl)pentyl 4-acetylpiperazine-1-carbodithioate (3f)

$^{13}\text{C}$  NMR (100 MHz,  $\text{CDCl}_3$ )

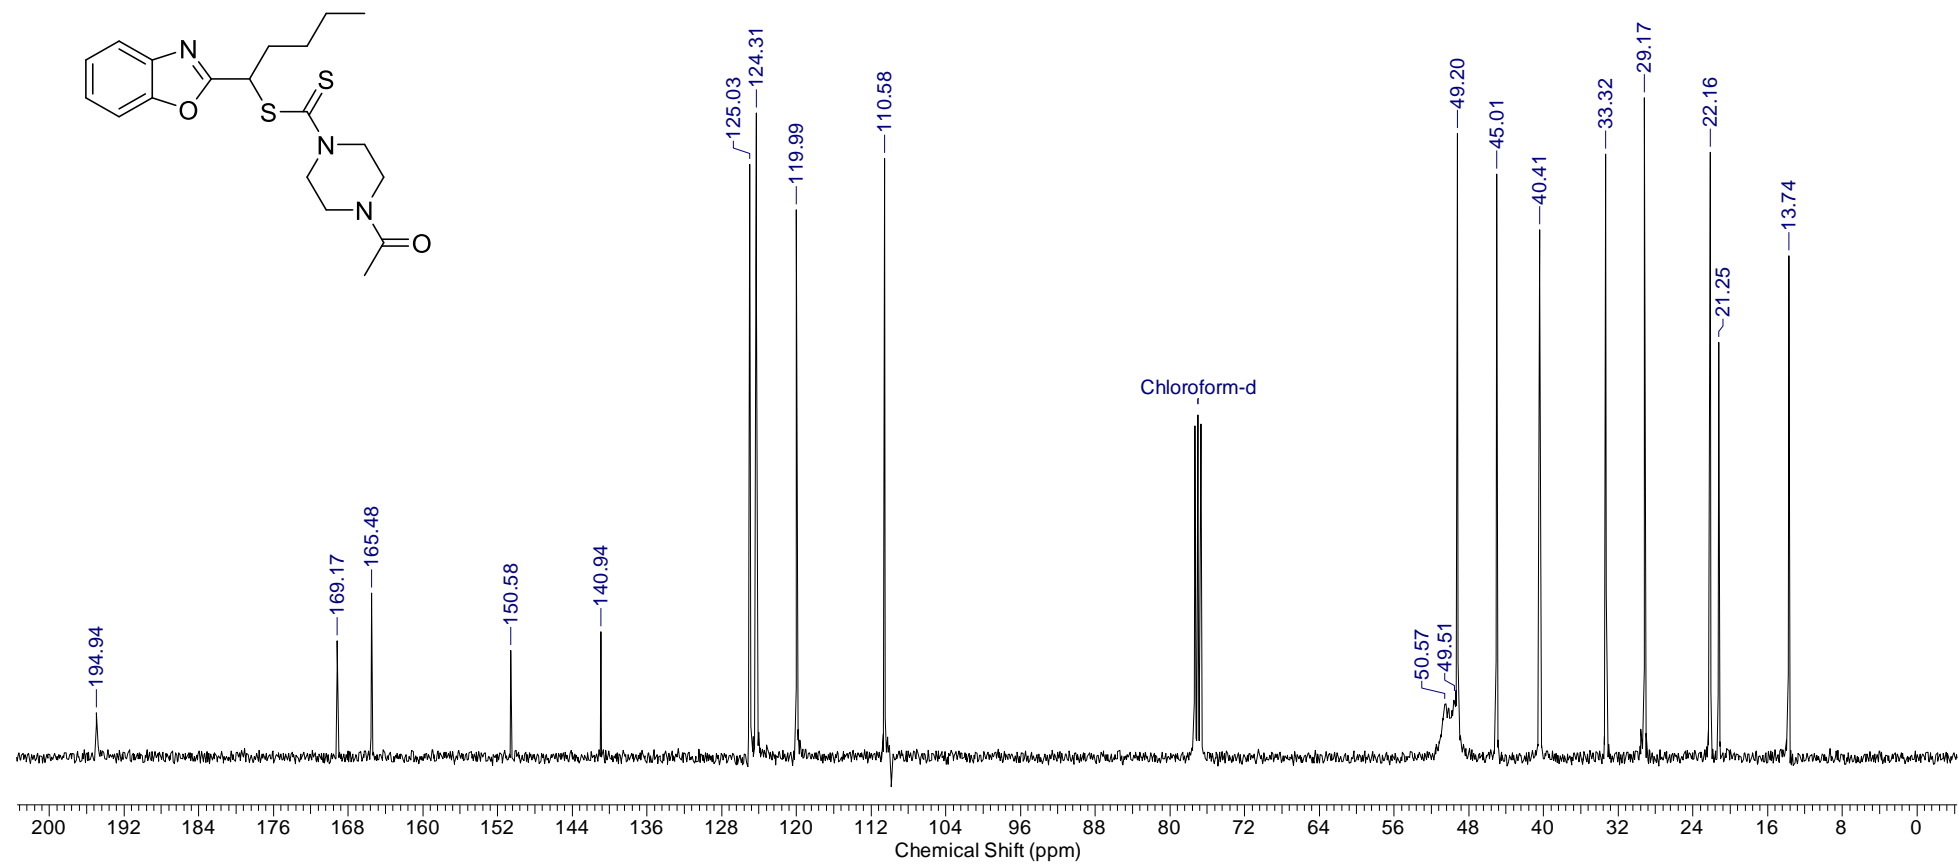



1-(1,3-Benzoxazol-2-yl)pentyl 3,4-dihydroisoquinoline-2(1H)-carbodithioate (3g)

$^1\text{H}$  NMR (400 MHz,  $\text{CDCl}_3$ )

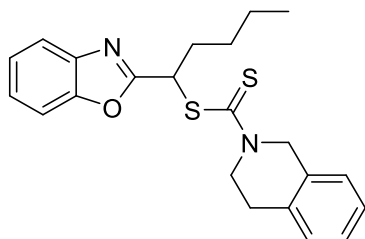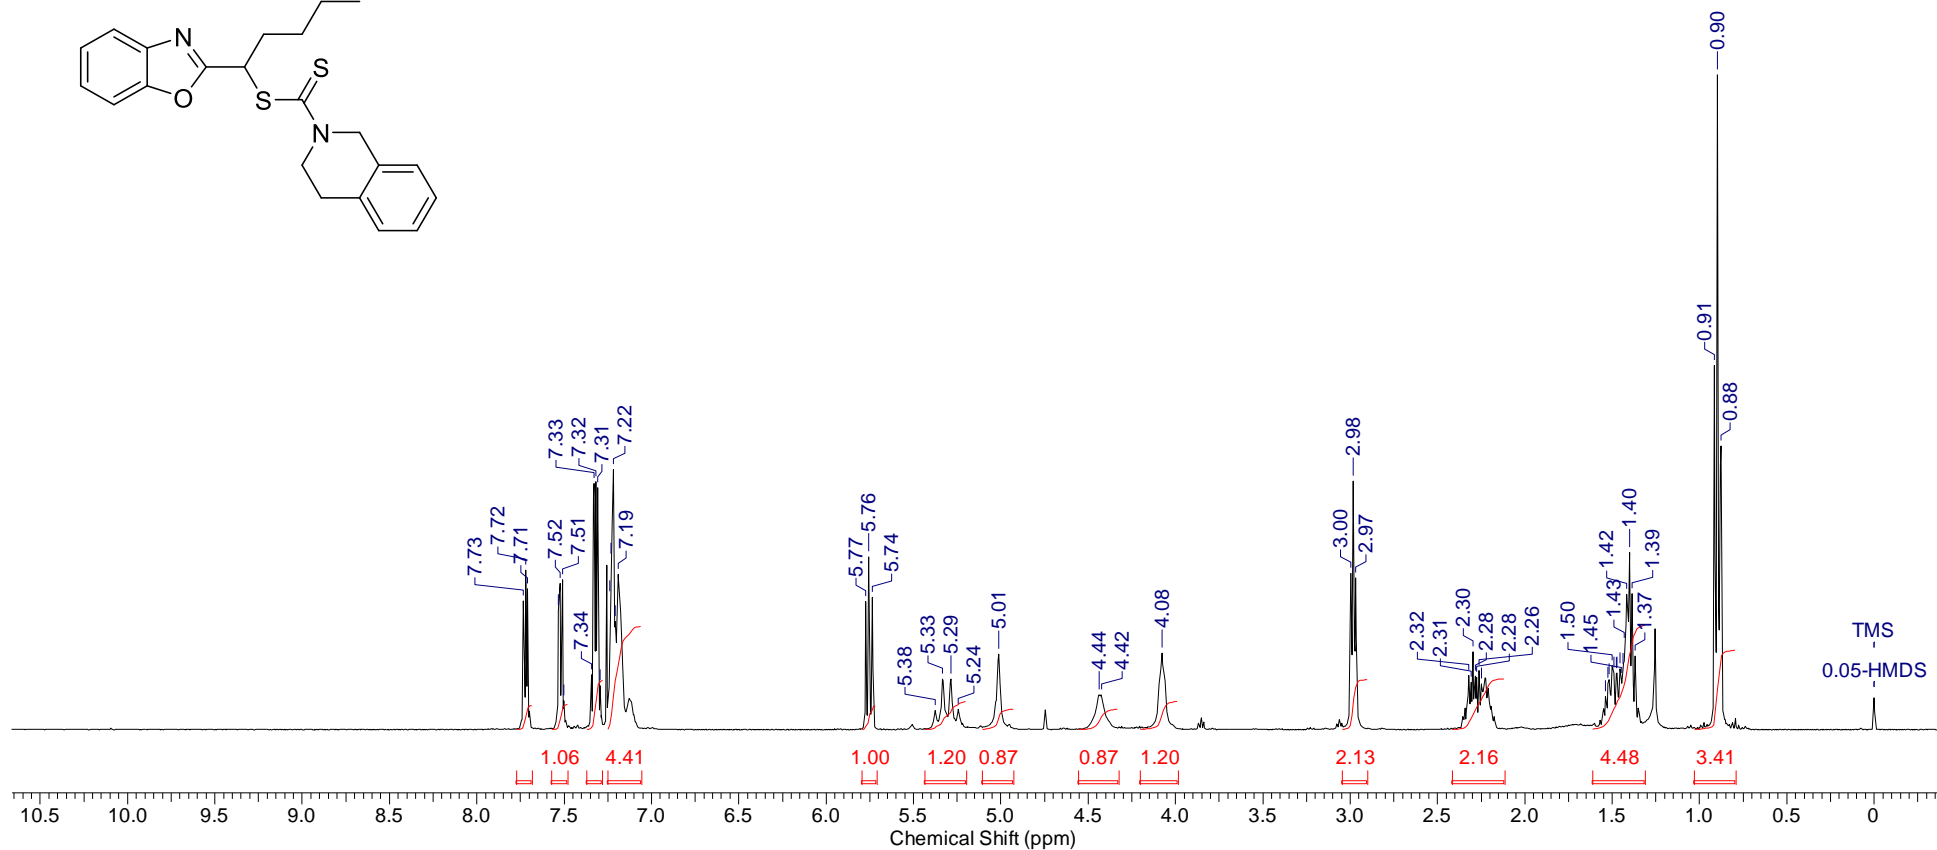

1-(1,3-Benzoxazol-2-yl)pentyl 3,4-dihydroisoquinoline-2(1H)-carbodithioate (3g)

$^{13}\text{C}$  NMR (100 MHz,  $\text{CDCl}_3$ )

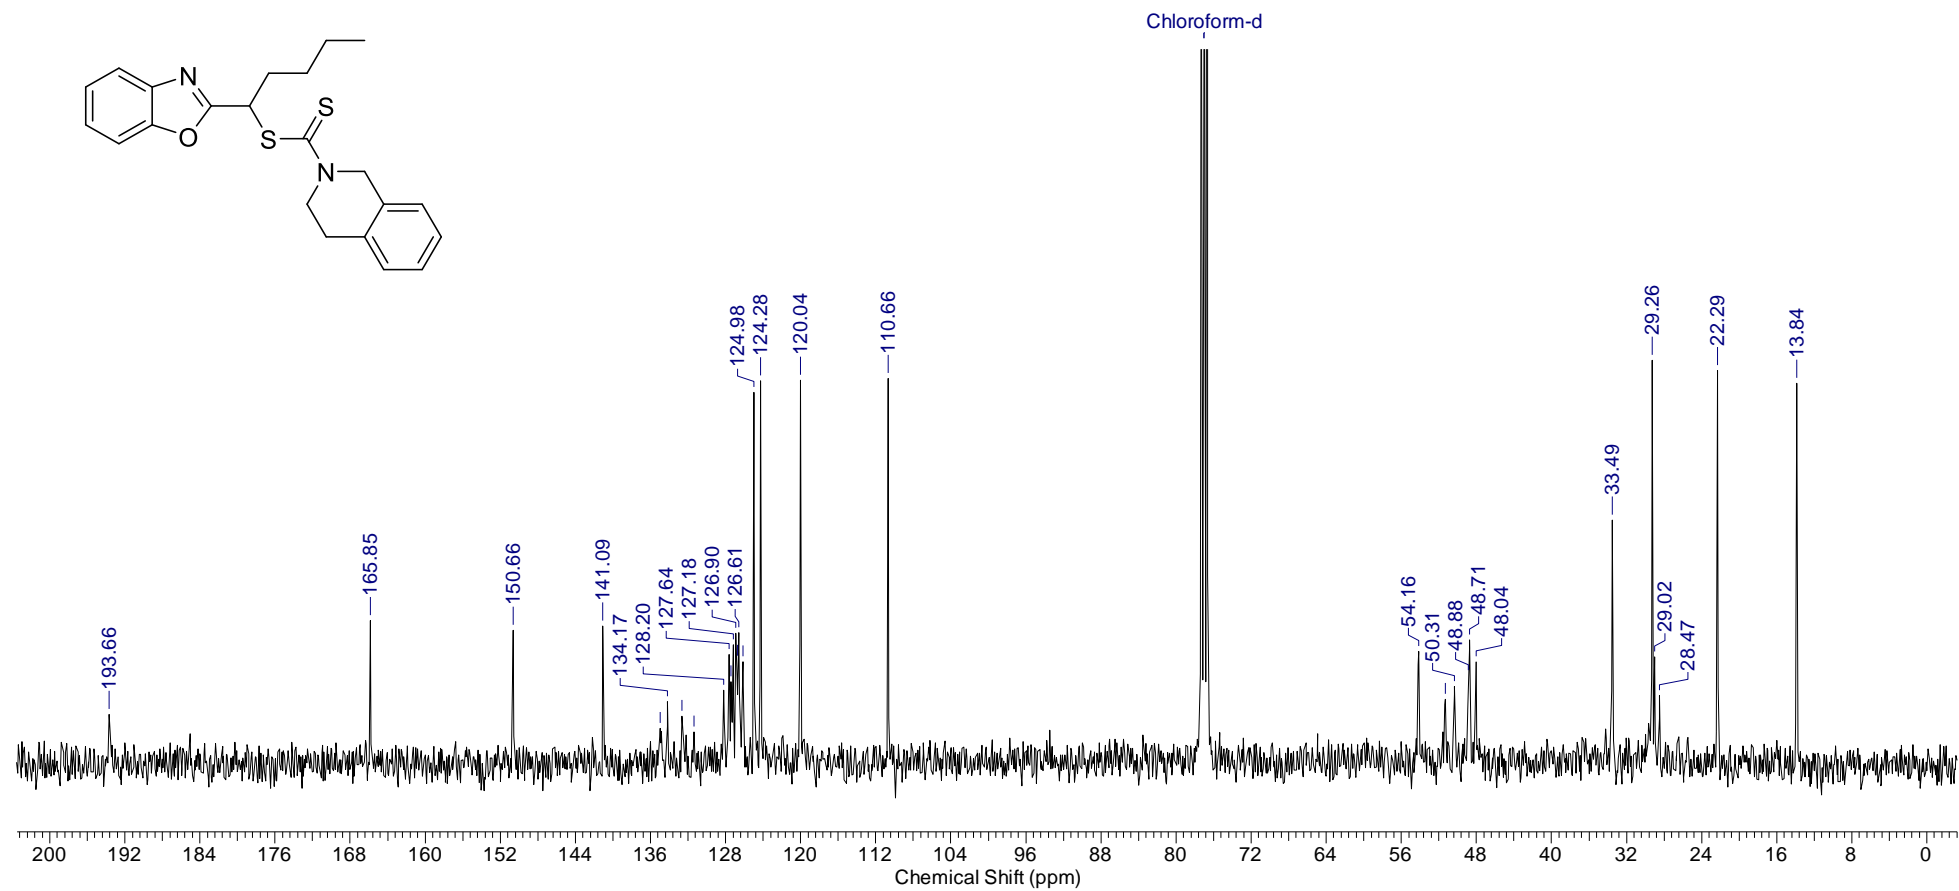

**1-(1,3-Benzoxazol-2-yl)pentyl benzyl(ethyl)dithiocarbamate (3h)**

<sup>1</sup>H NMR (400 MHz, CDCl<sub>3</sub>)

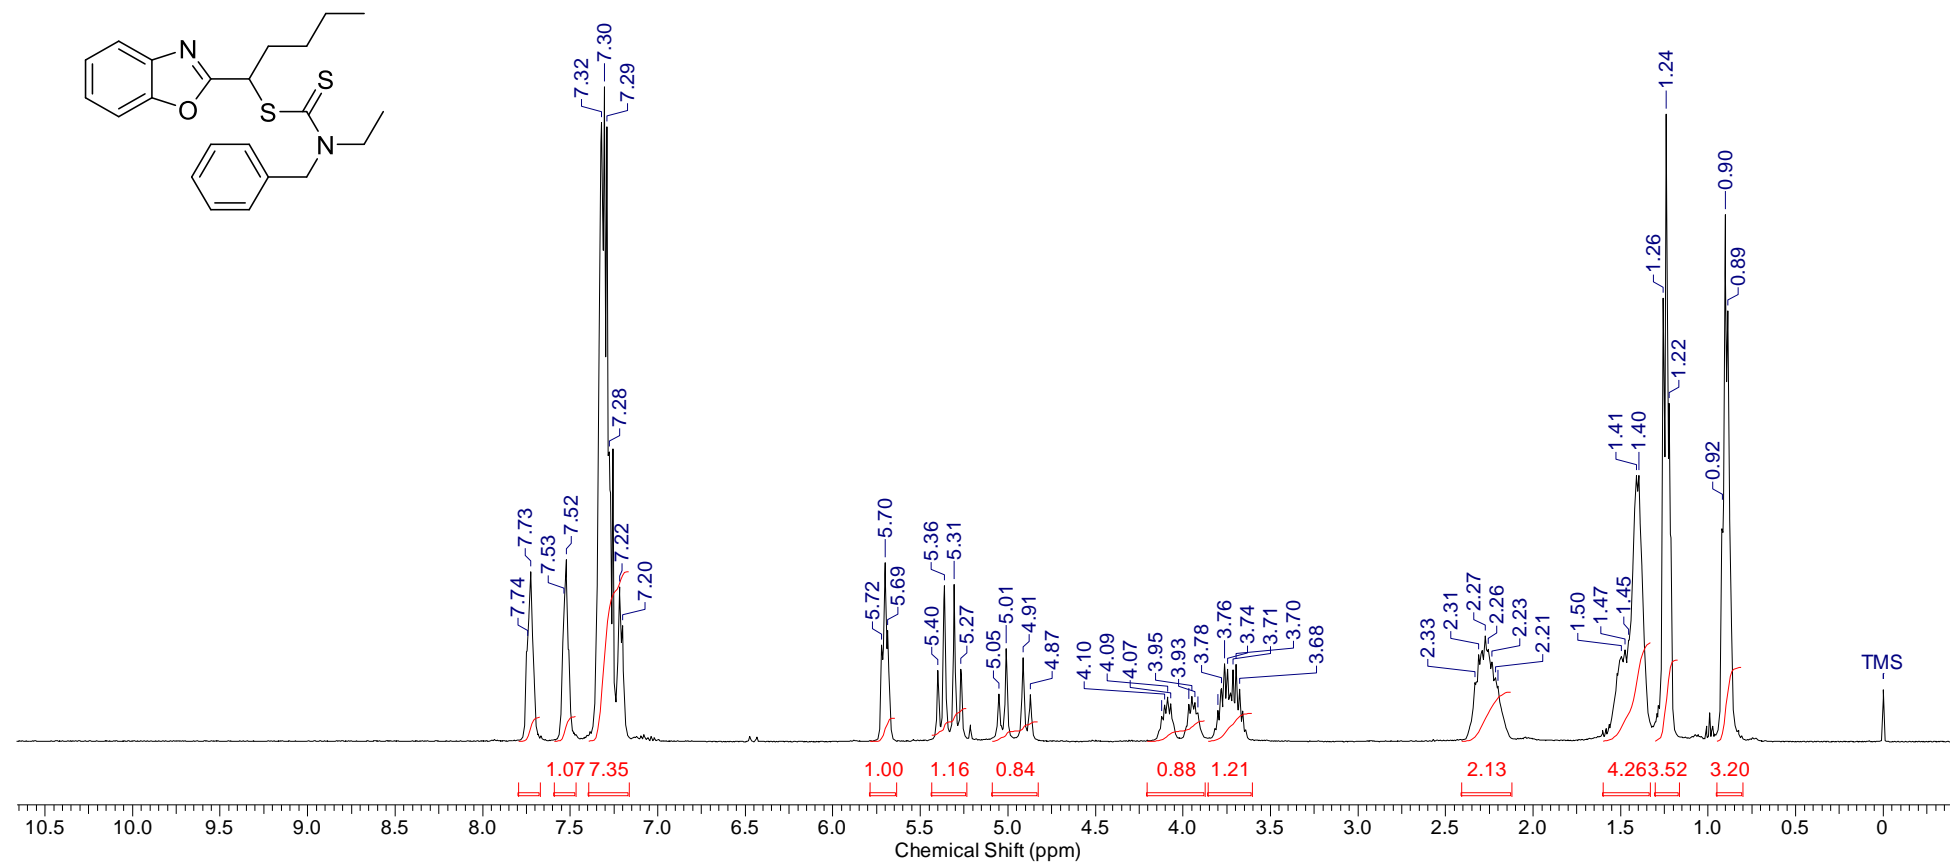

1-(1,3-Benzoxazol-2-yl)pentyl benzyl(ethyl)dithiocarbamate (3h)

$^{13}\text{C}$  NMR (100 MHz,  $\text{CDCl}_3$ )

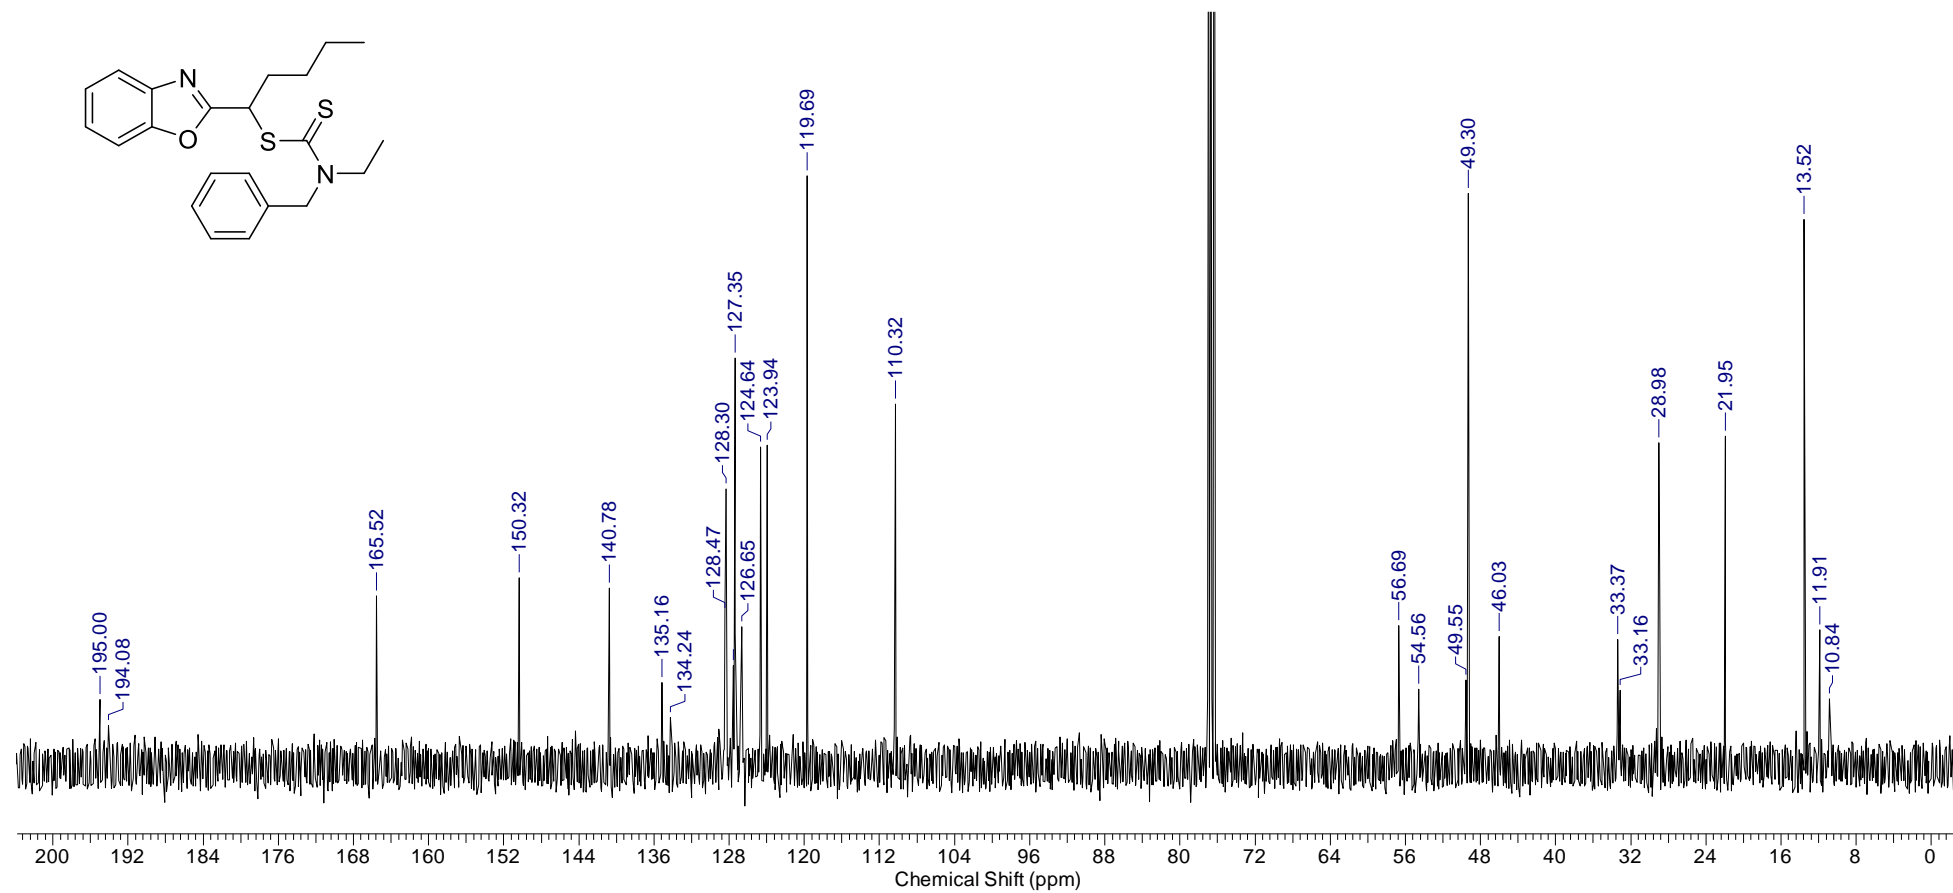

### 1-(5-Methyl-1,3-benzoxazol-2-yl)pentyl morpholine-4-carbodithioate (31)

$^1\text{H}$  NMR (400 MHz,  $\text{CDCl}_3$ )

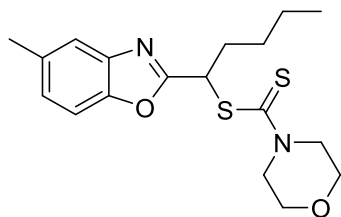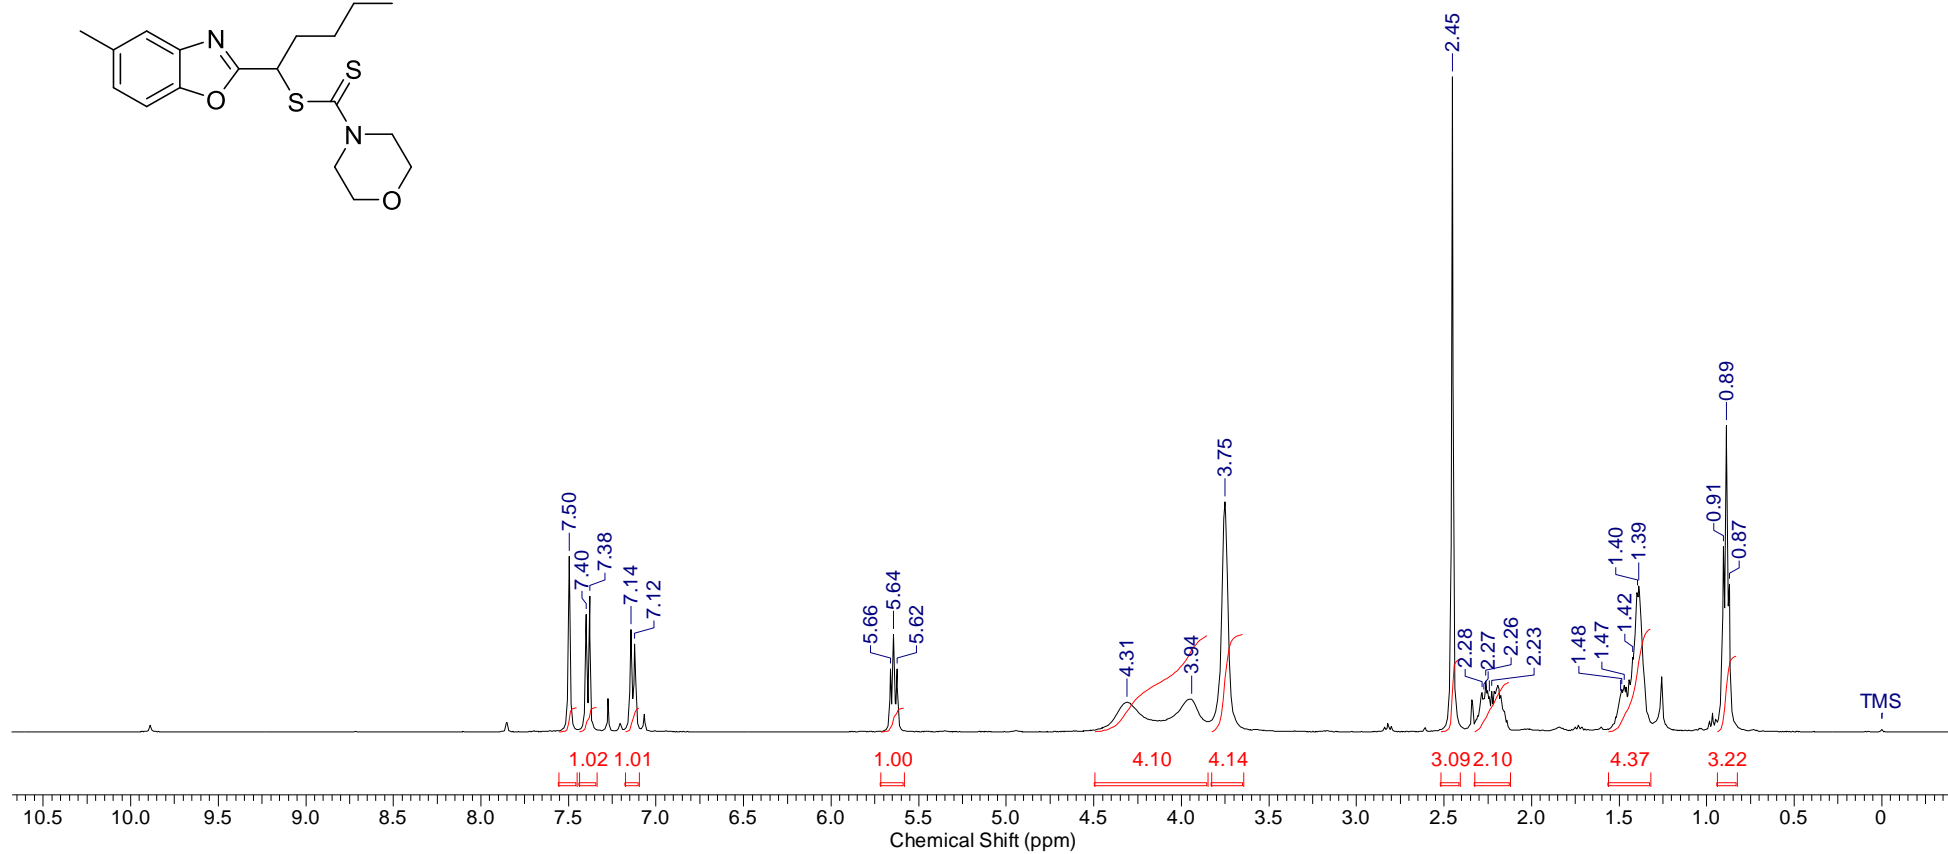

**1-(5-Methyl-1,3-benzoxazol-2-yl)pentyl morpholine-4-carbodithioate (31)**

$^{13}\text{C}$  NMR (100 MHz,  $\text{CDCl}_3$ )

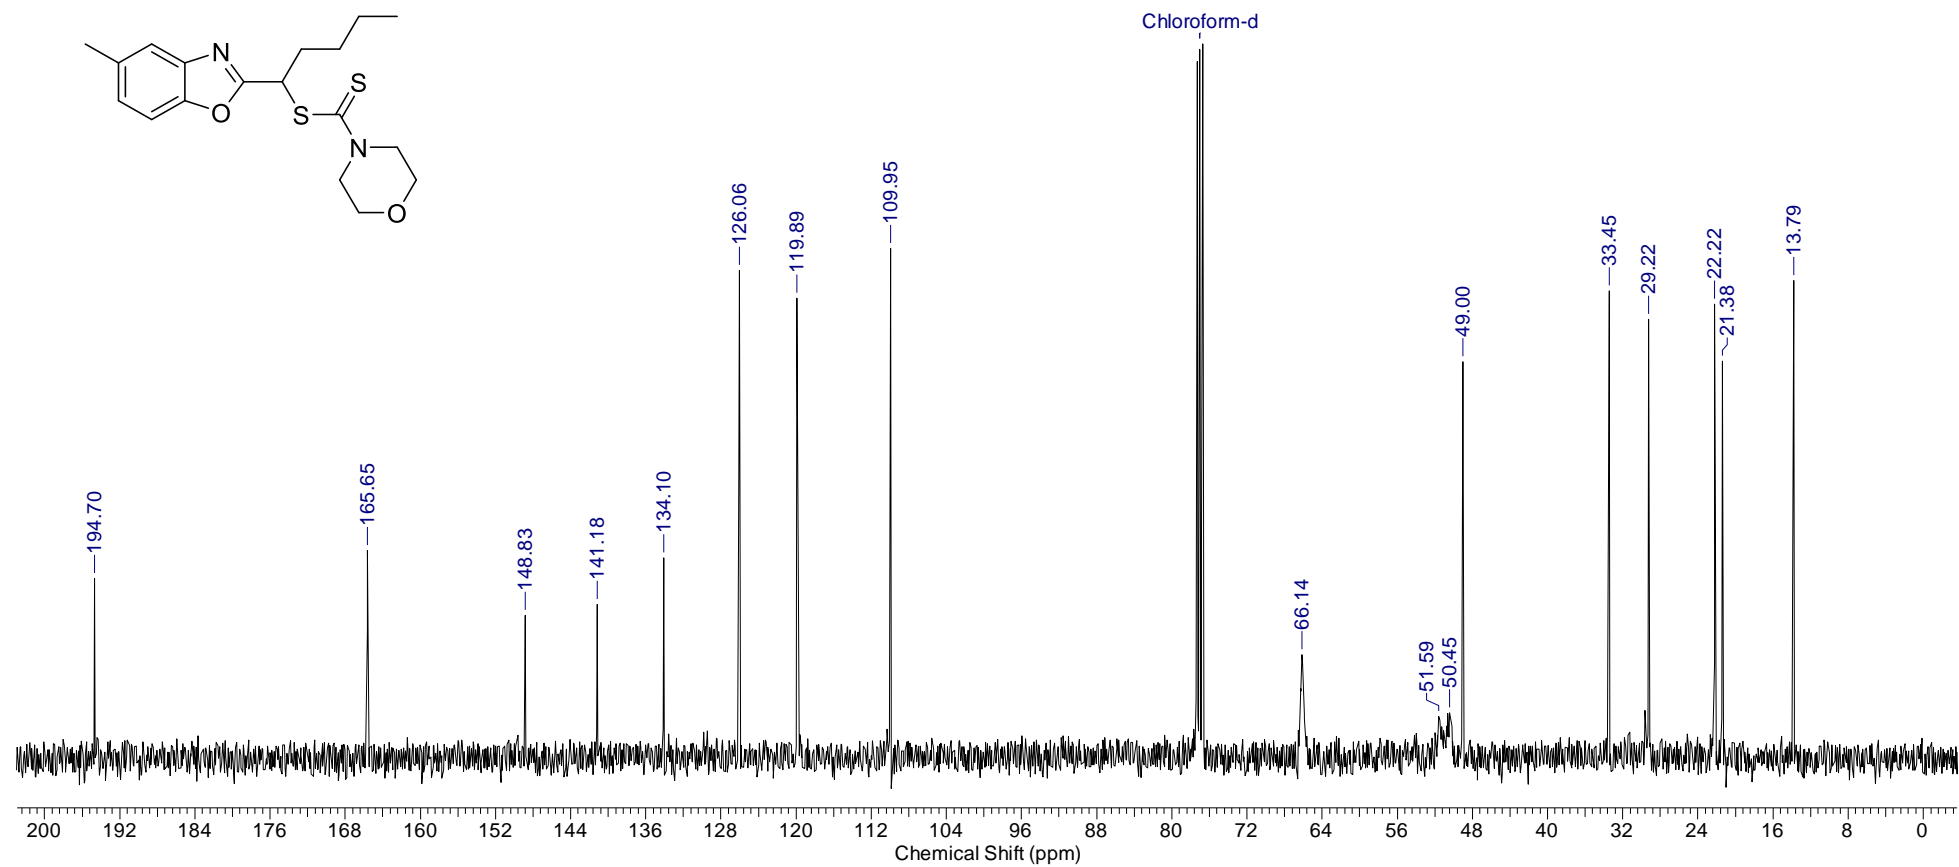

1-(5-Chloro-1,3-benzoxazol-2-yl)pentyl morpholine-4-carbodithioate (3m)

<sup>1</sup>H NMR (400 MHz, CDCl<sub>3</sub>)

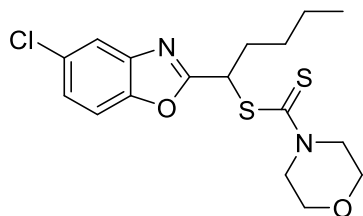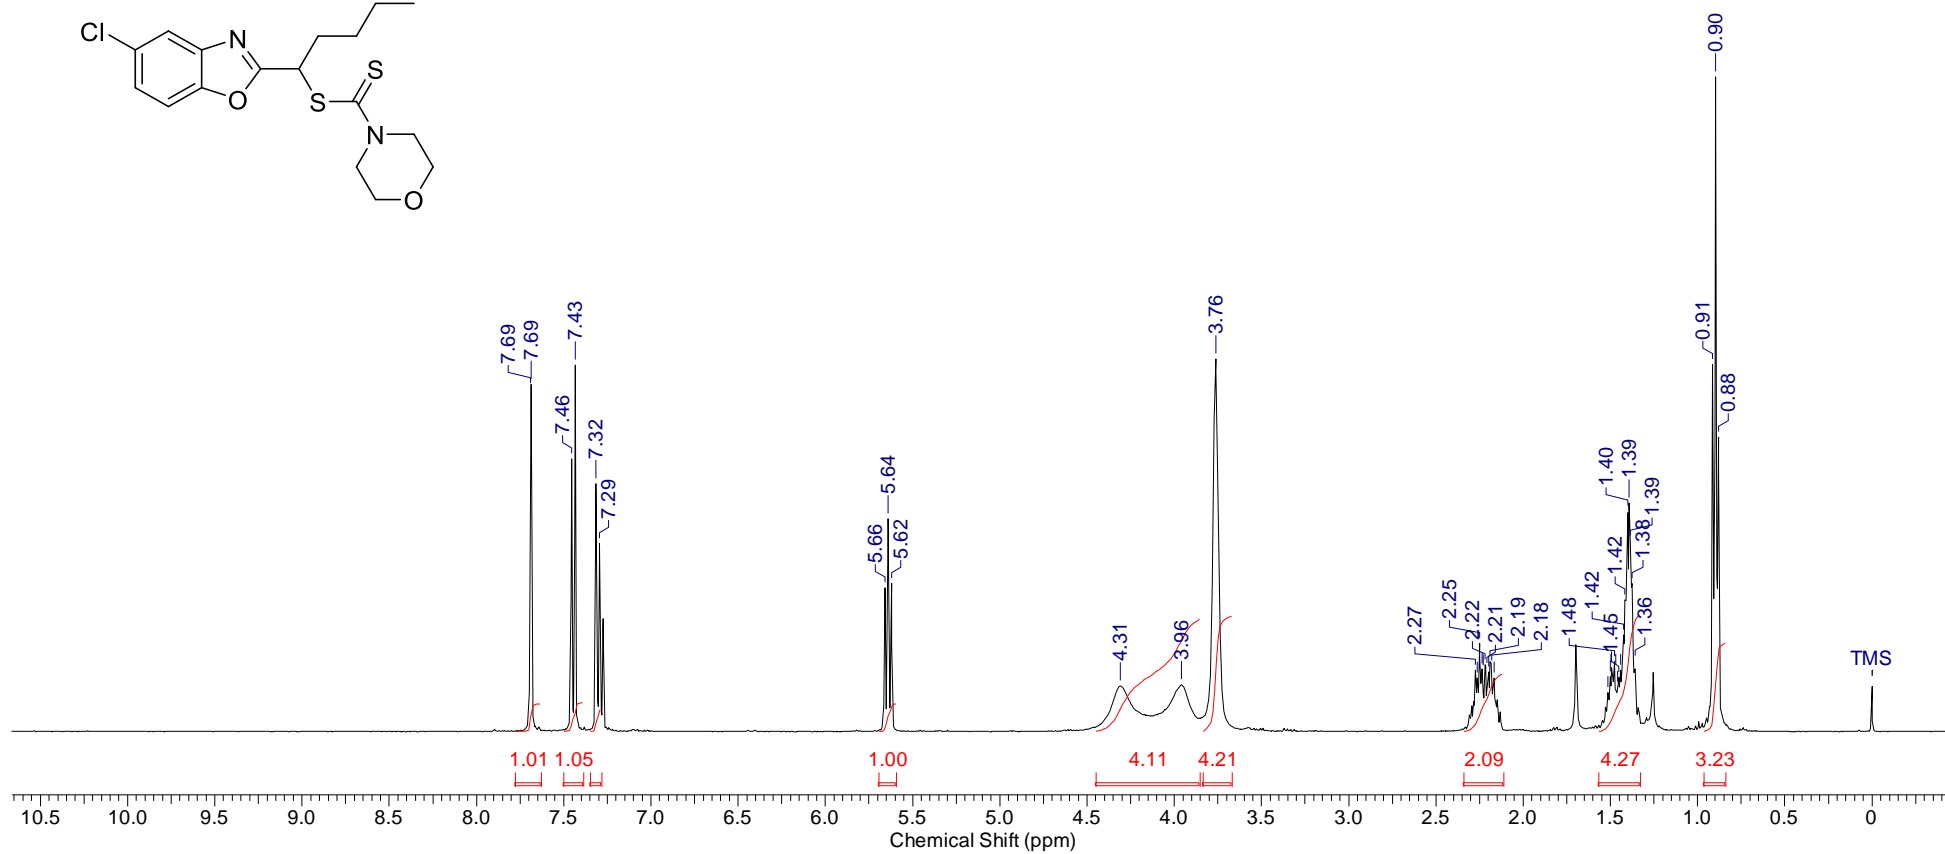

**1-(5-Chloro-1,3-benzoxazol-2-yl)pentyl morpholine-4-carbodithioate (3m)**

$^{13}\text{C}$  NMR (100 MHz,  $\text{CDCl}_3$ )

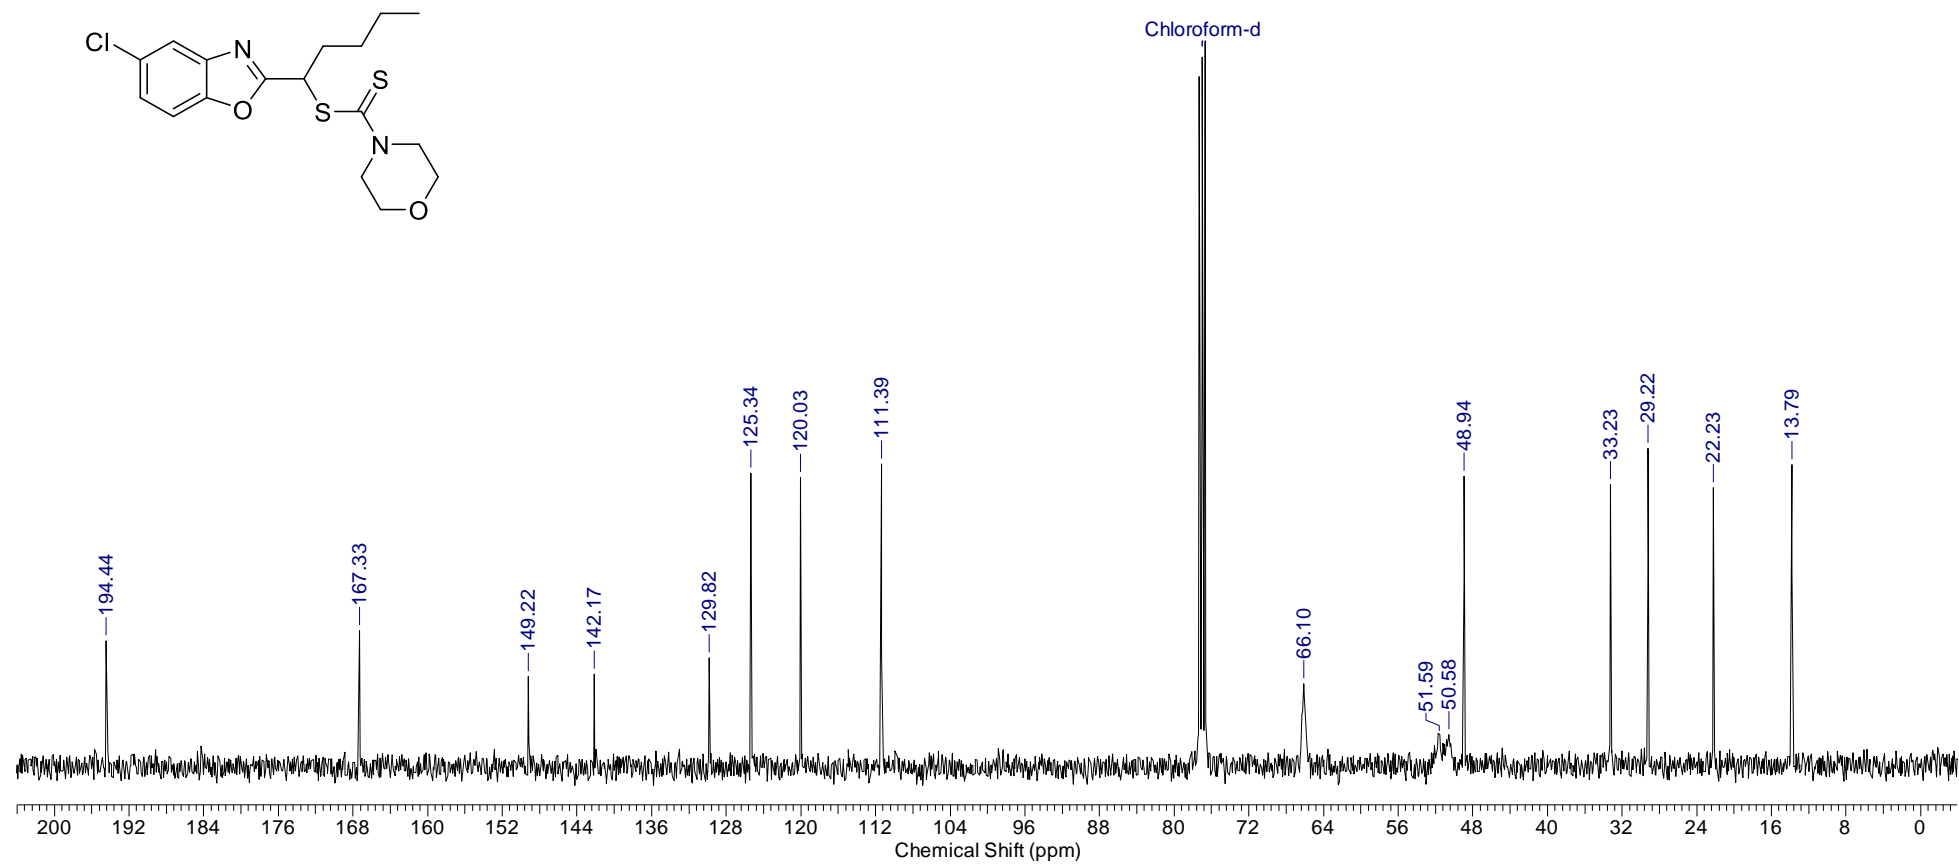



Methyl 2-{1-[(morpholin-4-ylcarbonothioyl)thio]pentyl}-1,3-benzoxazole-5-carboxylate (3n)

$^1\text{H}$  NMR (400 MHz,  $\text{CDCl}_3$ )

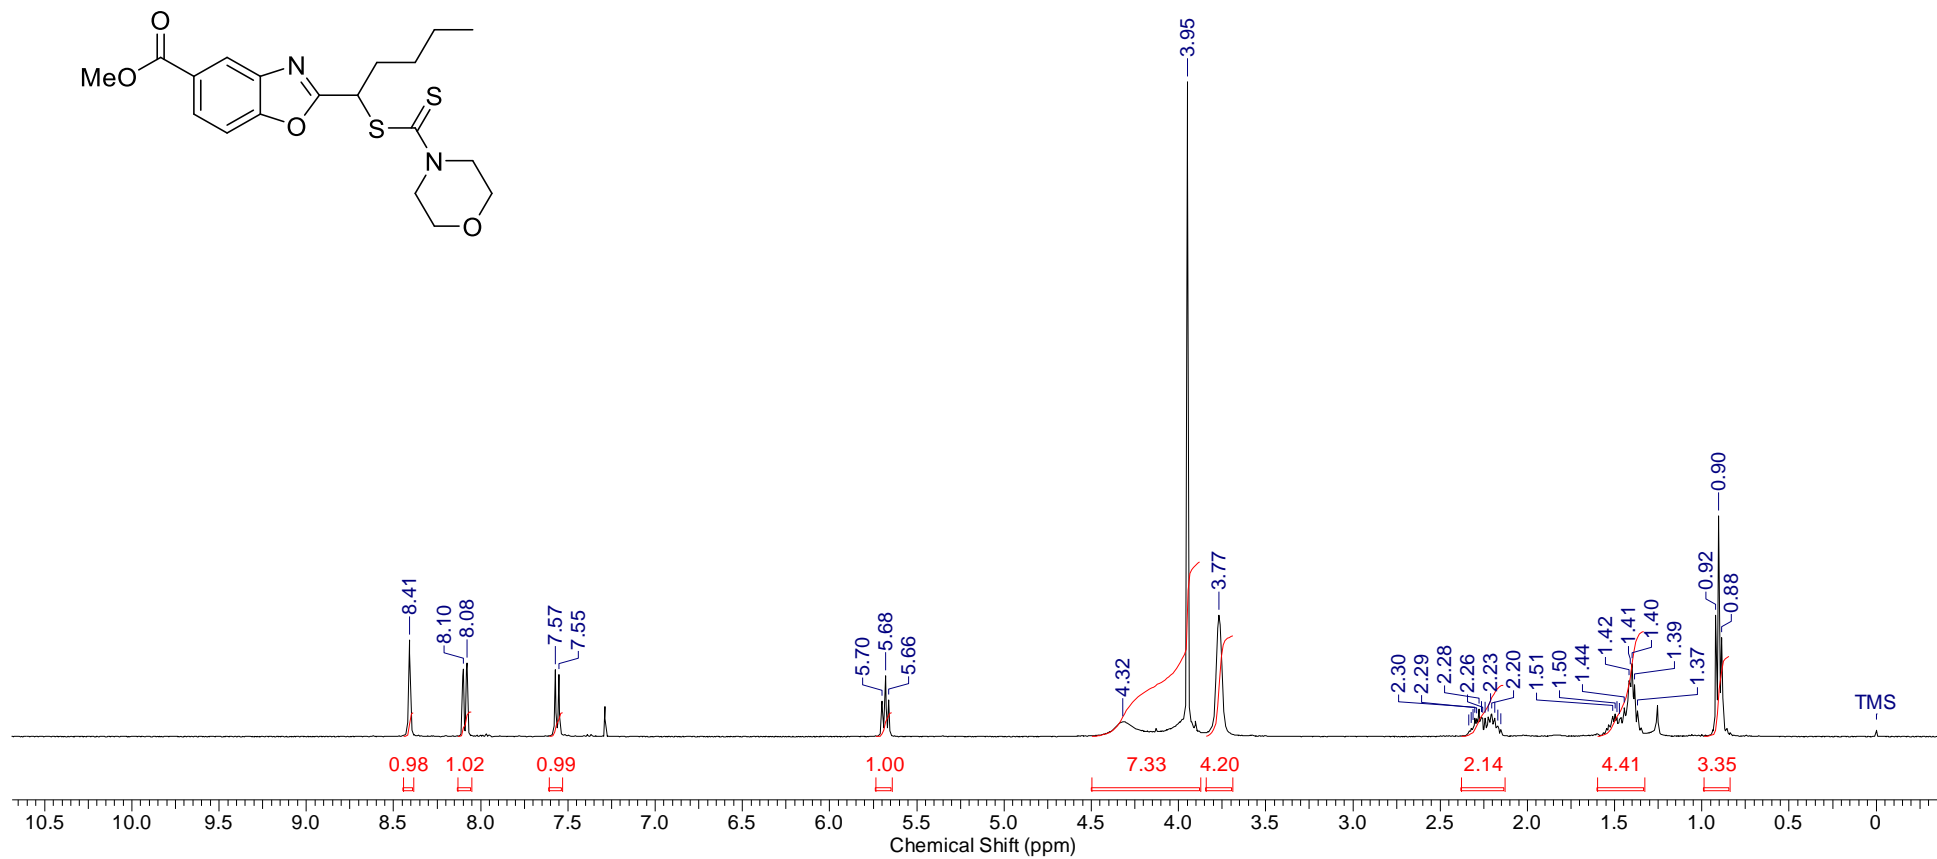

Methyl 2-{1-[(morpholin-4-ylcarbonothioyl)thio]pentyl}-1,3-benzoxazole-5-carboxylate (3n)

$^{13}\text{C}$  NMR (100 MHz,  $\text{CDCl}_3$ )

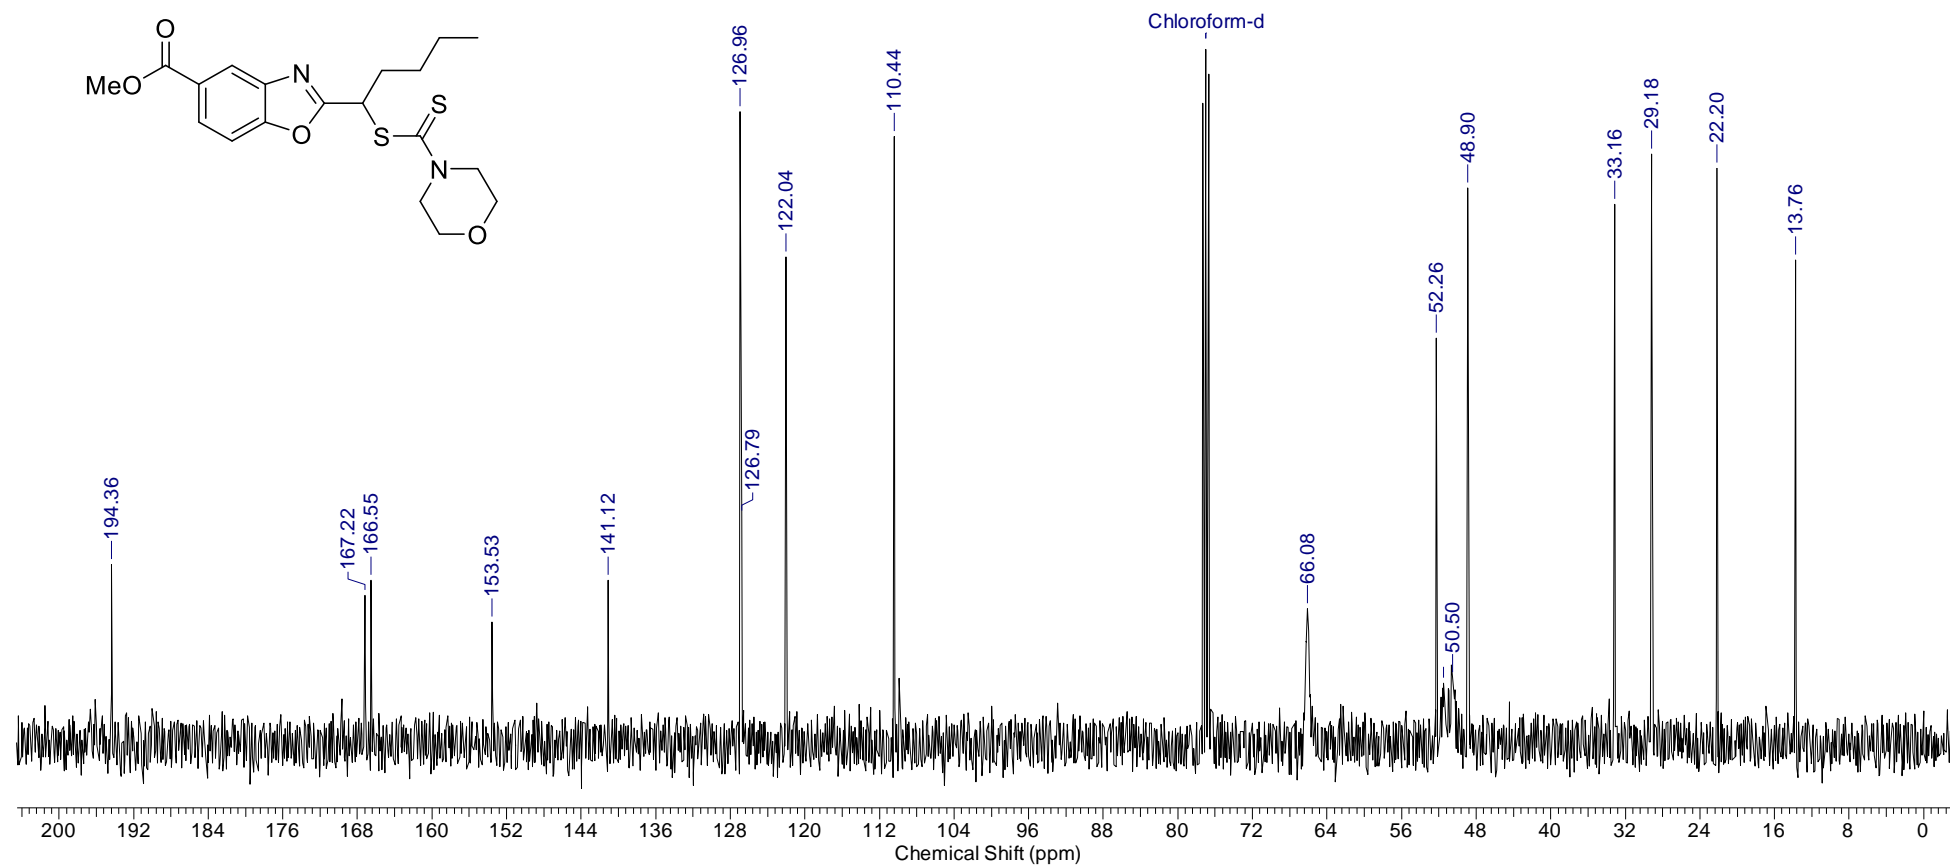

1-(5,7-Dichloro-6-methyl-1,3-benzoxazol-2-yl)pentyl morpholine-4-carbodithioate (3o)

$^1\text{H}$  NMR (400 MHz,  $\text{CDCl}_3$ )

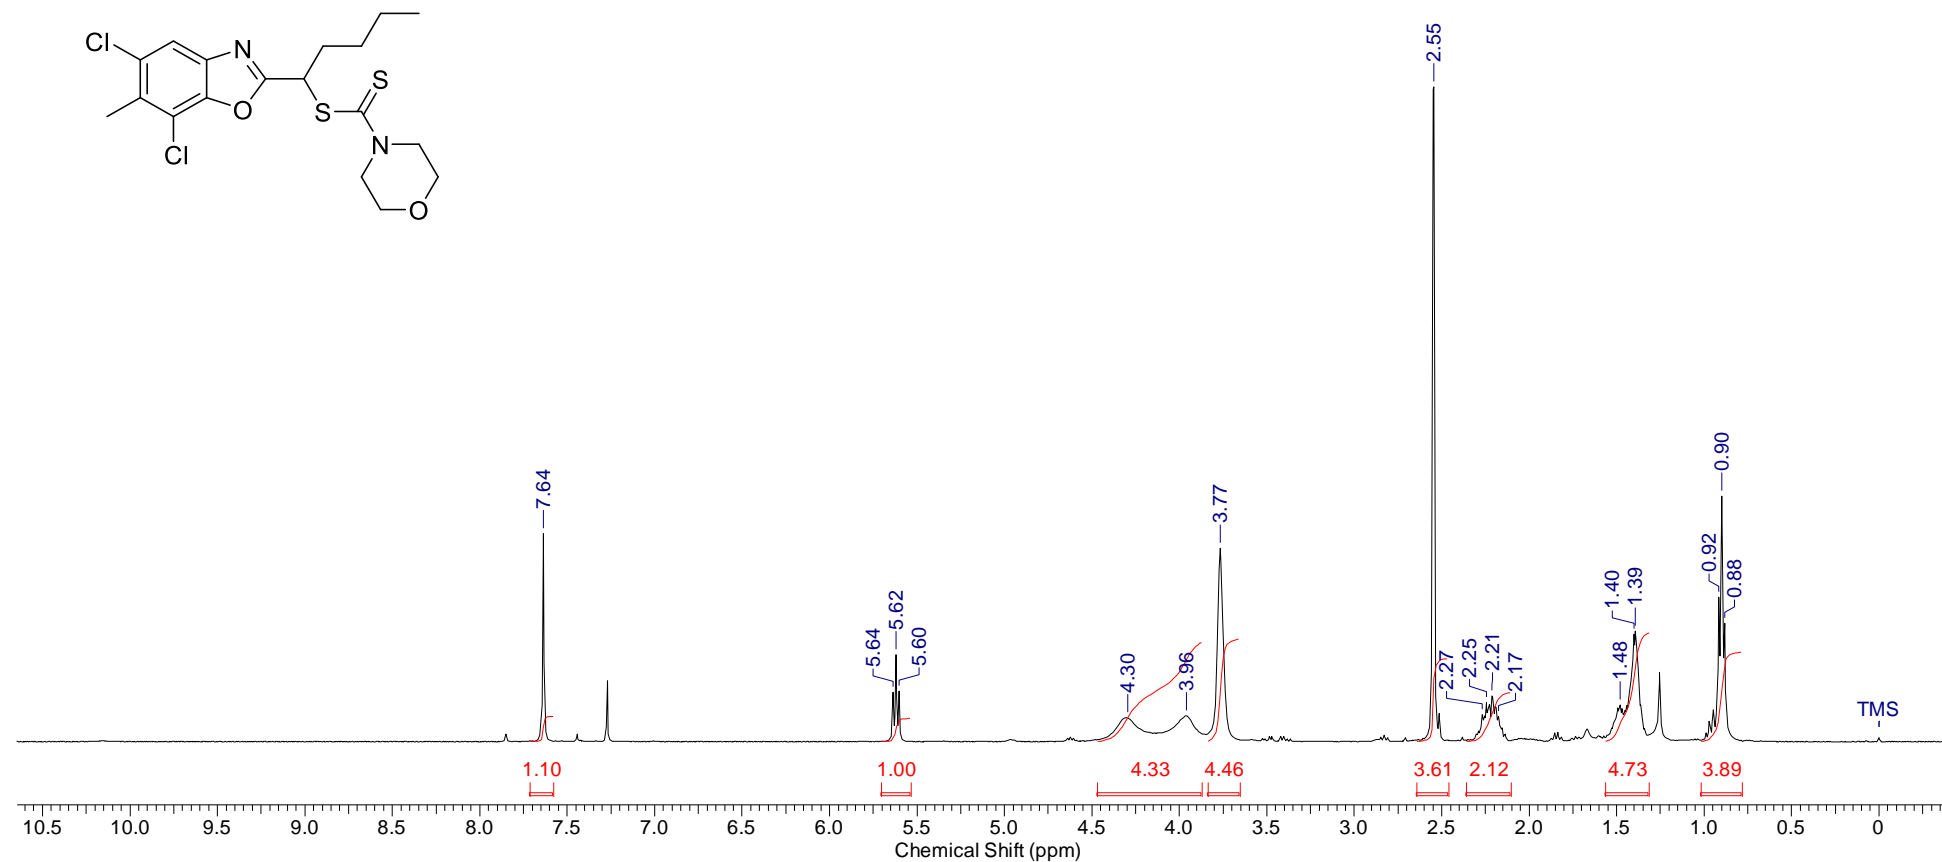

**1-(5,7-Dichloro-6-methyl-1,3-benzoxazol-2-yl)pentyl morpholine-4-carbodithioate (3o)**

$^{13}\text{C}$  NMR (100 MHz,  $\text{CDCl}_3$ )

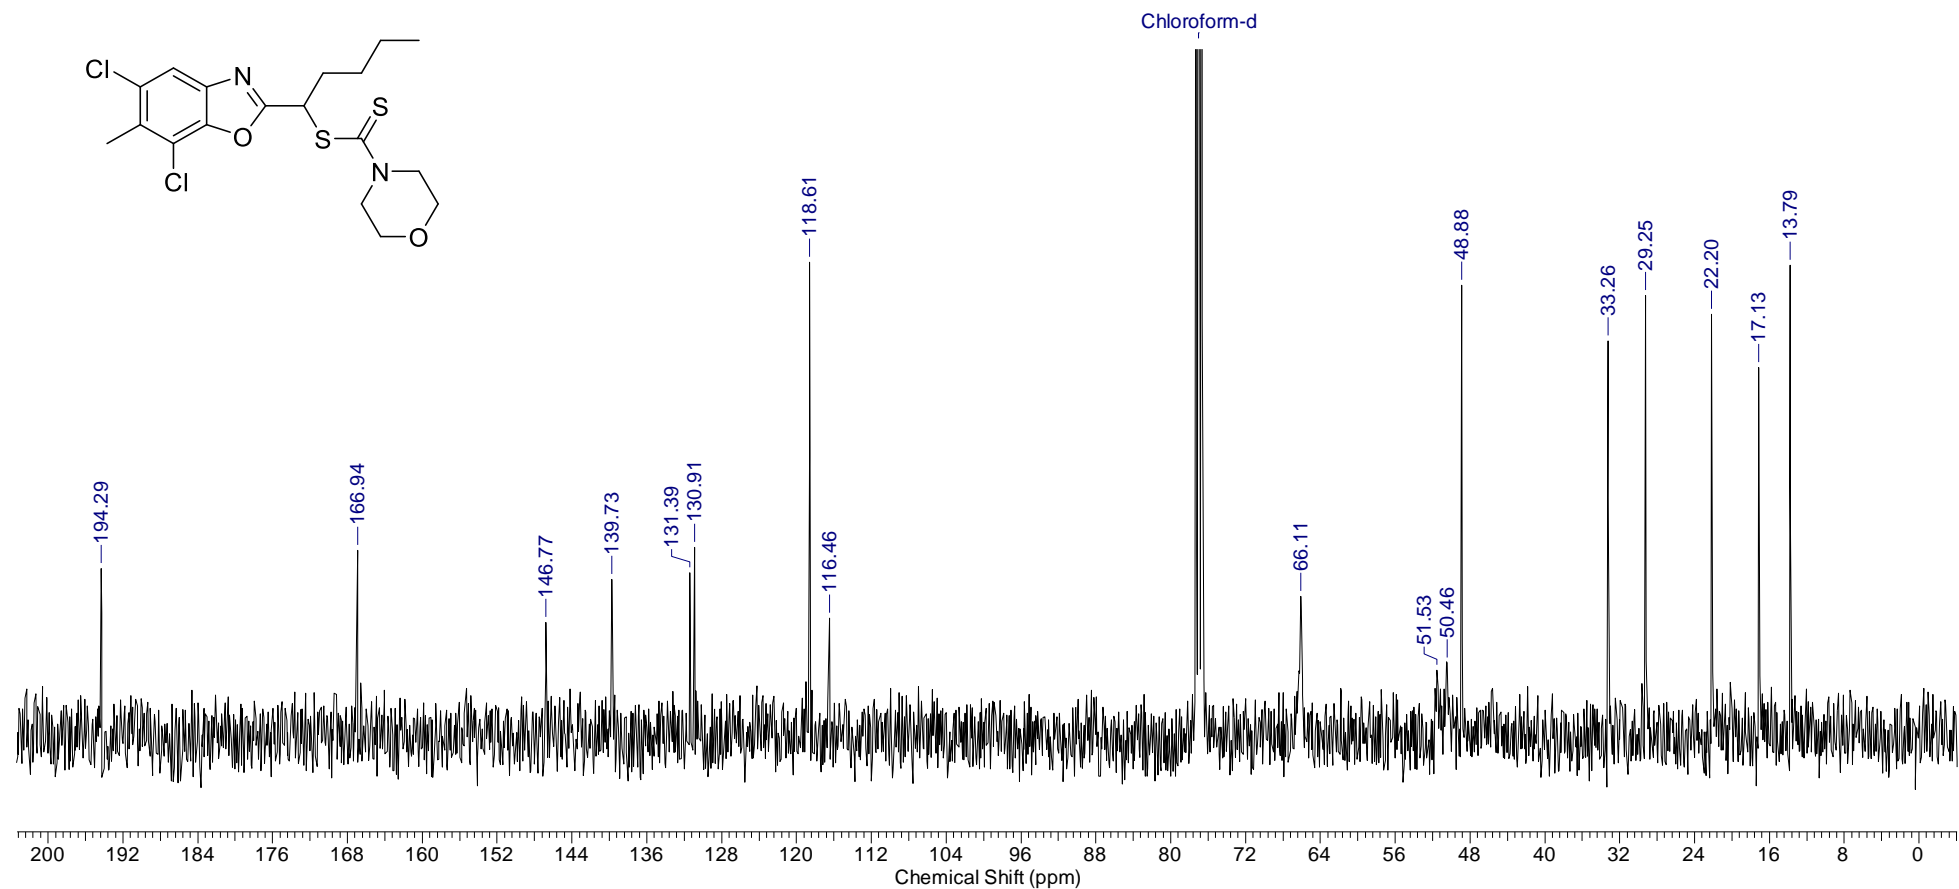

### 1-(7-Acetyl-1,3-benzoxazol-2-yl)pentyl morpholine-4-carbodithioate (3q)

<sup>1</sup>H NMR (400 MHz, CDCl<sub>3</sub>)

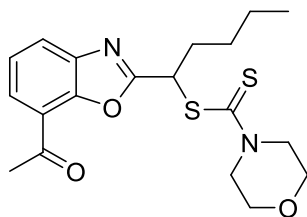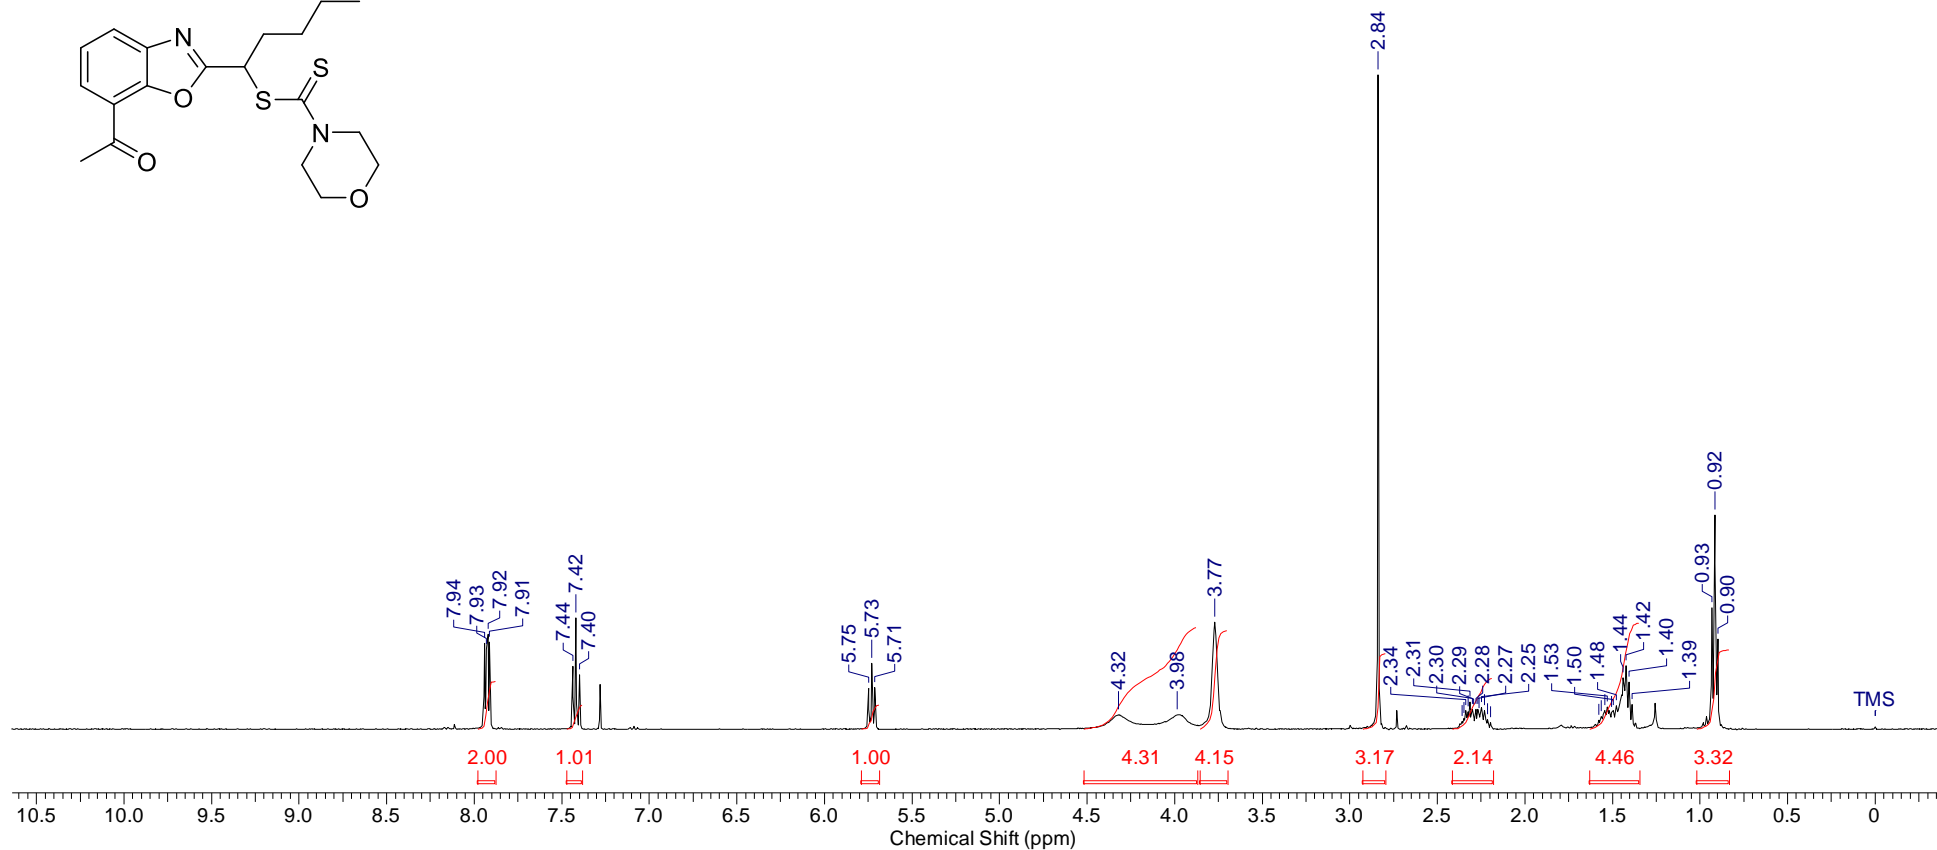

### 1-(7-Acetyl-1,3-benzoxazol-2-yl)pentyl morpholine-4-carbodithioate (3q)

$^{13}\text{C}$  NMR (100 MHz,  $\text{CDCl}_3$ )

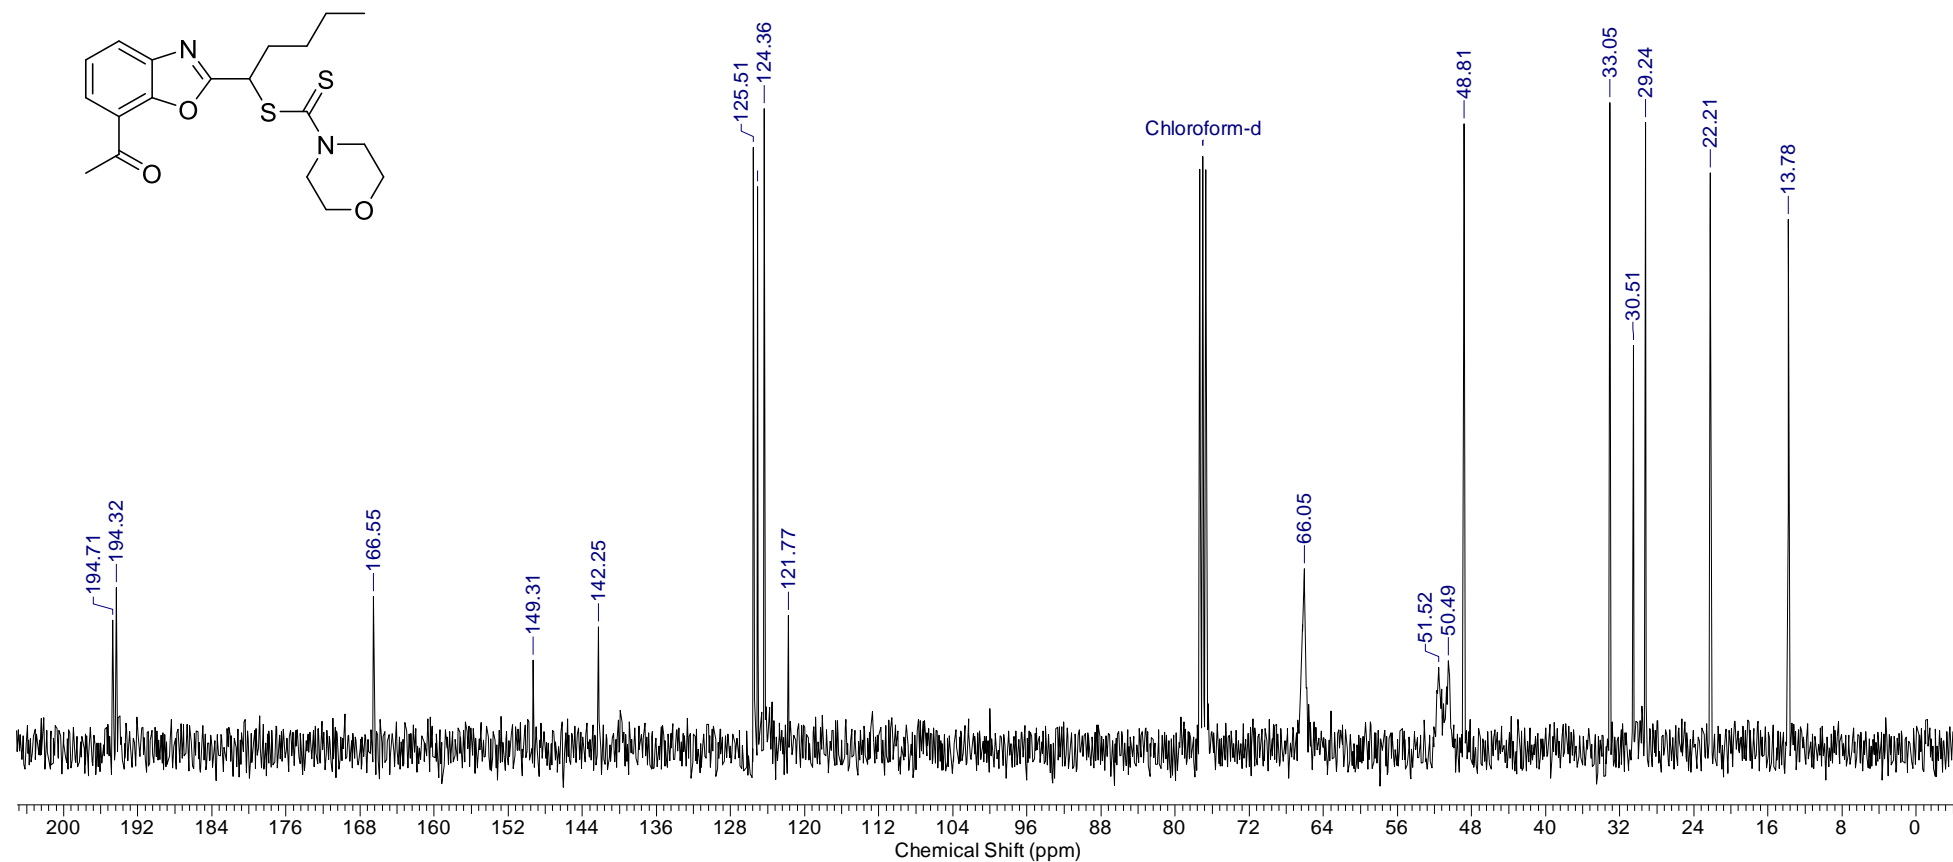

**1-(1,3-Benzoxazol-2-yl)-4-methylpentyl morpholine-4-carbodithioate (3r)**

$^1\text{H}$  NMR (400 MHz,  $\text{CDCl}_3$ )

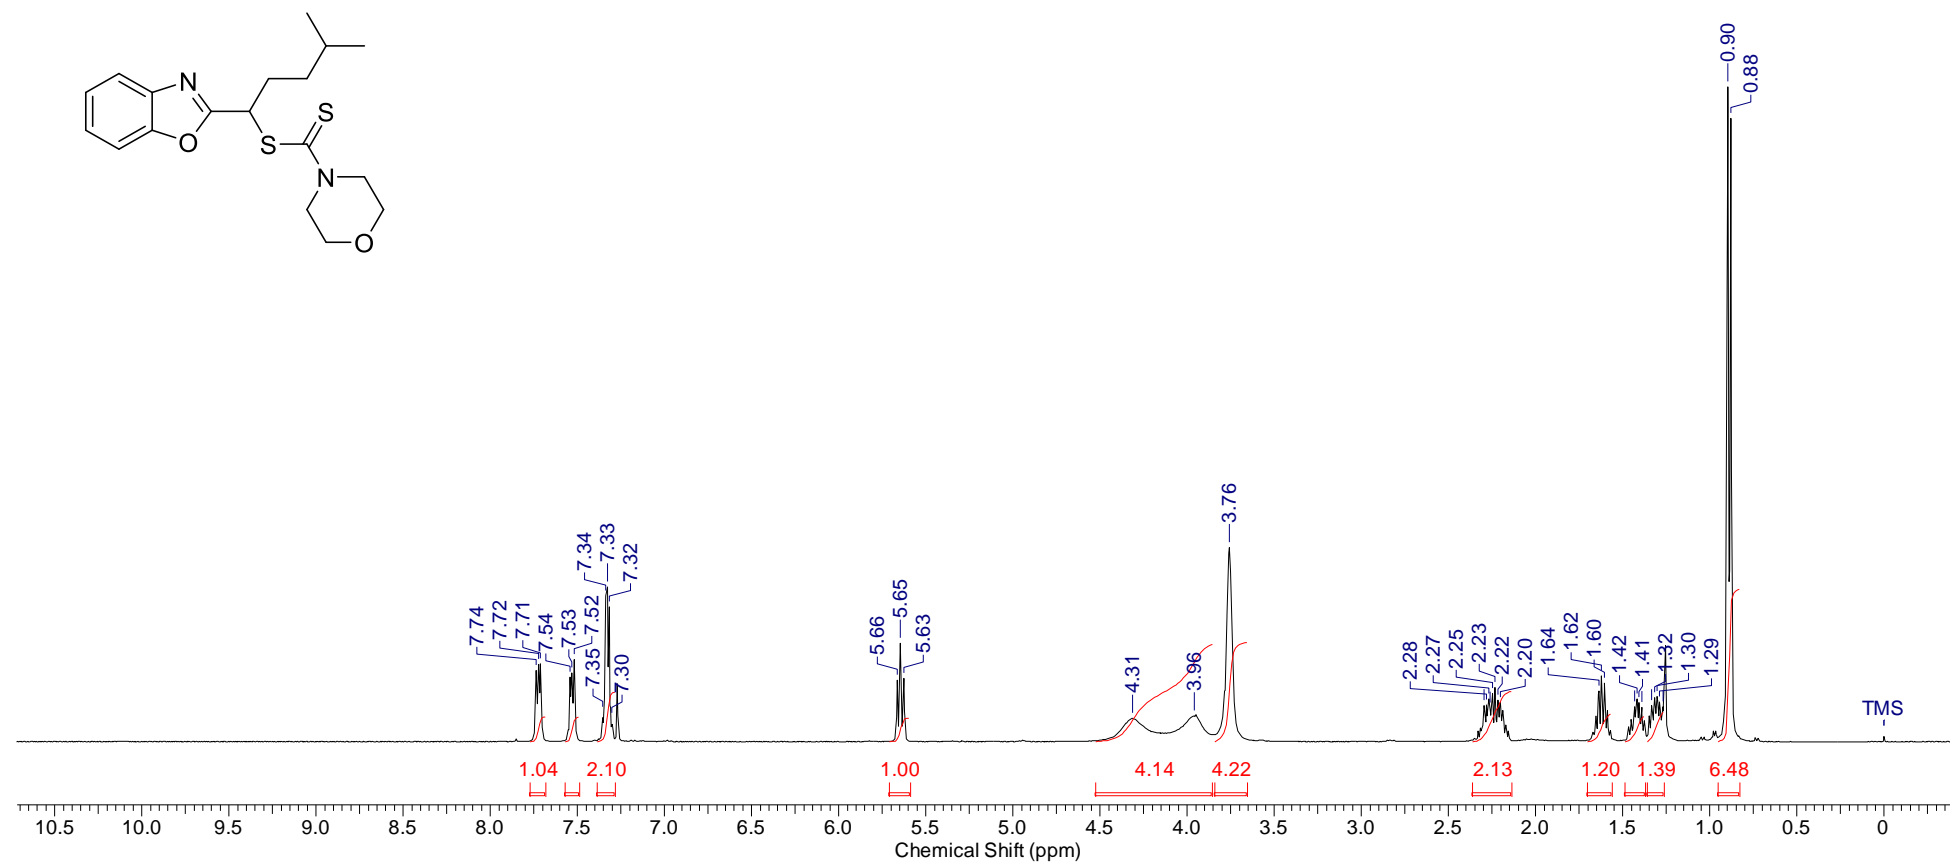

### 1-(1,3-Benzoxazol-2-yl)-4-methylpentyl morpholine-4-carbodithioate (3r)

$^{13}\text{C}$  NMR (100 MHz,  $\text{CDCl}_3$ )

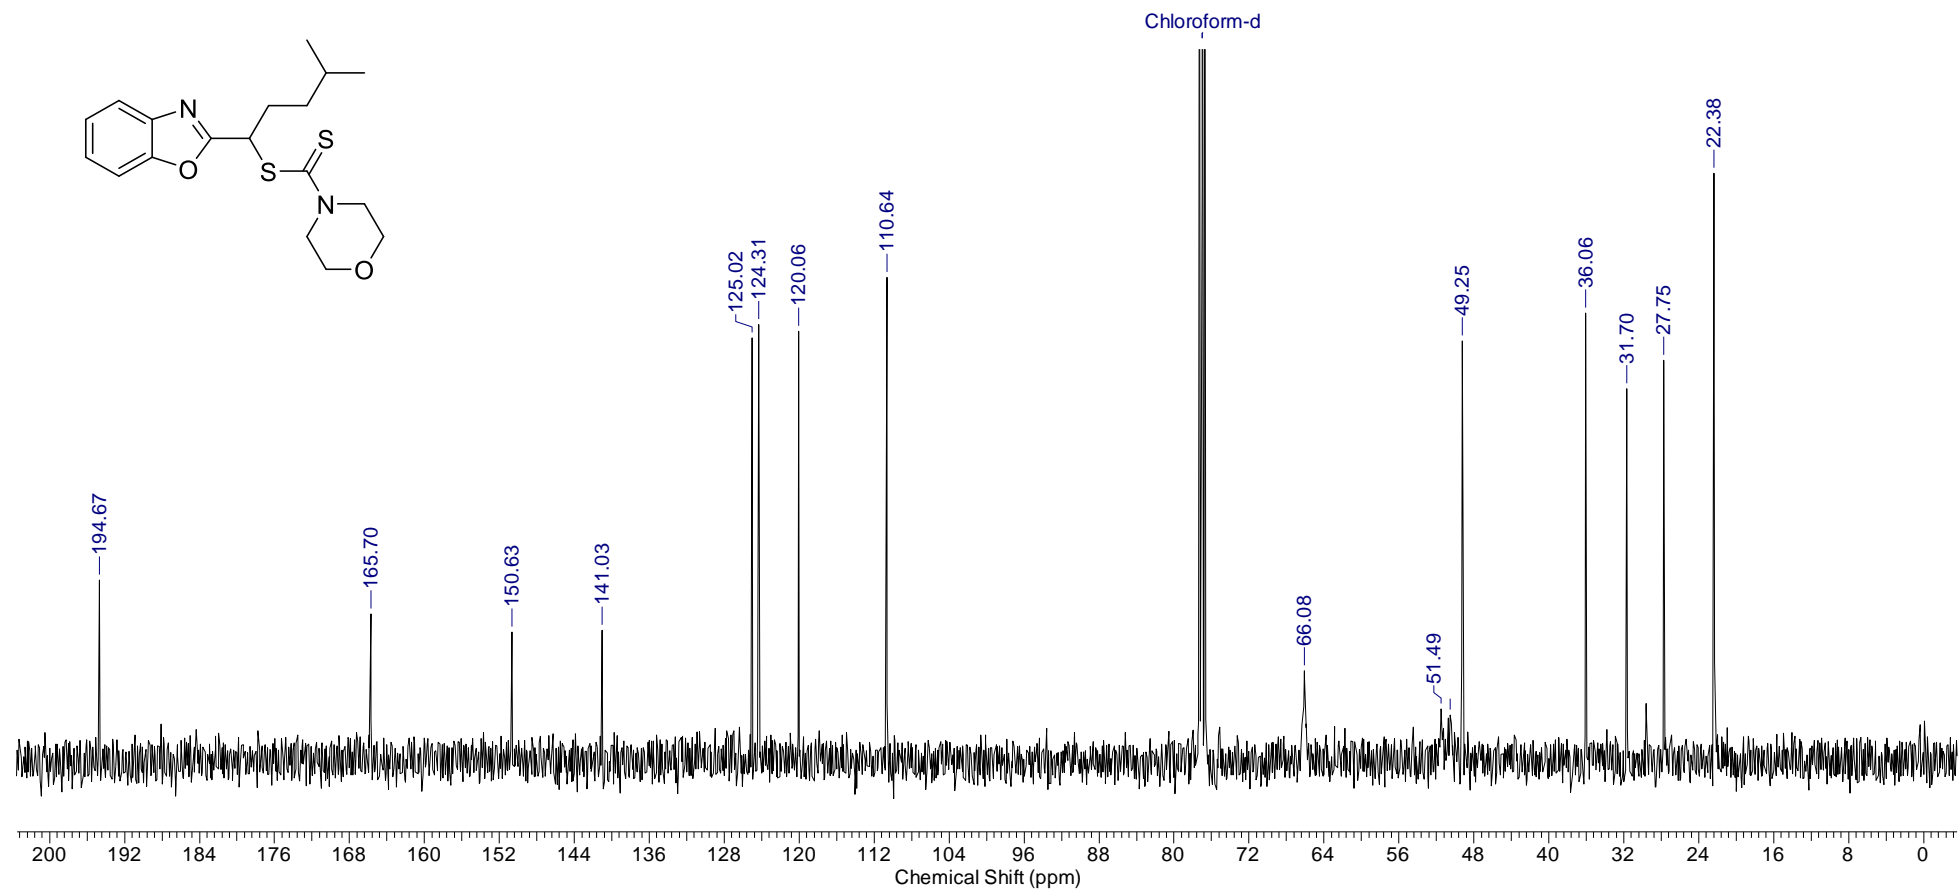



1-(1,3-Benzoxazol-2-yl)-2-cyclohexylethyl morpholine-4-carbodithioate (3s)

<sup>1</sup>H NMR (400 MHz, CDCl<sub>3</sub>)

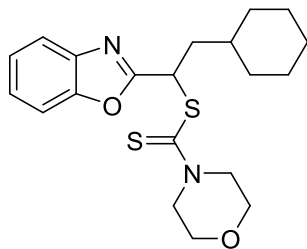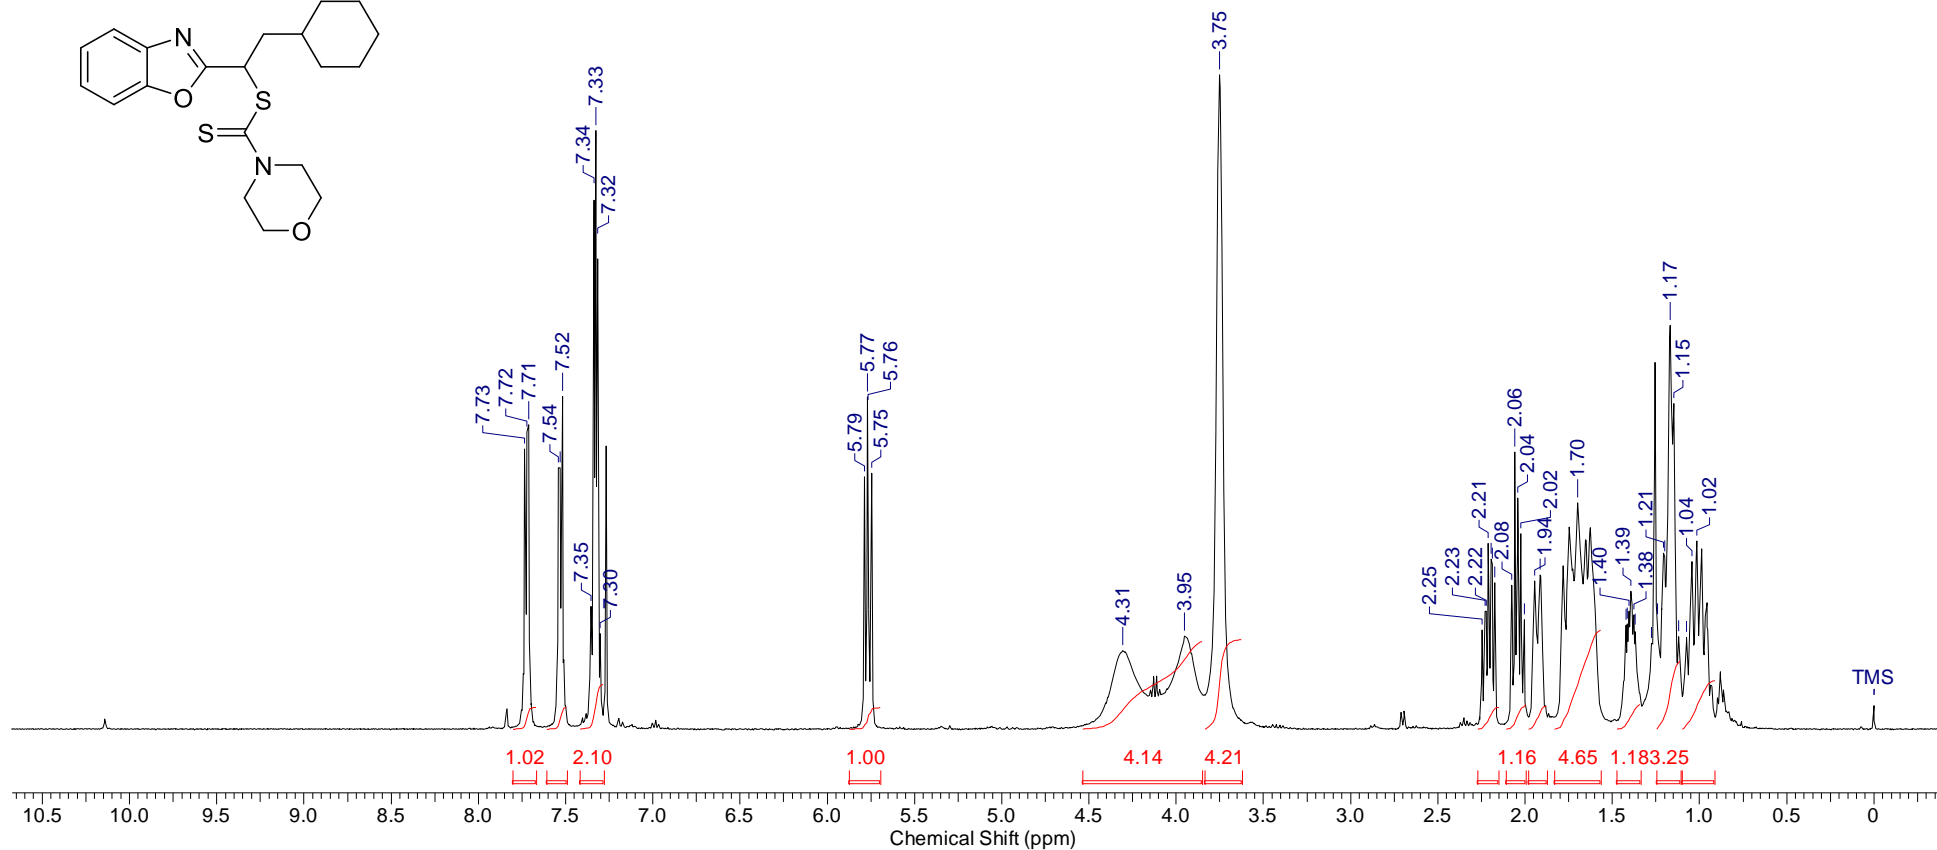

### 1-(1,3-Benzoxazol-2-yl)-2-cyclohexylethyl morpholine-4-carbodithioate (3s)

$^{13}\text{C}$  NMR (100 MHz,  $\text{CDCl}_3$ )

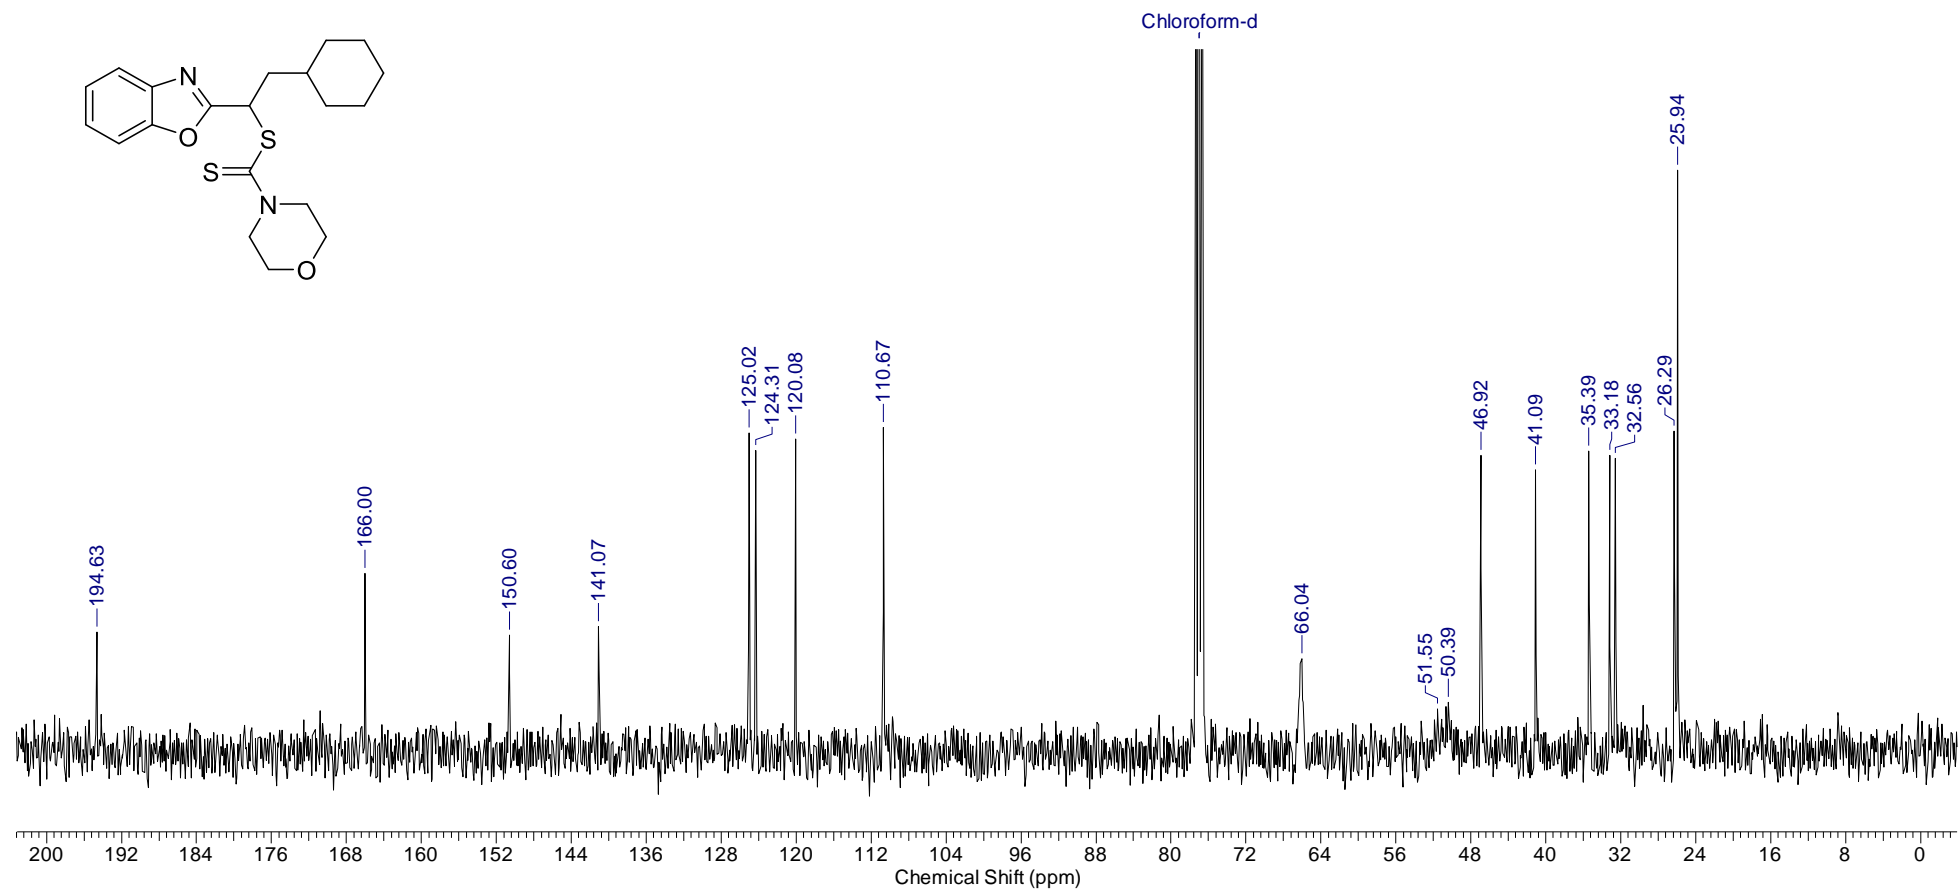

1-(1,3-Benzoxazol-2-yl)-3-phenylpropyl morpholine-4-carbodithioate (3t)

$^1\text{H}$  NMR (400 MHz,  $\text{CDCl}_3$ )

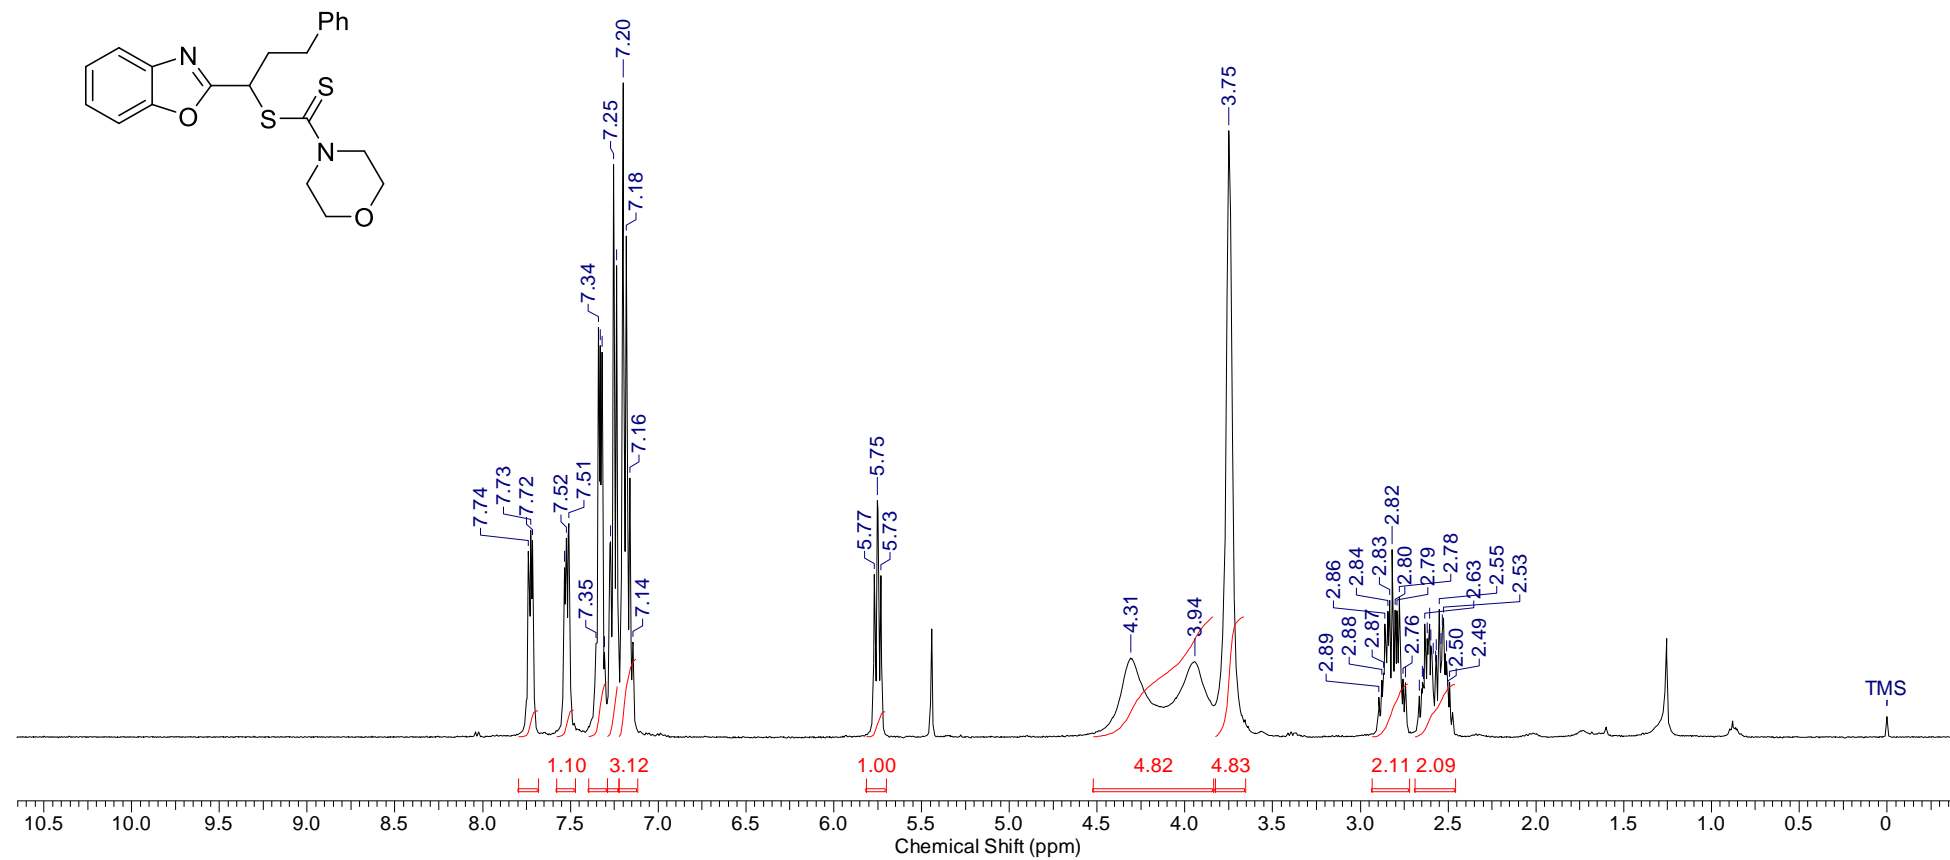

**1-(1,3-Benzoxazol-2-yl)-3-phenylpropyl morpholine-4-carbodithioate (3t)**

$^{13}\text{C}$  NMR (100 MHz,  $\text{CDCl}_3$ )

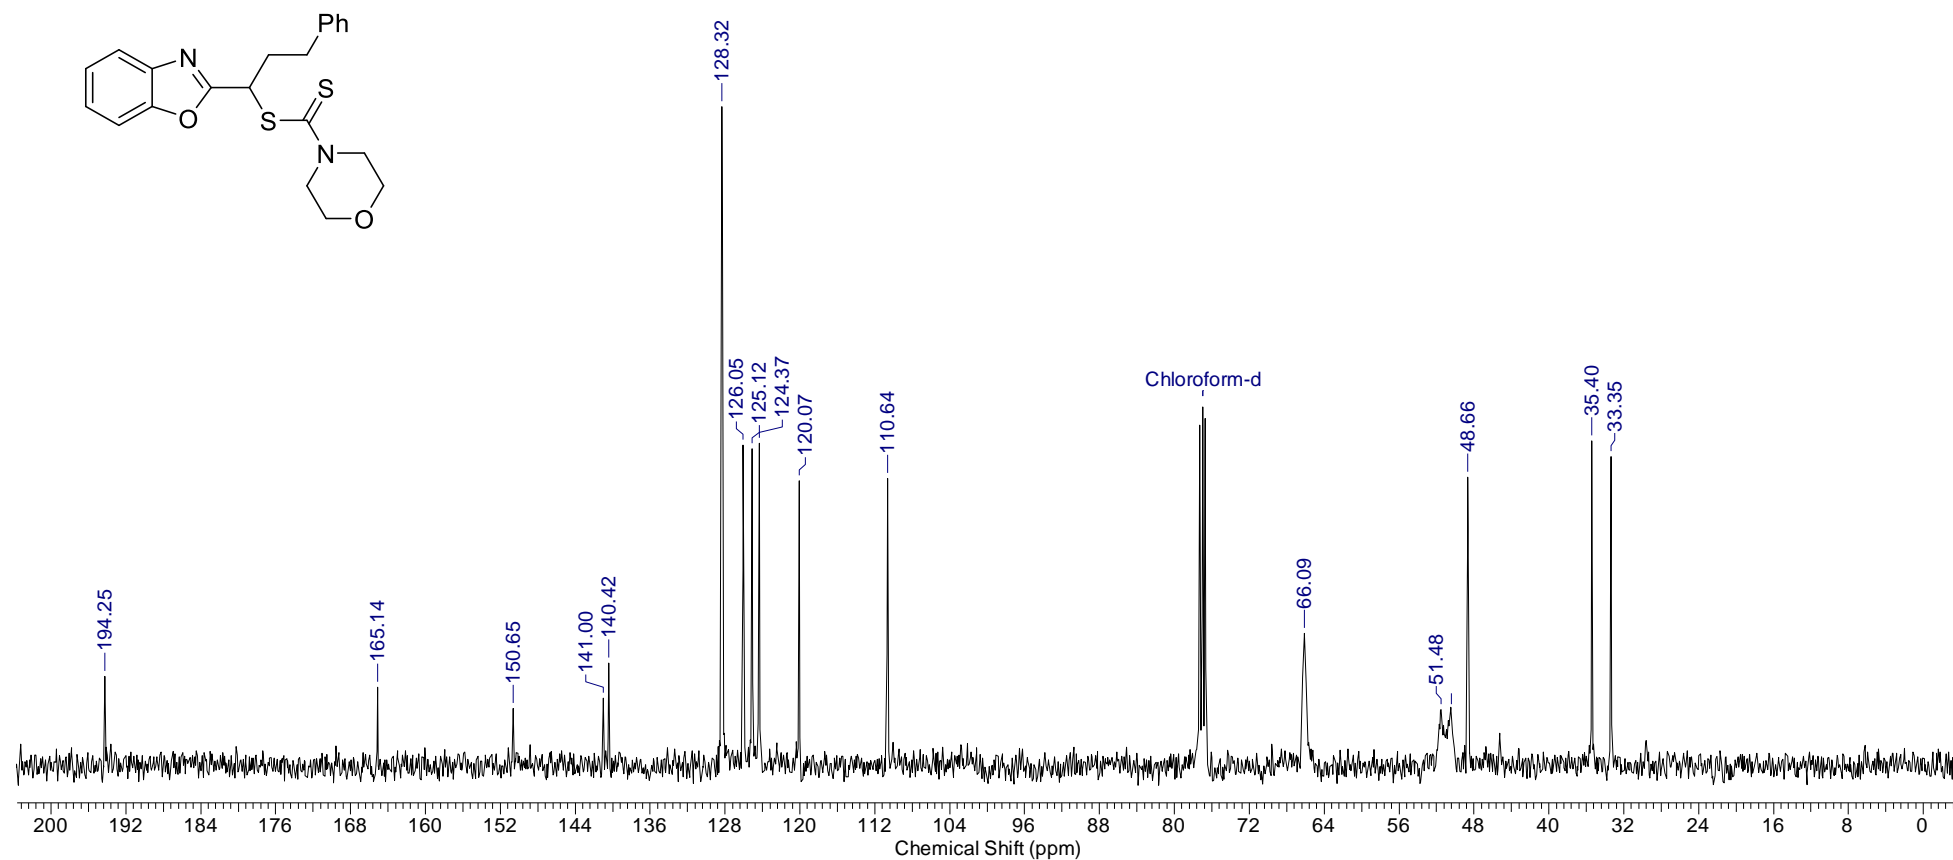

Methyl 5-(1,3-benzoxazol-2-yl)-5-[(morpholin-4-ylcarbonothioyl)thio]pentanoate (3u)

<sup>1</sup>H NMR (400 MHz, CDCl<sub>3</sub>)

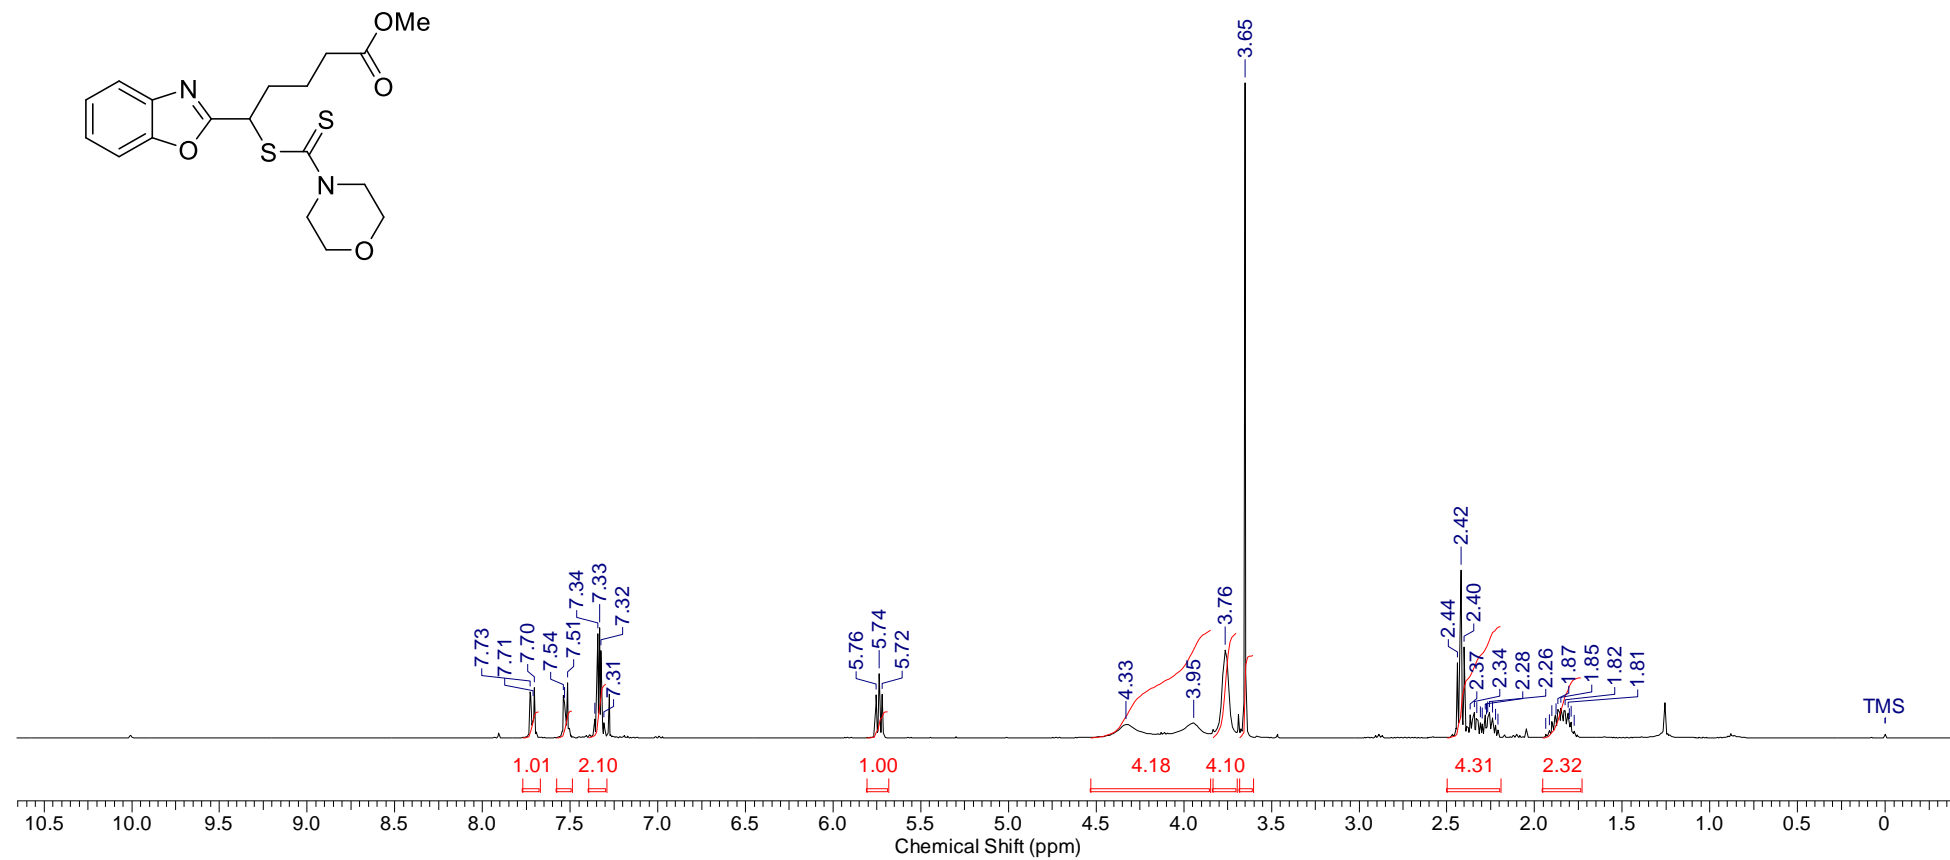

Methyl 5-(1,3-benzoxazol-2-yl)-5-[(morpholin-4-ylcarbonothioyl)thio]pentanoate (3u)

$^{13}\text{C}$  NMR (100 MHz,  $\text{CDCl}_3$ )

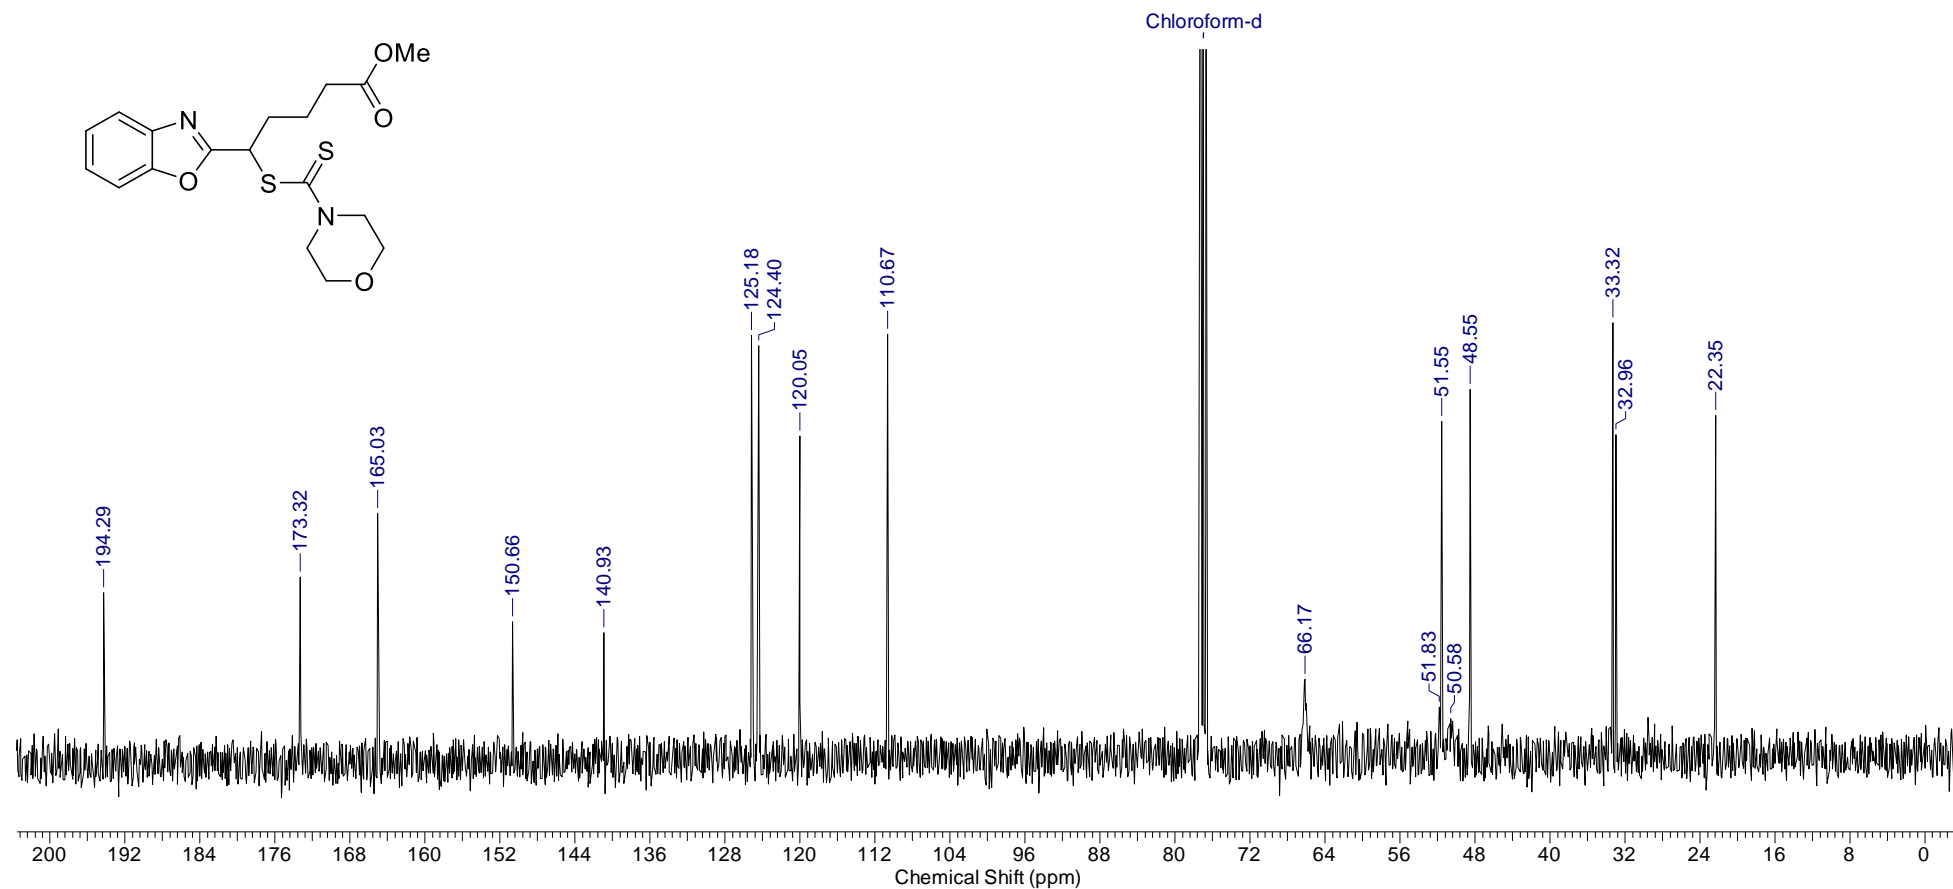

### 1-(1,3-Benzoxazol-2-yl)-3-hydroxypropyl morpholine-4-carbodithioate (3v)

$^1\text{H}$  NMR (400 MHz,  $\text{CDCl}_3$ )

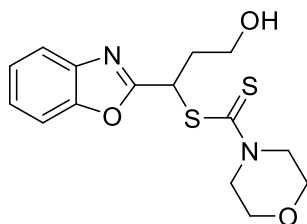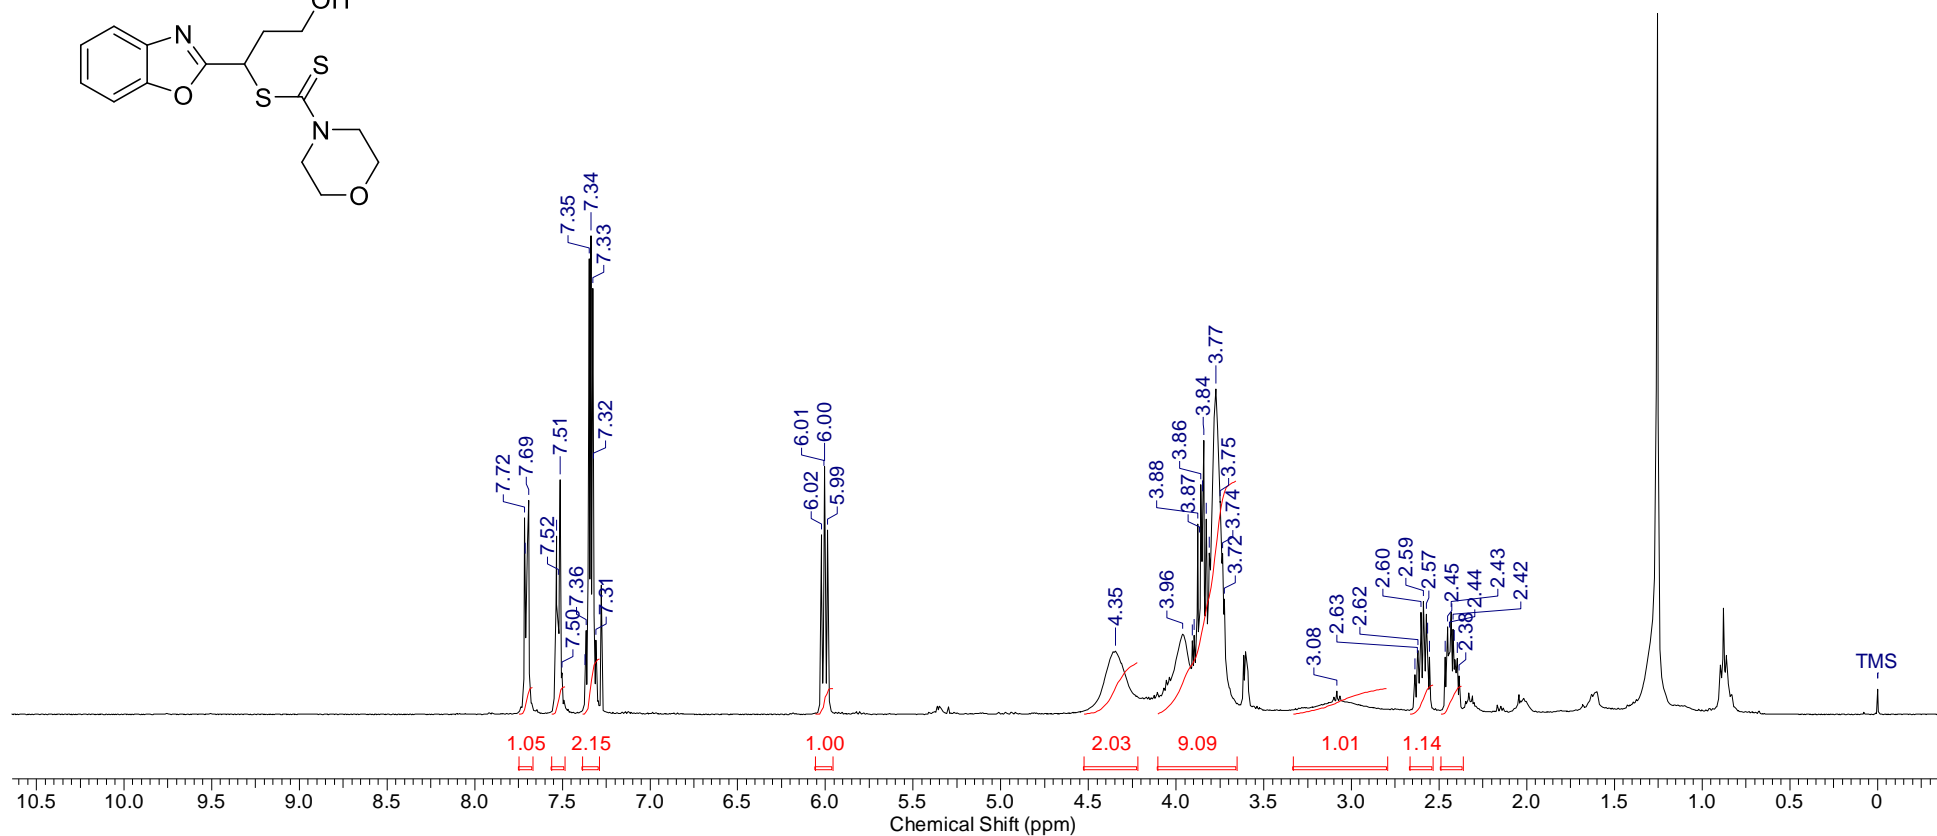

### 1-(1,3-Benzoxazol-2-yl)-3-hydroxypropyl morpholine-4-carbodithioate (3v)

$^{13}\text{C}$  NMR (100 MHz,  $\text{CDCl}_3$ )

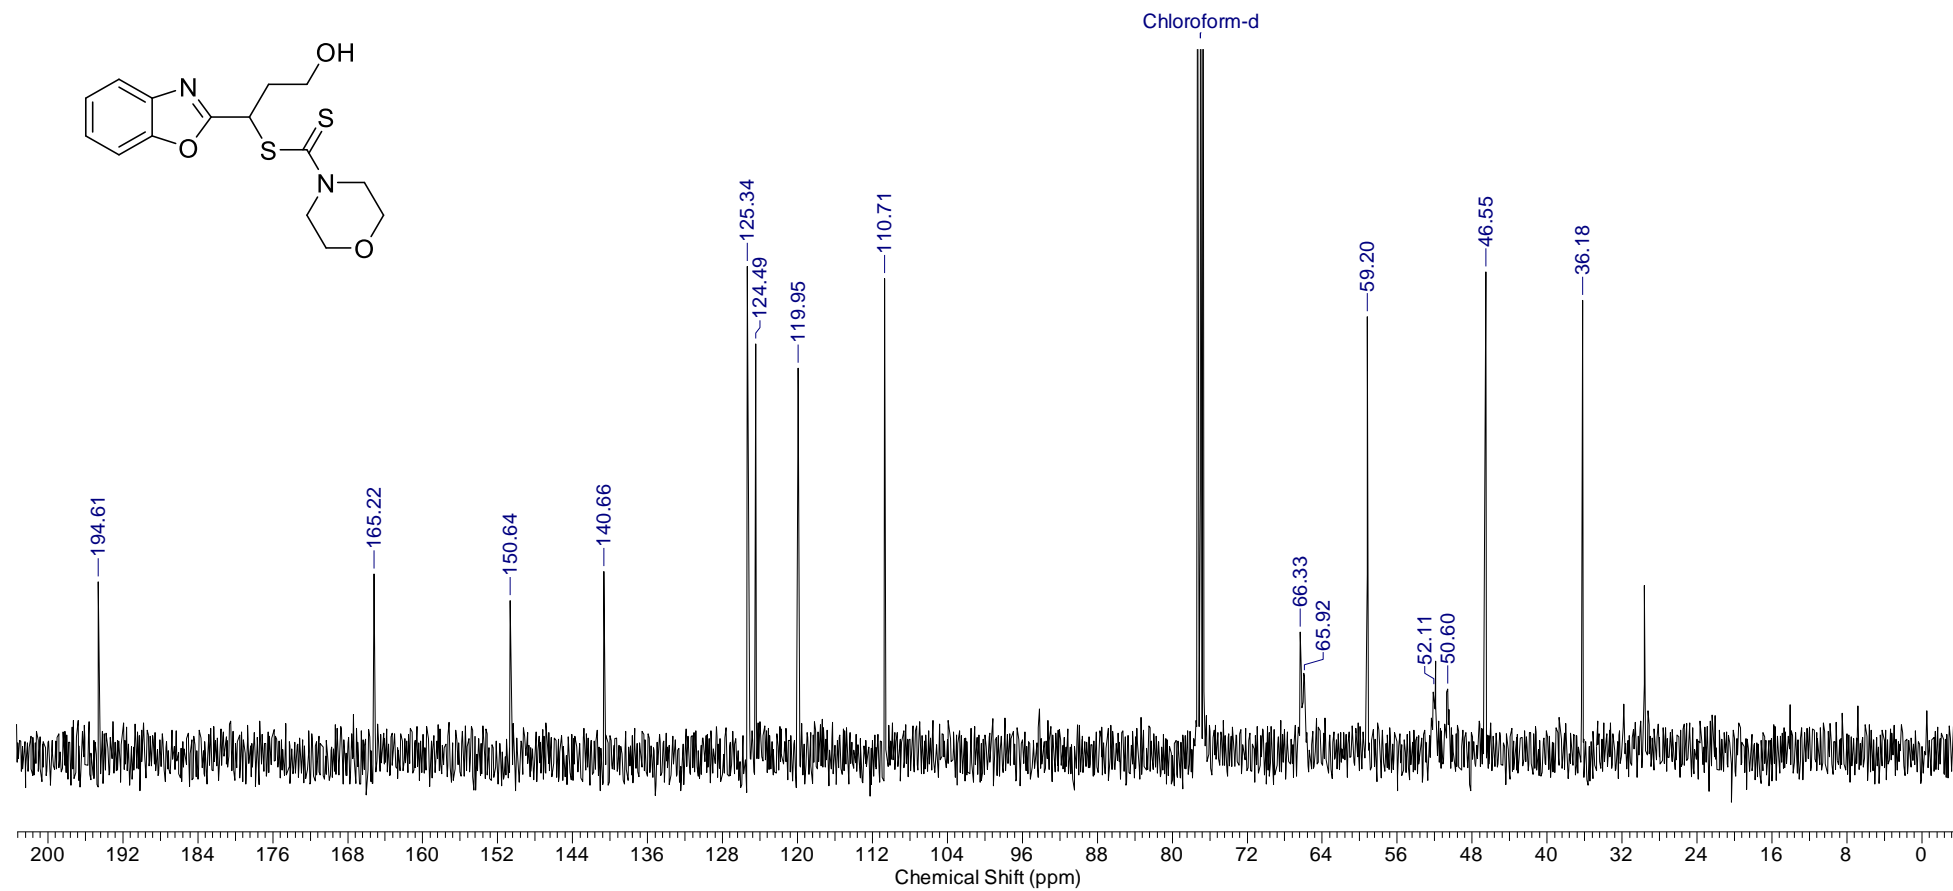



1-([2-(Morpholin-4-ylcarbonyl)phenyl]amino)carbonylpentyl morpholine-4-carbodithioate (11a)

<sup>1</sup>H NMR (400 MHz, CDCl<sub>3</sub>)

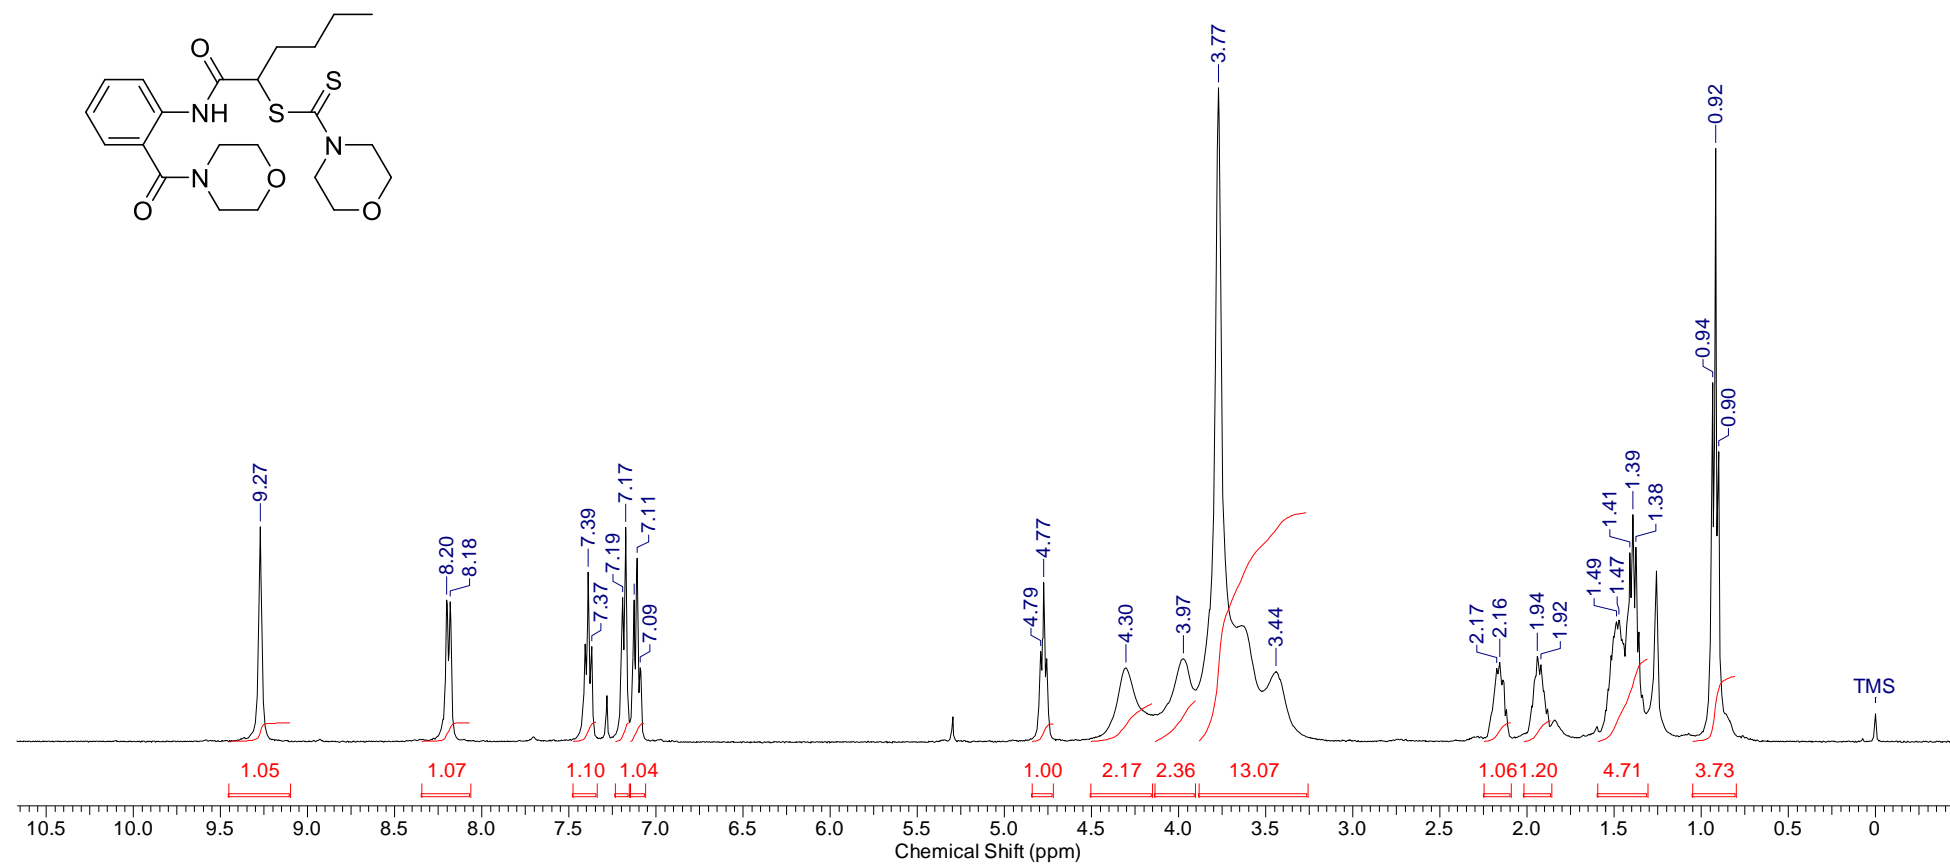

1-([2-(Morpholin-4-ylcarbonyl)phenyl]amino)carbonylpentyl morpholine-4-carbodithioate (11a)

$^{13}\text{C}$  NMR (100 MHz,  $\text{CDCl}_3$ )

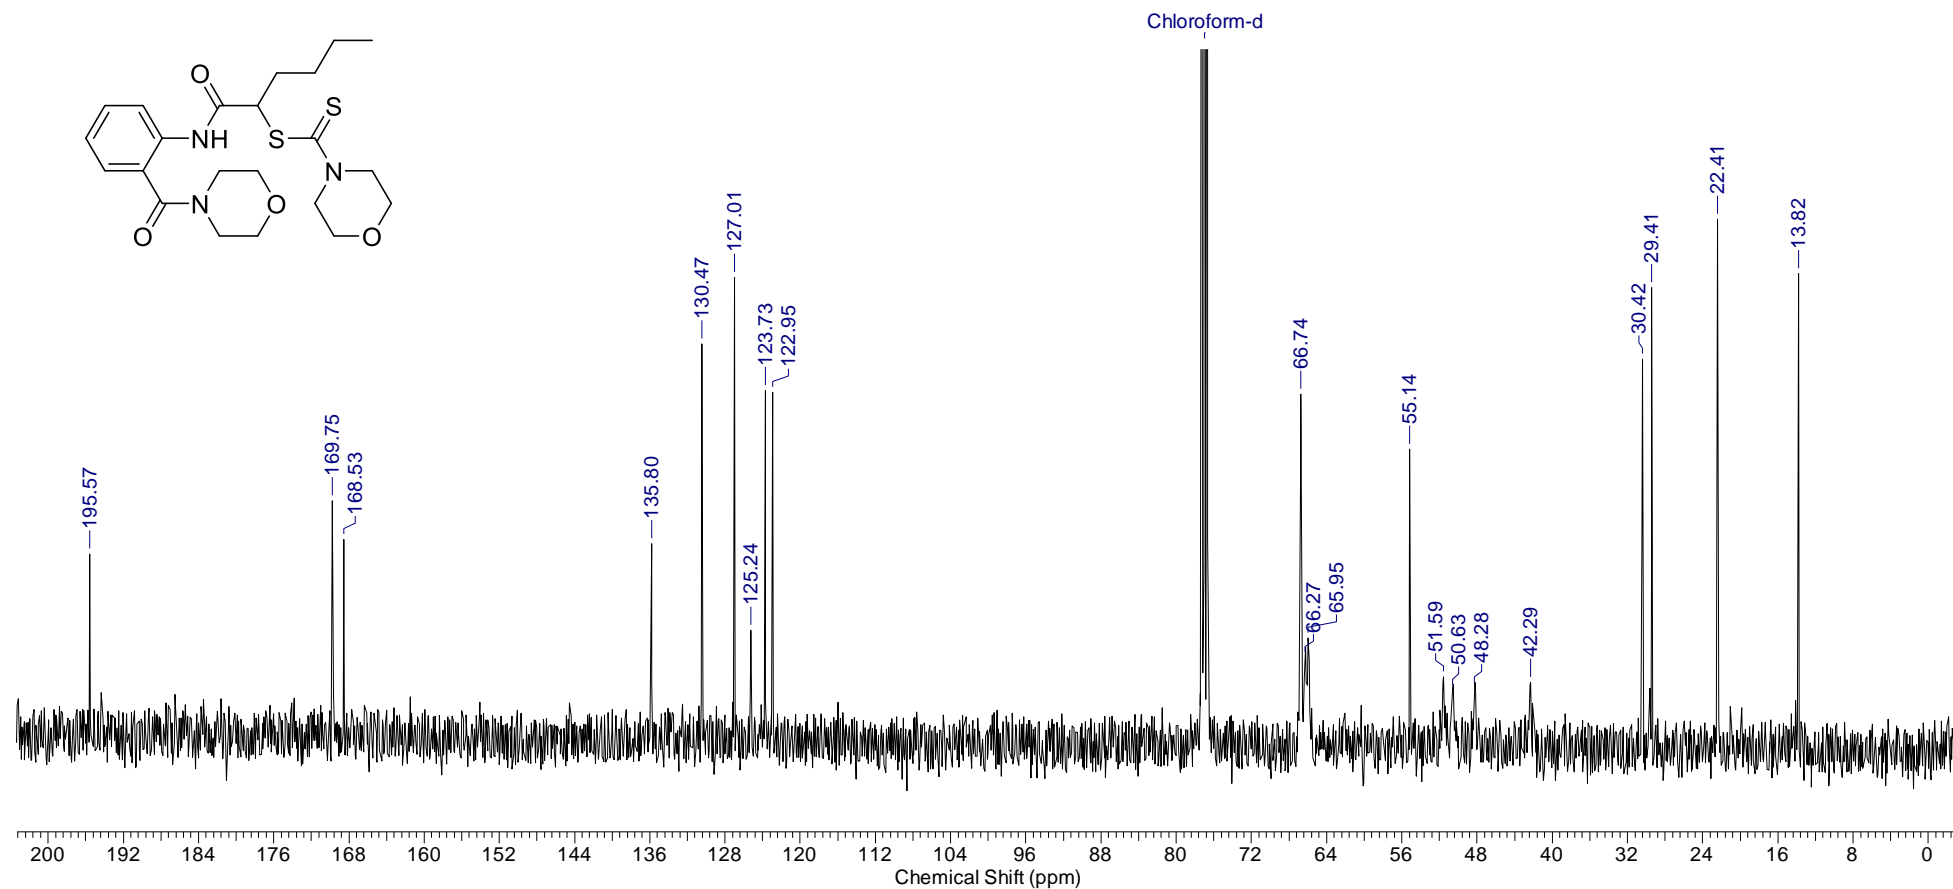

1-([2-(Piperidin-4-ylcarbonyl)phenyl]amino)carbonyl)pentyl piperidine-4-carbodithioate (11b)

$^1\text{H}$  NMR (400 MHz,  $\text{CDCl}_3$ )

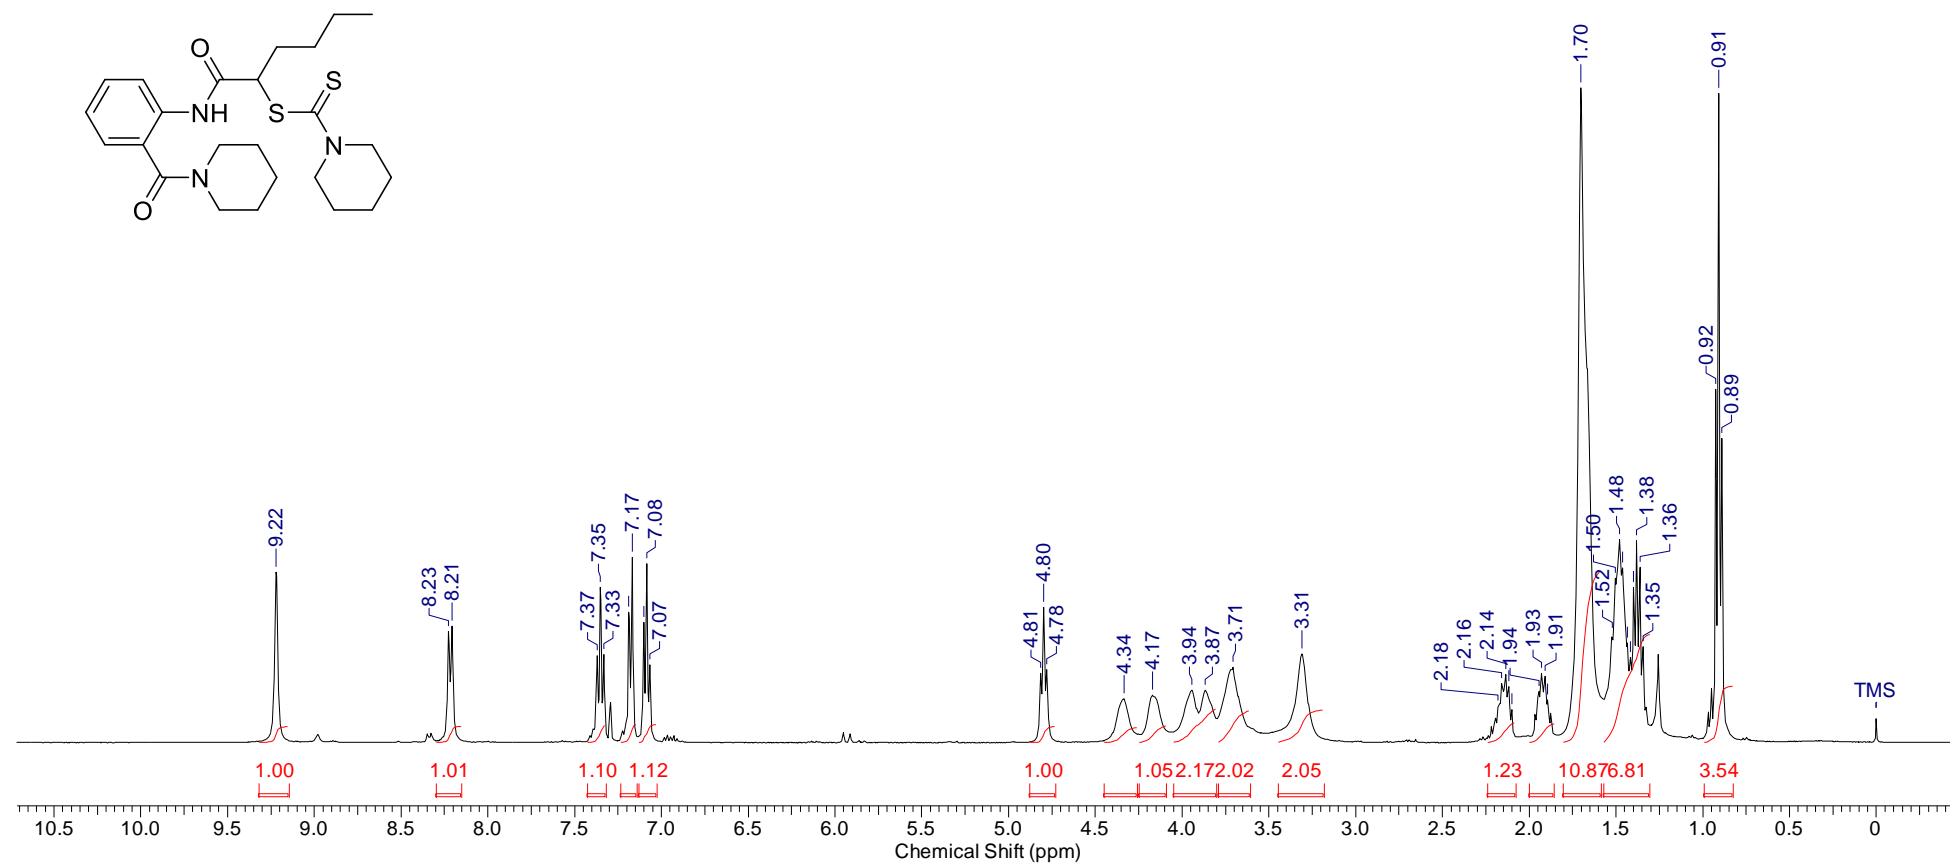

1-([2-(Piperidin-4-ylcarbonyl)phenyl]amino)carbonyl)pentyl piperidine-4-carbodithioate (11b)

$^{13}\text{C}$  NMR (100 MHz,  $\text{CDCl}_3$ )

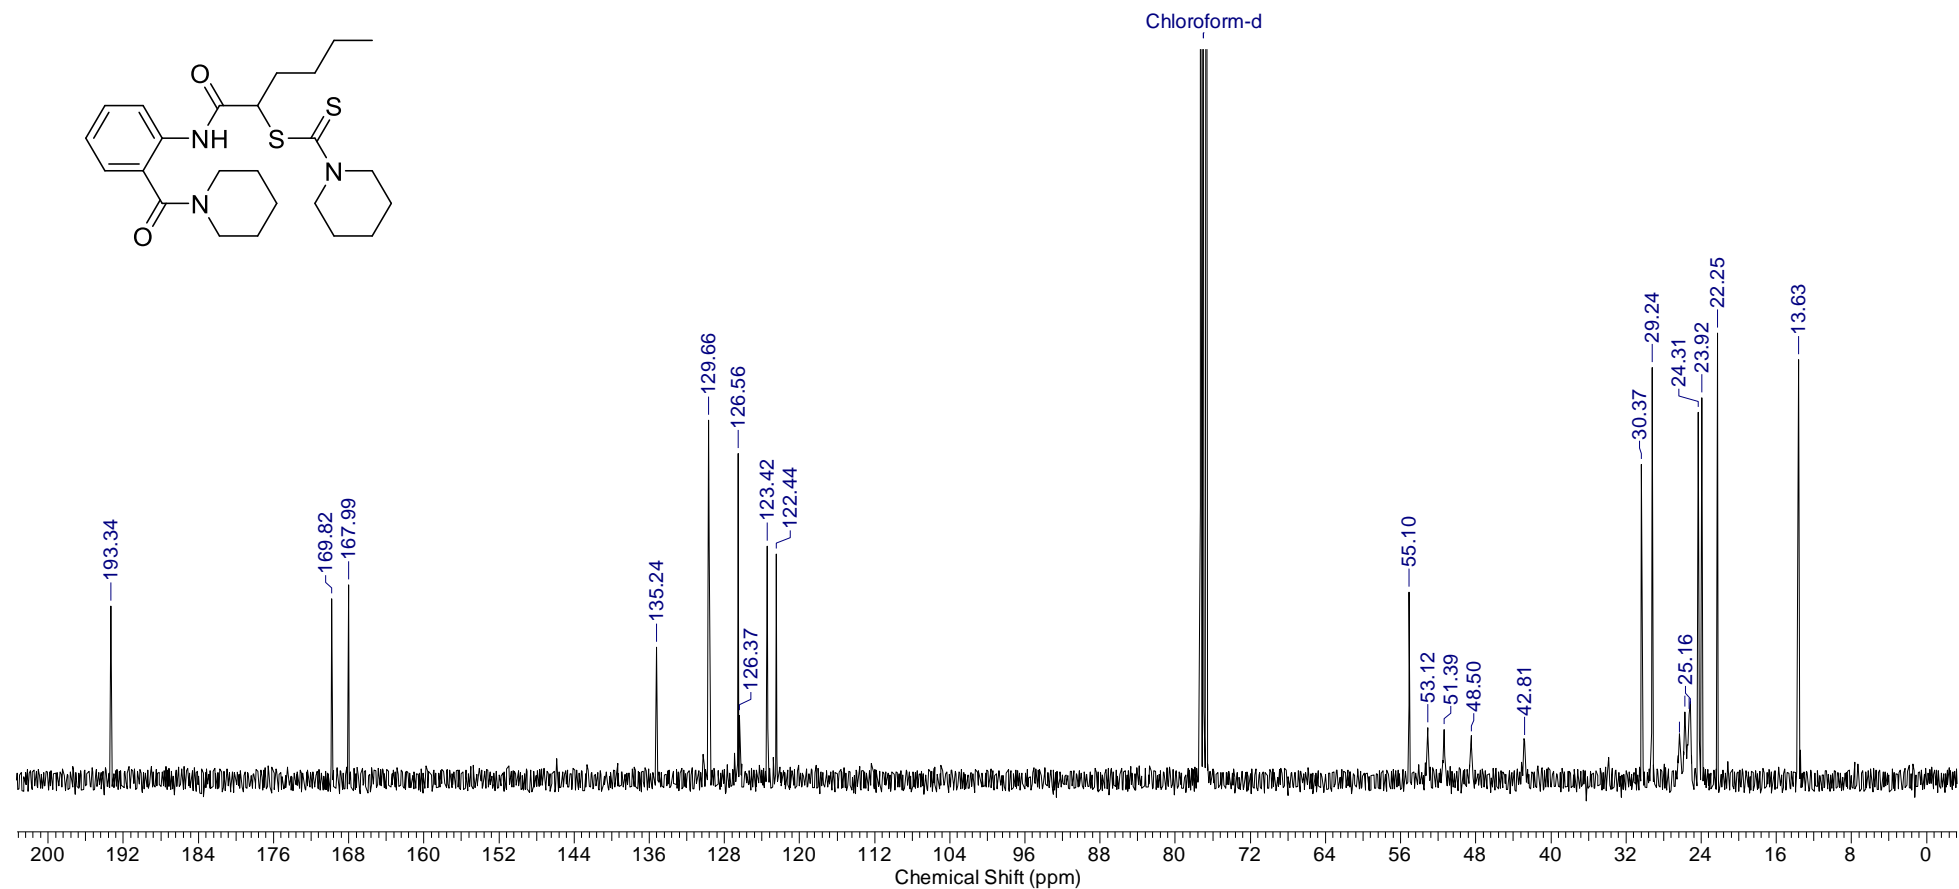

1-([2-(Pyrrolidin-4-ylcarbonyl)phenyl]amino)carbonyl)pentyl pyrrolidine-4-carbodithioate (11c)

<sup>1</sup>H NMR (600 MHz, CDCl<sub>3</sub>)

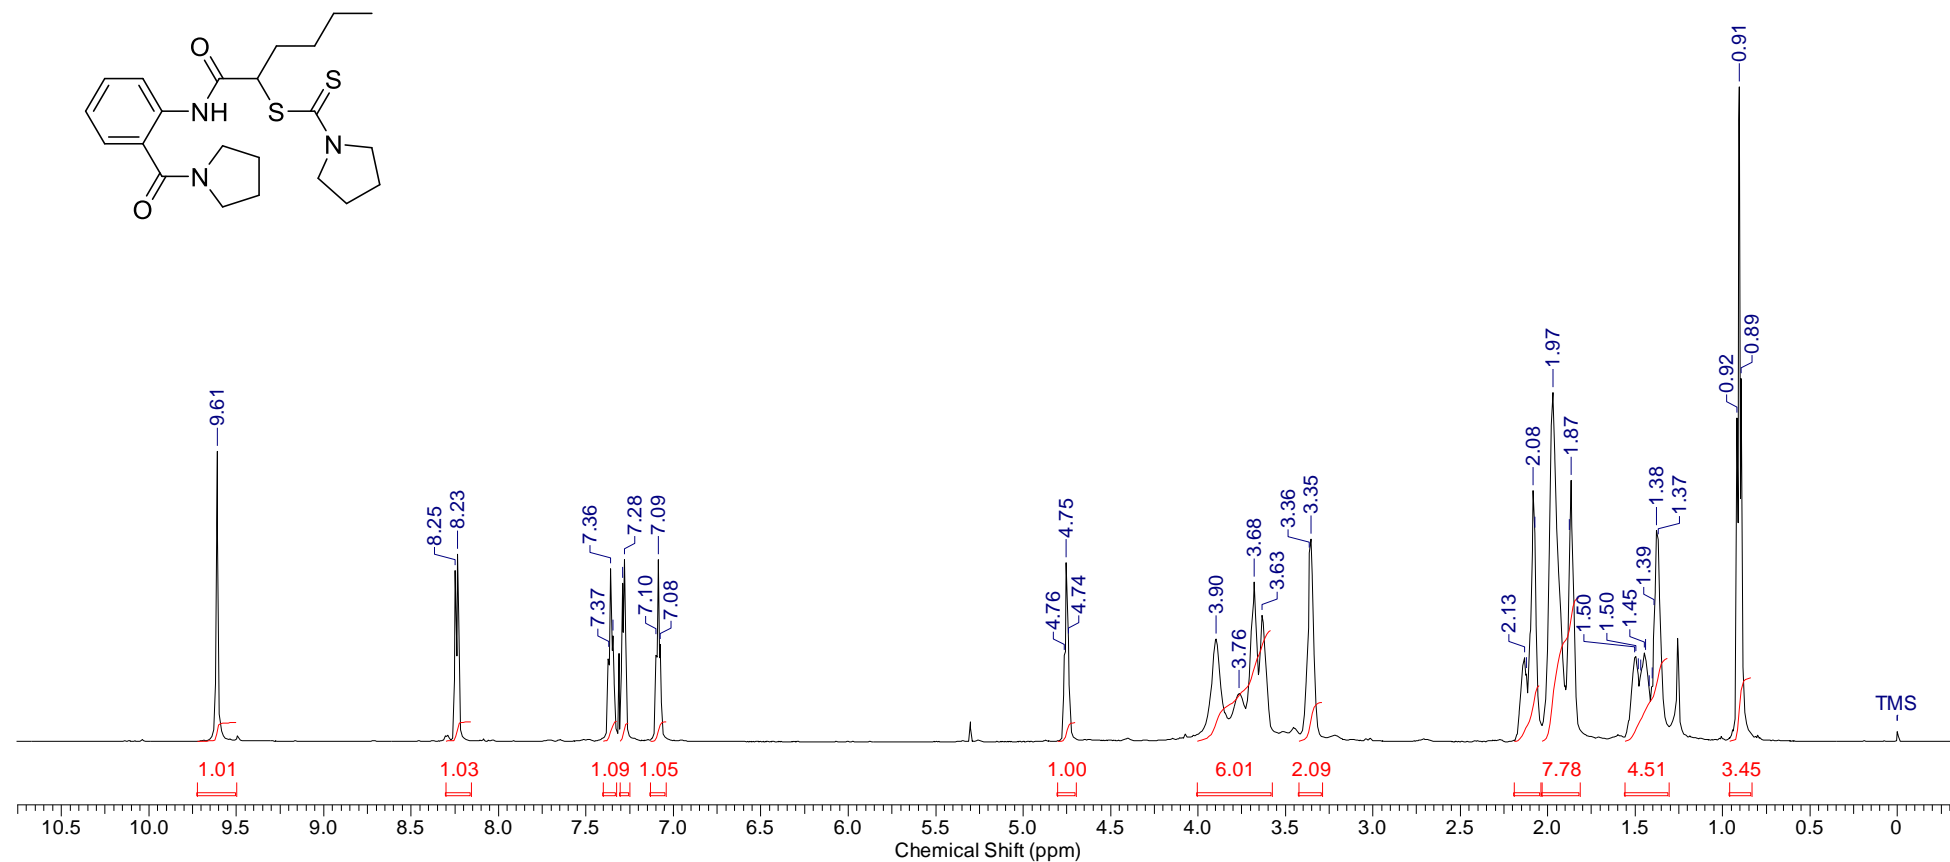

1-([2-(Pyrrolidin-4-ylcarbonyl)phenyl]amino)carbonyl)pentyl pyrrolidine-4-carbodithioate (11c)

$^{13}\text{C}$  NMR (151 MHz,  $\text{CDCl}_3$ )

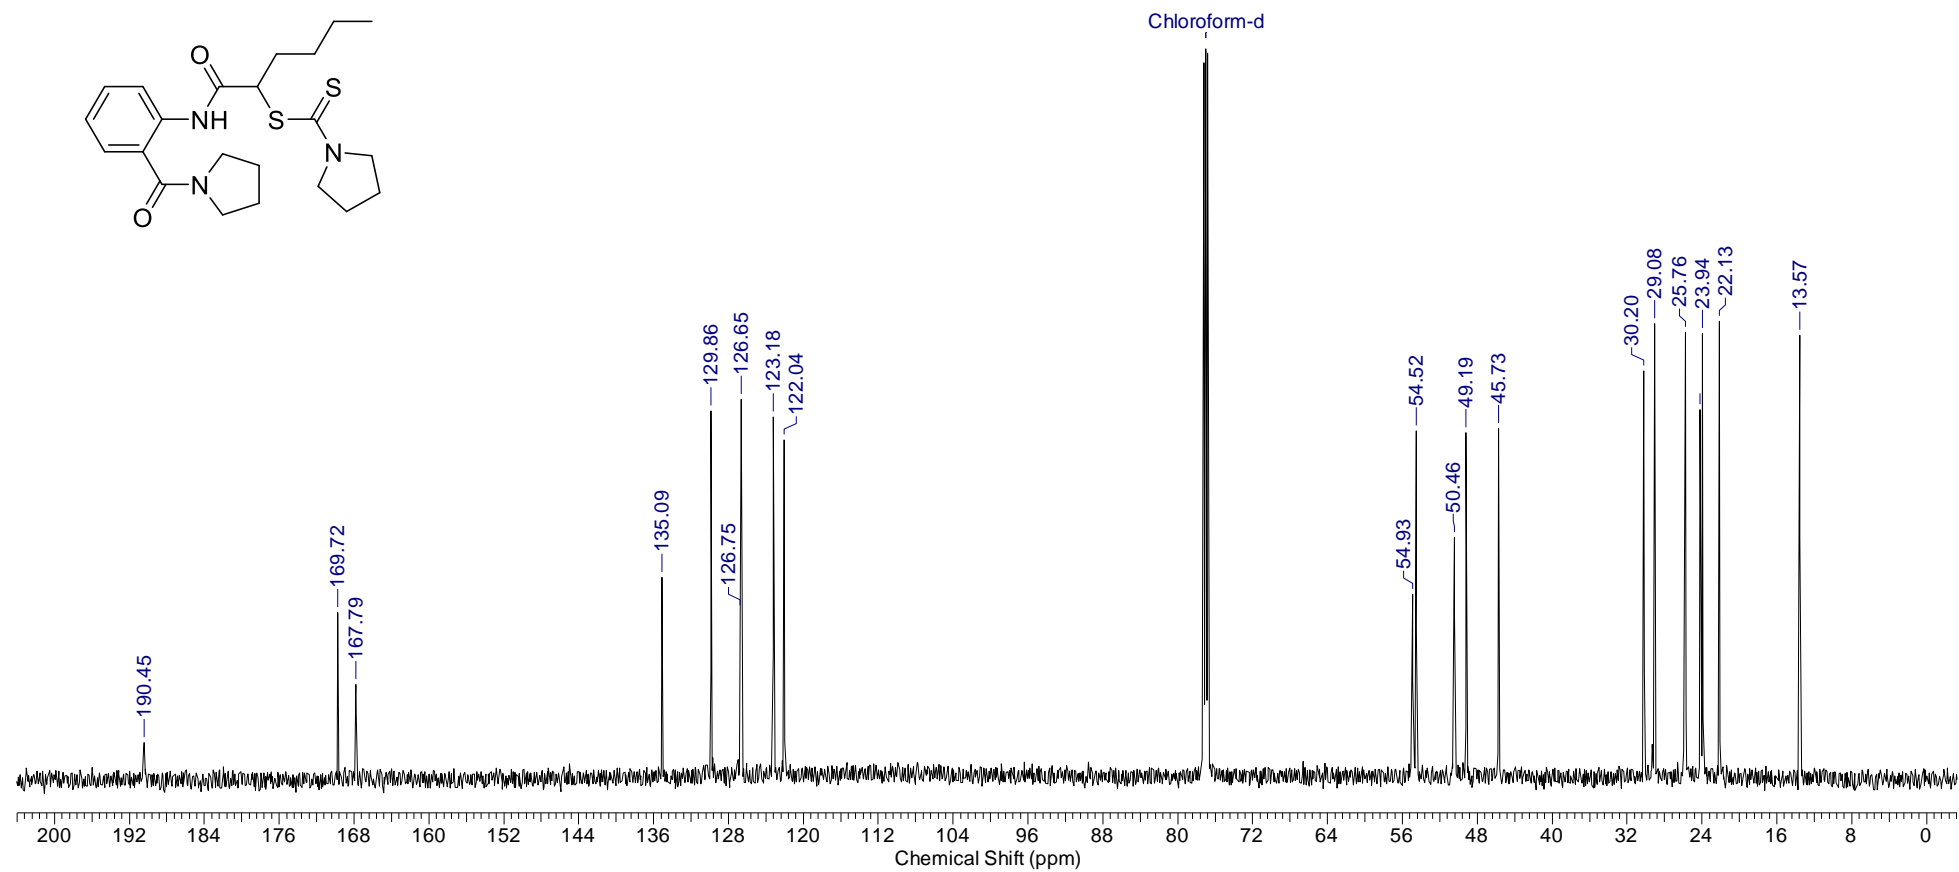

1-([2-(Thiomorpholin-4-ylcarbonyl)phenyl]amino)carbonyl)pentyl thiomorpholine-4-carbodithioate (11d)

<sup>1</sup>H NMR (400 MHz, CDCl<sub>3</sub>)

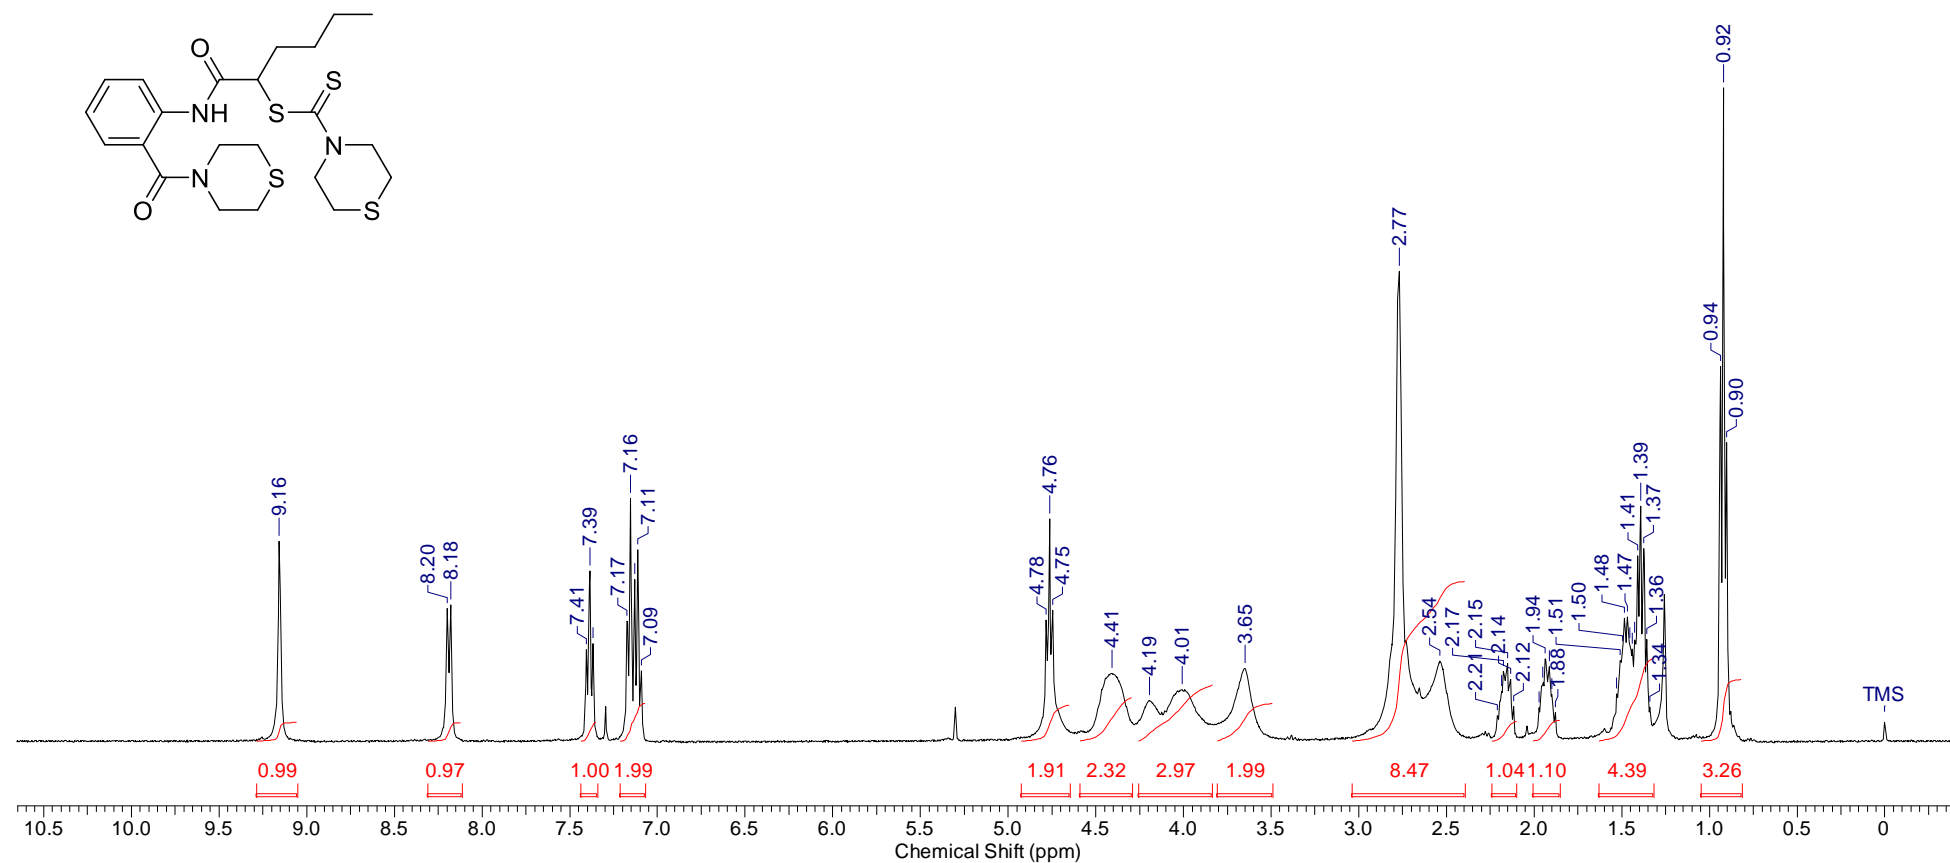

1-([2-(Thiomorpholin-4-ylcarbonyl)phenyl]amino)carbonyl)pentyl thiomorpholine-4-carbodithioate (11d)

$^{13}\text{C}$  NMR (100 MHz,  $\text{CDCl}_3$ )

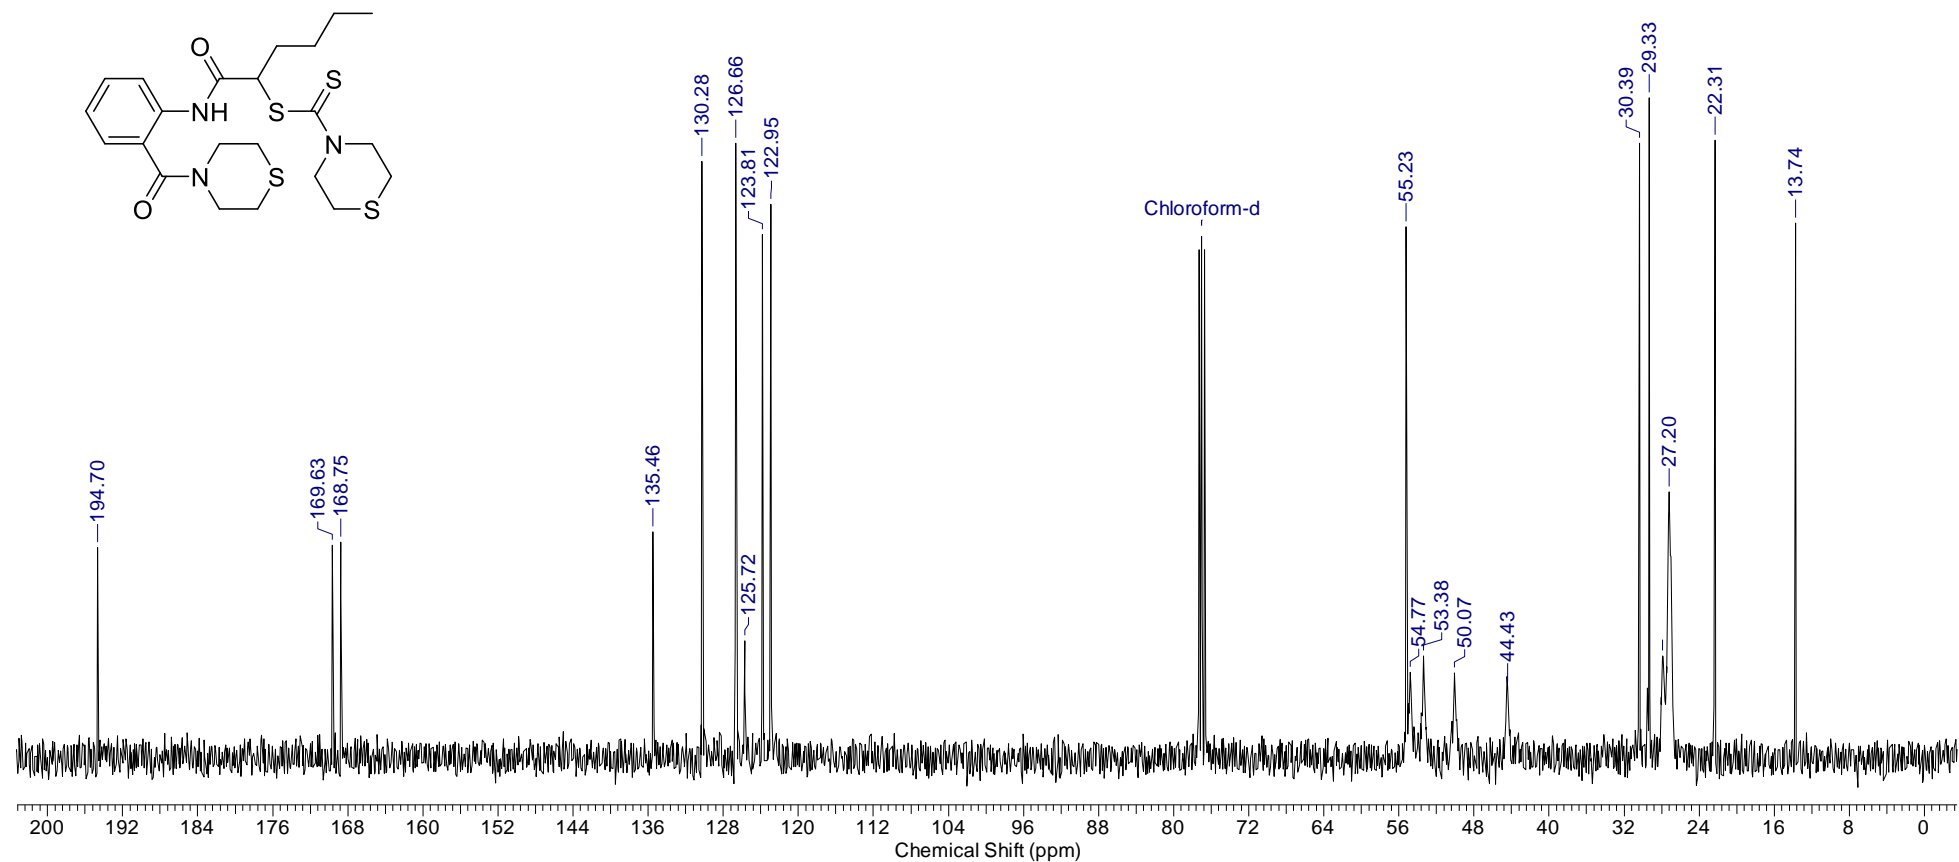



1-([4-Bromo-2-(pyrrolidin-1-ylcarbonyl)phenyl]amino)carbonyl)pentyl pyrrolidine-1-carbodithioate (11e)

$^1\text{H}$  NMR (400 MHz,  $\text{CDCl}_3$ )

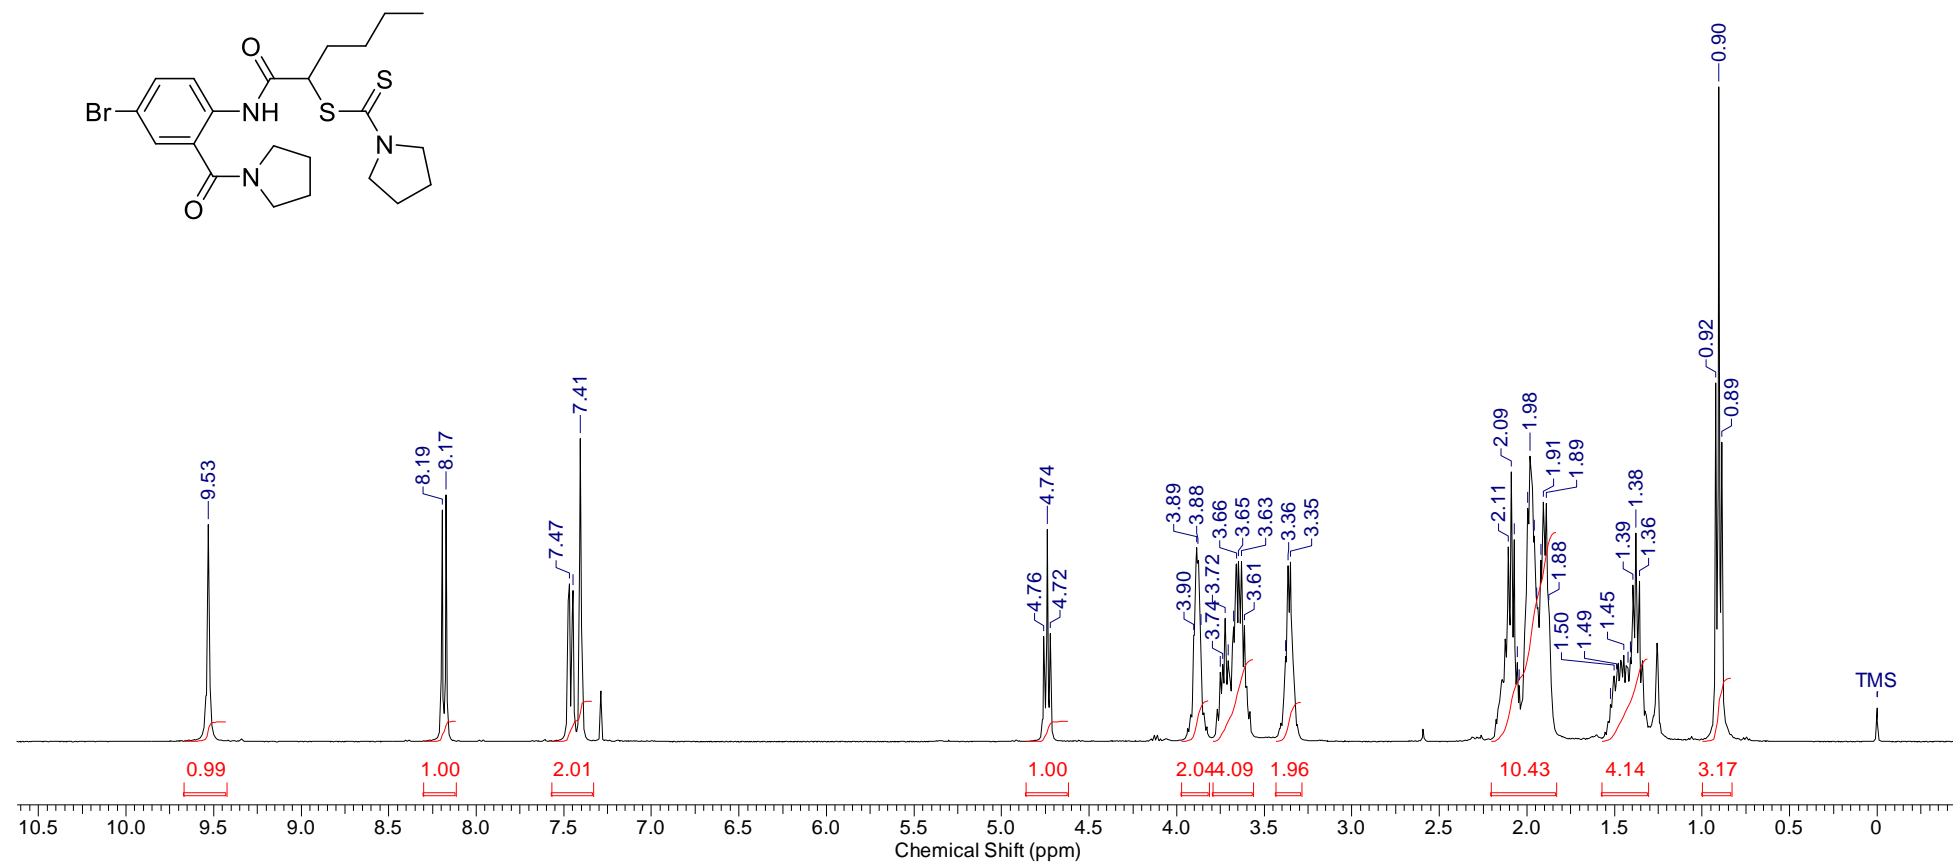

1-([4-Bromo-2-(pyrrolidin-1-ylcarbonyl)phenyl]amino)carbonyl)pentyl pyrrolidine-1-carbodithioate (11e)

$^{13}\text{C}$  NMR (100 MHz,  $\text{CDCl}_3$ )

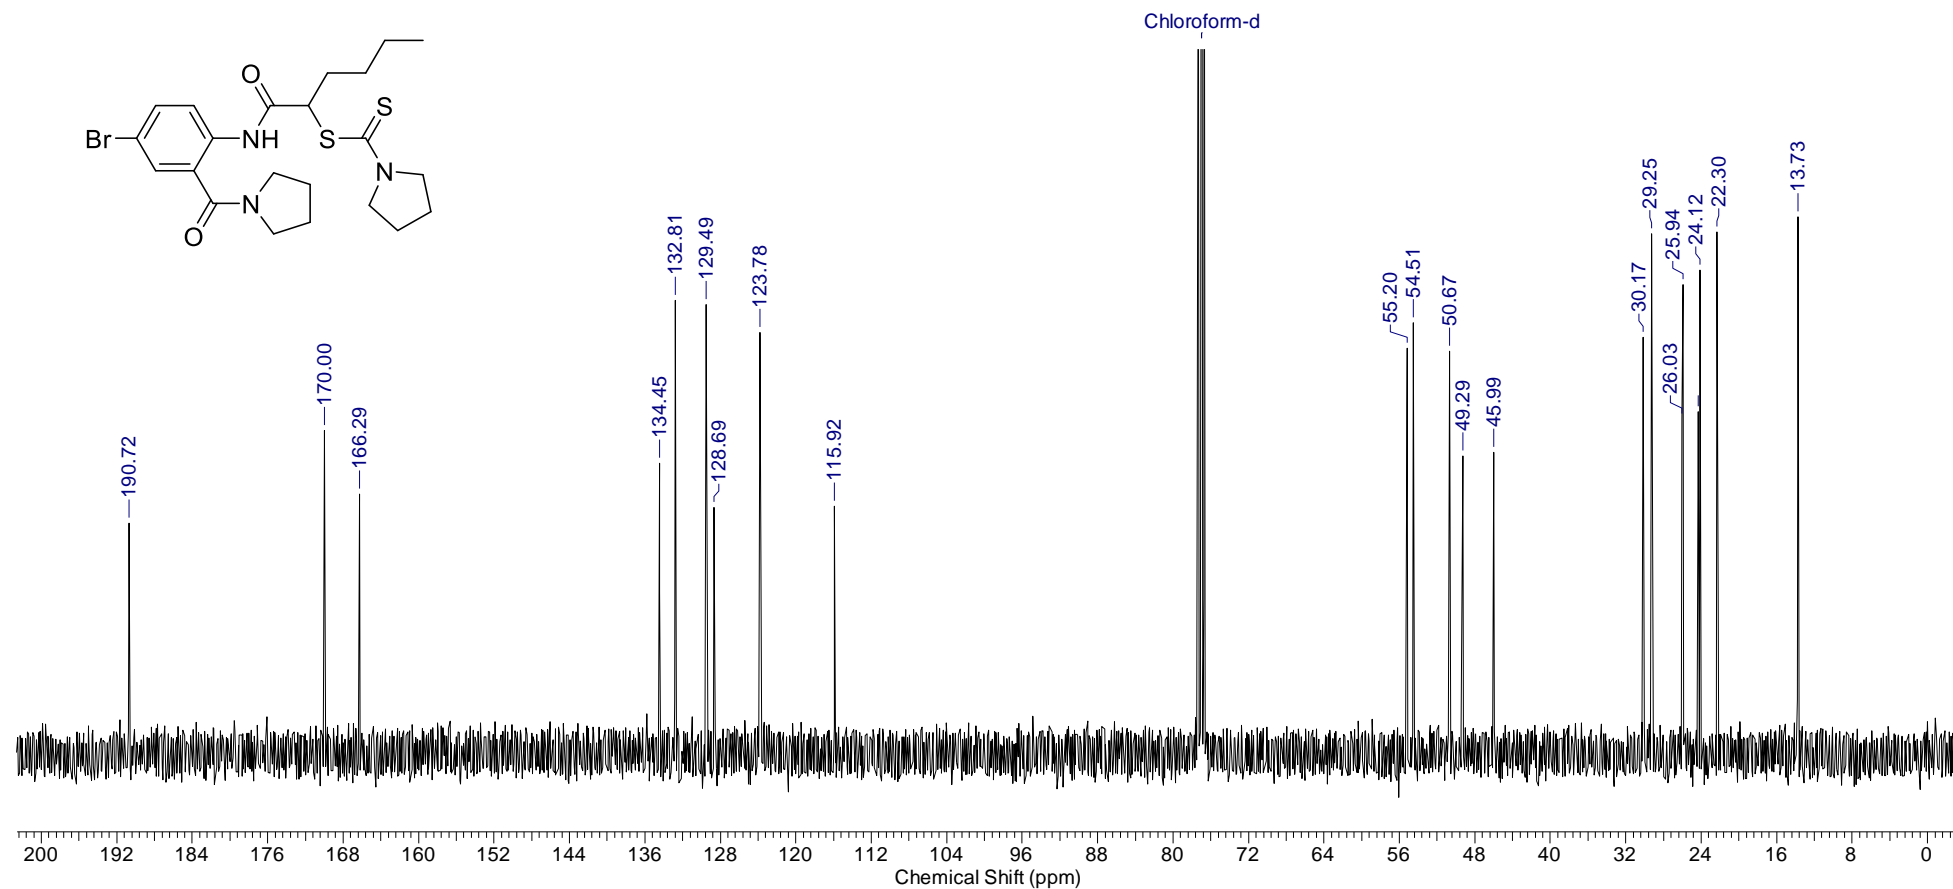

## Analysis of crude reaction mixtures

### 1-(1,3-Benzoxazol-2-yl)pentyl dimethyldithiocarbamate (**3i**)

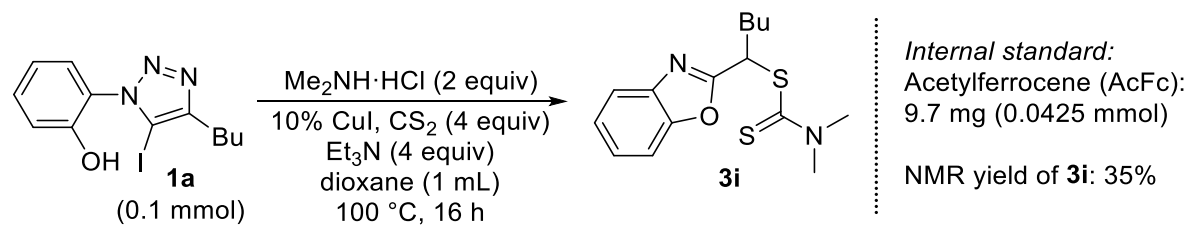

$^1\text{H}$  NMR (400 MHz,  $\text{CDCl}_3$ )

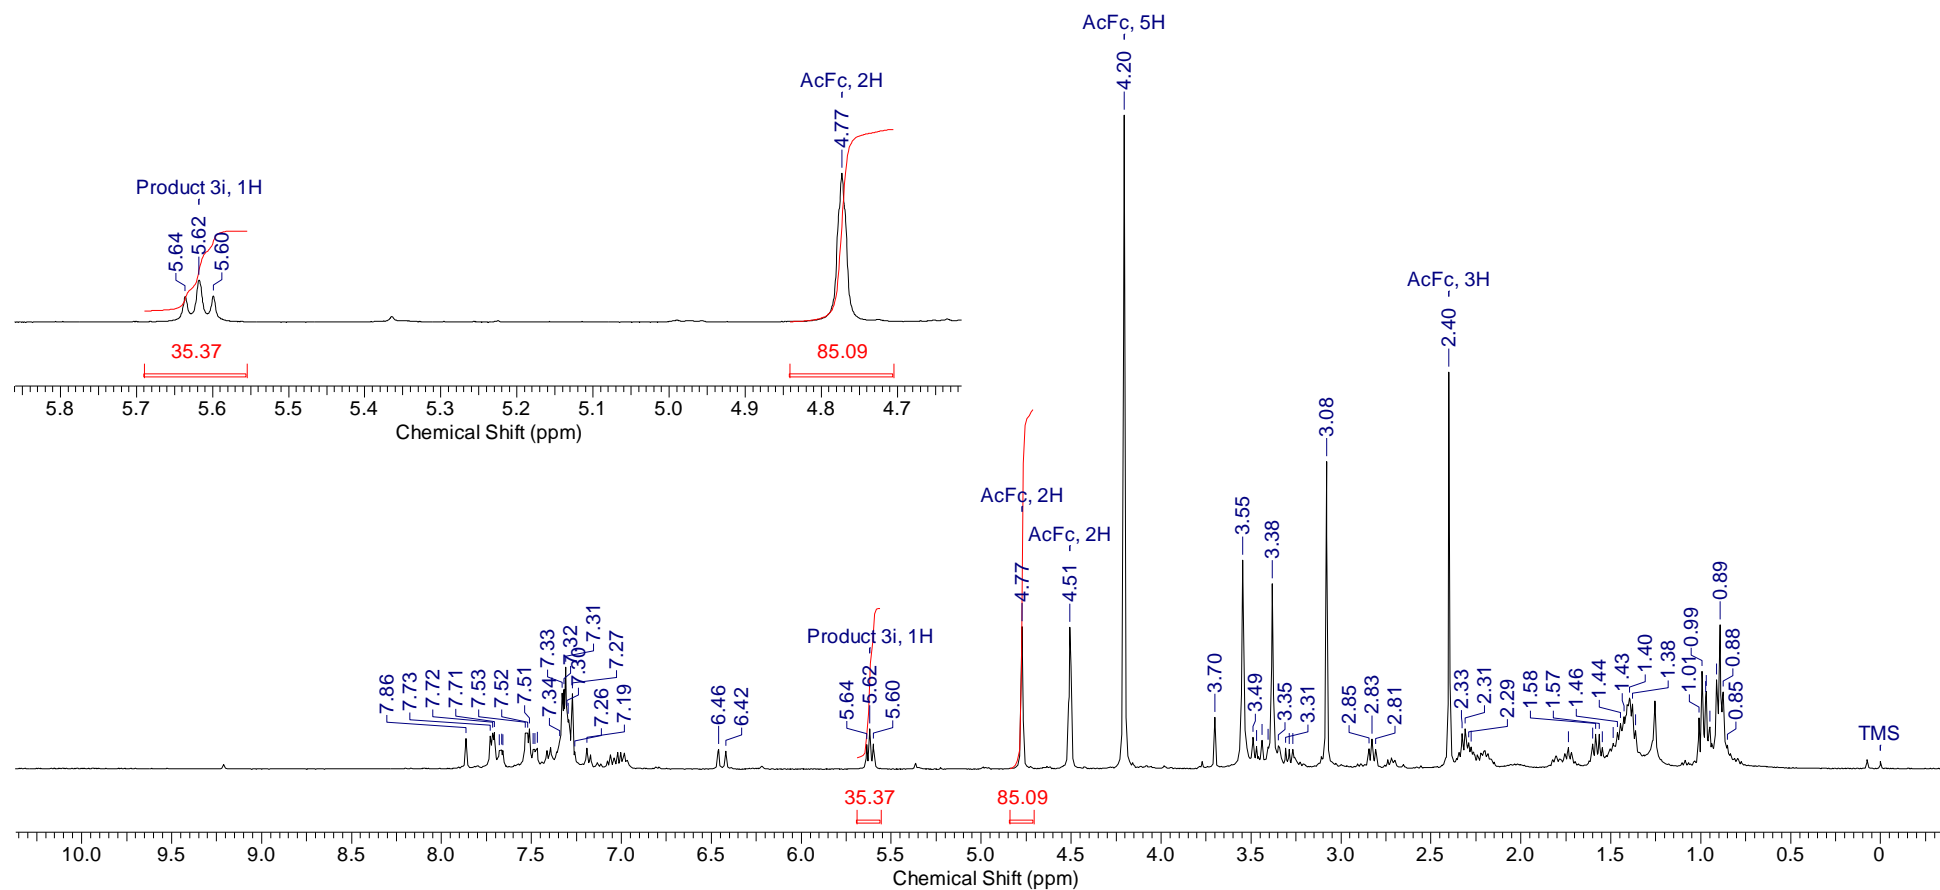

### 1-(1,3-Benzoxazol-2-yl)pentyl benzyl(phenyl)dithiocarbamate (3j)

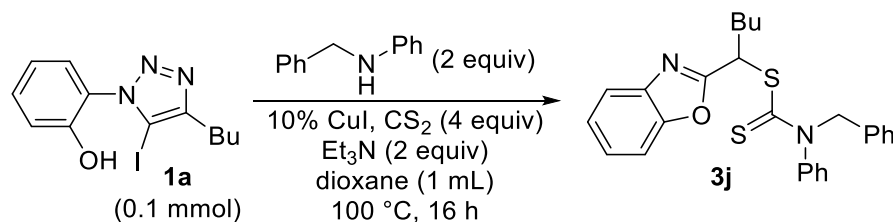

Internal standard:  
Acetylferrocene (AcFc):  
9.2 mg (0.0404 mmol)  
NMR yield of **3j**: 19%

$^1\text{H}$  NMR (400 MHz,  $\text{CDCl}_3$ )

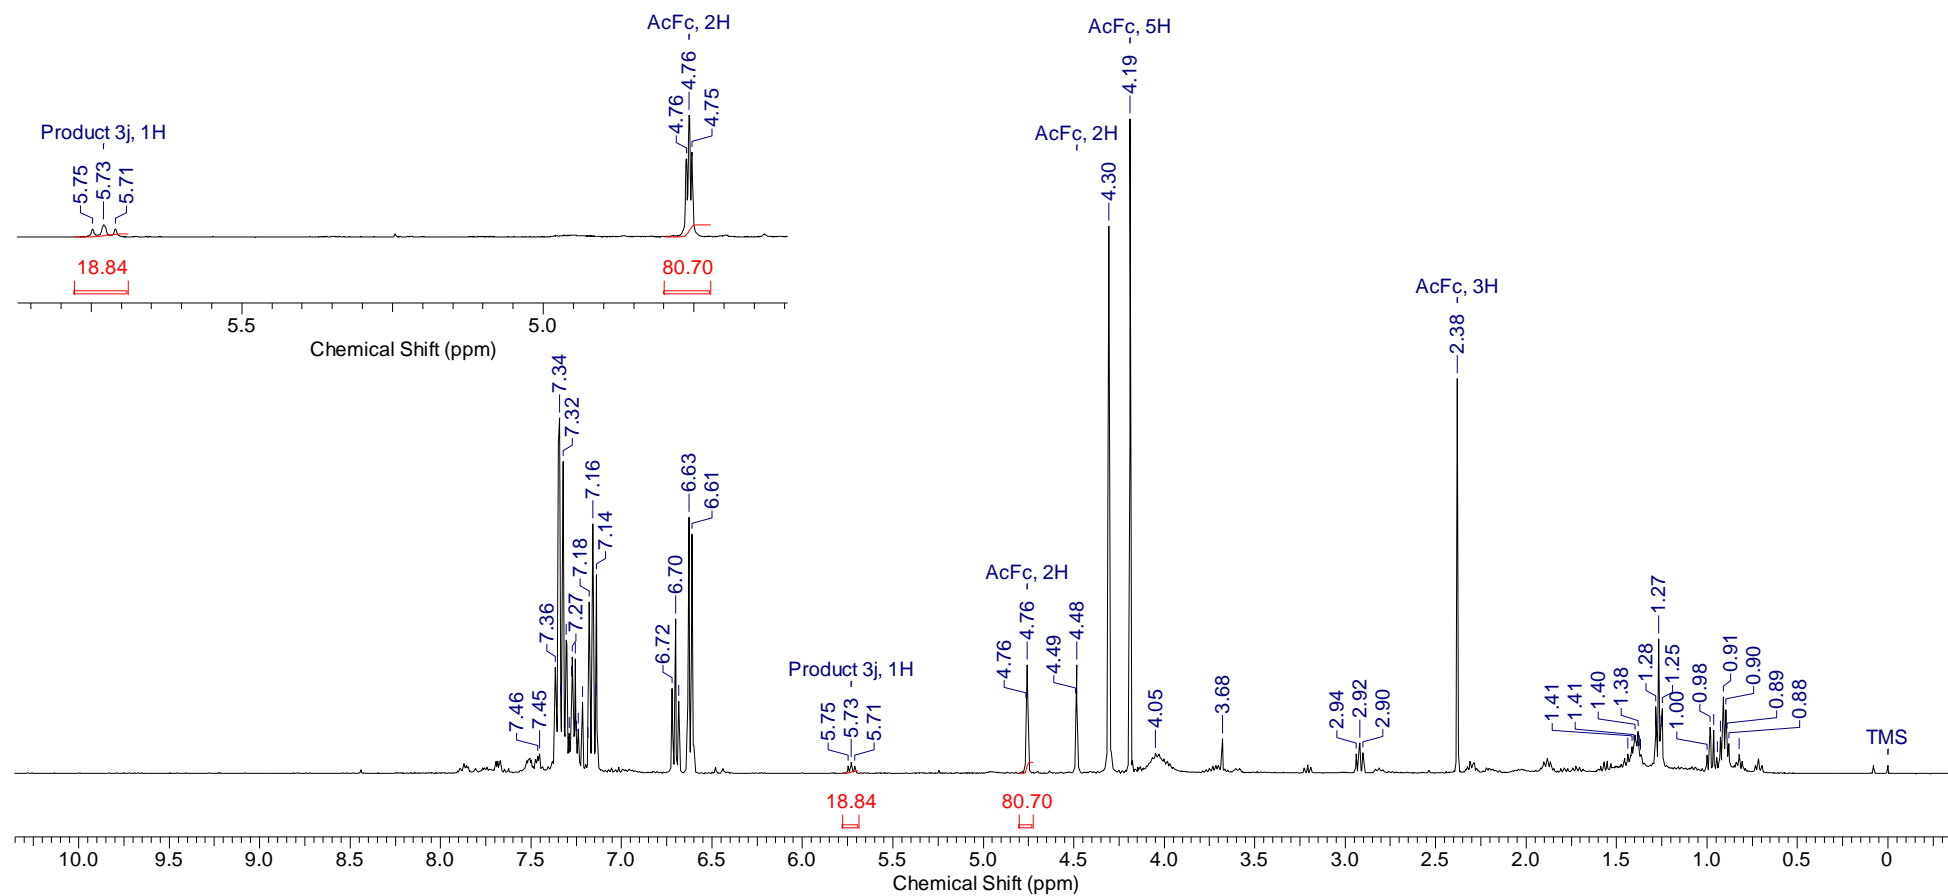

### 1-(6-Nitro-1,3-benzoxazol-2-yl)pentyl morpholine-4-carbodithioate (3p)

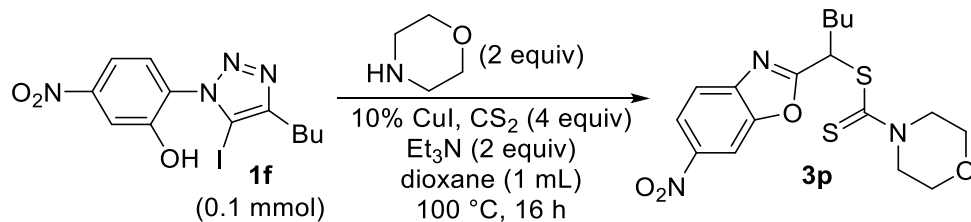

Internal standard:  
Methyl 3,5-dinitrobenzoate (DNB):  
8.5 mg (0.0376 mmol)

NMR yield of **3p**: 28%

<sup>1</sup>H NMR (400 MHz, CDCl<sub>3</sub>)

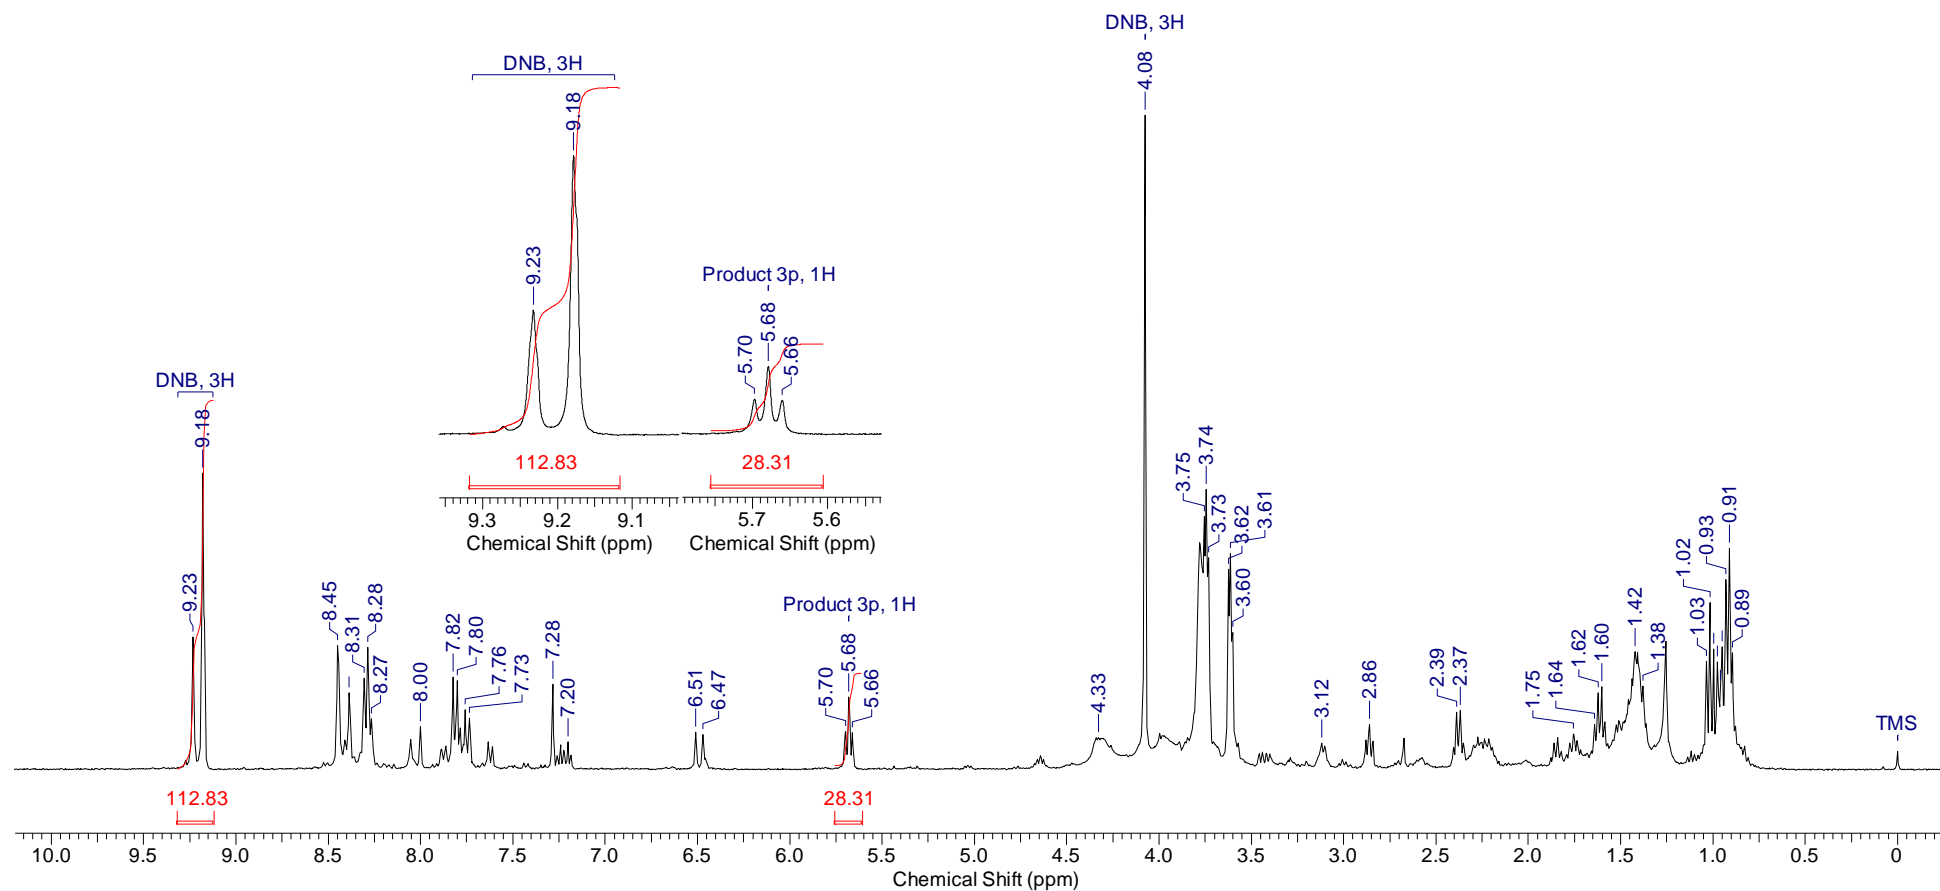

2-[(*E*)-2-Morpholin-4-ylvinyl]-1,3-benzoxazole (**5**)

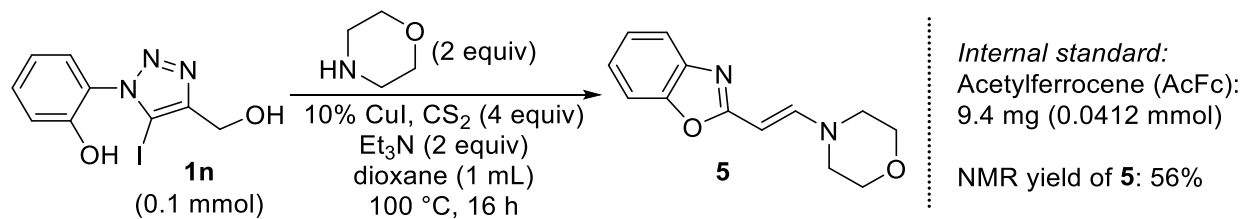

<sup>1</sup>H NMR (400 MHz, CDCl<sub>3</sub>)

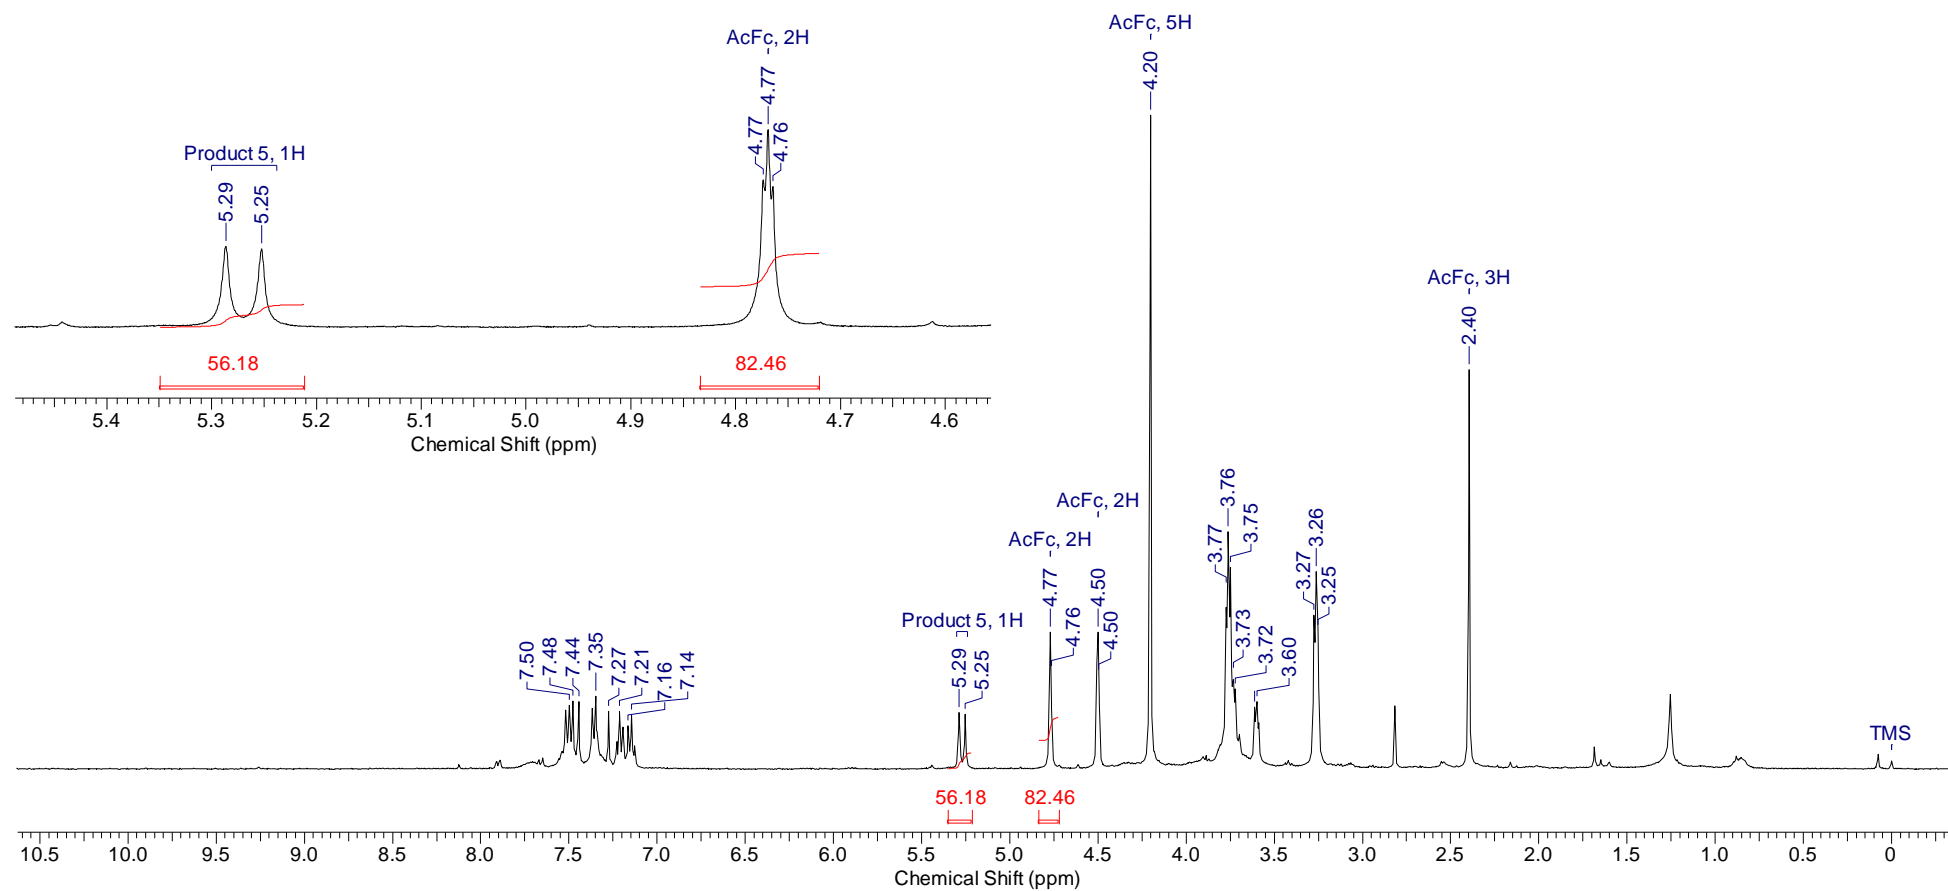

**2-Oxo-1-phenyl-2-[[2-(pyrrolidin-1-ylcarbonyl)phenyl]amino]ethyl pyrrolidine-1-carbodithioate (11f)**

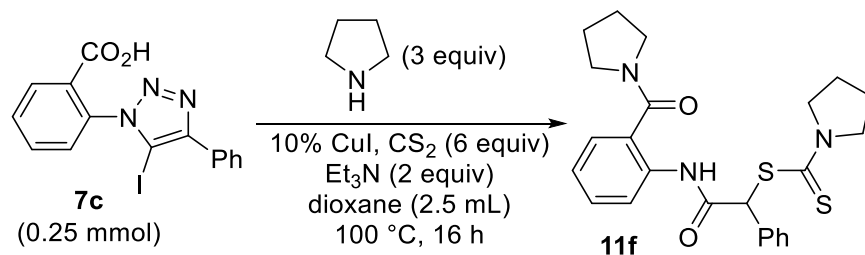

Internal standard:  
Methyl 3,5-dinitrobenzoate (DNB):  
8.9 mg (0.0394 mmol)

NMR yield of **11f**: 24%

<sup>1</sup>H NMR (400 MHz, CDCl<sub>3</sub>)

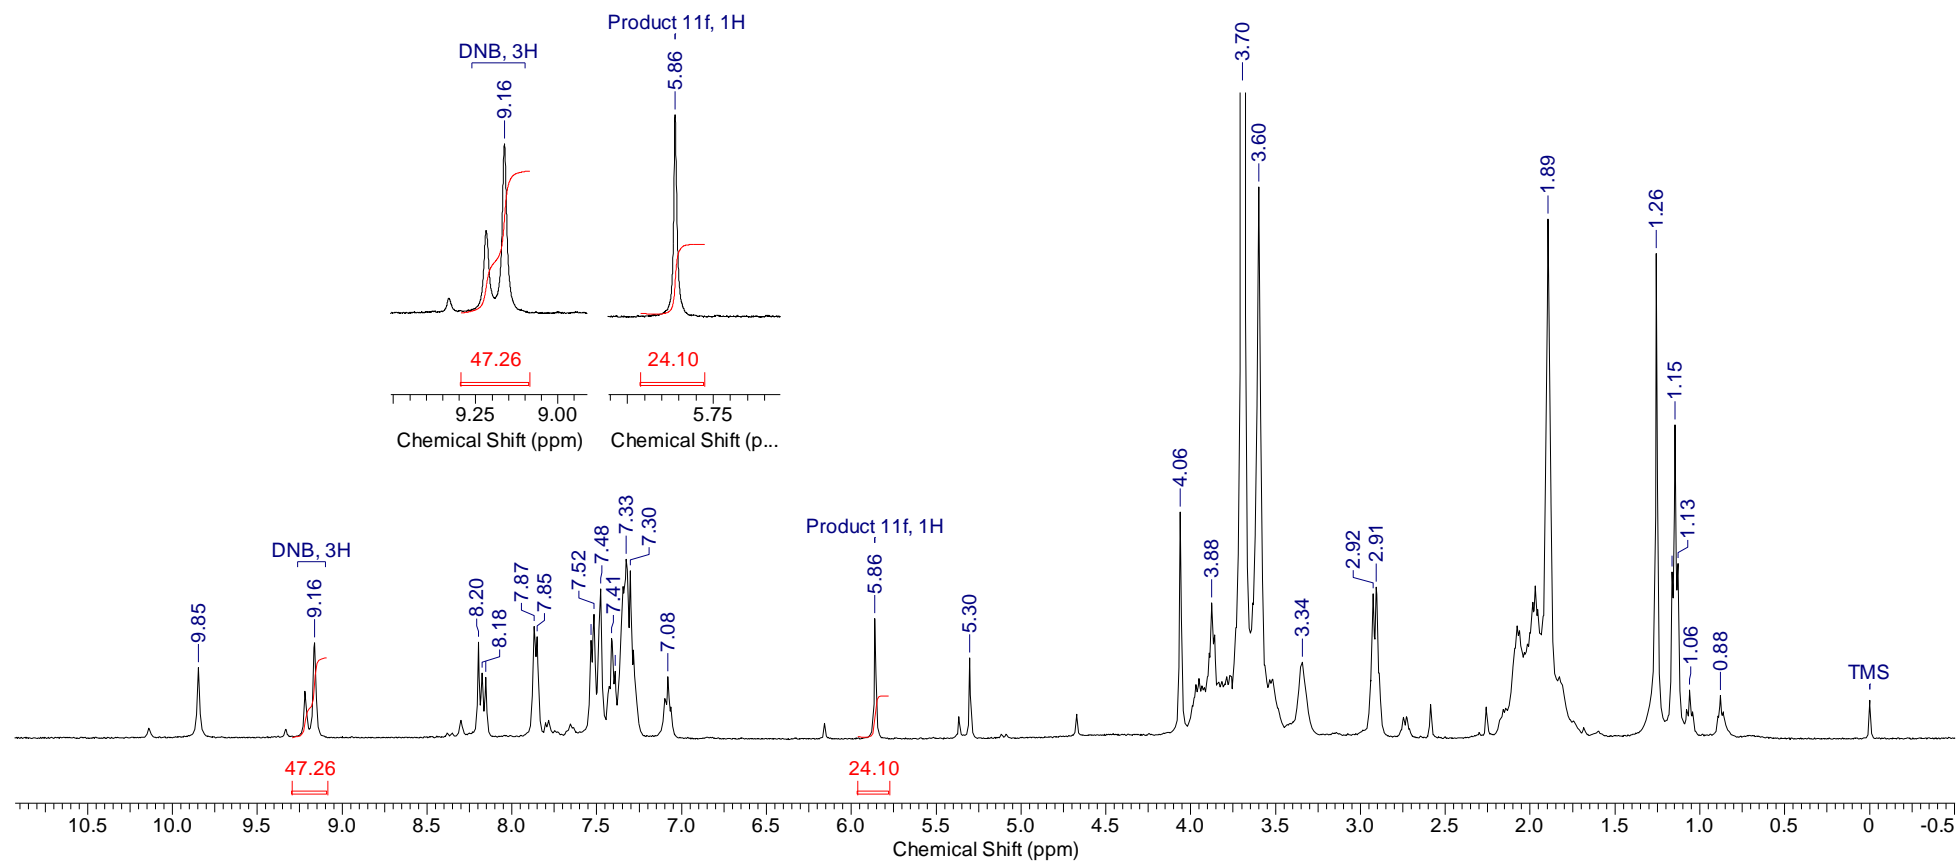

## 2D NMR of 3d and 11c

Assigned signals and  $^1\text{H}$ - $^{13}\text{C}$  HMBC correlations in **3d** and **11c**

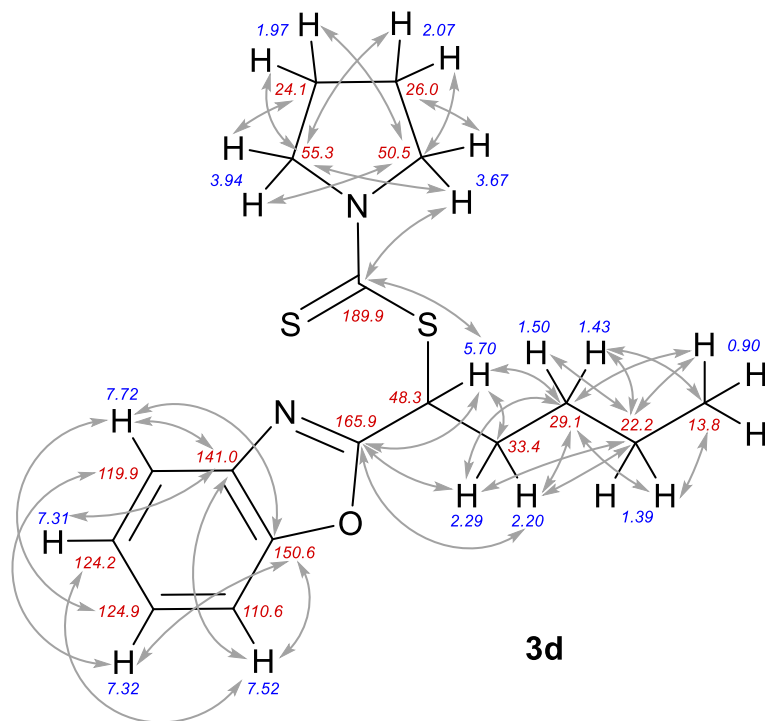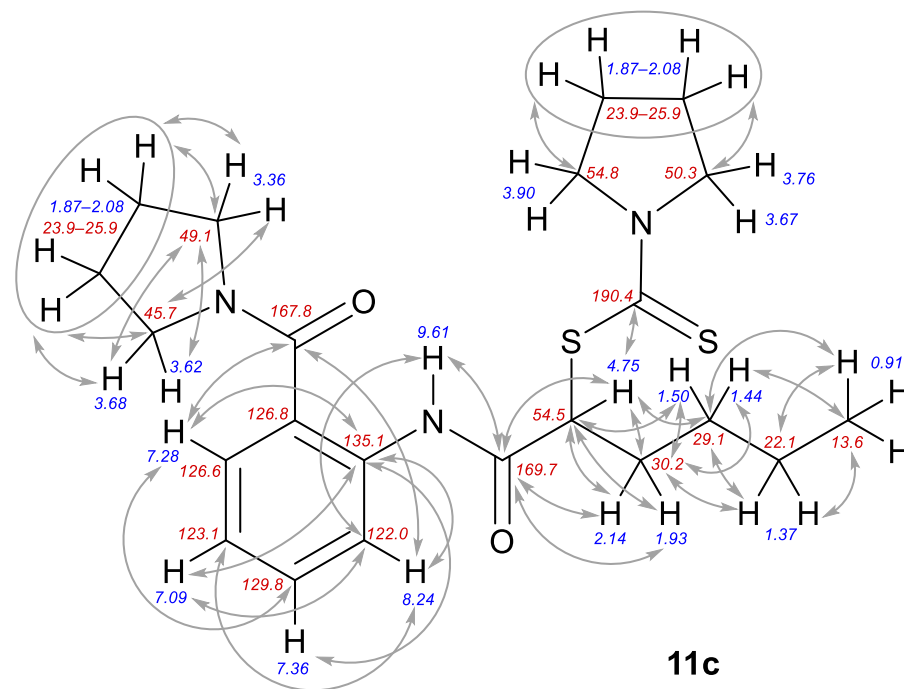



1-(1,3-Benzoxazol-2-yl)pentyl pyrrolidine-4-carbodithioate (3d)  $^1\text{H}$ - $^1\text{H}$  COSY

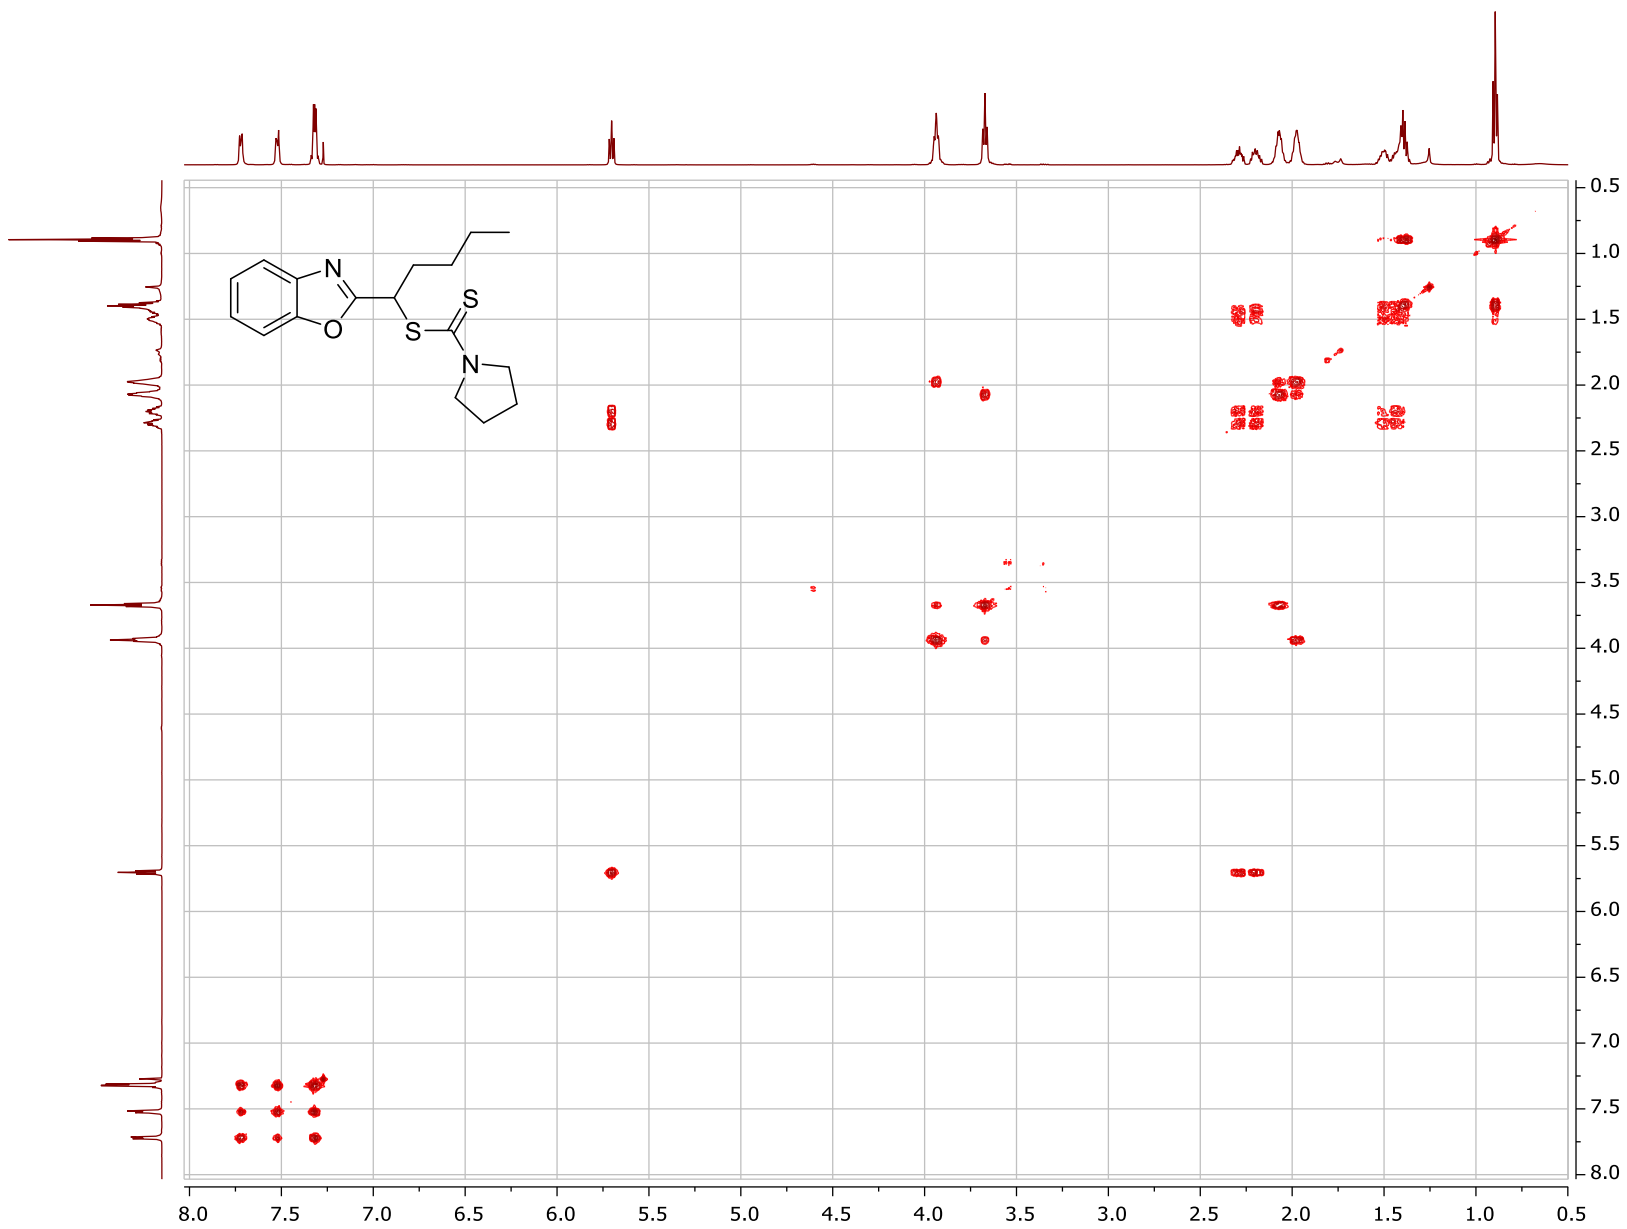

S73

1-(1,3-Benzoxazol-2-yl)pentyl pyrrolidine-4-carbodithioate (3d)  $^1\text{H}$ - $^{13}\text{C}$  HSQC

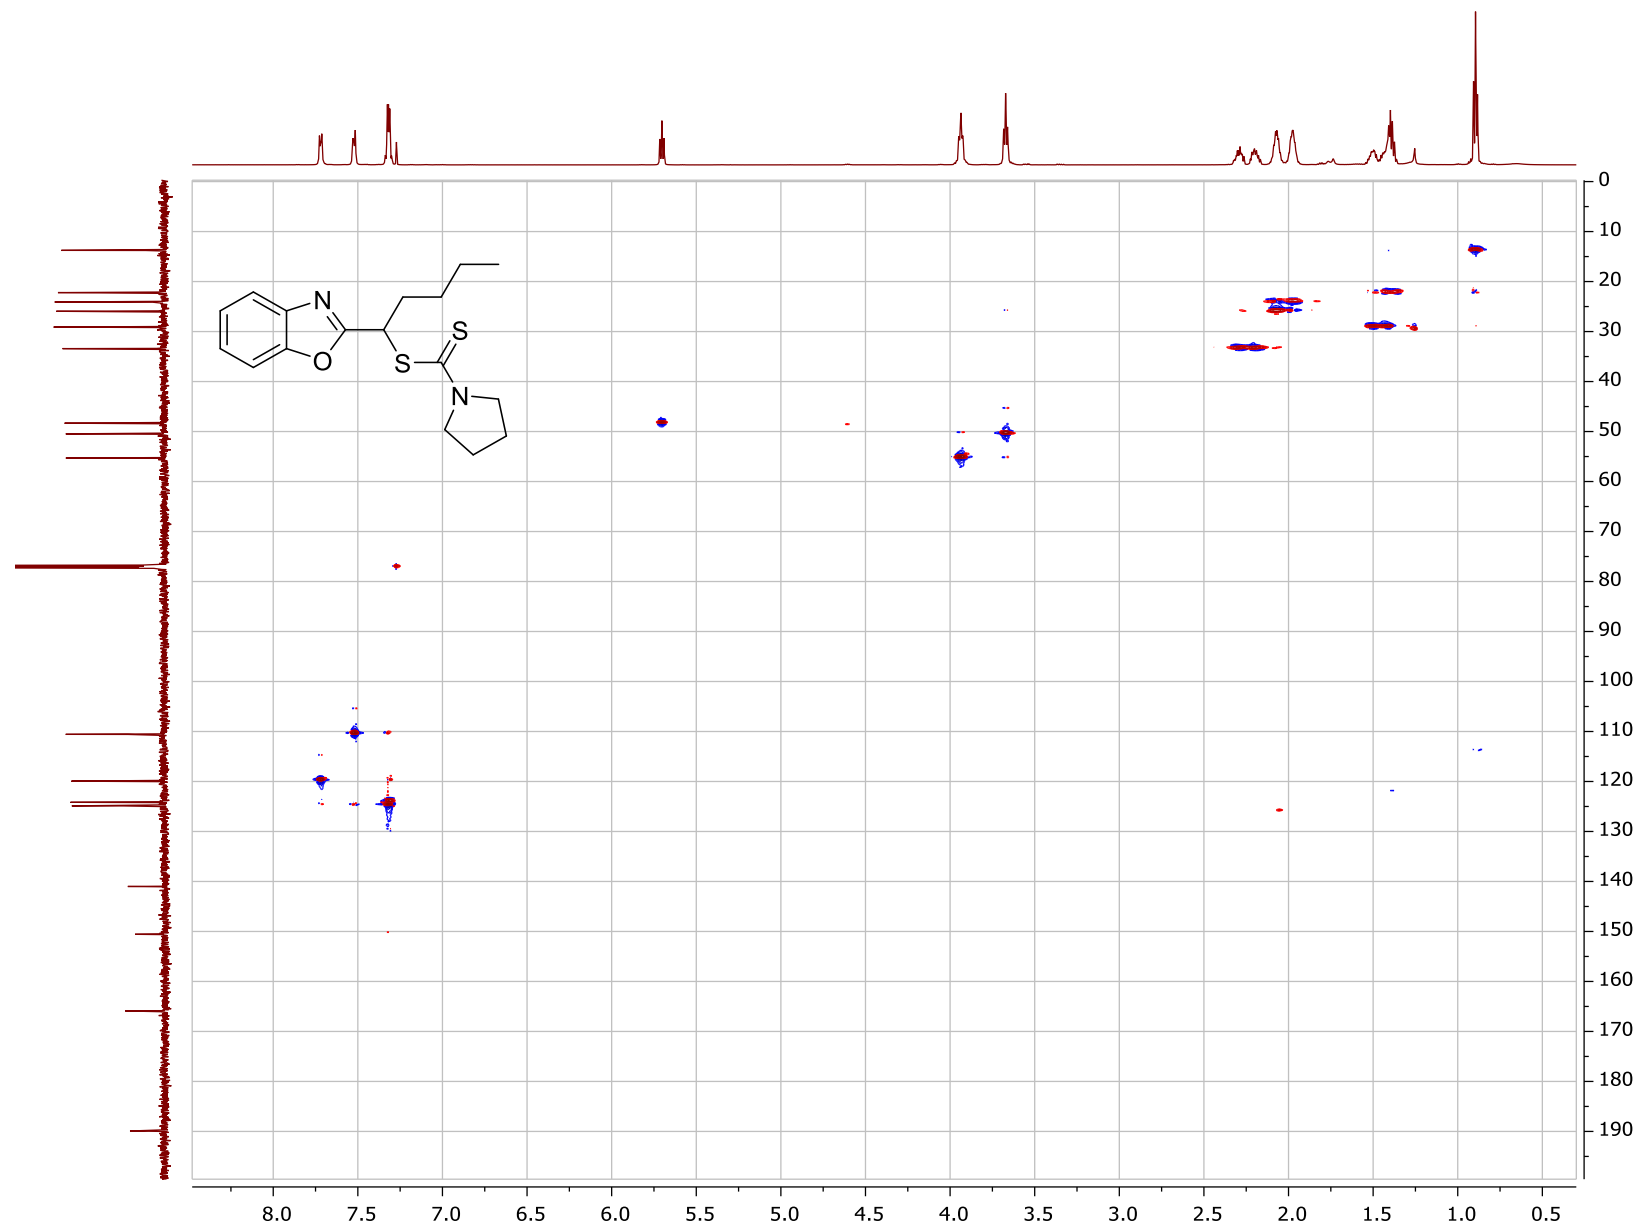

1-(1,3-Benzoxazol-2-yl)pentyl pyrrolidine-4-carbodithioate (3d)  $^1\text{H}$ - $^{13}\text{C}$  HSQC

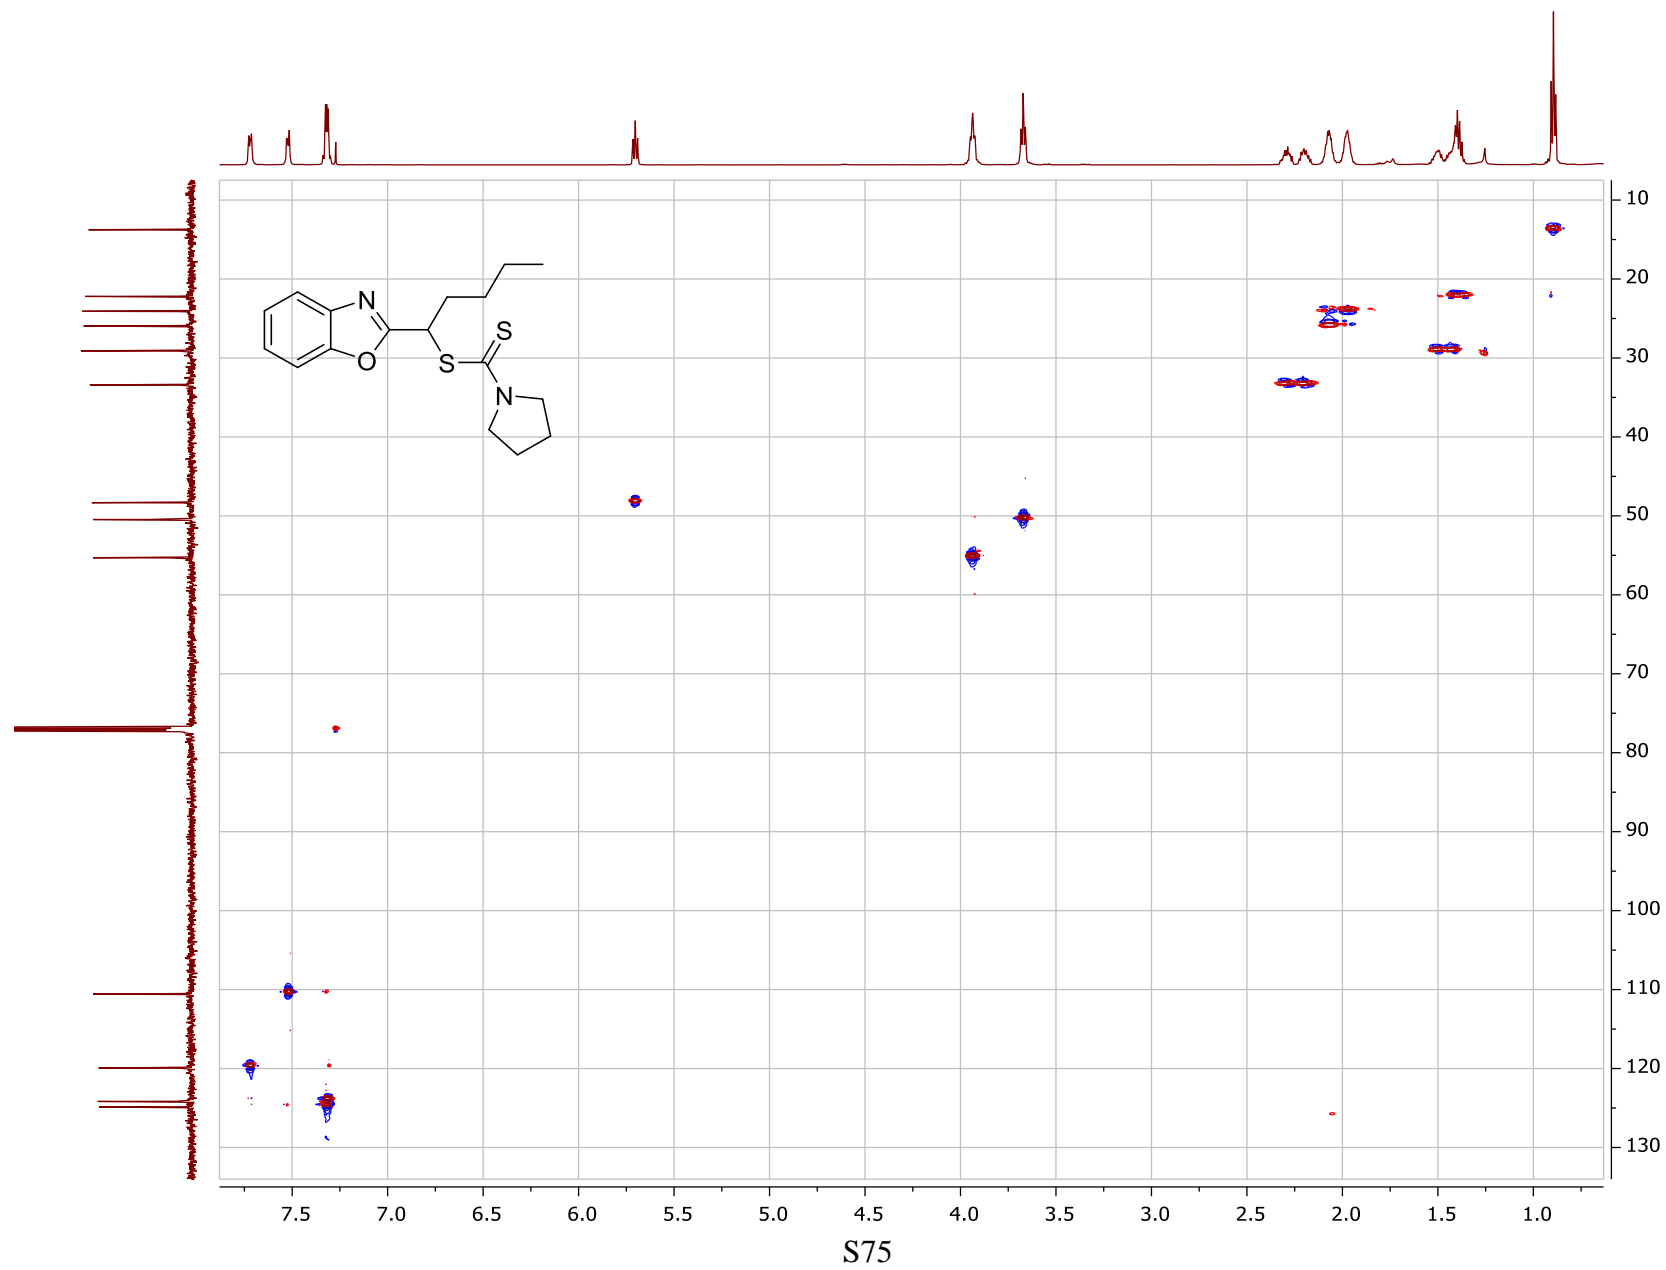

1-(1,3-Benzoxazol-2-yl)pentyl pyrrolidine-4-carbodithioate (3d)  $^1\text{H}$ - $^{13}\text{C}$  HMBC

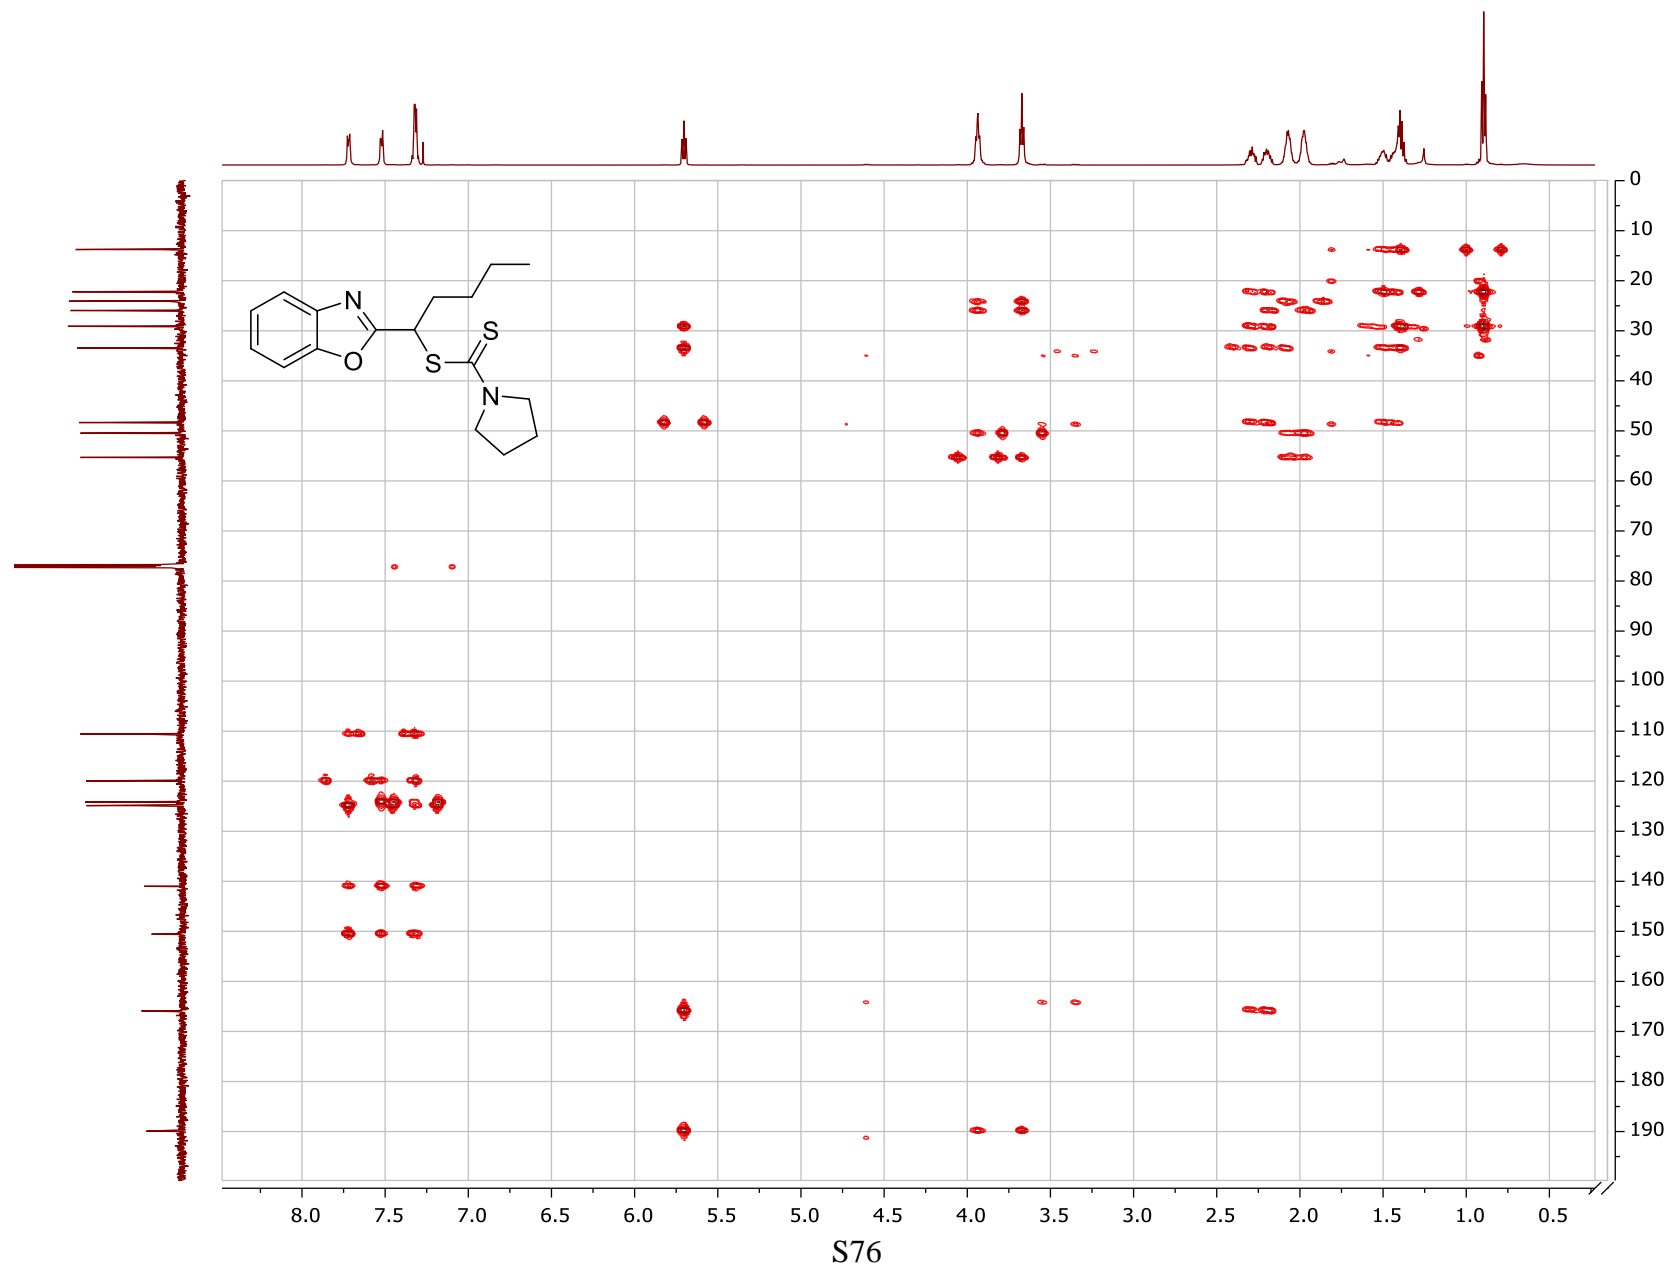

1-(1,3-Benzoxazol-2-yl)pentyl pyrrolidine-4-carbodithioate (3d)  $^1\text{H}$ - $^{13}\text{C}$  HMBC

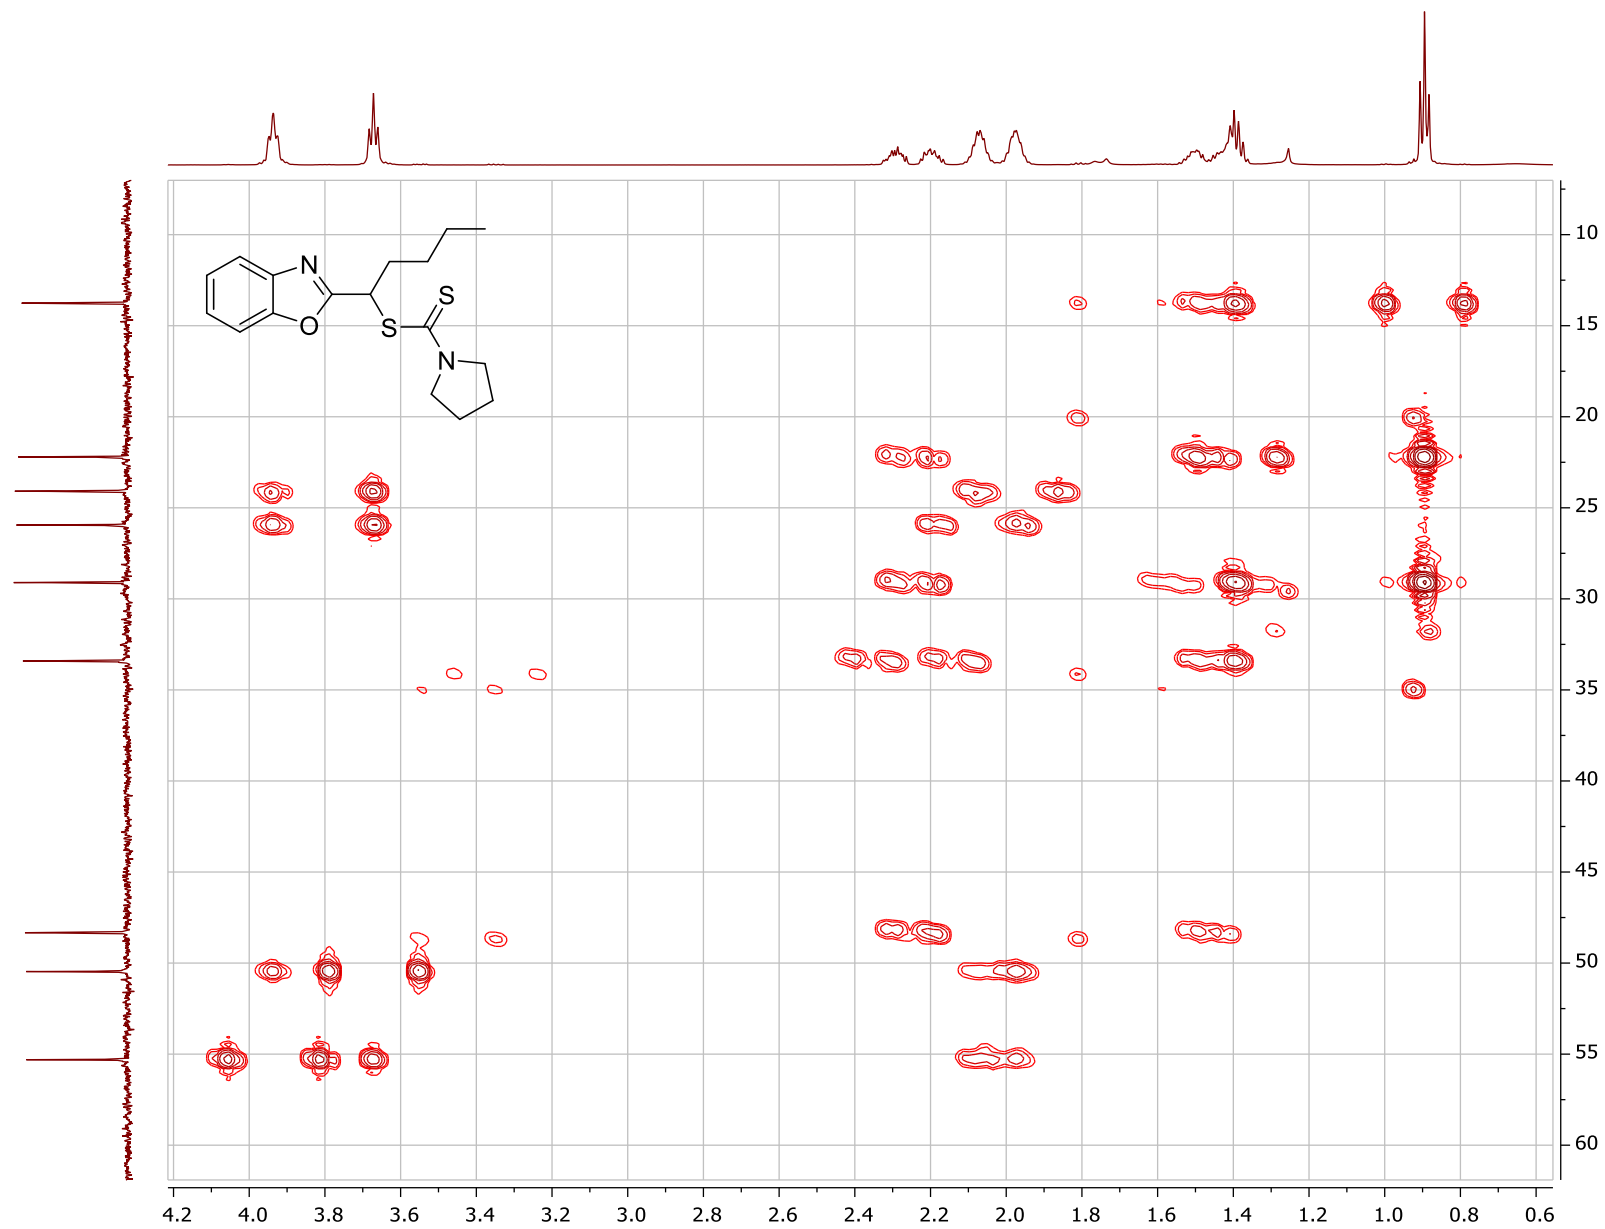

1-([2-(Pyrrolidin-4-ylcarbonyl)phenyl]amino)carbonyl)pentyl pyrrolidine-4-carbodithioate (11c)  $^1\text{H}$ - $^1\text{H}$  COSY

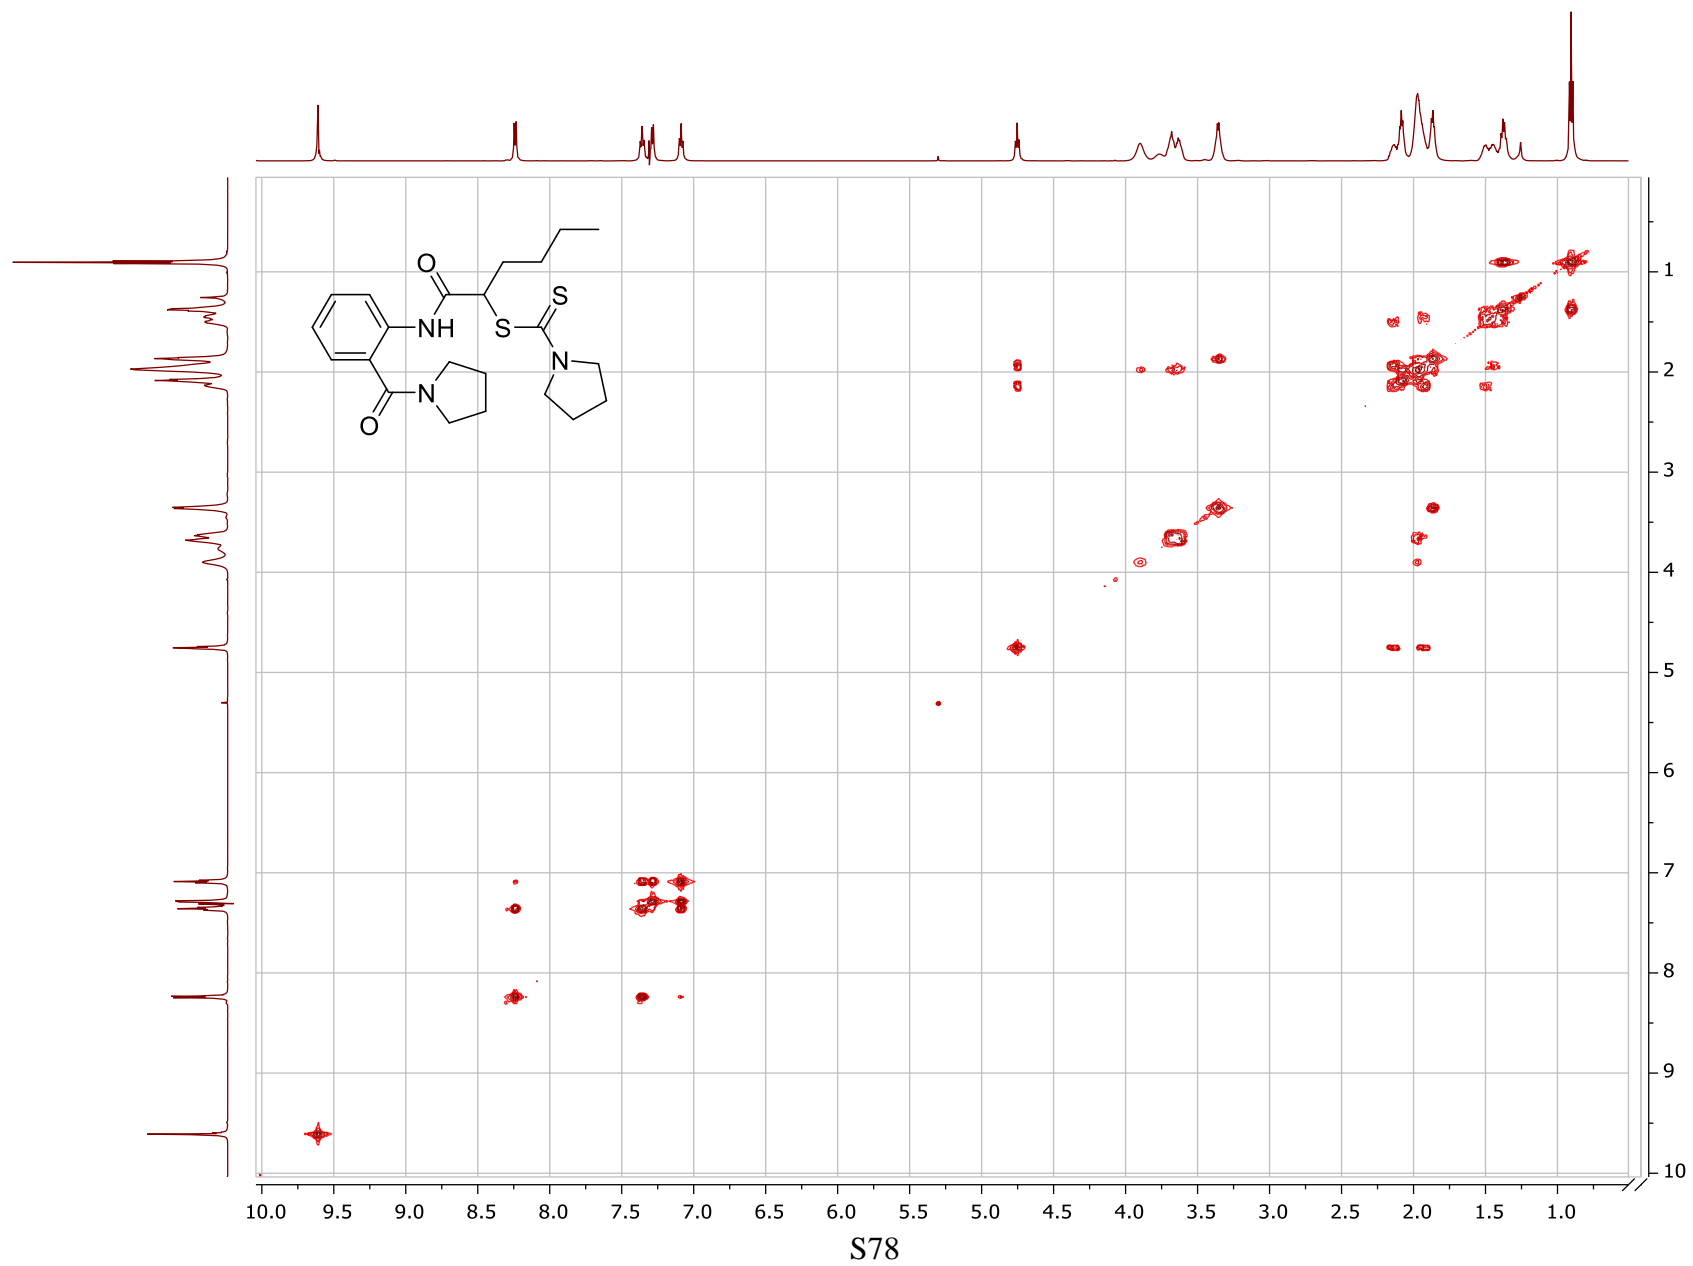

1-([2-(Pyrrolidin-4-ylcarbonyl)phenyl]amino)carbonyl)pentyl pyrrolidine-4-carbodithioate (11c)  $^1\text{H}$ - $^1\text{H}$  COSY

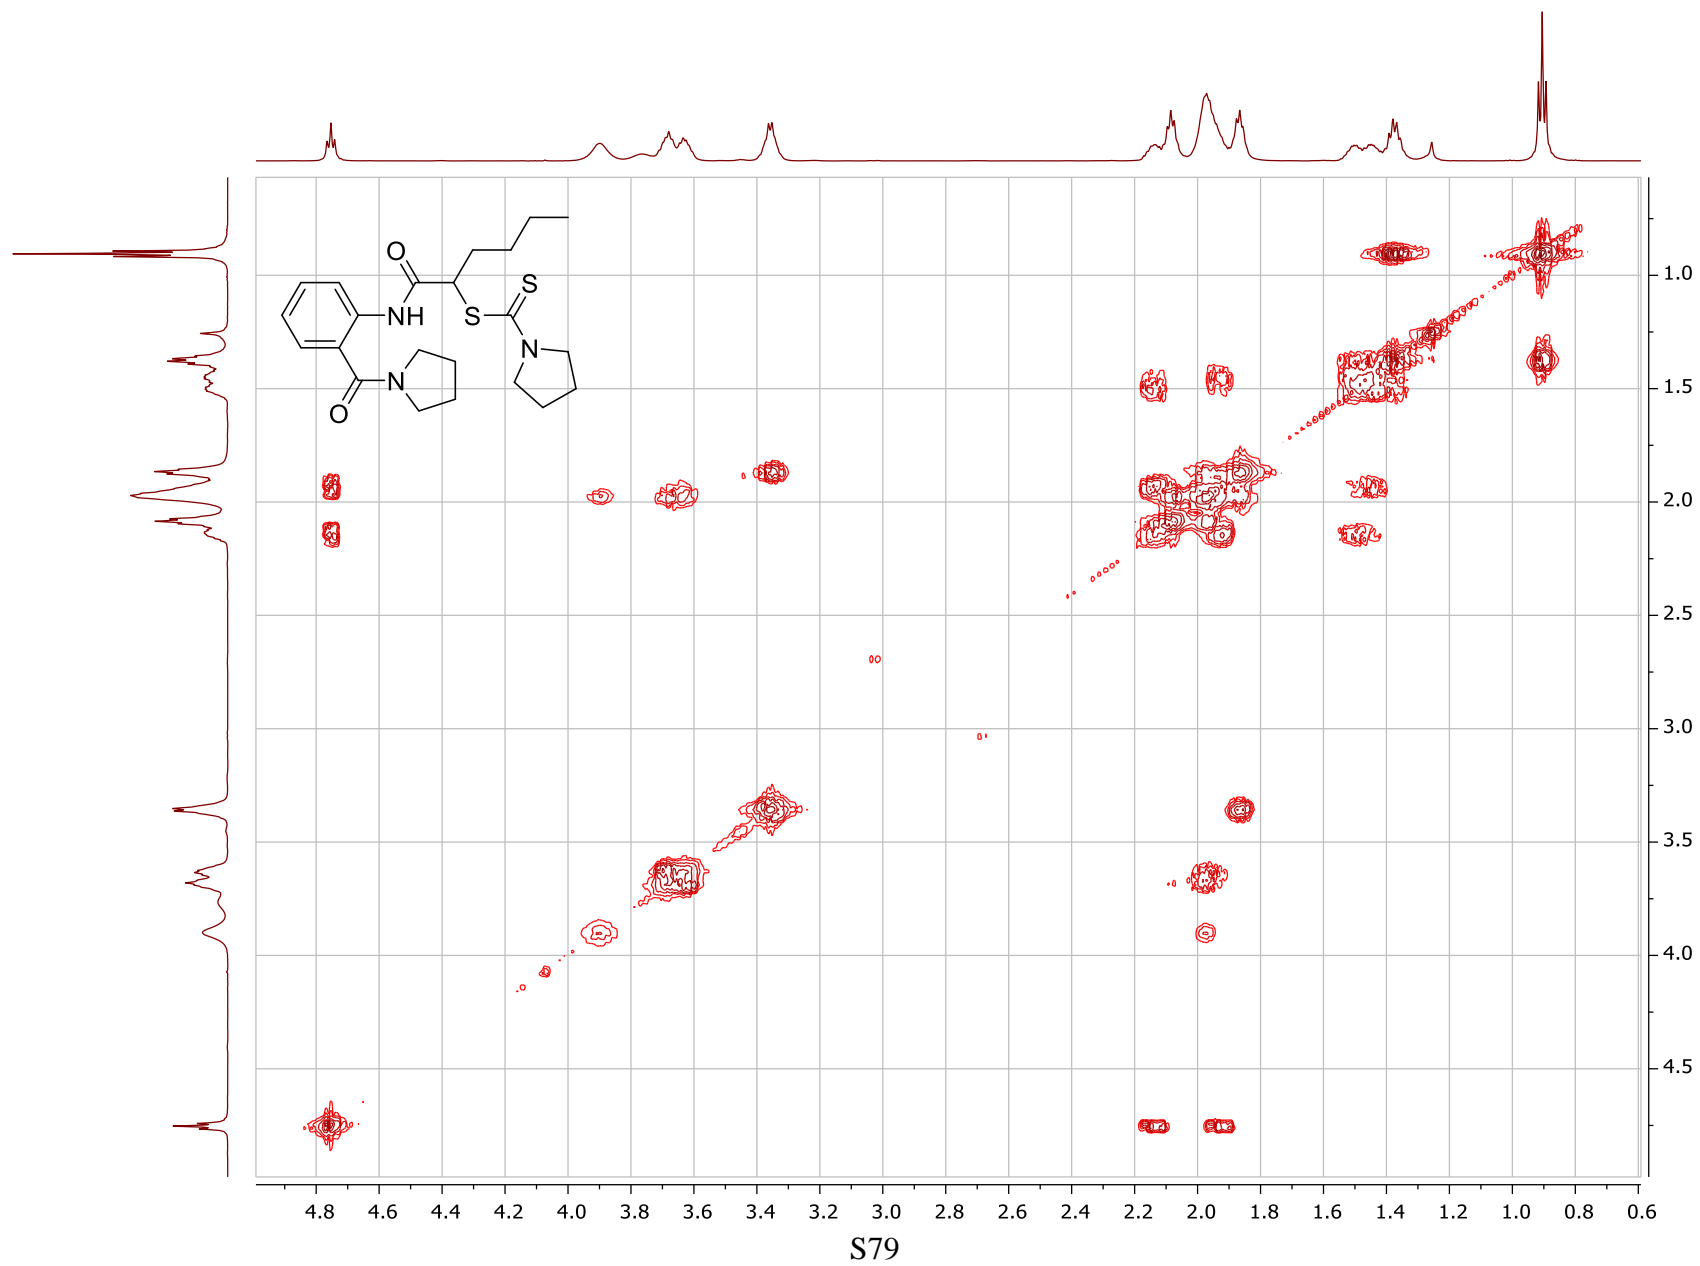

1-([2-(Pyrrolidin-4-ylcarbonyl)phenyl]amino)carbonylpentyl pyrrolidine-4-carbodithioate (11c)  $^1\text{H}$ - $^{13}\text{C}$  HSQC

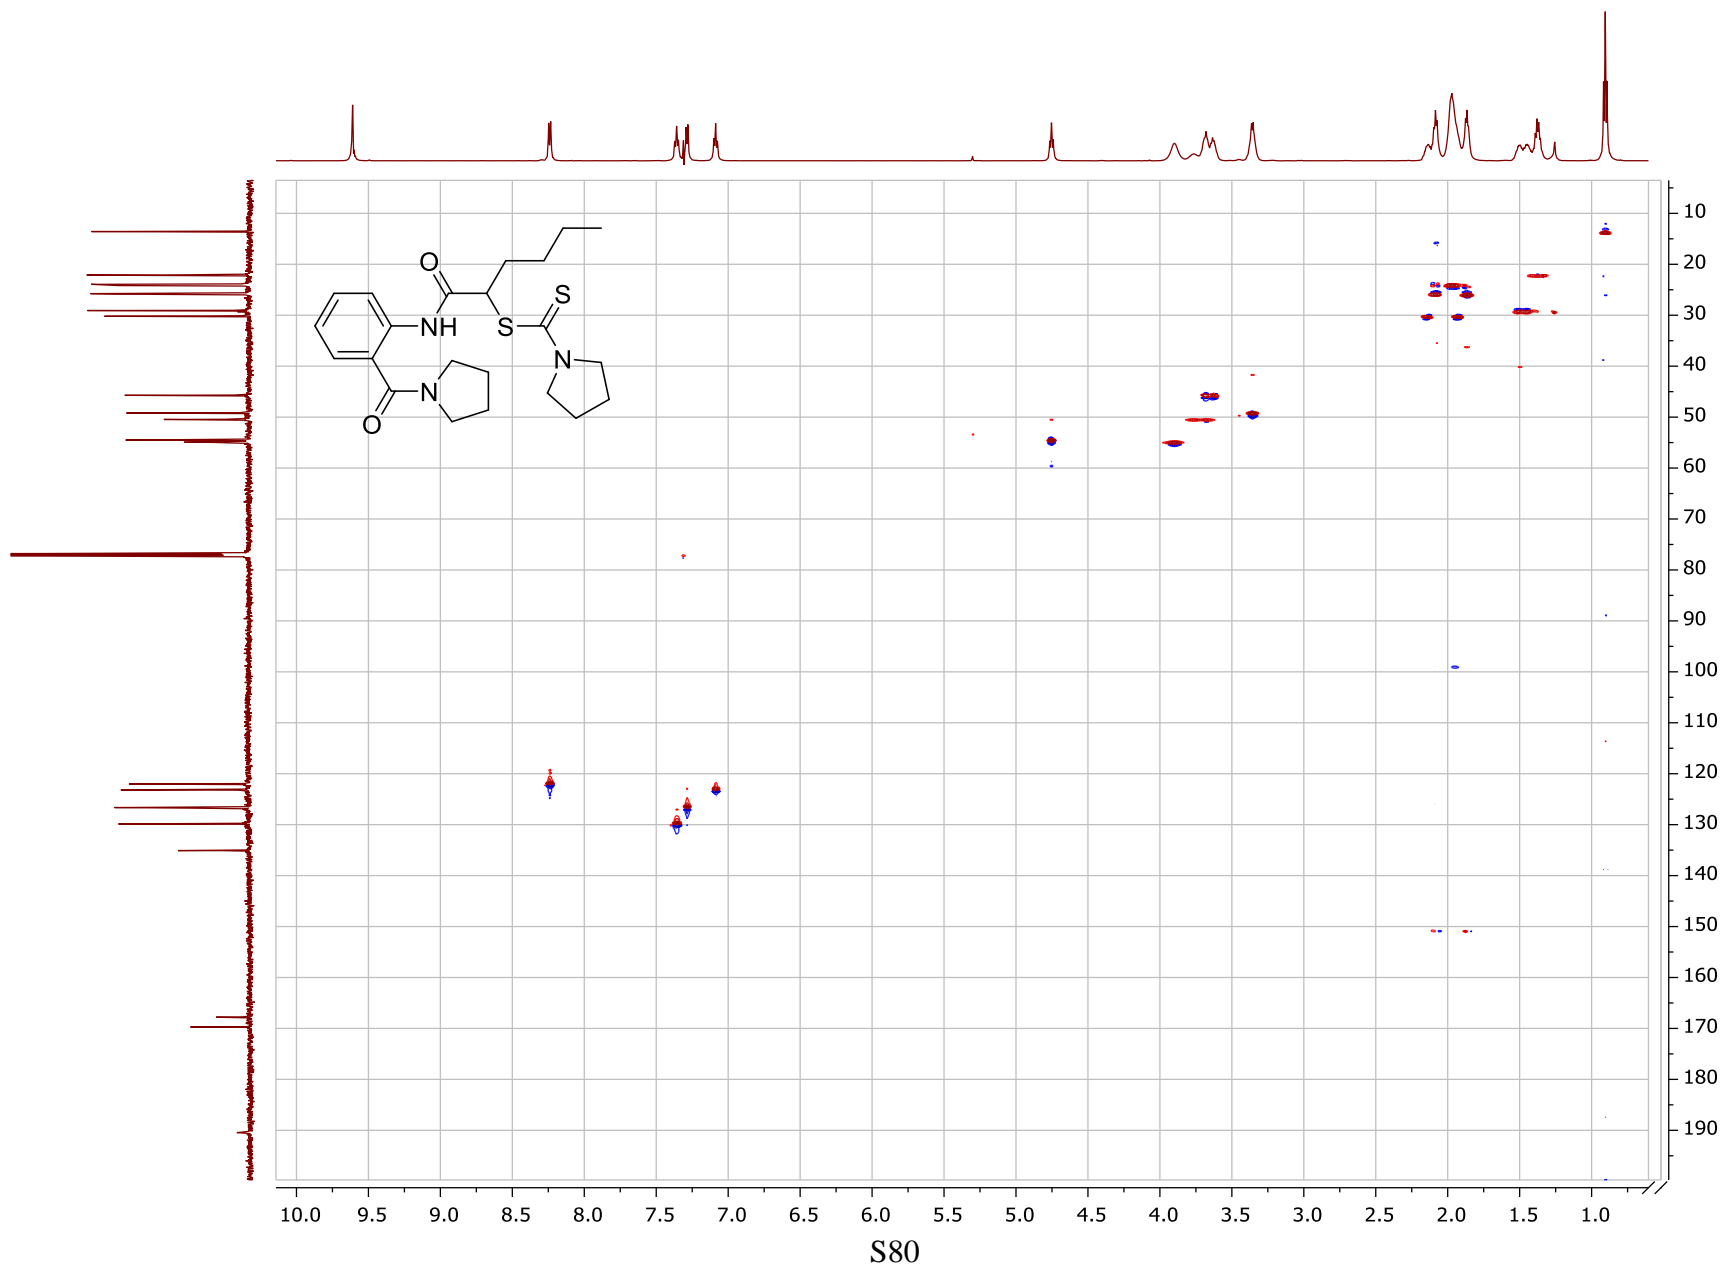



1-([2-(Pyrrolidin-4-ylcarbonyl)phenyl]amino)carbonylpentyl pyrrolidine-4-carbodithioate (11c)  $^1\text{H}$ - $^{13}\text{C}$  HSQC

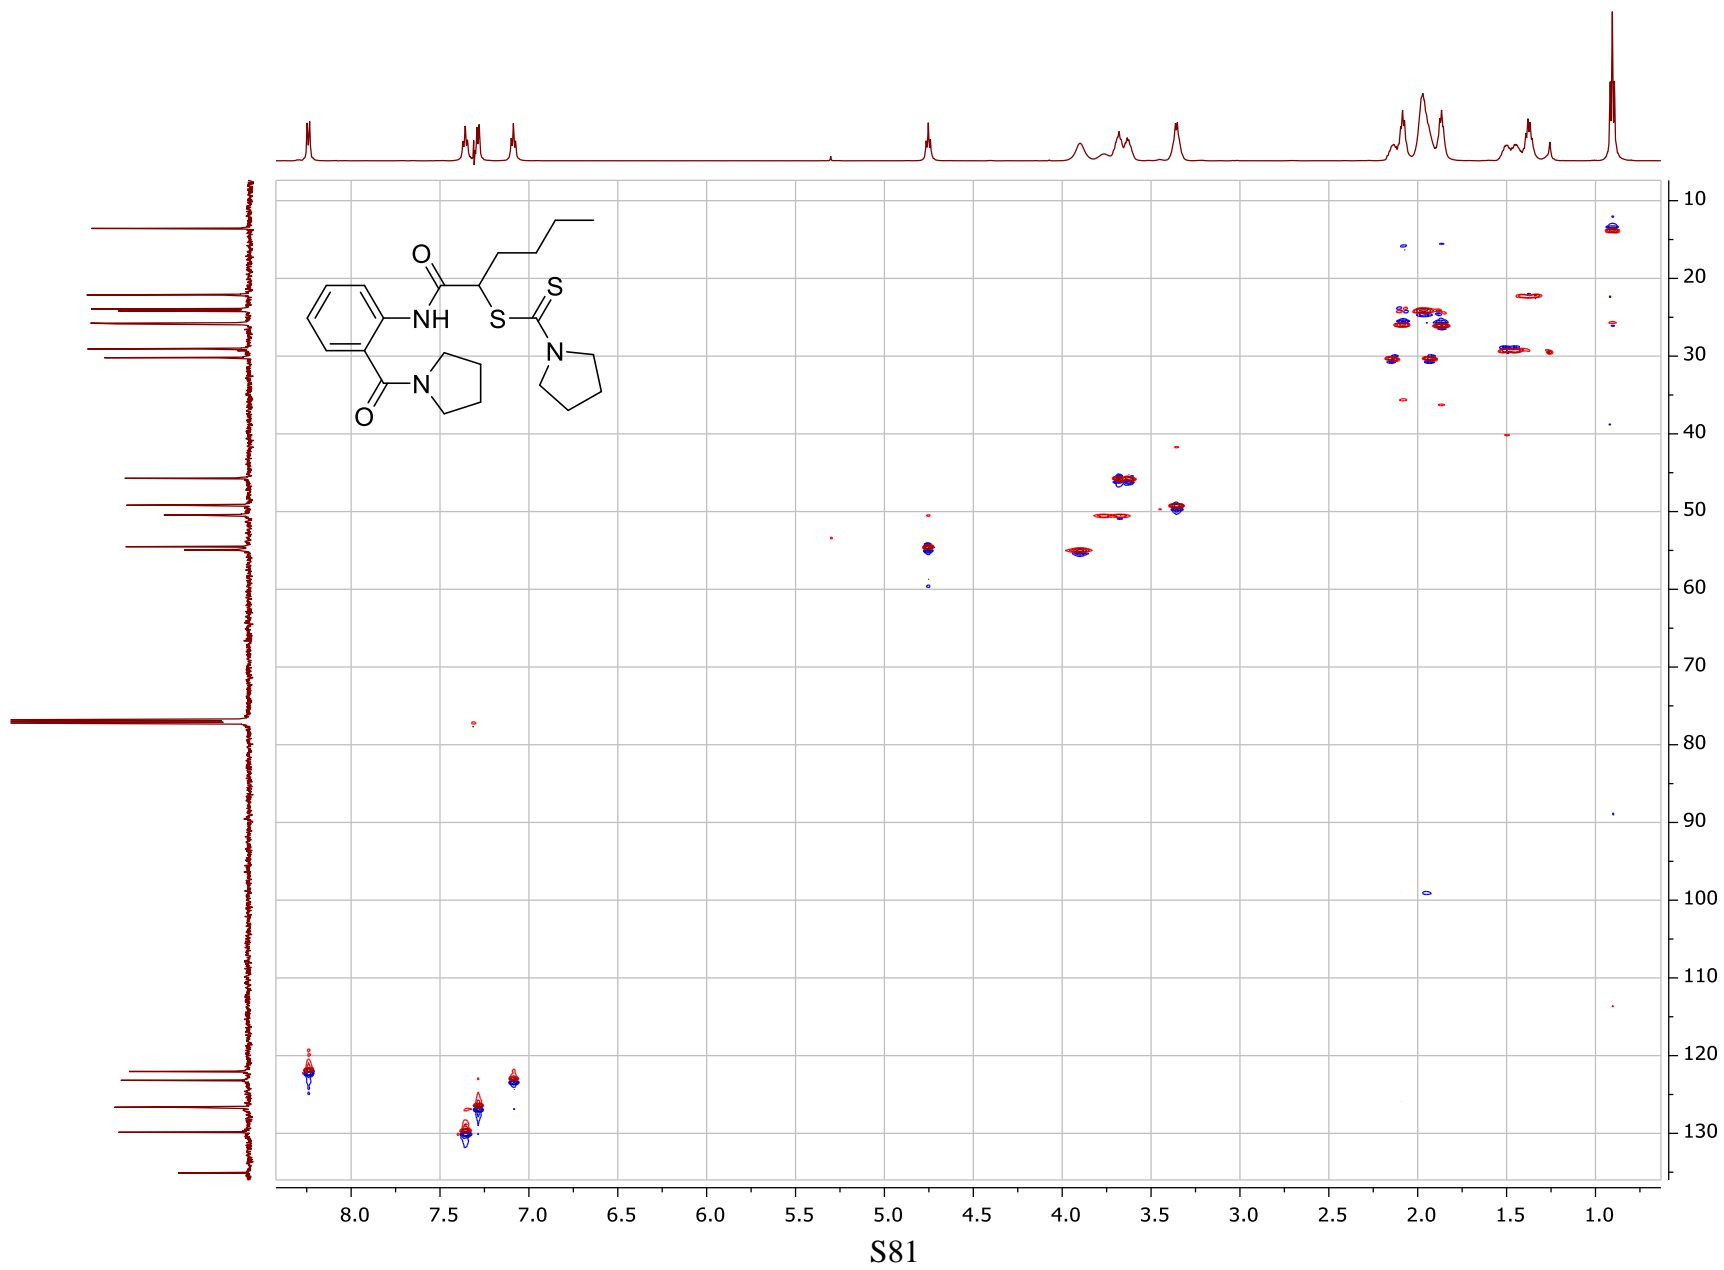

1-([2-(Pyrrolidin-4-ylcarbonyl)phenyl]amino)carbonyl)pentyl pyrrolidine-4-carbodithioate (11c)  $^1\text{H}$ - $^{13}\text{C}$  HMBC

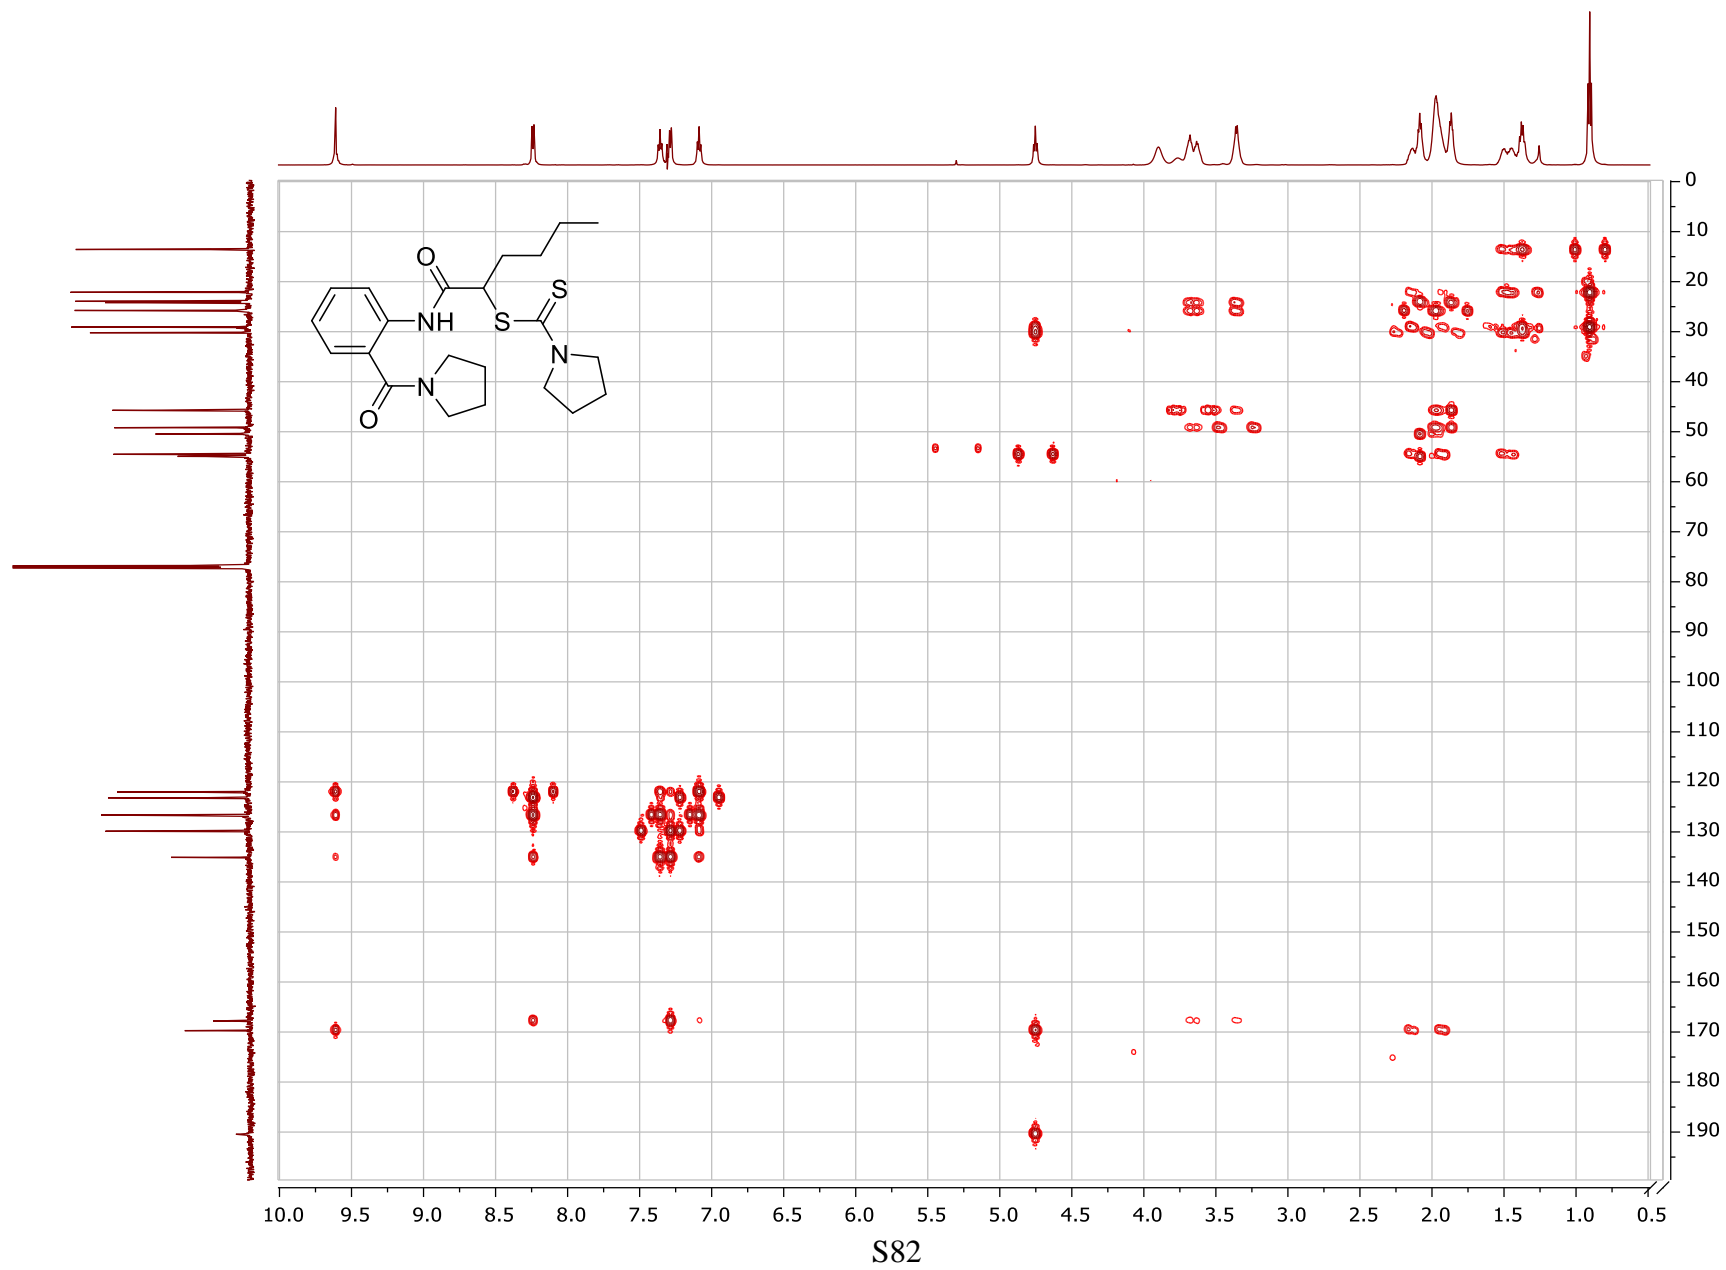

1-([2-(Pyrrolidin-4-ylcarbonyl)phenyl]amino)carbonyl)pentyl pyrrolidine-4-carbodithioate (11c)  $^1\text{H}$ - $^{13}\text{C}$  HMBC

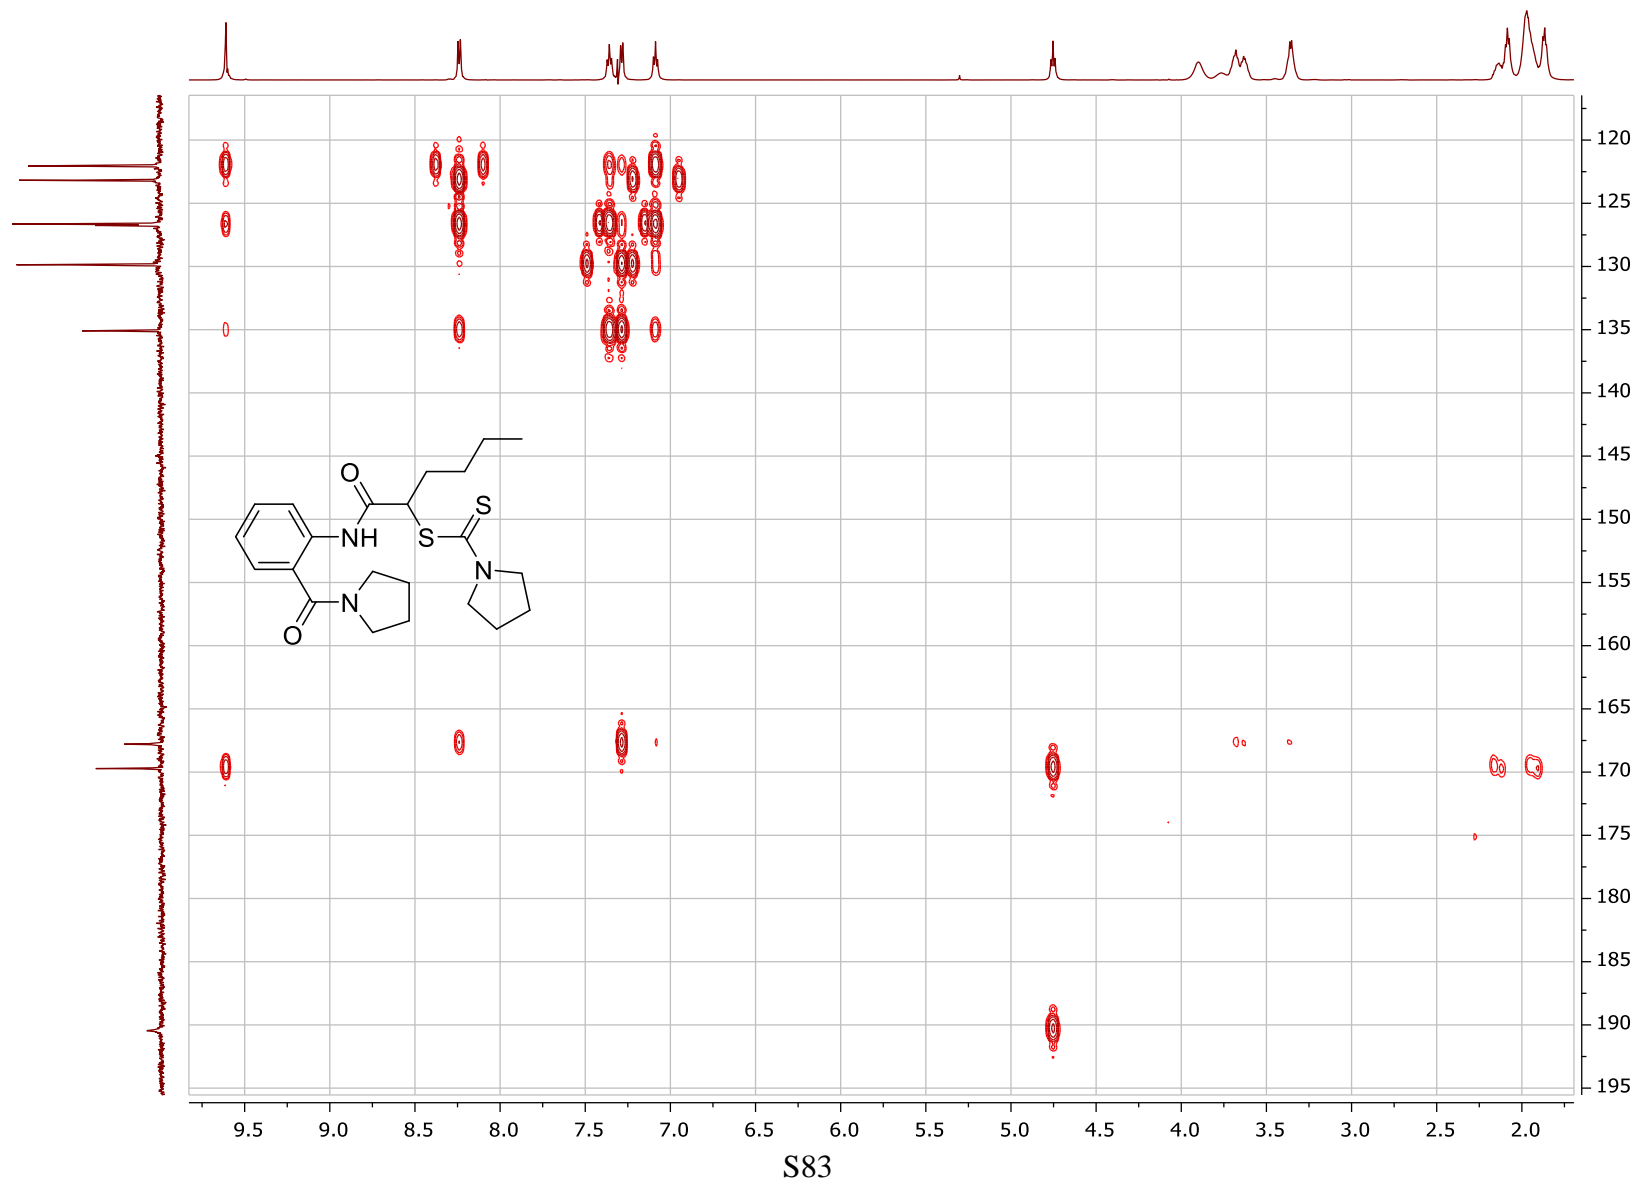

1-([2-(Pyrrolidin-4-ylcarbonyl)phenyl]amino)carbonyl)pentyl pyrrolidine-4-carbodithioate (11c)  $^1\text{H}$ - $^{13}\text{C}$  HMBC

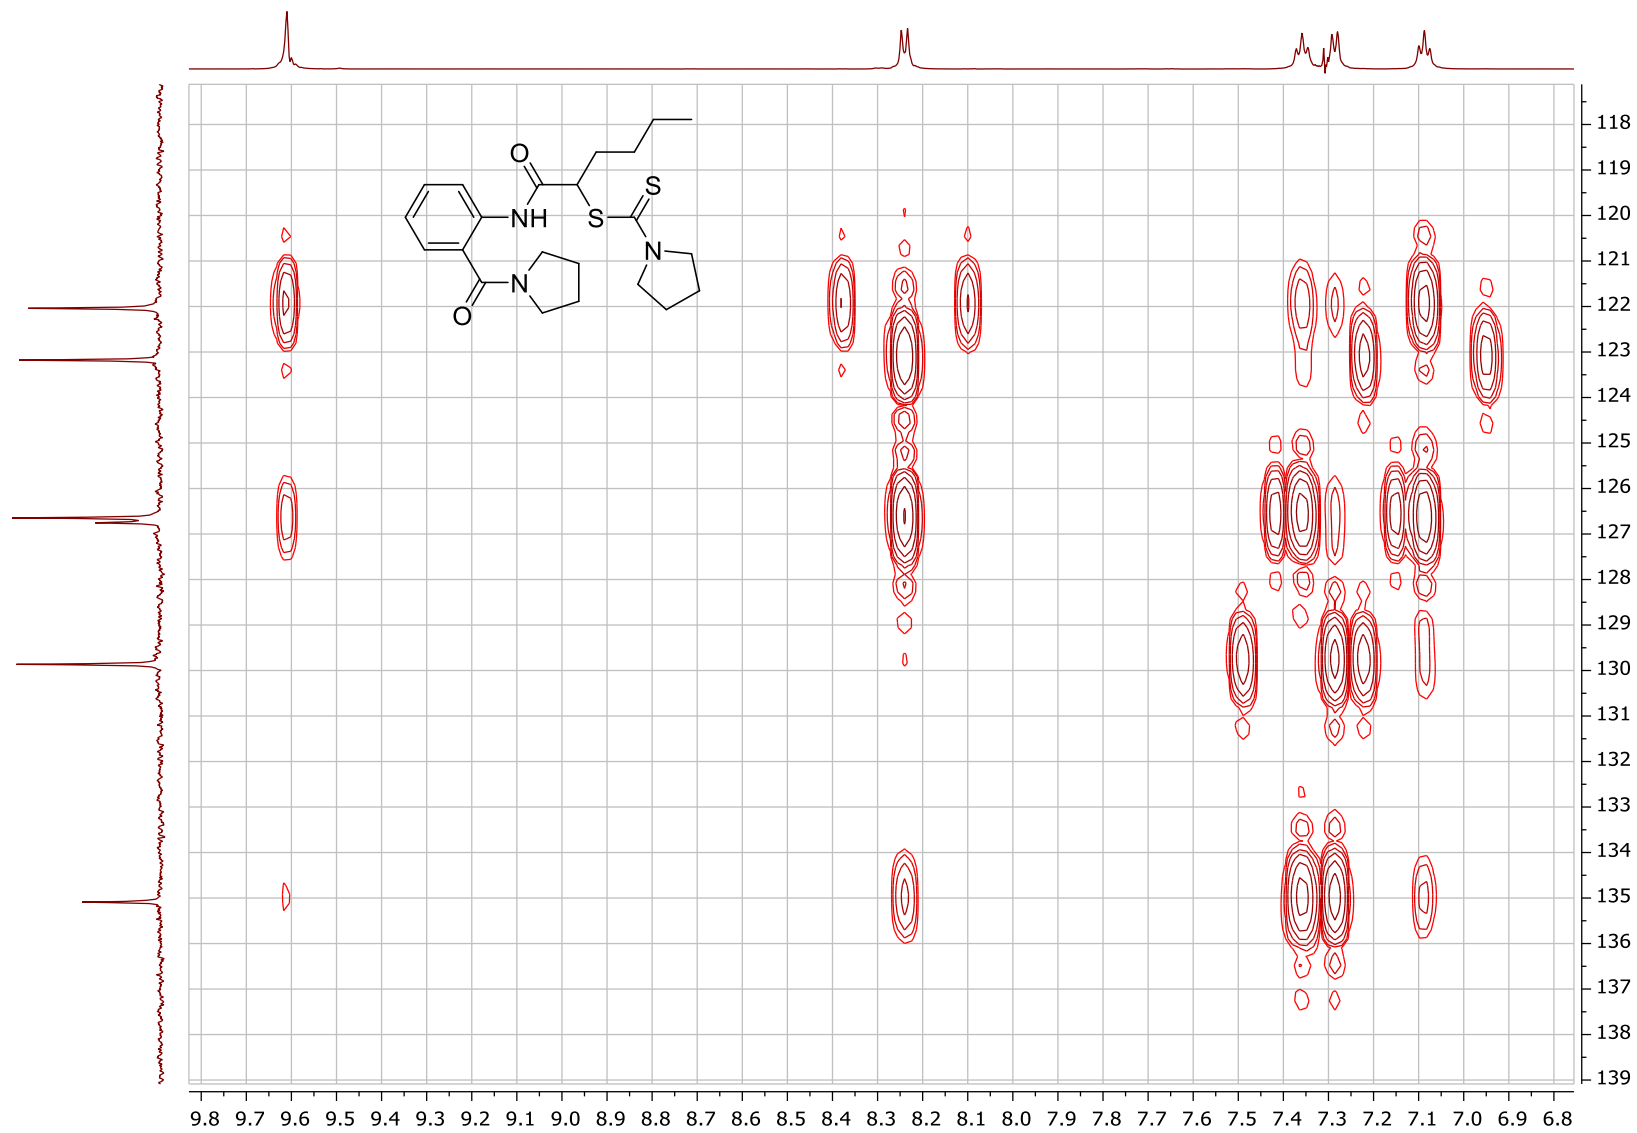

1-([2-(Pyrrolidin-4-ylcarbonyl)phenyl]amino)carbonyl)pentyl pyrrolidine-4-carbodithioate (11c)  $^1\text{H}$ - $^{13}\text{C}$  HMBC

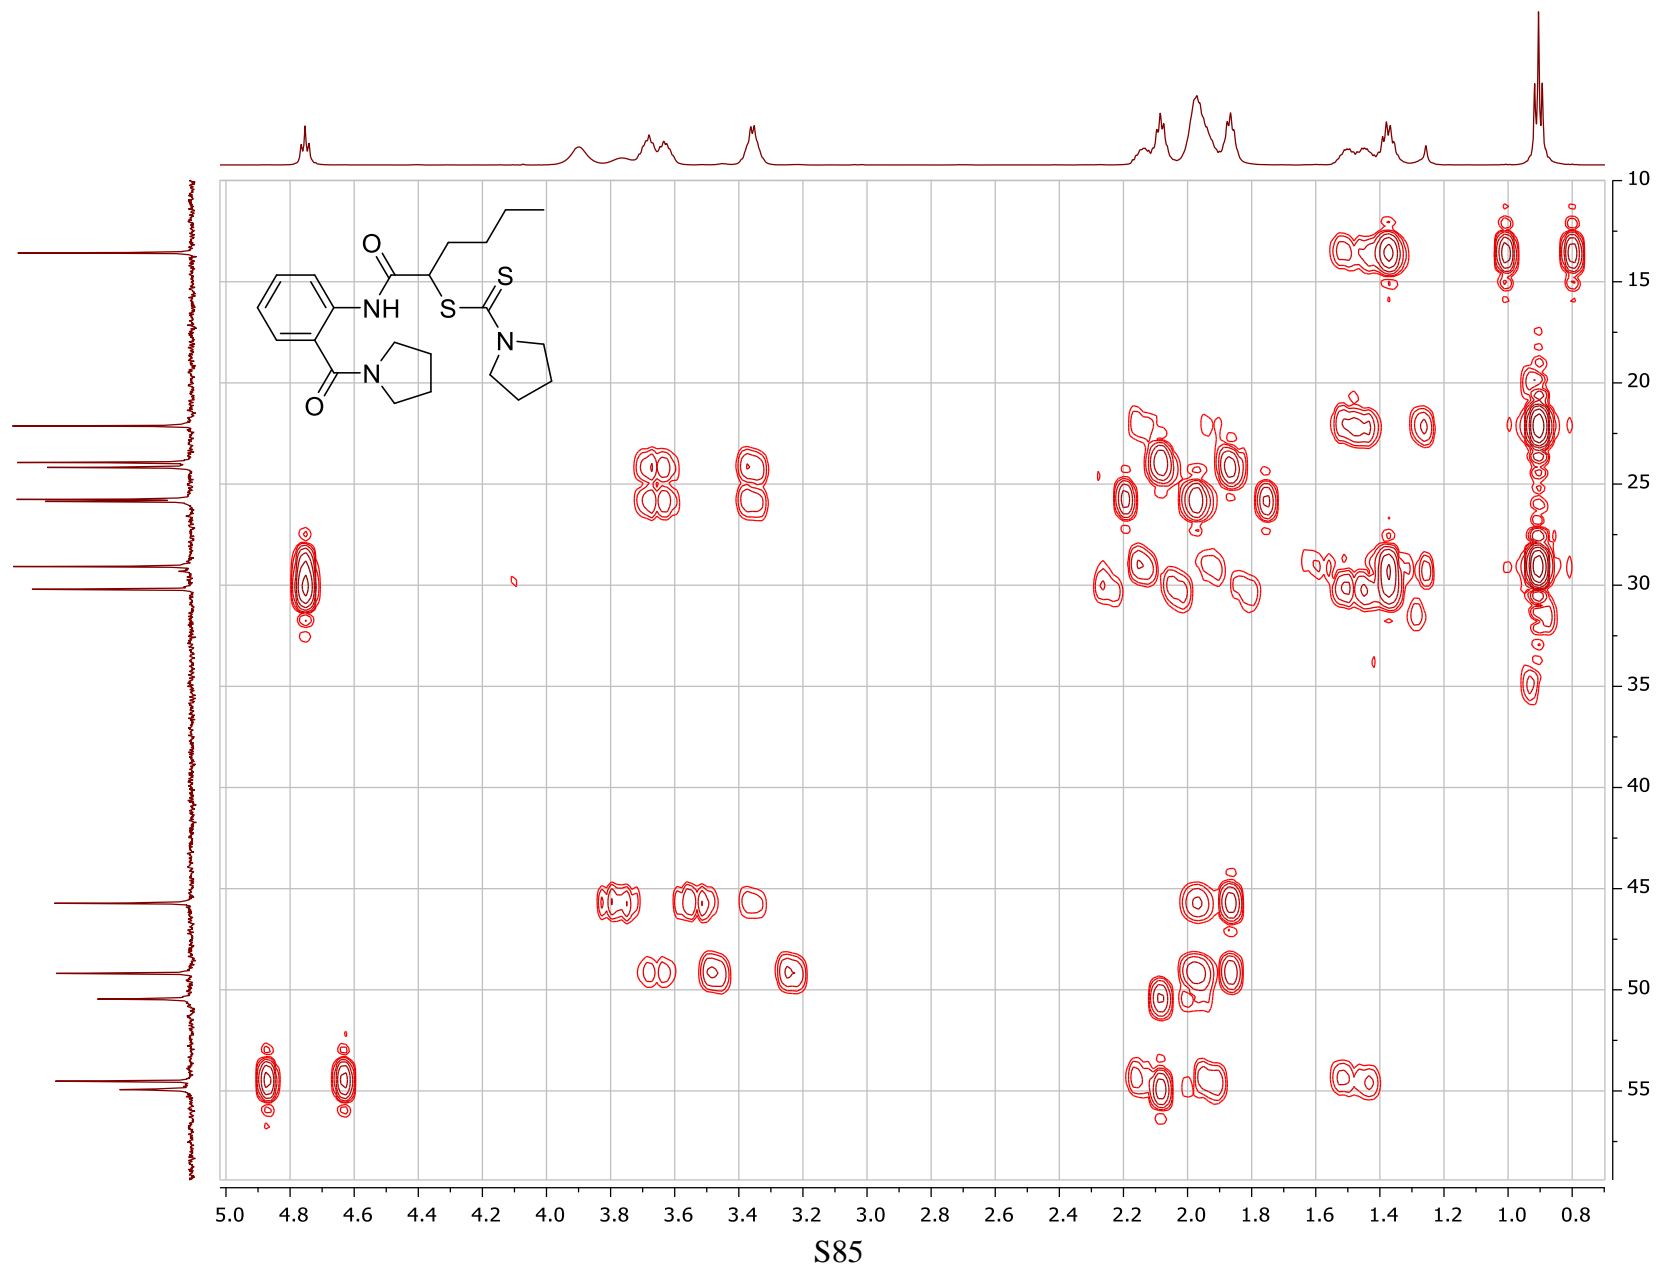

# Copies of IR spectra

## 2-[5-Iodo-4-(2-phenylethyl)-1H-1,2,3-triazol-1-yl]phenol (1j)

IR (neat)

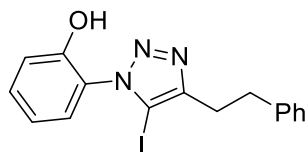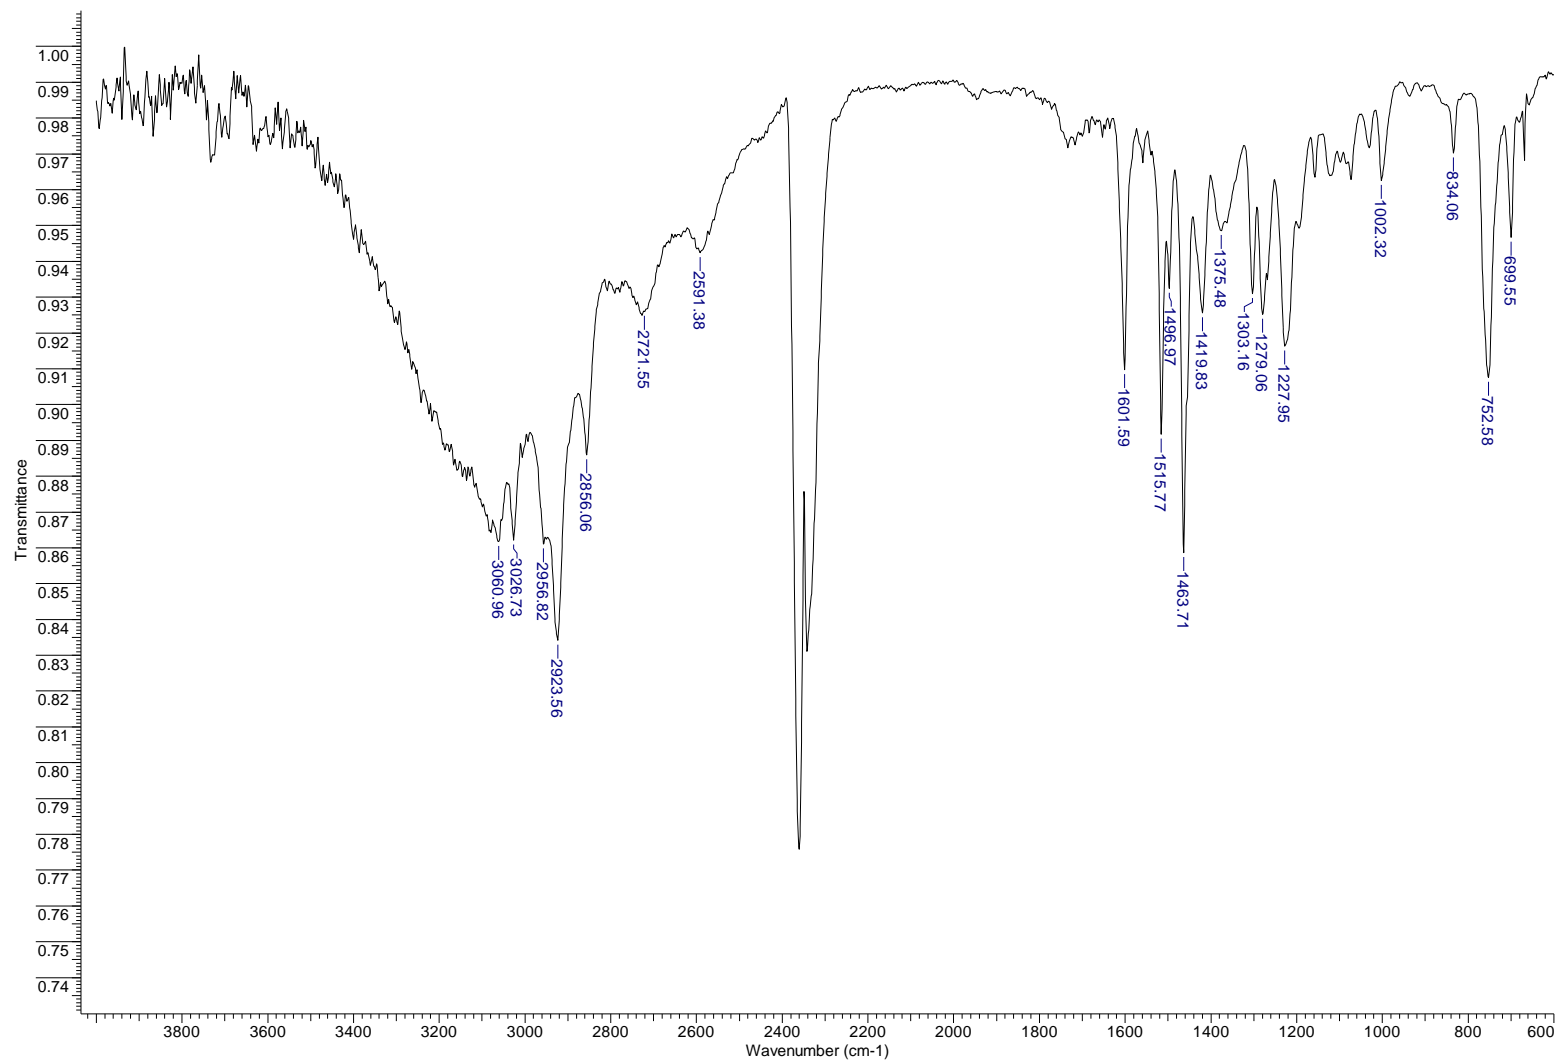

### 1-(1,3-Benzoxazol-2-yl)pentyl morpholine-4-carbodithioate (3a)

IR (neat)

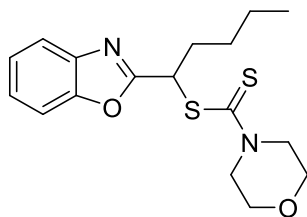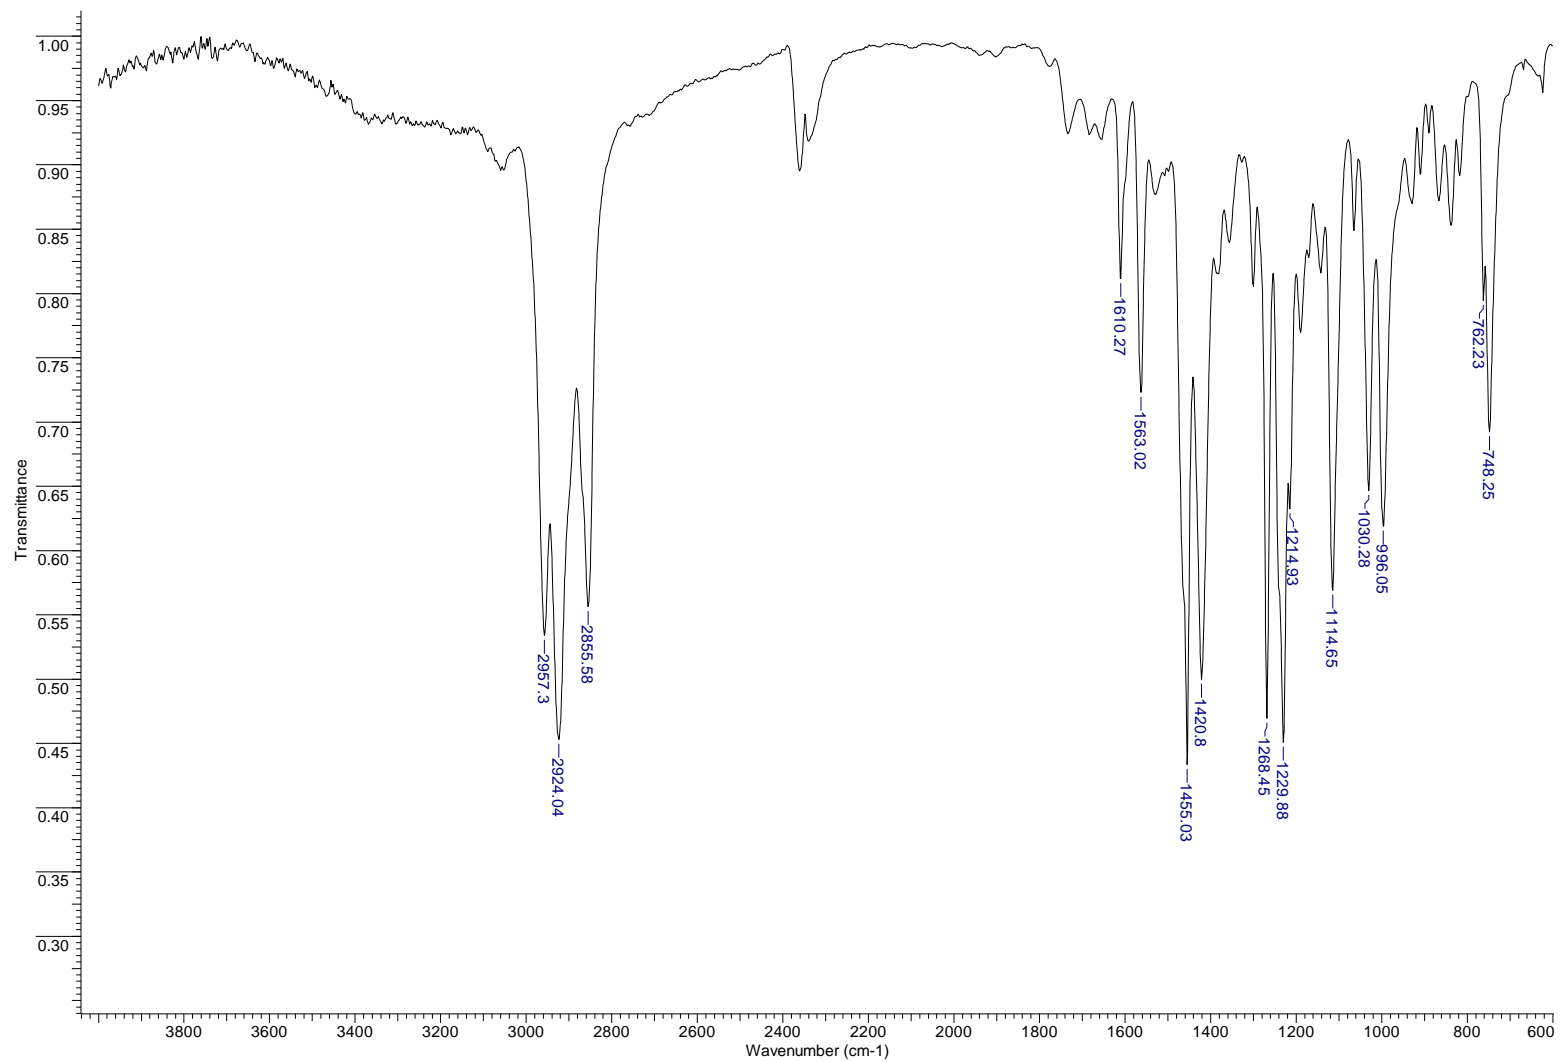

### 1-(1,3-Benzoxazol-2-yl)pentyl thiomorpholine-4-carbodithioate (3b)

IR (neat)

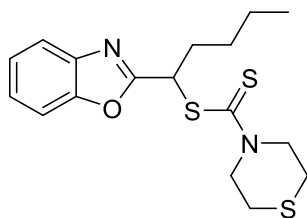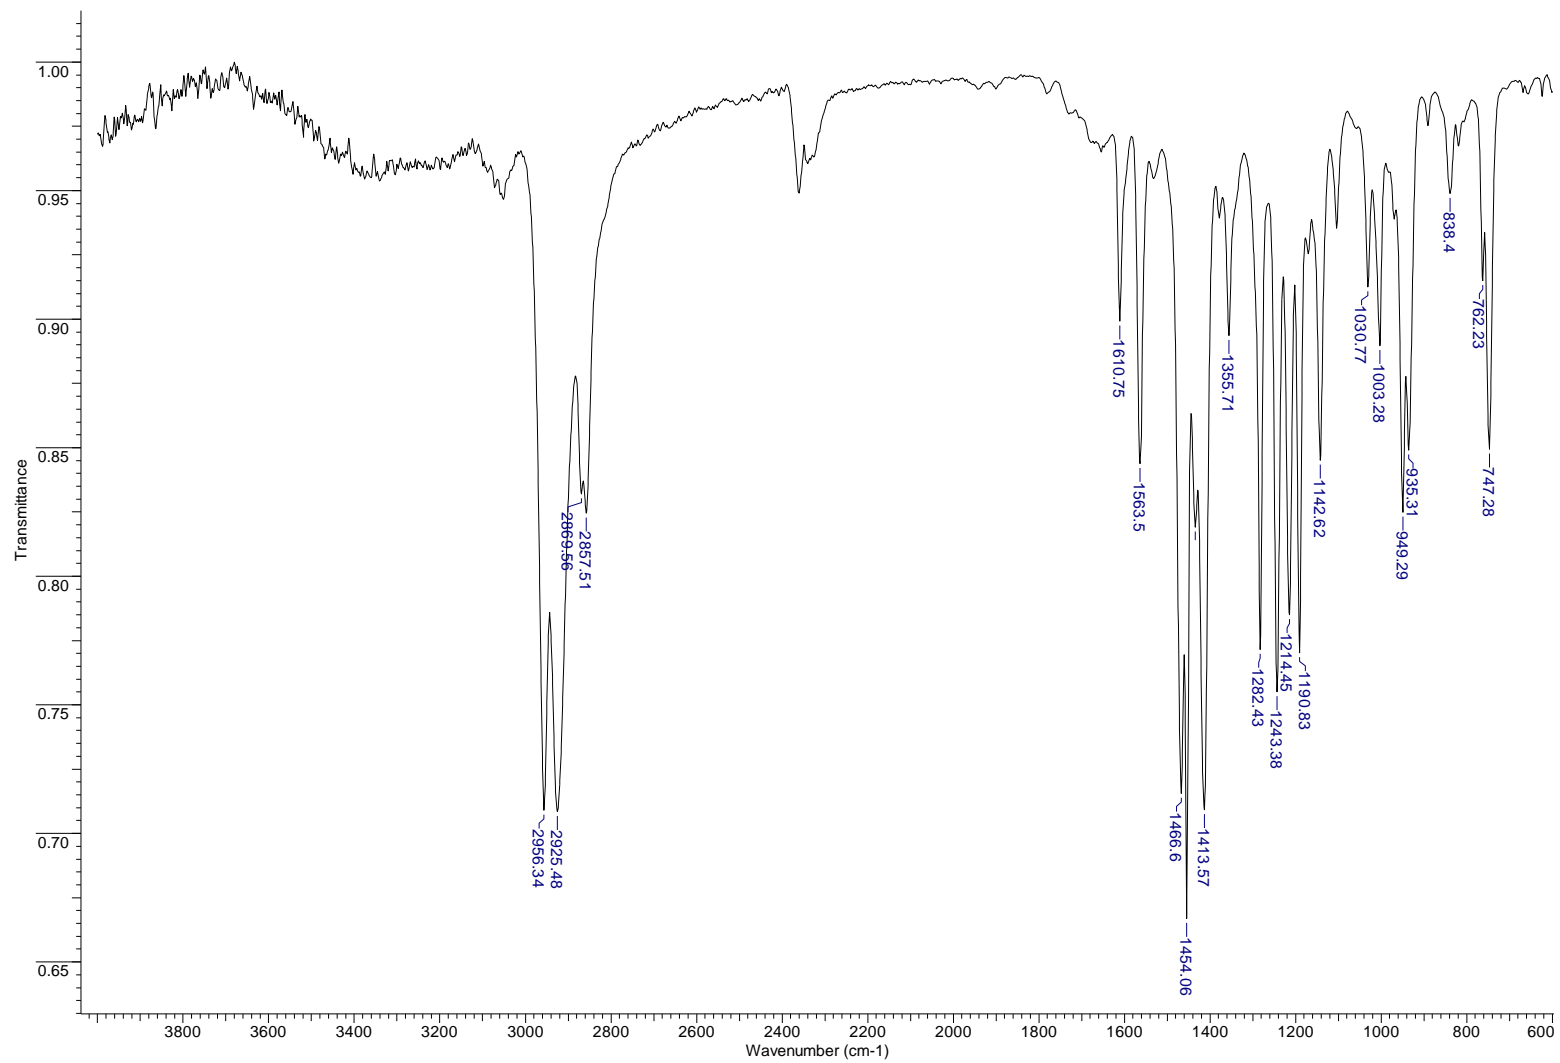



### 1-(1,3-Benzoxazol-2-yl)pentyl piperidine-4-carbodithioate (3c)

IR (neat)

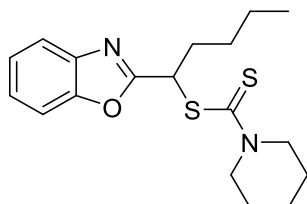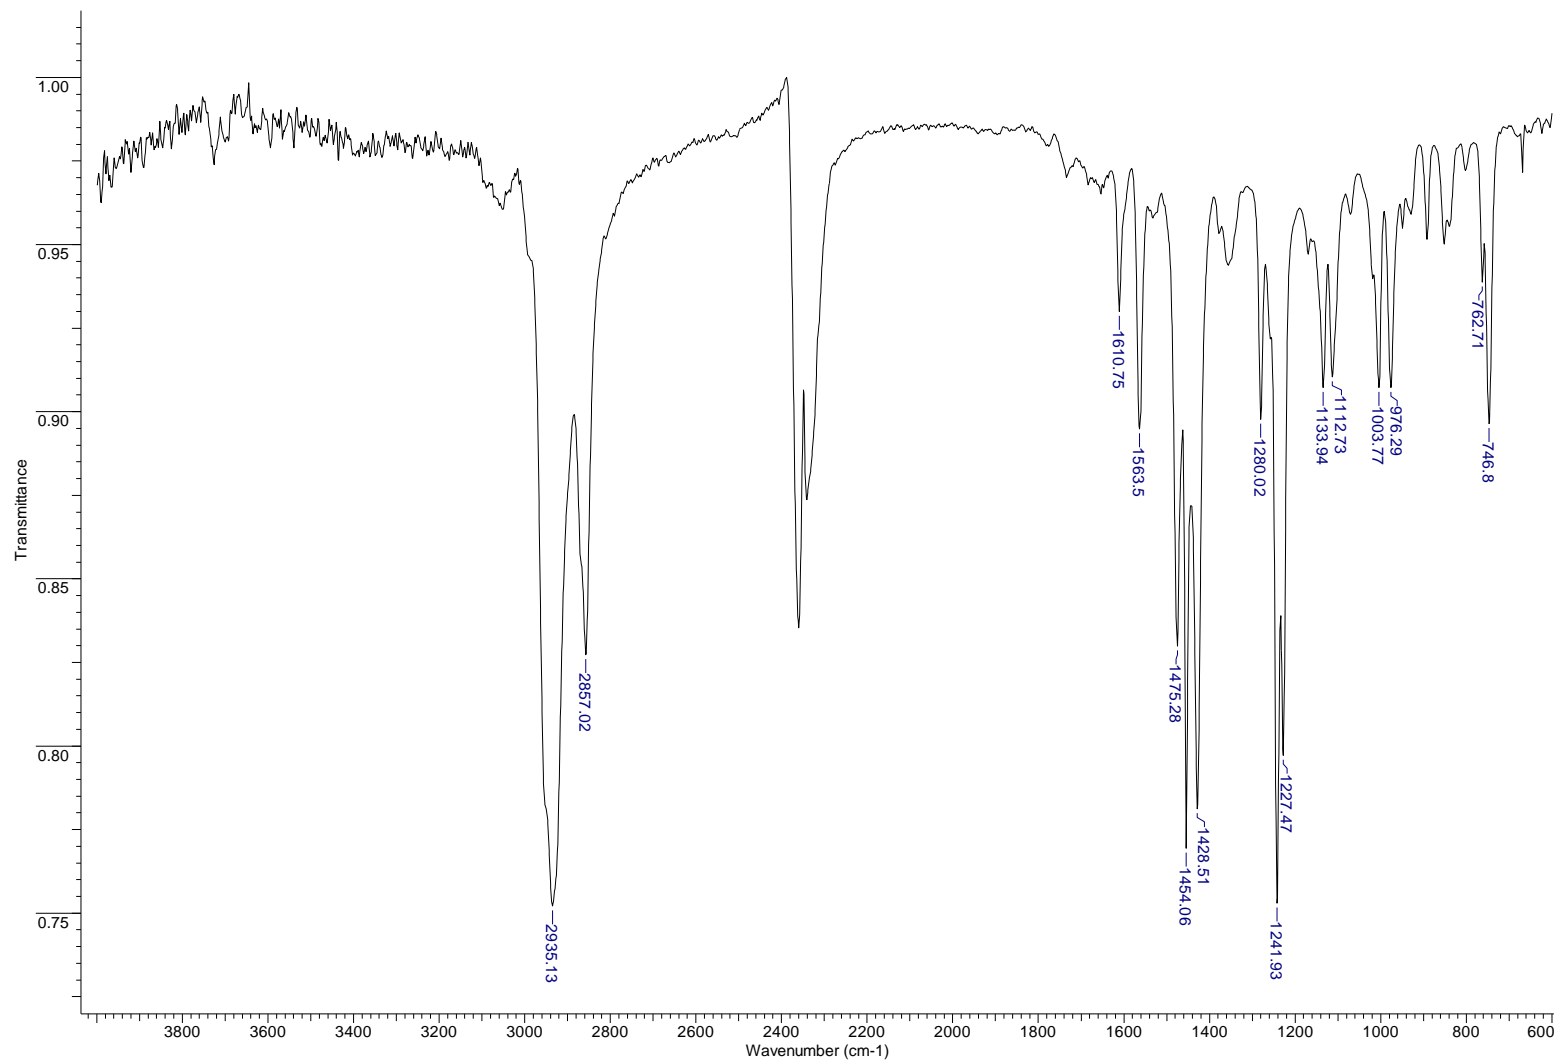

### 1-(1,3-Benzoxazol-2-yl)pentyl pyrrolidine-4-carbodithioate (3d)

IR (neat)

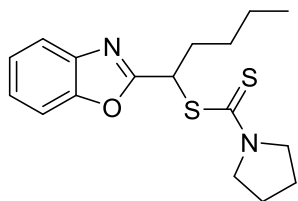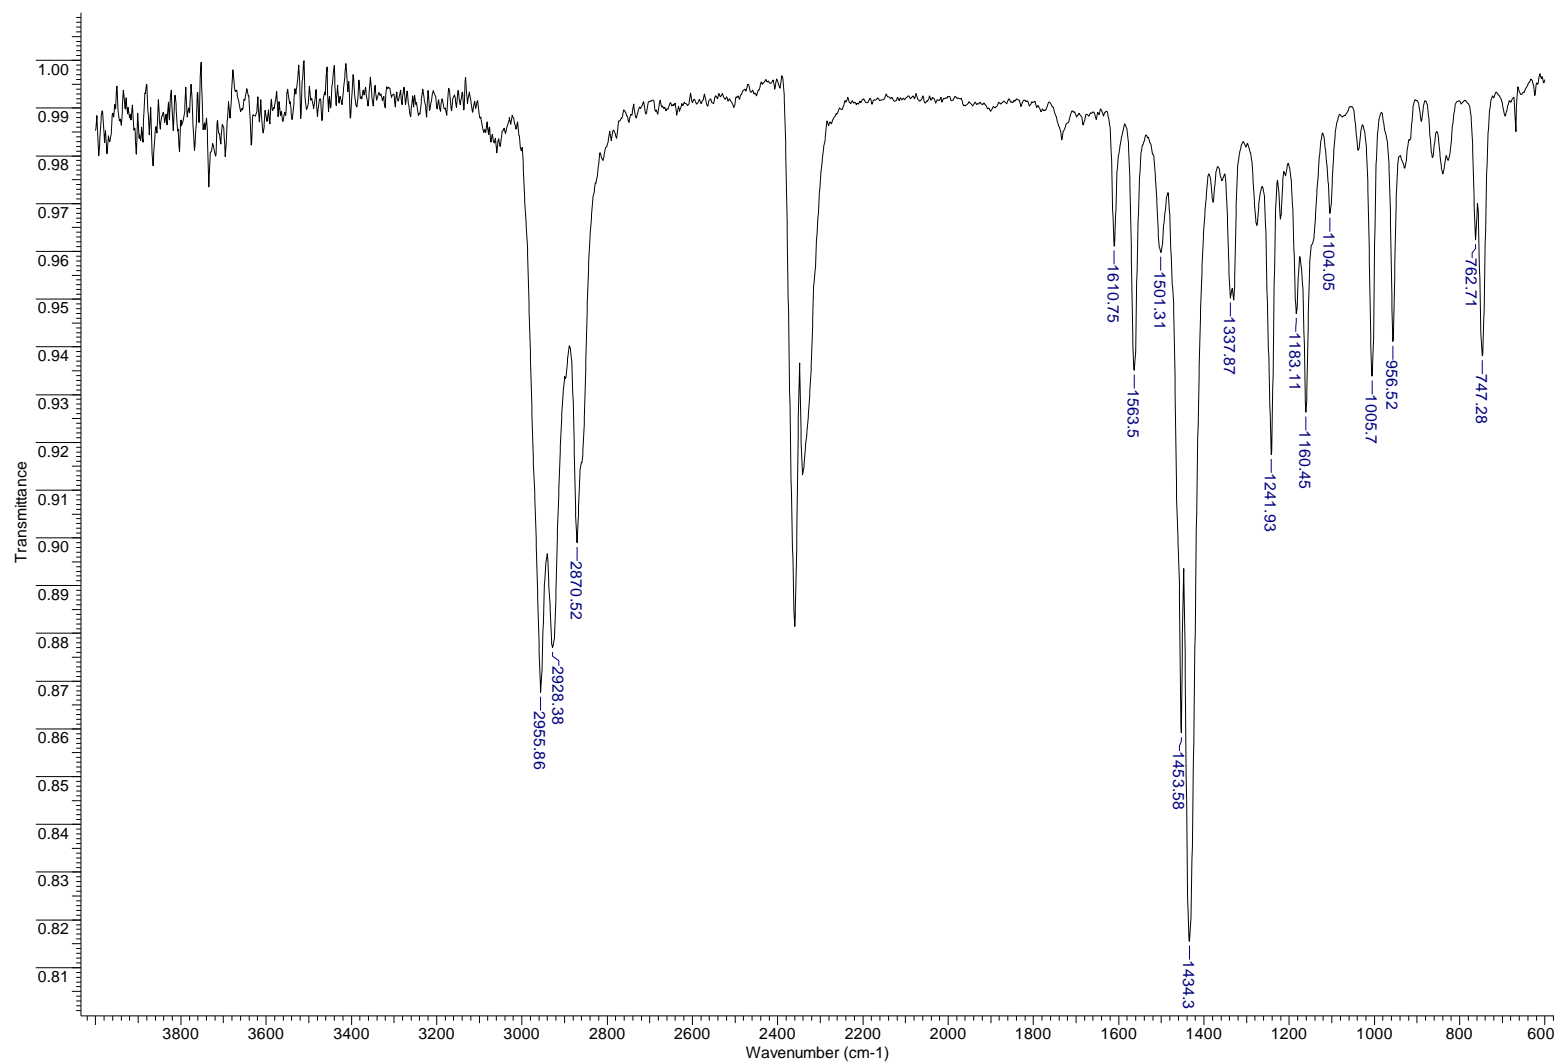

# 1-(1,3-Benzoxazol-2-yl)pentyl (2*R*,6*S*)-2,6-dimethylmorpholine-4-carbodithioate (3e)

IR (neat)

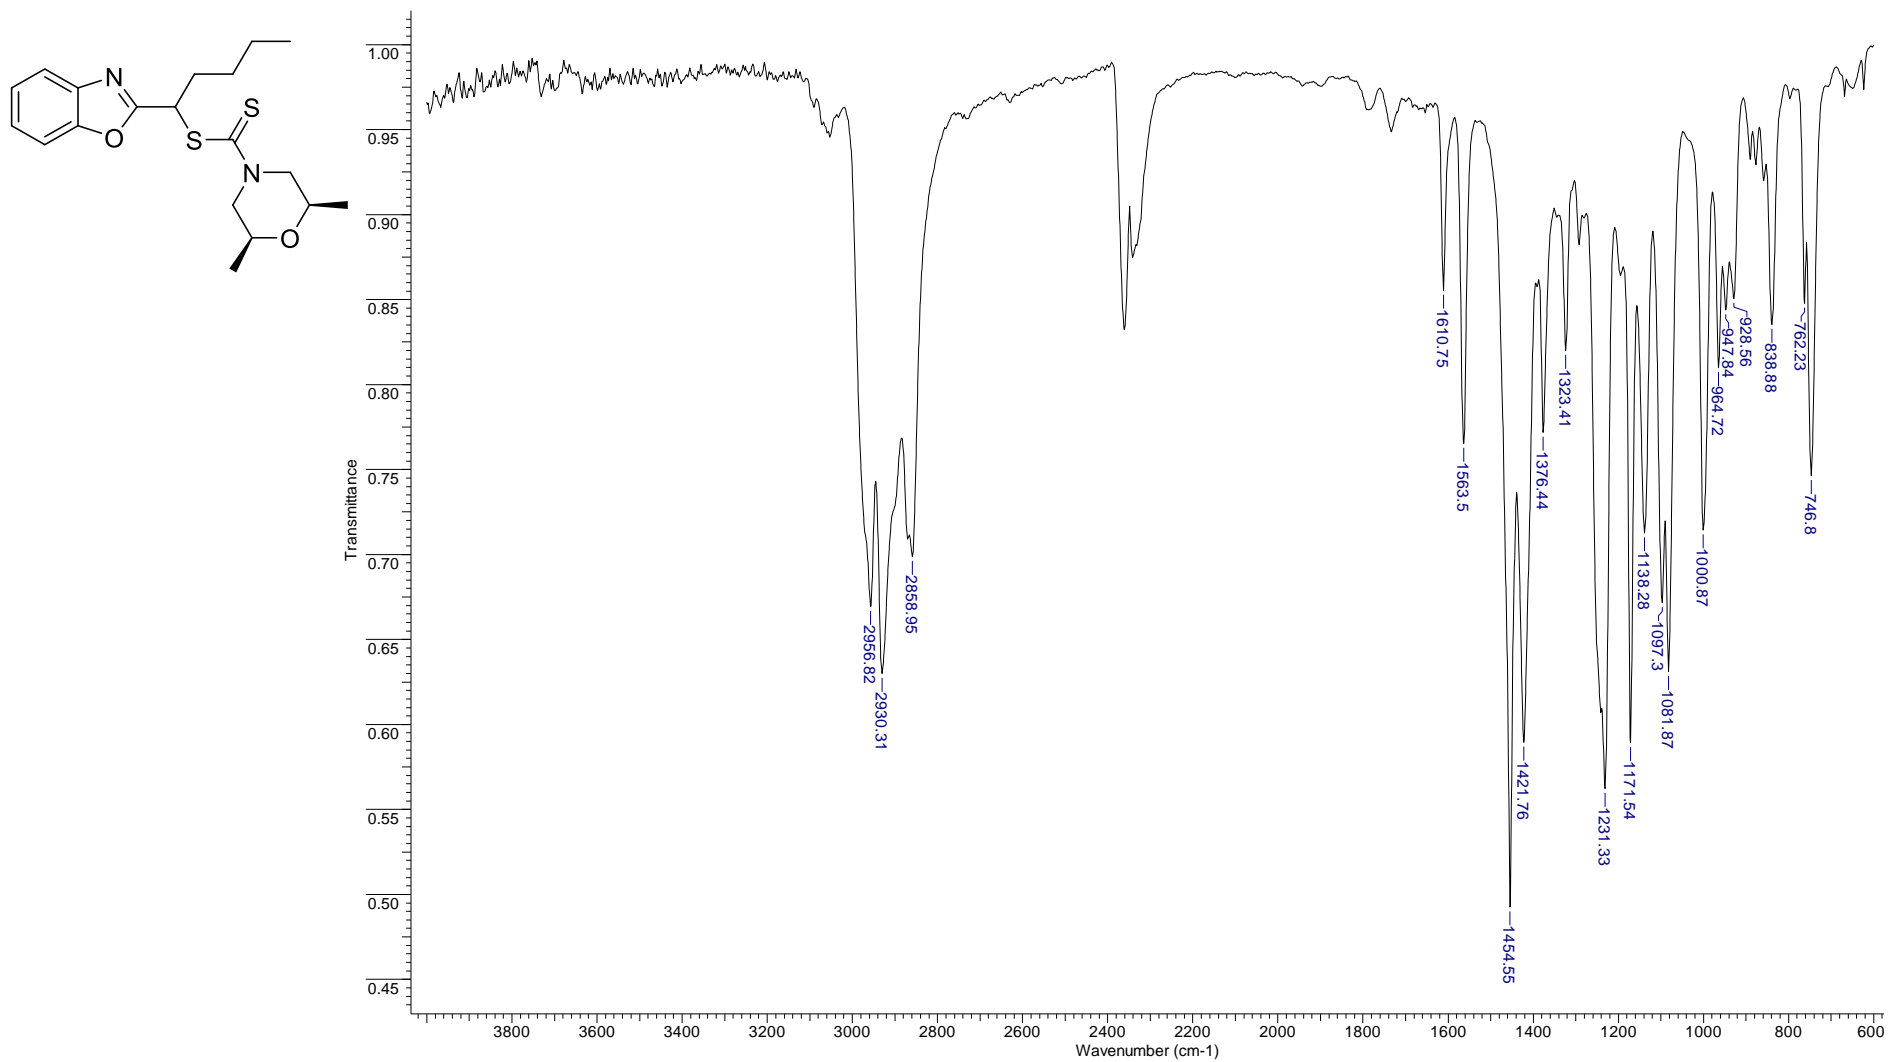

### 1-(1,3-Benzoxazol-2-yl)pentyl 4-acetylpiperazine-1-carbodithioate (3f)

IR (neat)

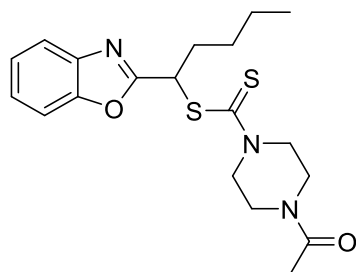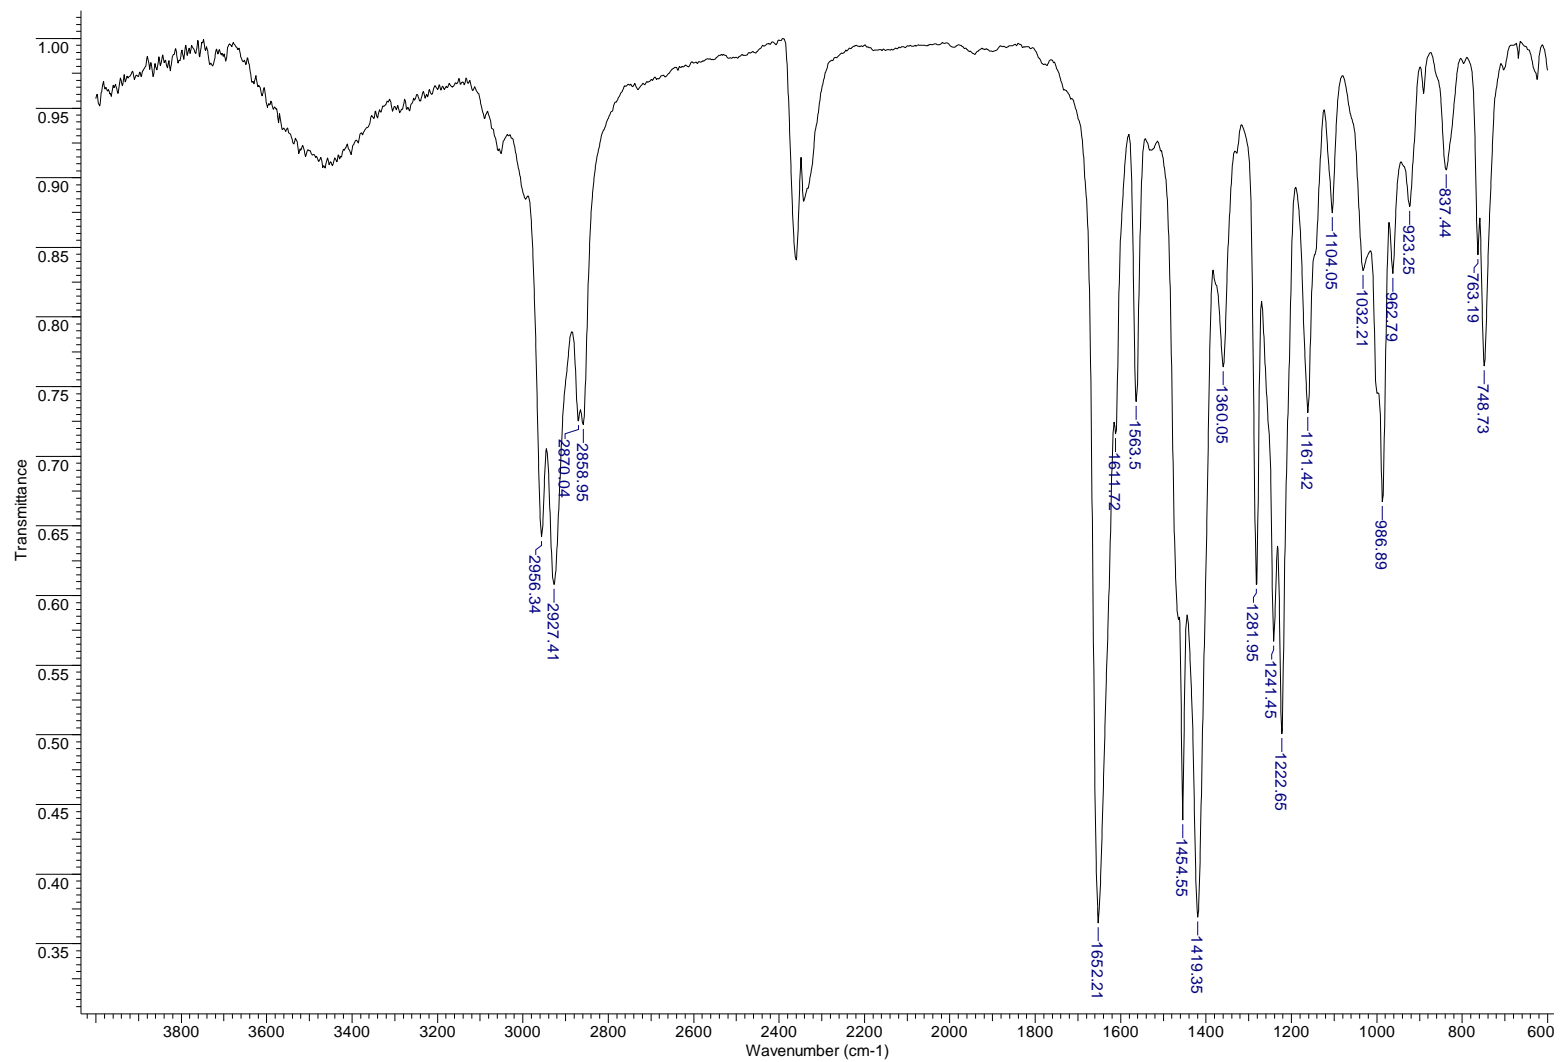

1-(1,3-Benzoxazol-2-yl)pentyl 3,4-dihydroisoquinoline-2(1H)-carbodithioate (3g)

IR (neat)

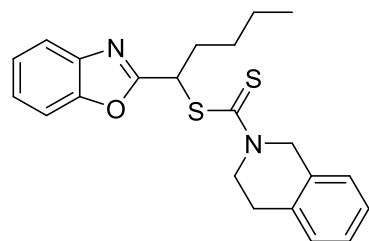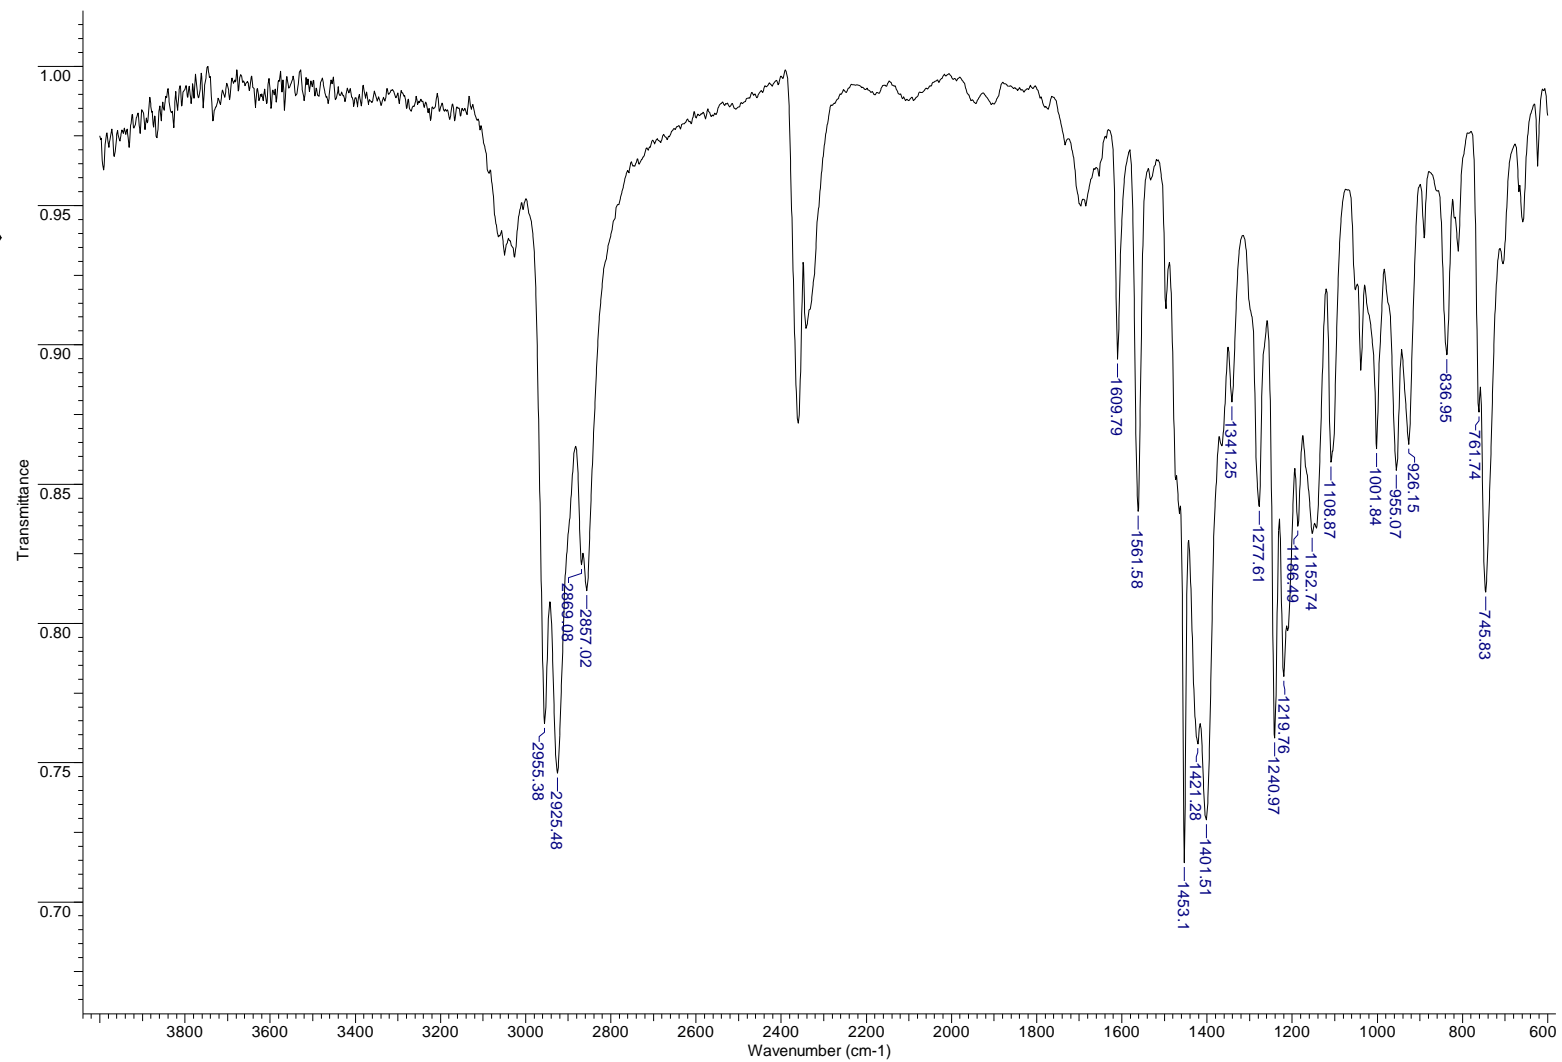

**1-(1,3-Benzoxazol-2-yl)pentyl benzyl(ethyl)dithiocarbamate (3h)**

IR (neat)

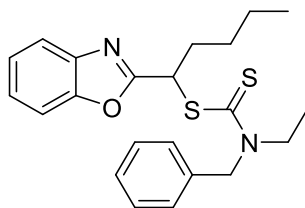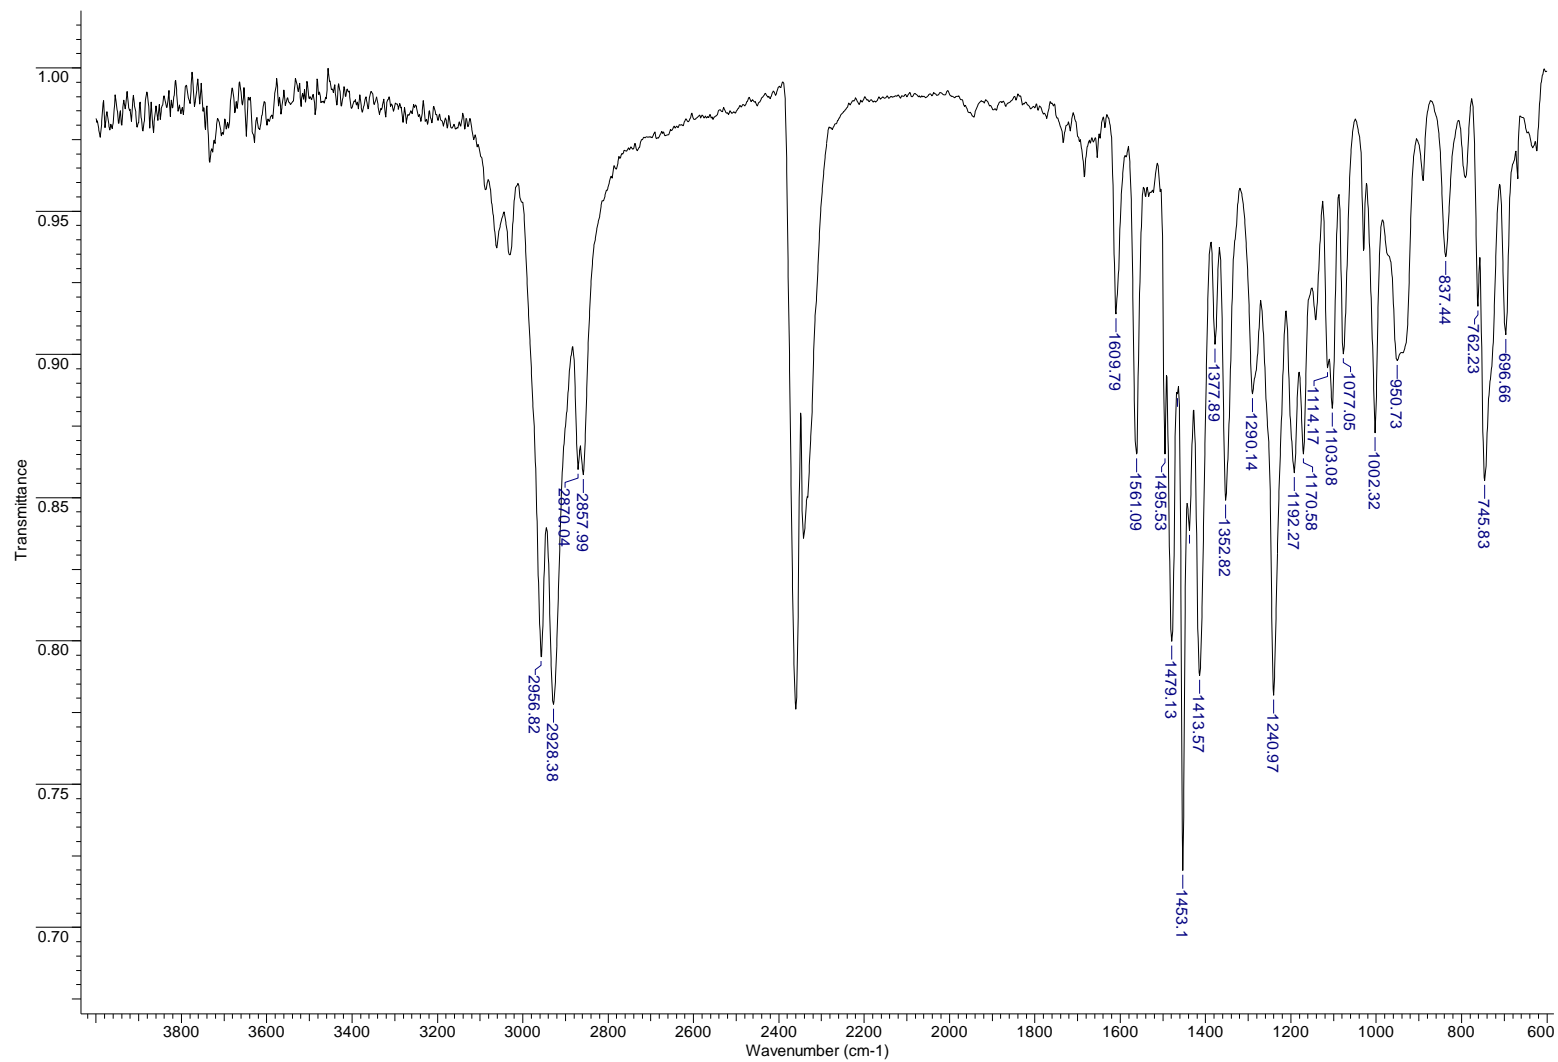

### 1-(5-Methyl-1,3-benzoxazol-2-yl)pentyl morpholine-4-carbodithioate (31)

IR (neat)

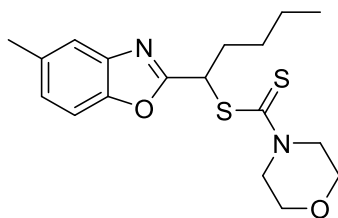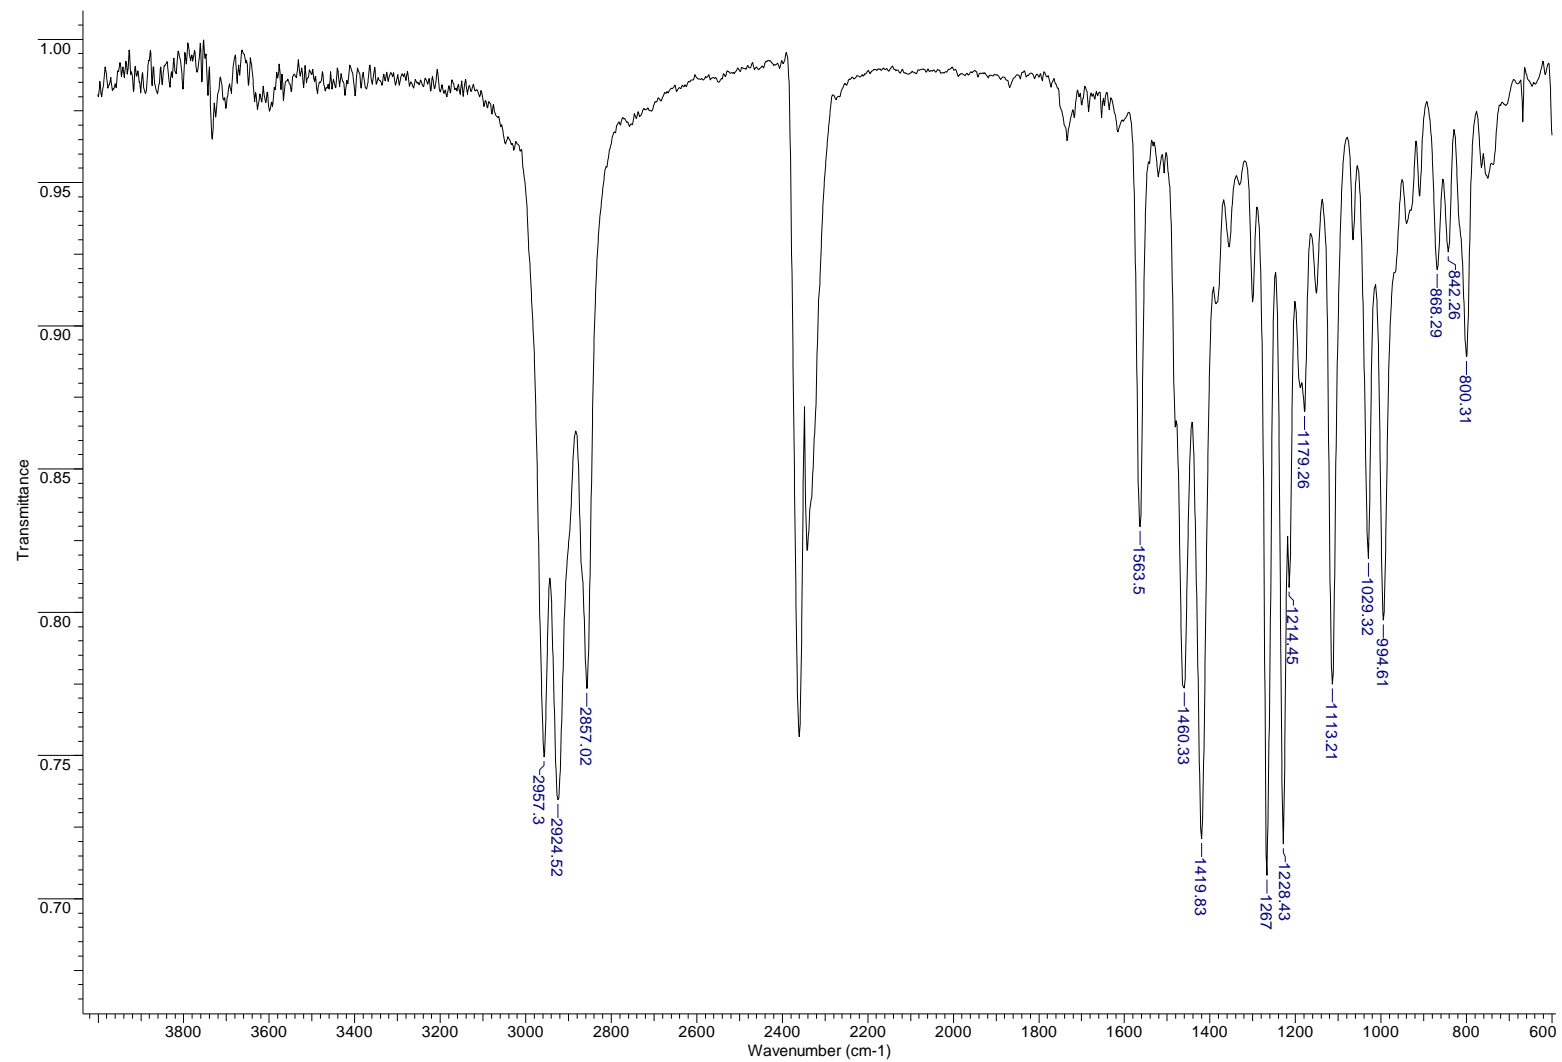

1-(5-Chloro-1,3-benzoxazol-2-yl)pentyl morpholine-4-carbodithioate (3m)

IR (neat)

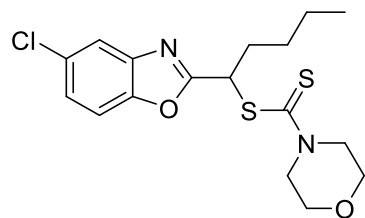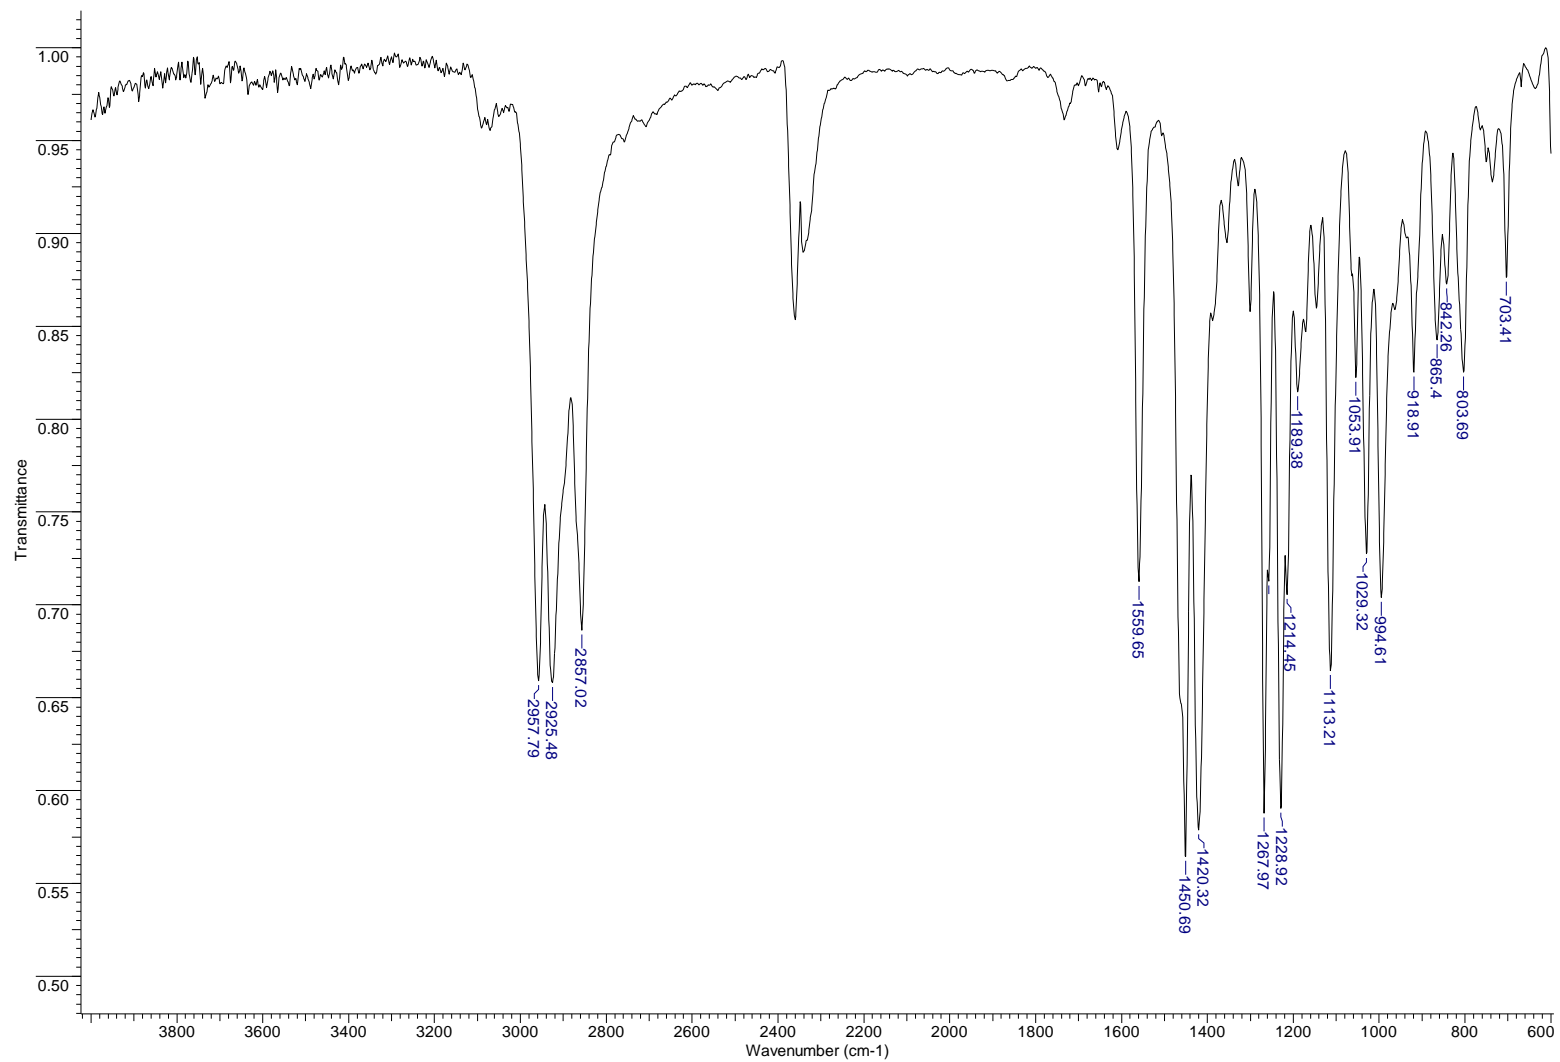



### Methyl 2-{1-[(morpholin-4-ylcarbonothioyl)thio]pentyl}-1,3-benzoxazole-5-carboxylate (3n)

IR (neat)

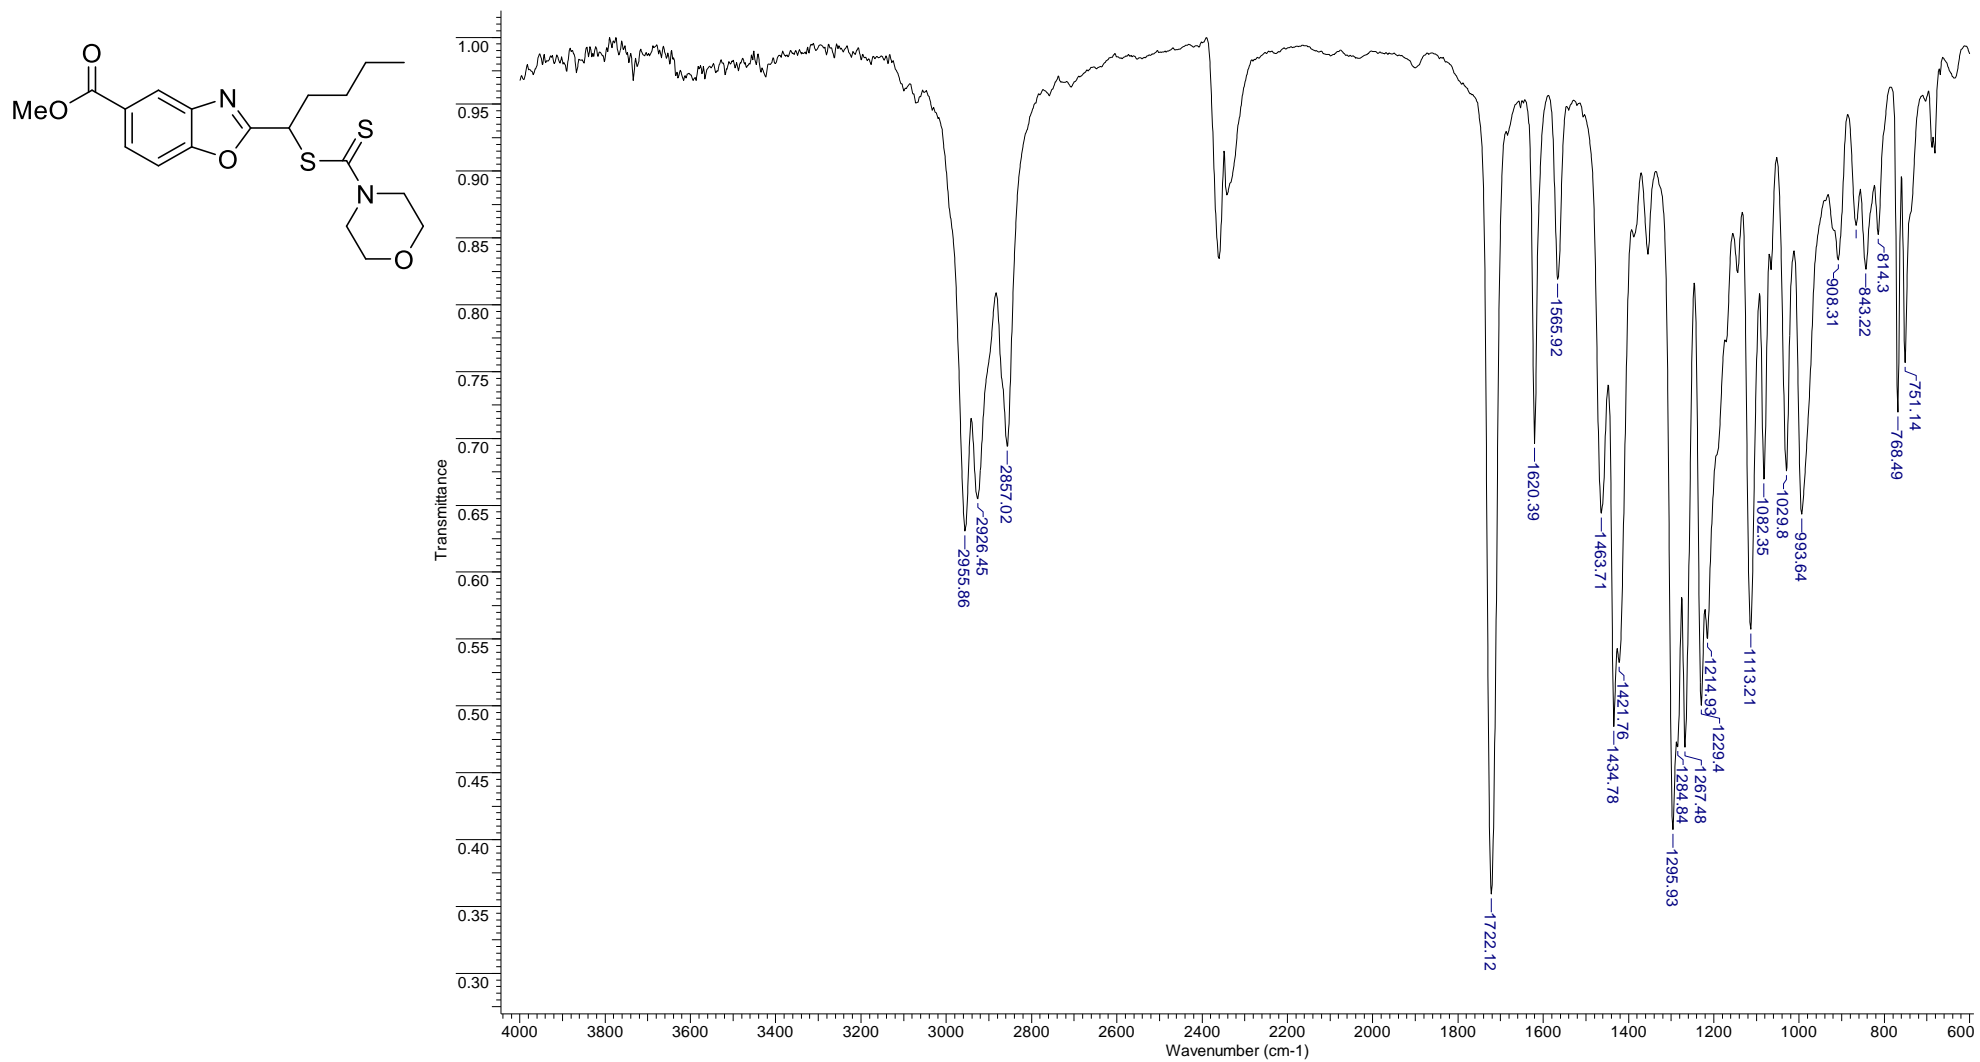

# 1-(5,7-Dichloro-6-methyl-1,3-benzoxazol-2-yl)pentyl morpholine-4-carbodithioate (3o)

IR (neat)

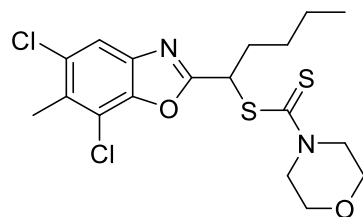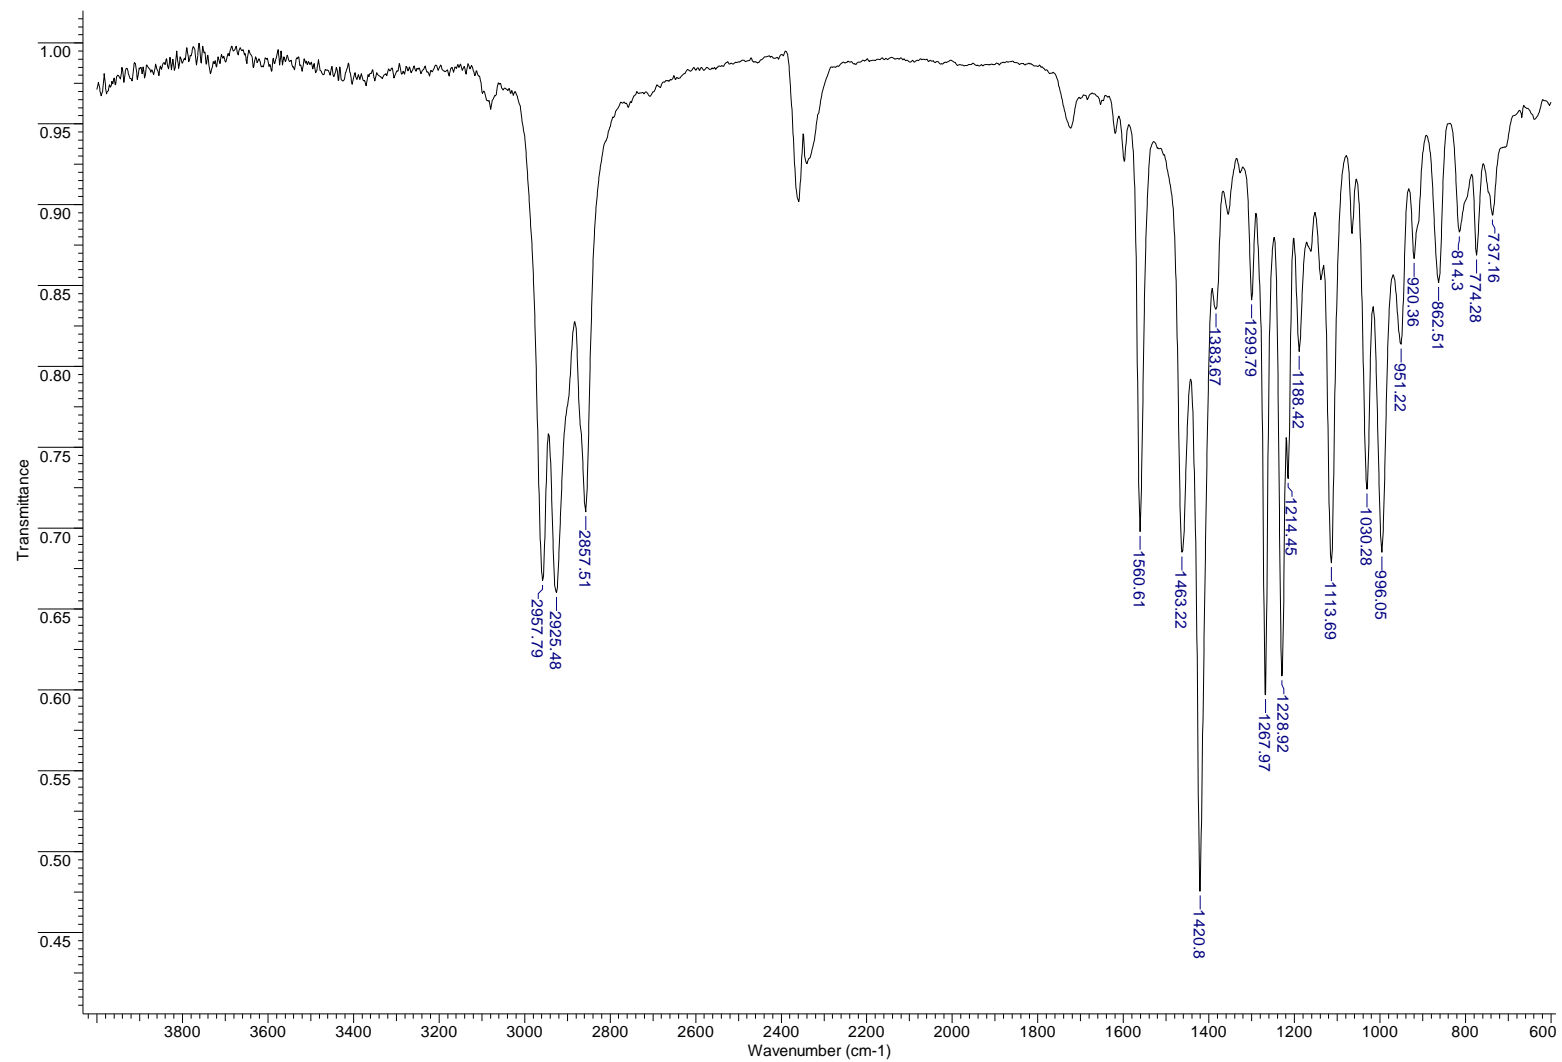

### 1-(7-Acetyl-1,3-benzoxazol-2-yl)pentyl morpholine-4-carbodithioate (3q)

IR (neat)

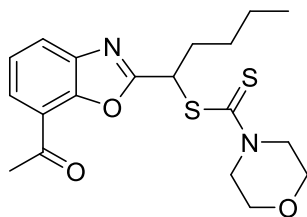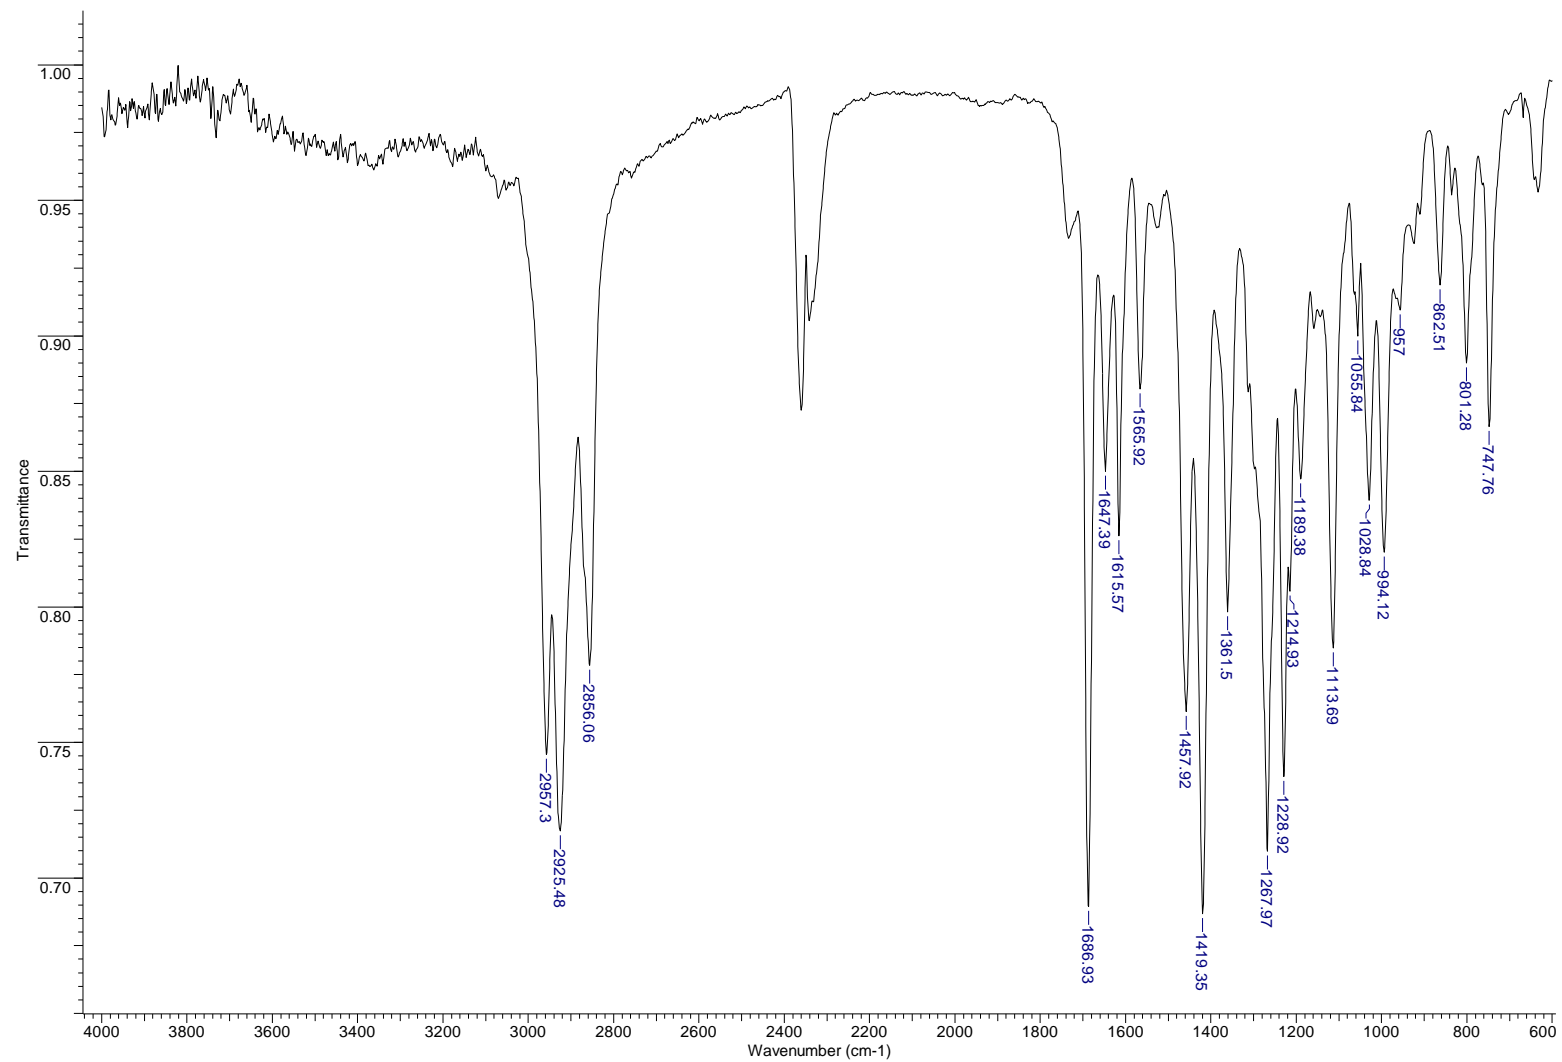

### 1-(1,3-Benzoxazol-2-yl)-4-methylpentyl morpholine-4-carbodithioate (3r)

IR (neat)

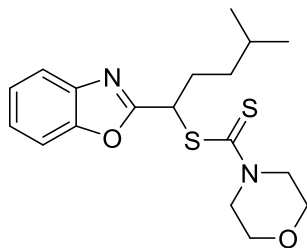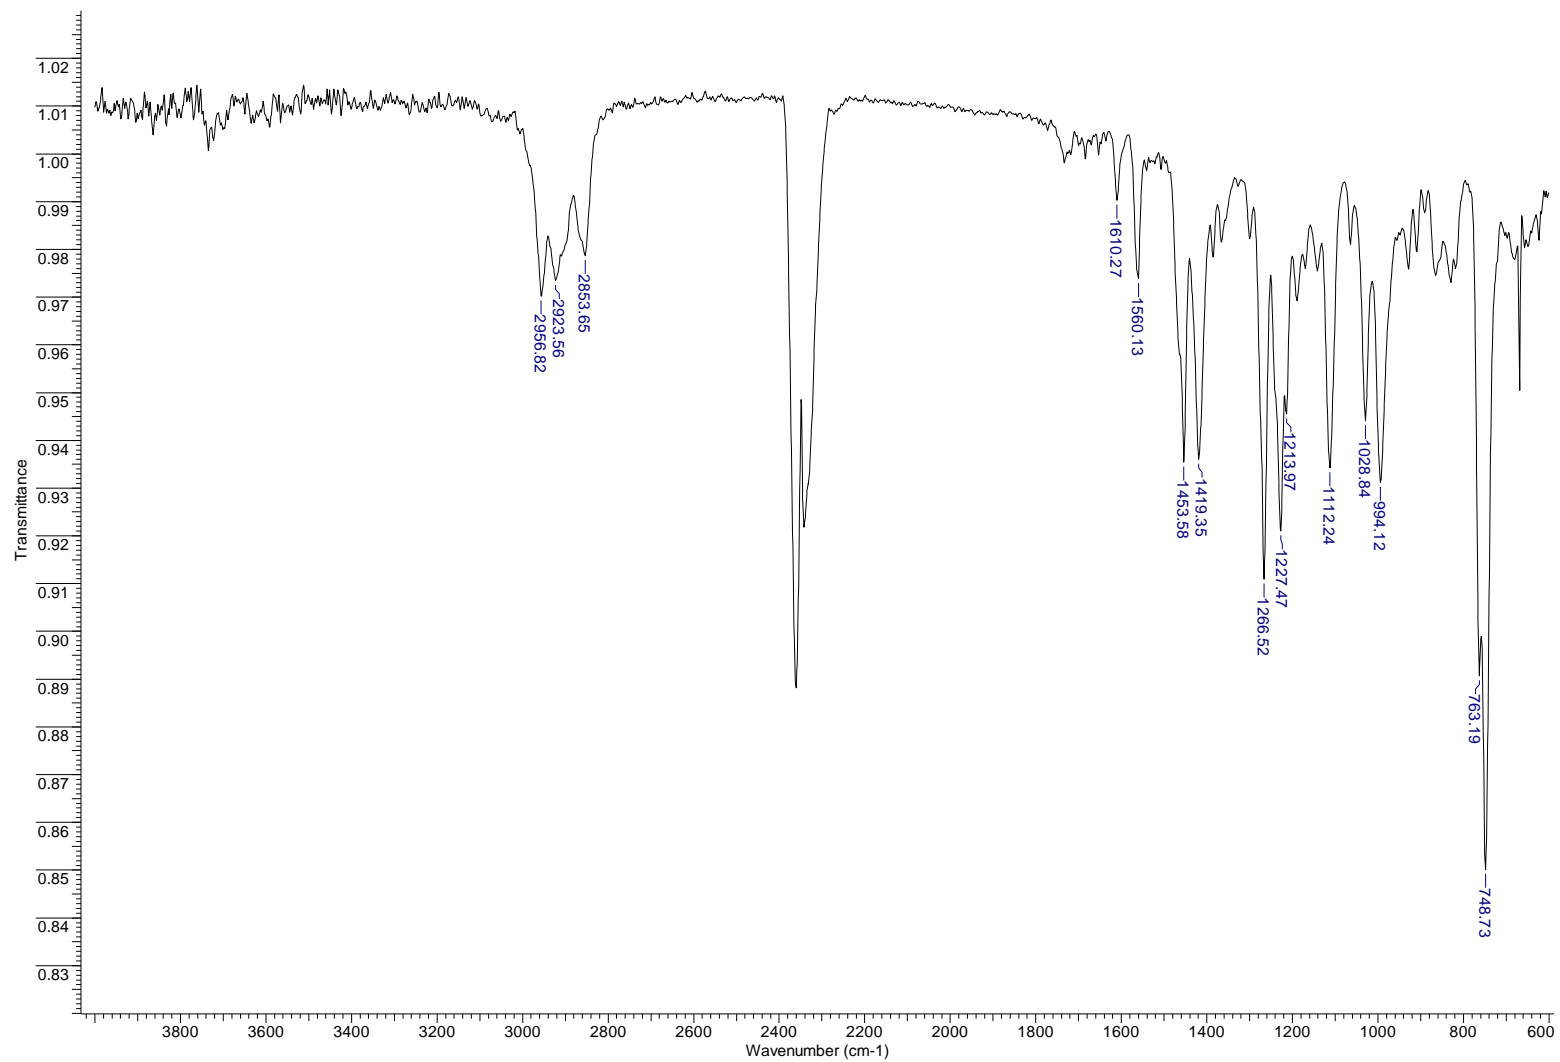

### 1-(1,3-Benzoxazol-2-yl)-2-cyclohexylethyl morpholine-4-carbodithioate (3s)

IR (neat)

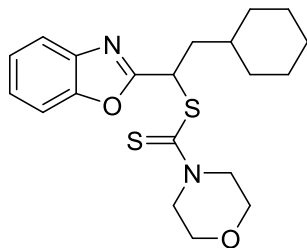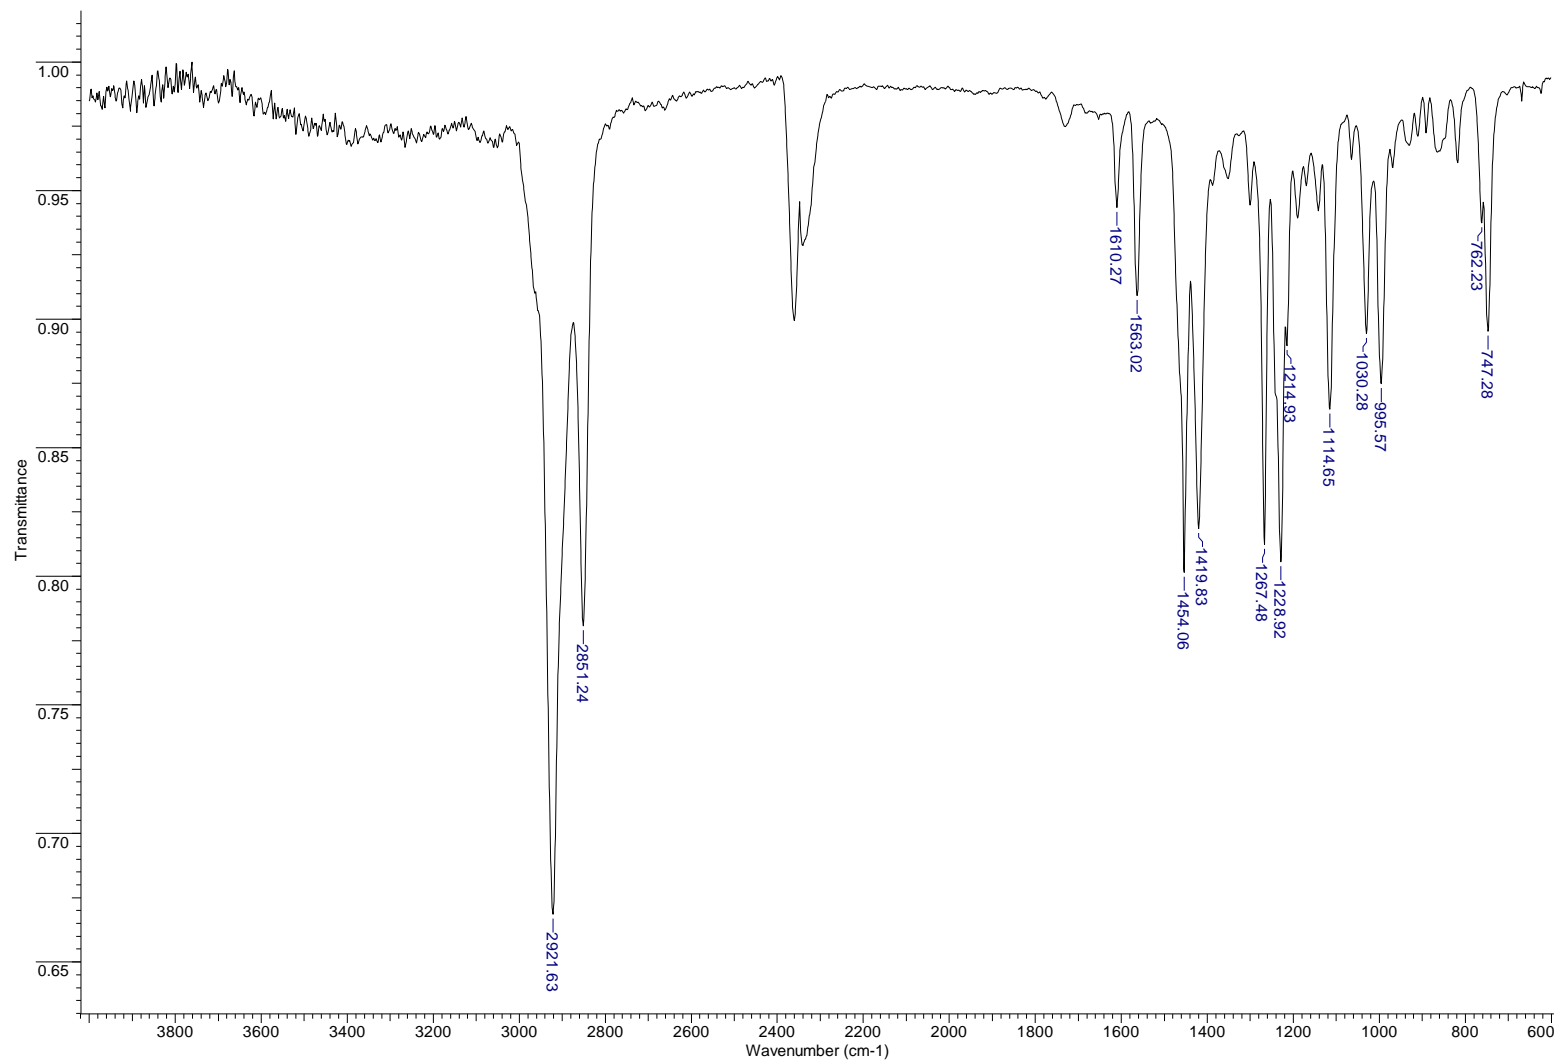

### 1-(1,3-Benzoxazol-2-yl)-3-phenylpropyl morpholine-4-carbodithioate (3t)

IR (neat)

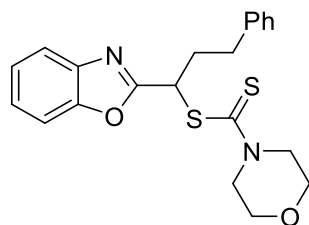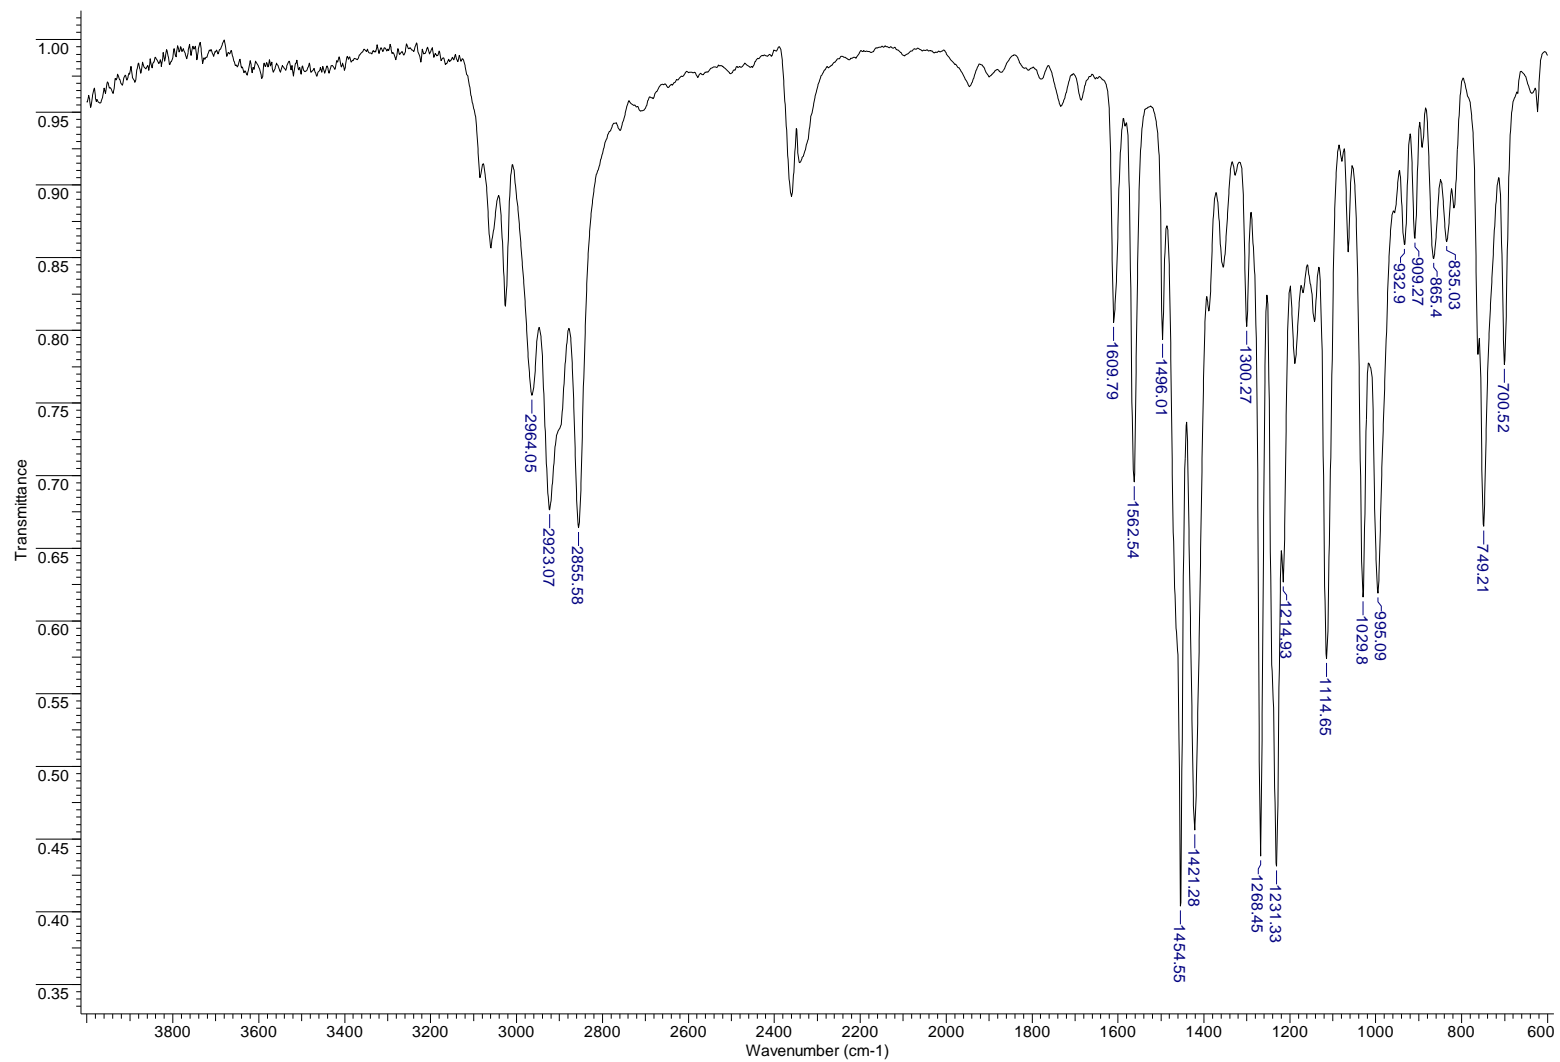

# Methyl 5-(1,3-benzoxazol-2-yl)-5-[(morpholin-4-ylcarbonothioyl)thio]pentanoate (3u)

IR (neat)

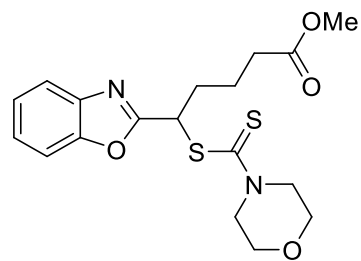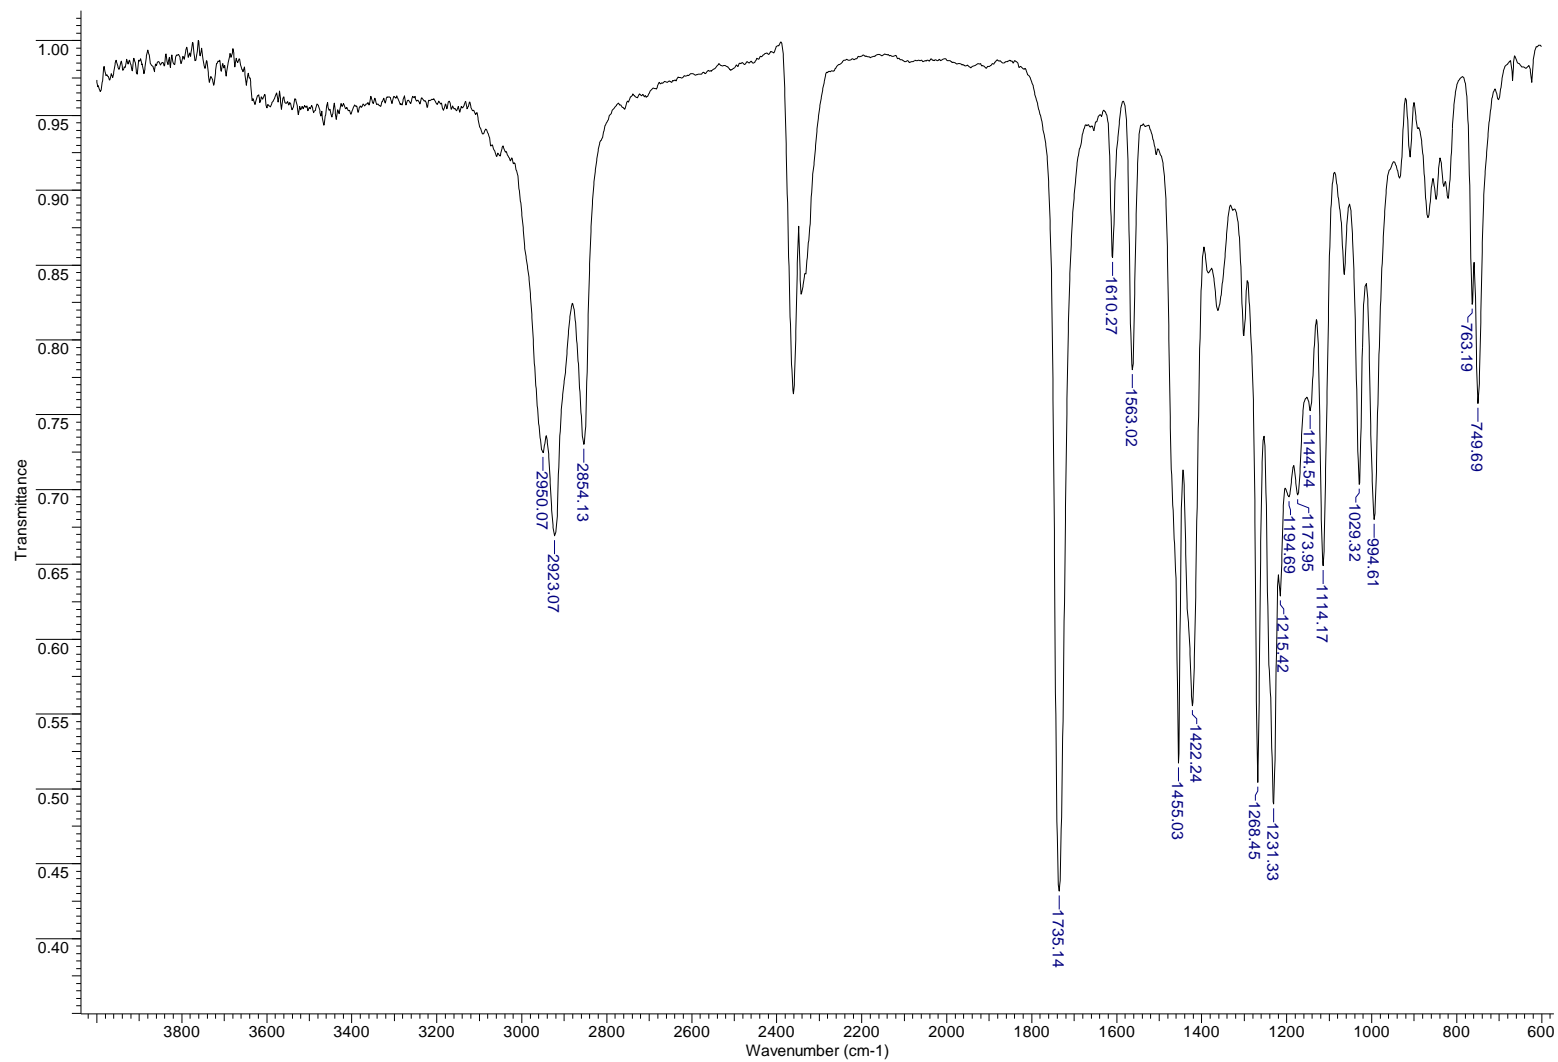

### 1-(1,3-Benzoxazol-2-yl)-3-hydroxypropyl morpholine-4-carbodithioate (3v)

IR (neat)

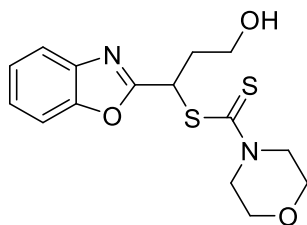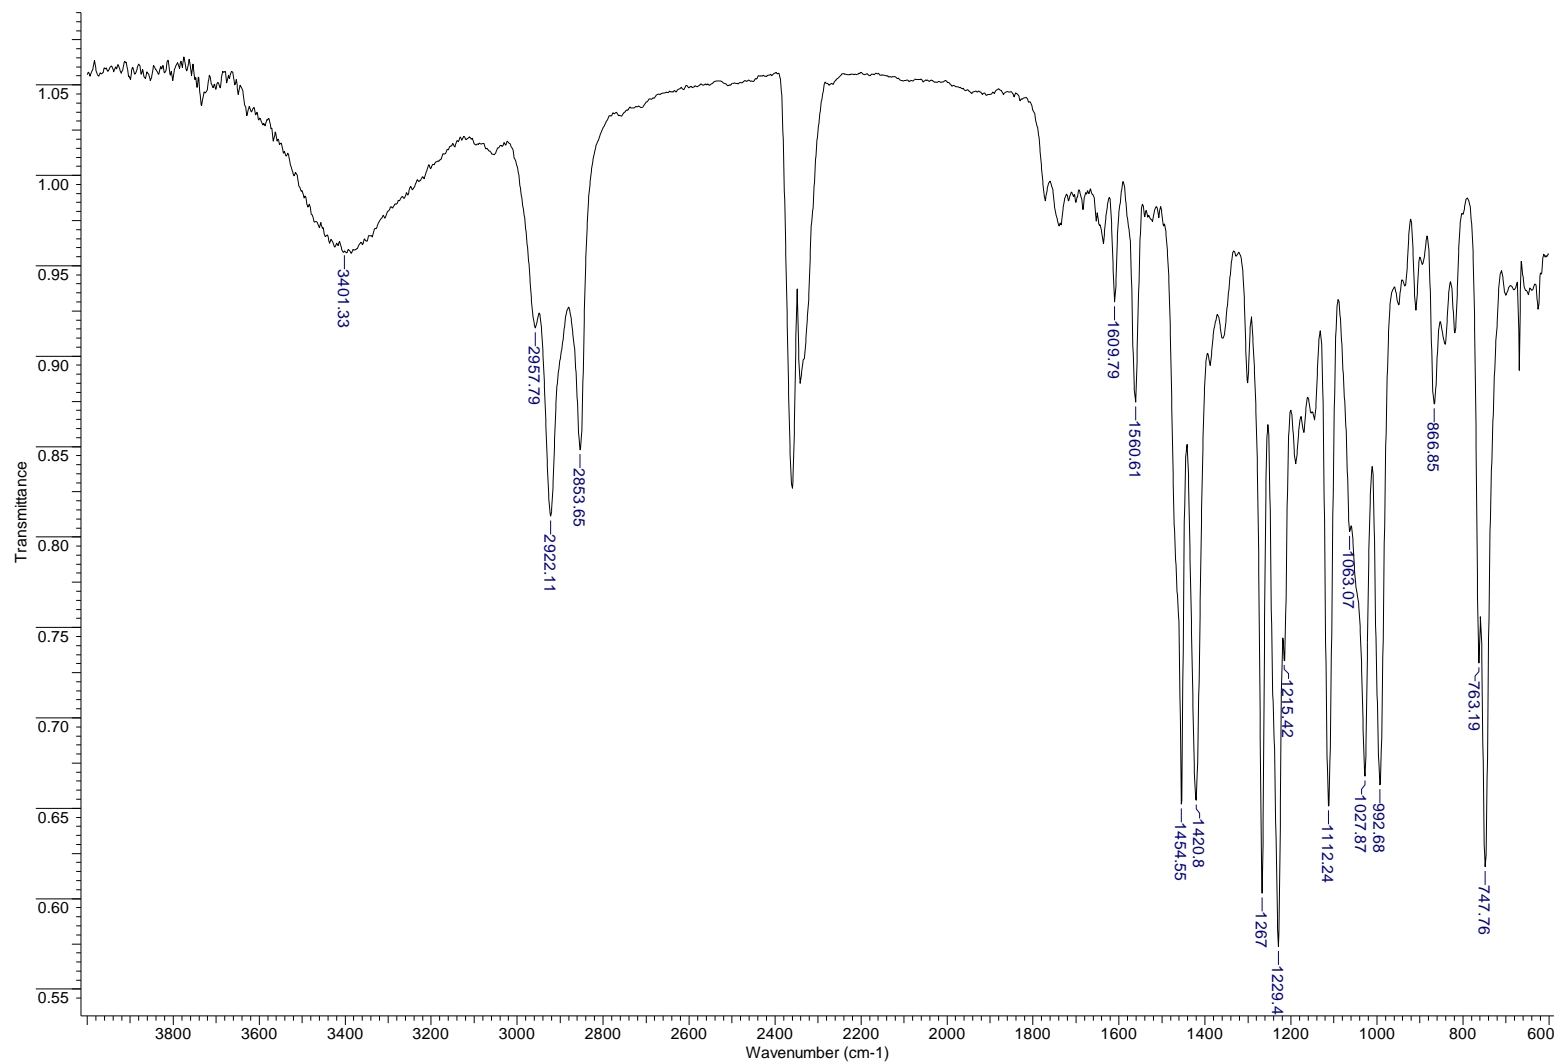



1-([2-(Morpholin-4-ylcarbonyl)phenyl]amino)carbonyl)pentyl morpholine-4-carbodithioate (11a)

IR (neat)

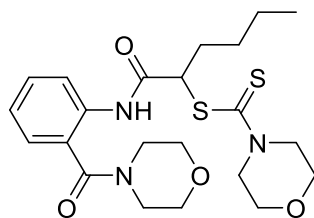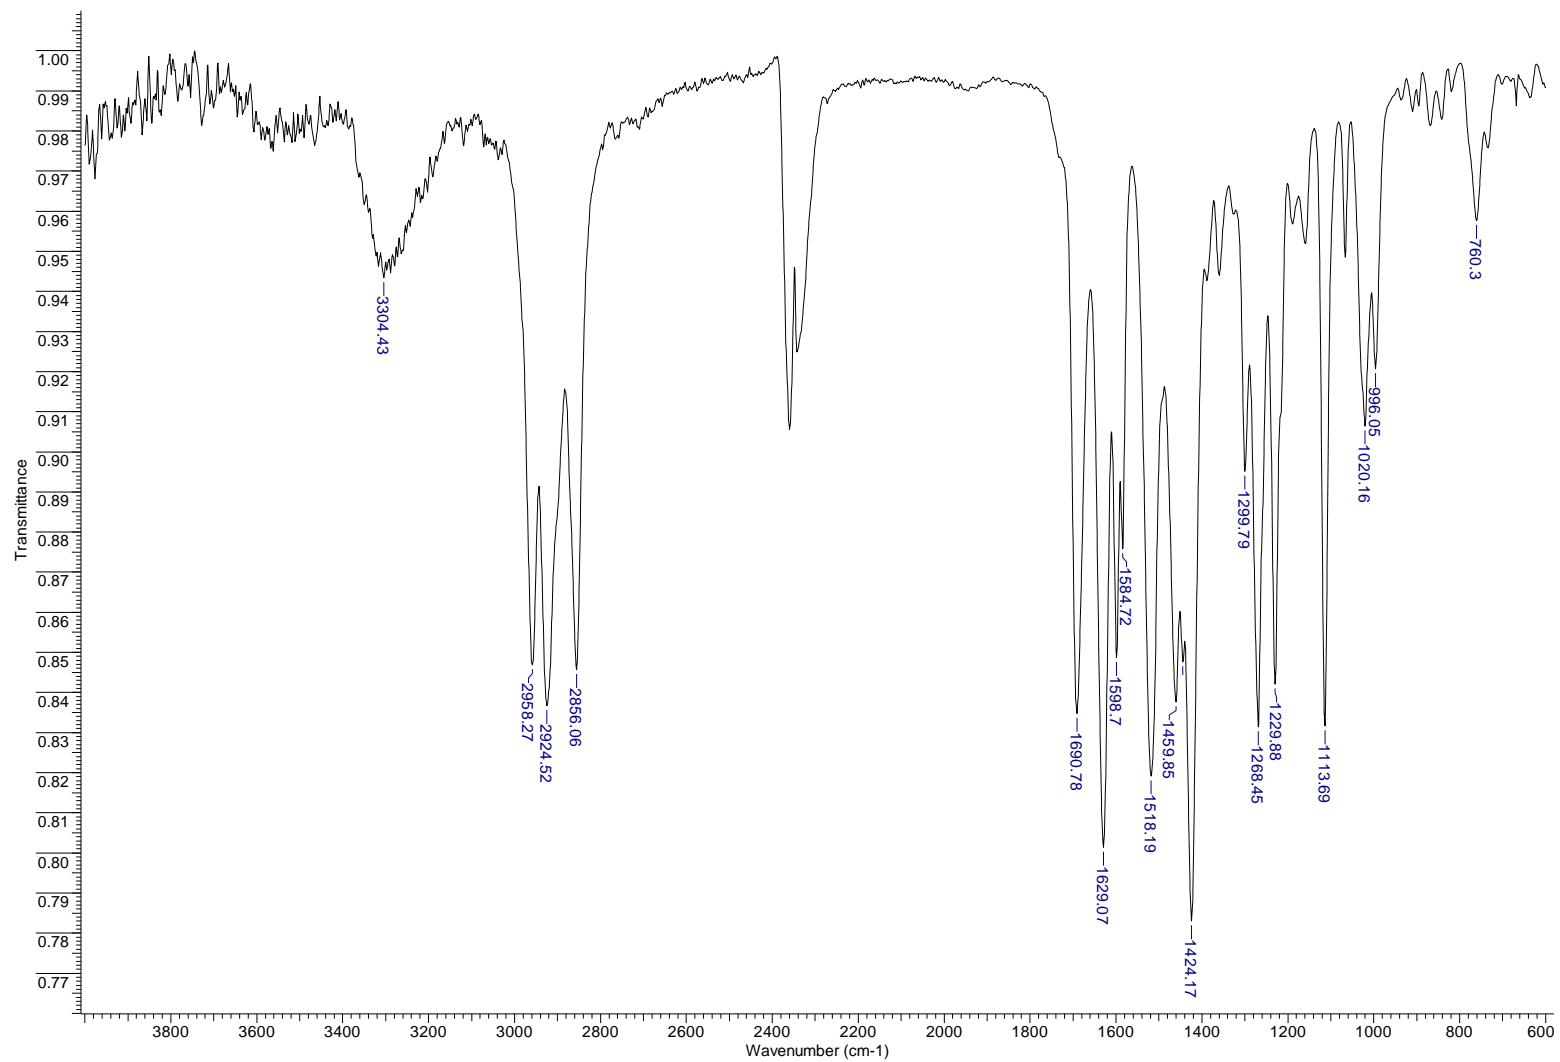

1-([2-(Piperidin-4-ylcarbonyl)phenyl]amino)carbonyl)pentyl piperidine-4-carbodithioate (11b)

IR (neat)

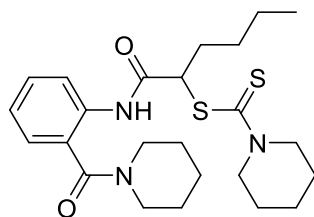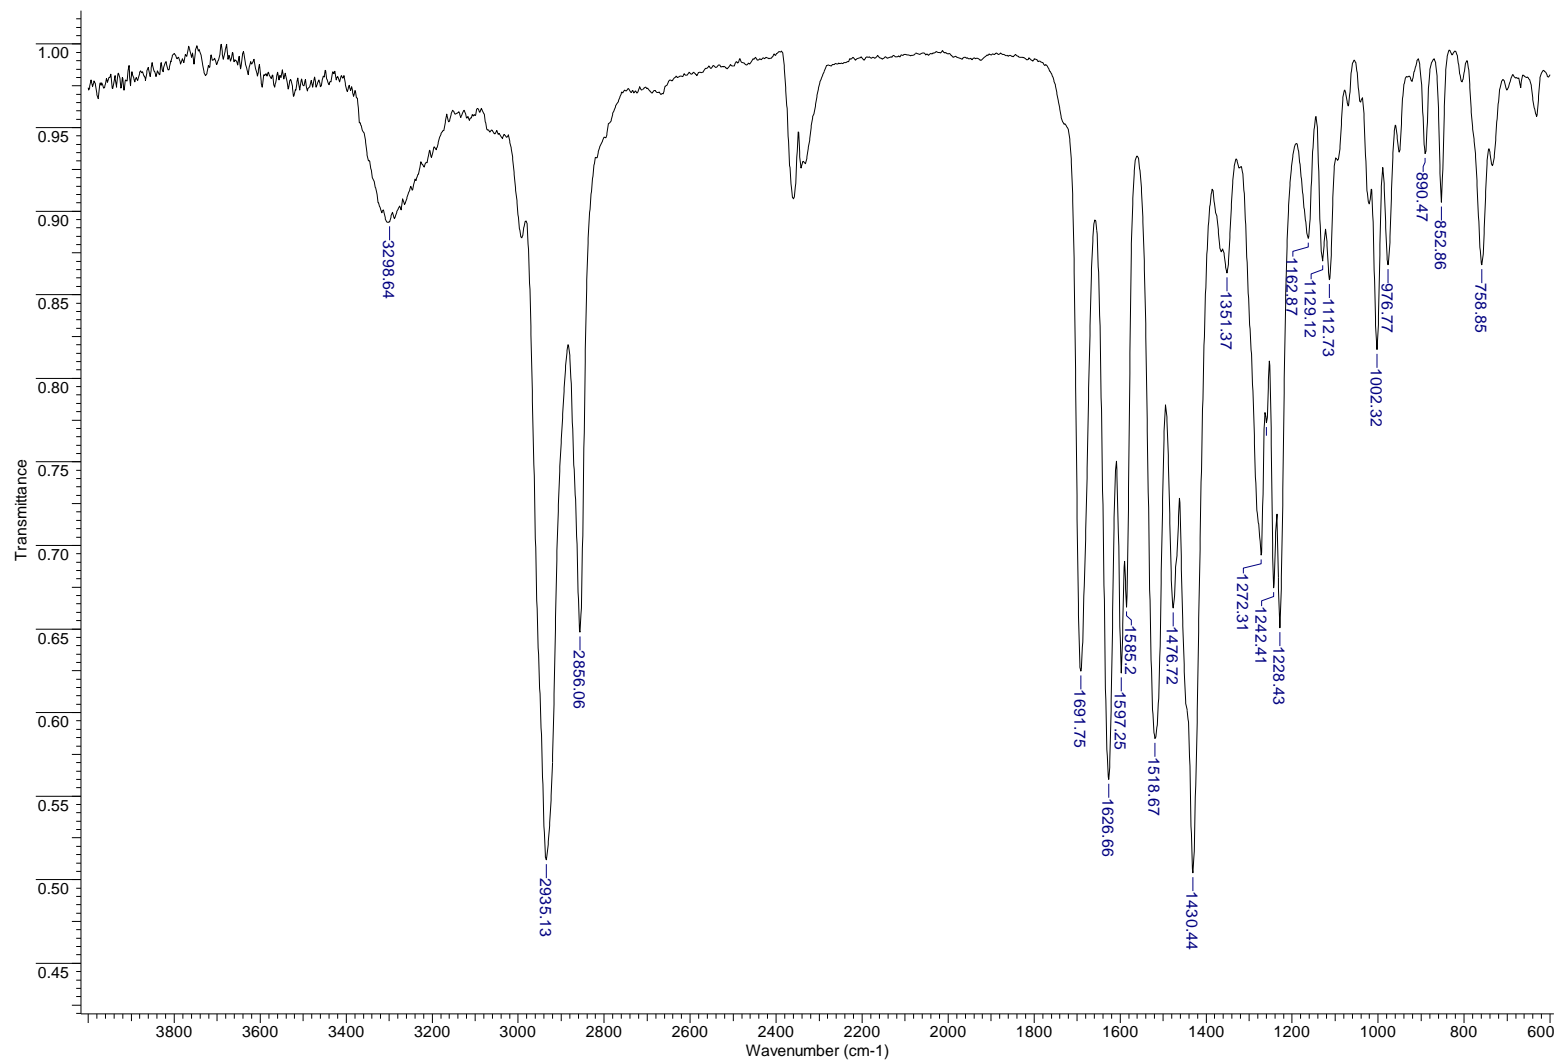

1-([2-(Pyrrolidin-4-ylcarbonyl)phenyl]amino)carbonyl)pentyl pyrrolidine-4-carbodithioate (11c)

IR (neat)

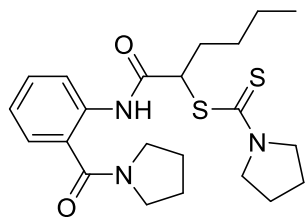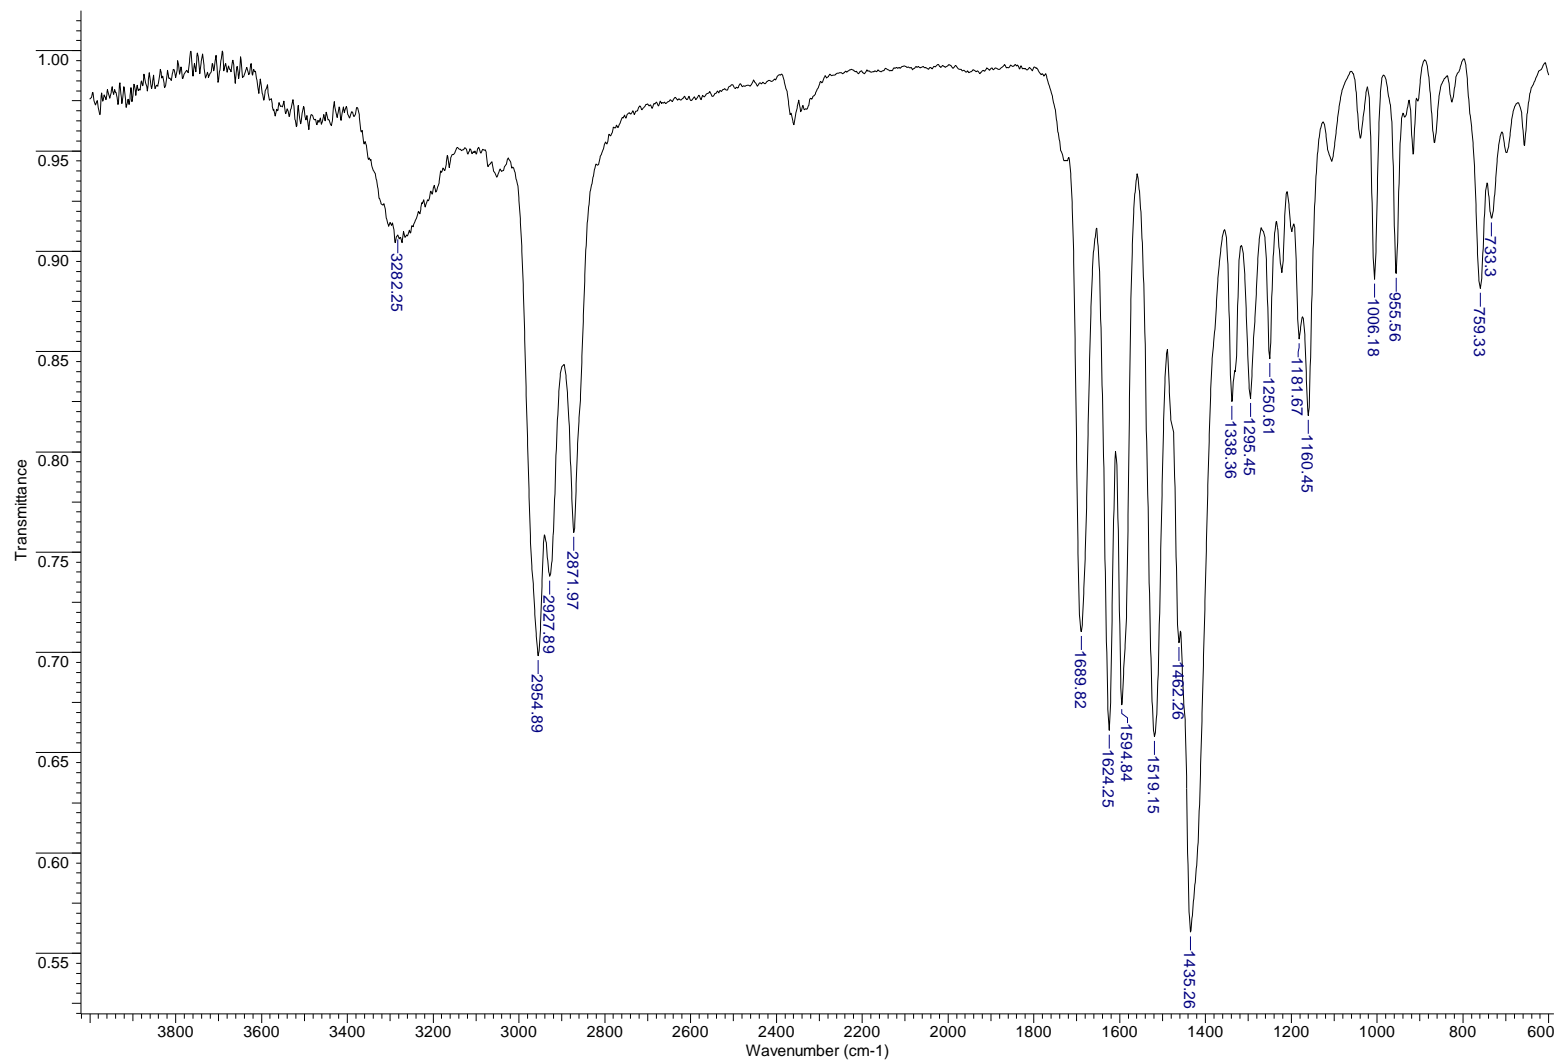

1-([2-(Thiomorpholin-4-ylcarbonyl)phenyl]amino)carbonyl)pentyl thiomorpholine-4-carbodithioate (11d)

IR (neat)

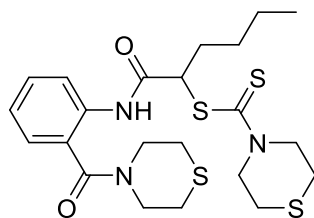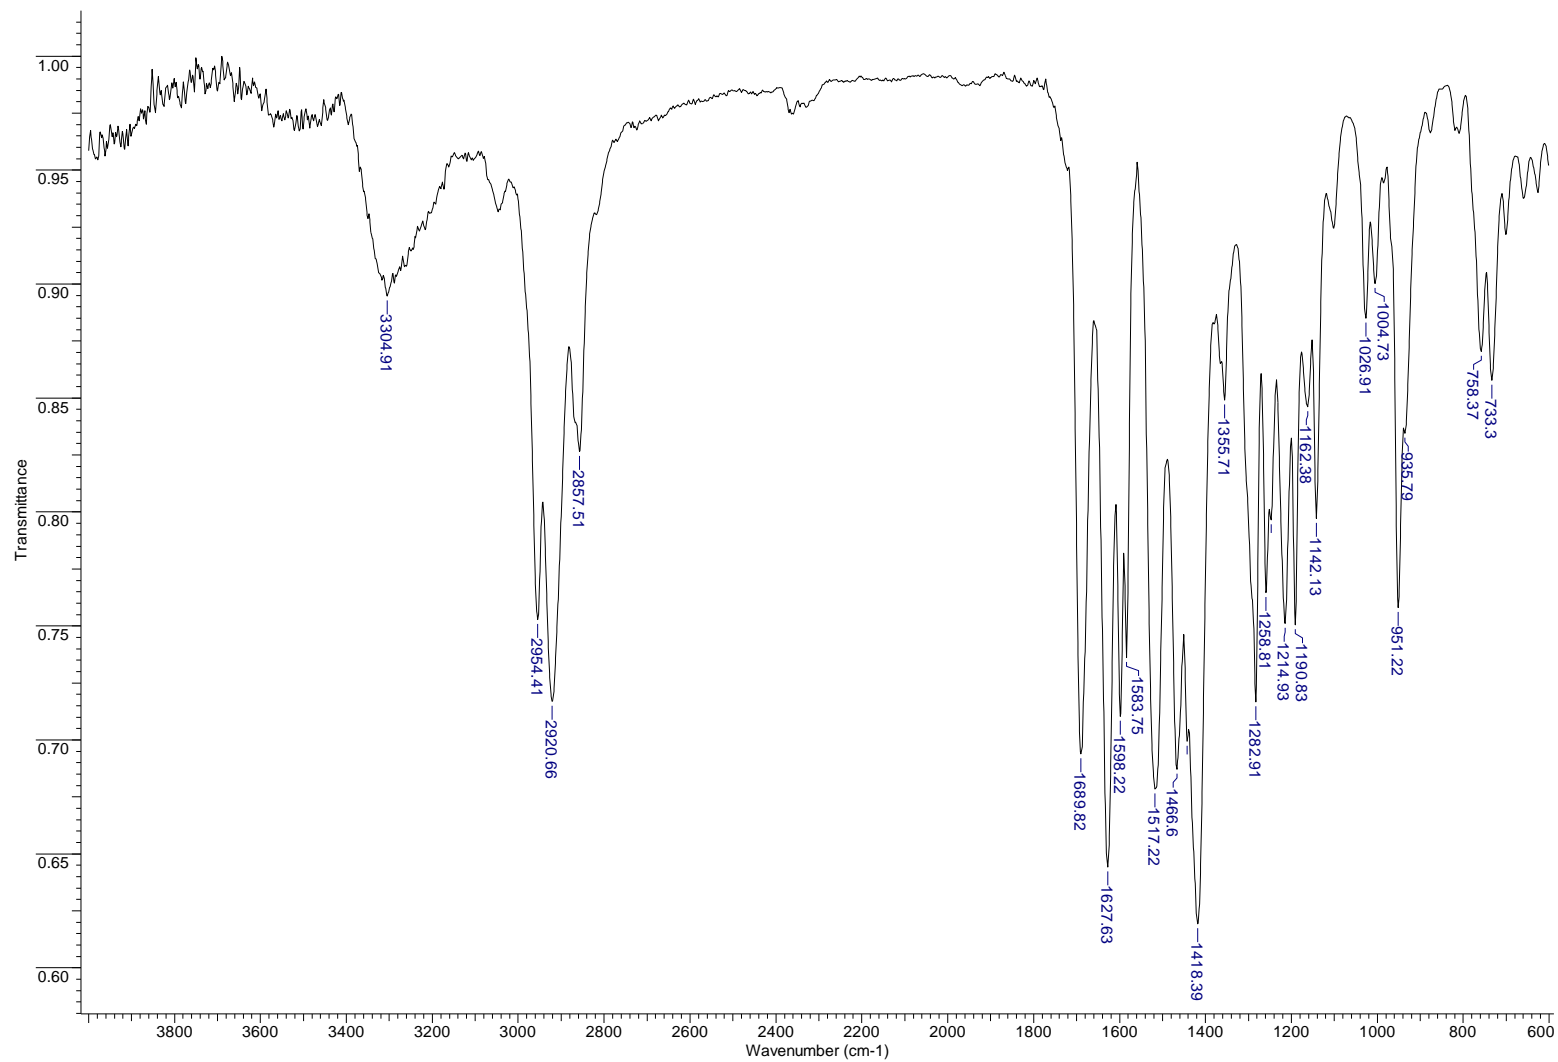

1-([4-Bromo-2-(pyrrolidin-1-ylcarbonyl)phenyl]amino)carbonyl)pentyl pyrrolidine-1-carbodithioate (11e)

IR (neat)

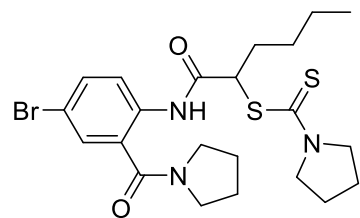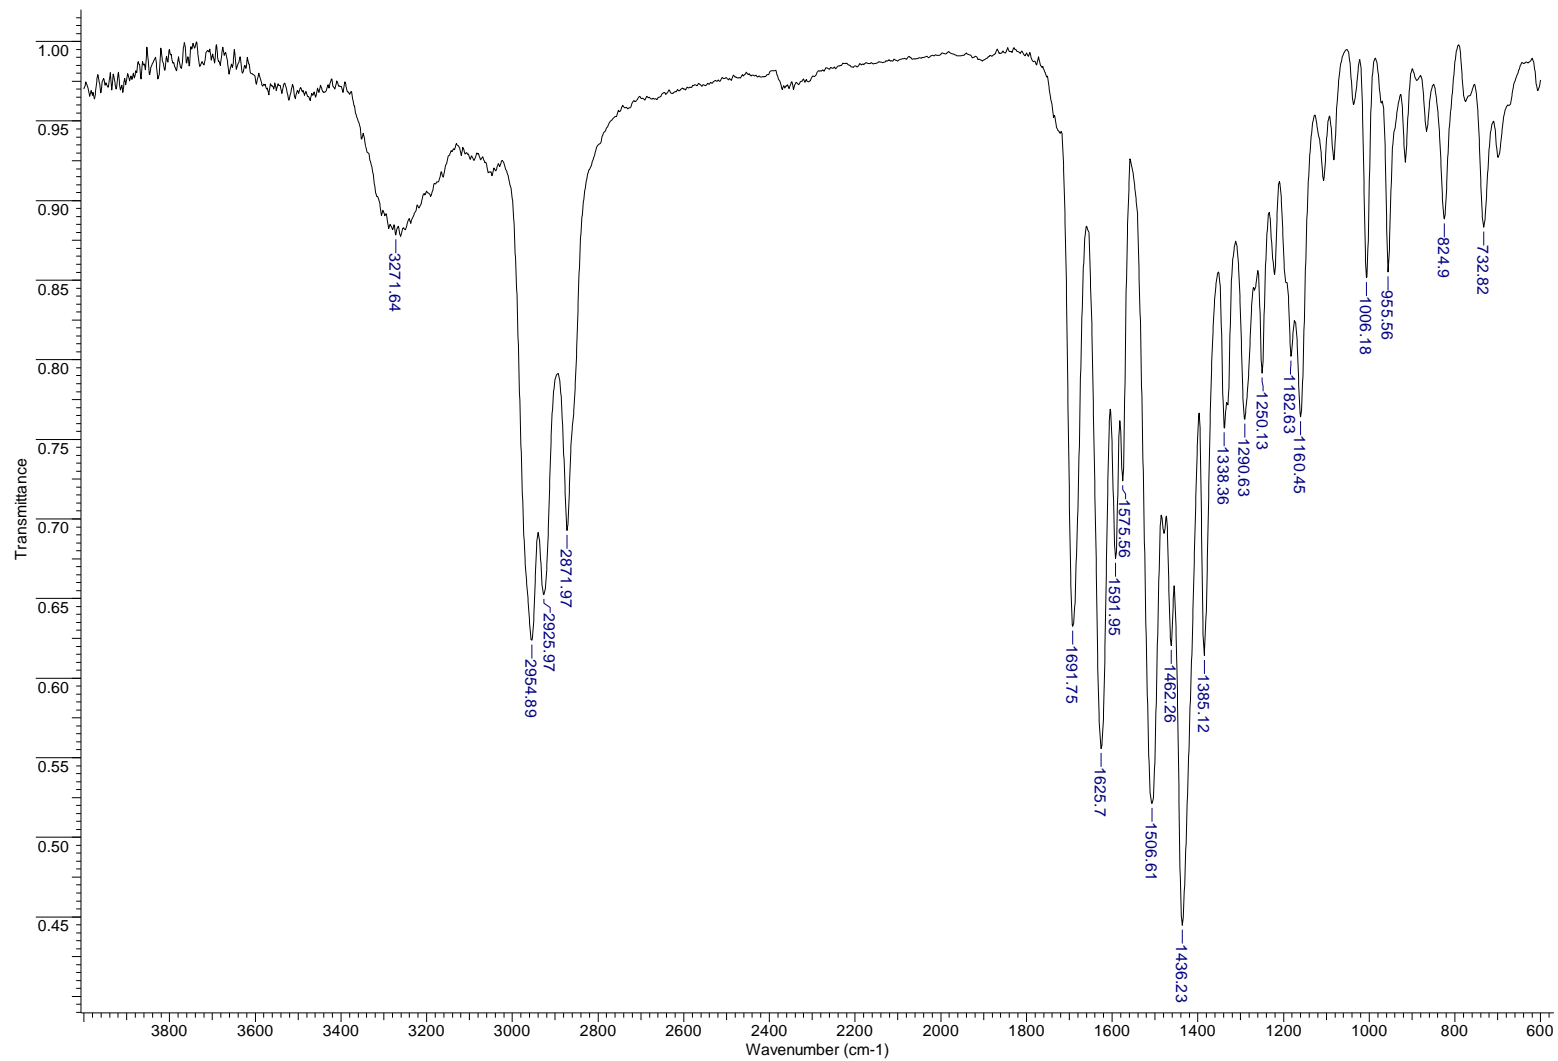

## References

- <sup>1</sup> Kotovshchikov, Y. N.; Latyshev, G. V.; Navasardyan, M. A.; Erzunov, D. A.; Beletskaya, I. P.; Lukashev, N. V. *Org. Lett.* **2018**, *20*, 4467–4470.
- <sup>2</sup> Gevondian, A. G.; Kotovshchikov, Y. N.; Latyshev, G. V.; Lukashev, N. V.; Beletskaya, I. P. *J. Org. Chem.* **2021**, *86*, 5639–5650.
- <sup>3</sup> Kotovshchikov, Y. N.; Latyshev, G. V.; Kirillova, E. A.; Moskalenko, U. D.; Lukashev, N. V.; Beletskaya, I. P. *J. Org. Chem.* **2020**, *85*, 9015–9028.
- <sup>4</sup> Sun, J.; Kozmin, S. *J. Am. Chem. Soc.* **2005**, *127*, 13512–13513.
- <sup>5</sup> Voloshkin, V. A.; Kotovshchikov, Y. N.; Latyshev, G. V.; Lukashev, N. V.; Beletskaya, I. P. *J. Org. Chem.* **2022**, *87*, 7064–7075.
